# Supplementary material for: DeePred-BBB: A Blood Brain Barrier Permeability Prediction Model With Improved Accuracy
Source: Front Neurosci. 2022 May 3;16:858126. doi: 10.3389/fnins.2022.858126 (PMC9112838; doi:10.3389/fnins.2022.858126)
Supplement: Supplementary file 1 [file Table_1.XLSX]

## Sheet: Data Set
SL	Compounds	PID	BBB-Class	References
1	SCC(=O)[C@@]1(O)[C@@]2(C)[C@H]([C@H]3[C@H]([C@H](O)C2)[C@]2(C)C(=CC(=O)CC2)CC3)CC1	NA	1	Roy et al. ACS Omega. 2019; 4(16):16774-16780. DOI: 10.1021/acsomega.9b01512		BBB-Class 1: Permeable
2	s1cc(nc1[NH]=C(N)N)C	6928896	1	Zhao et al. J Chem Inf Model. 2007;47(1):170–175. DOI:10.1021/ci600312d		BBB-Class 0: Non-permeable
3	s1cc(CSCCNC(NC)=[NH]C#N)nc1[NH]=C(N)N	NA	1	Zhao et al. J Chem Inf Model. 2007;47(1):170–175. DOI:10.1021/ci600312d
4	s1c(ncc1)CCN	87653	1	Zhao et al. J Chem Inf Model. 2007;47(1):170–175. DOI:10.1021/ci600312d
5	S=P(N1CC1)(N2CC2)N3CC3	5453	1	Zhao et al. J Chem Inf Model. 2007;47(1):170–175. DOI:10.1021/ci600312d
6	S=C2NCCC(COc1ccccc1)O2	3033964	1	Zhao et al. J Chem Inf Model. 2007;47(1):170–175. DOI:10.1021/ci600312d
7	S=C1O[C@@H](COc2ccccc2)CCN1	76956243	1	Roy et al. ACS Omega. 2019; 4(16):16774-16780. DOI: 10.1021/acsomega.9b01512
8	S=C1NC(=O)C(CC=C)([C@H]2C=CCCC2)C(=O)N1	76958938	1	Roy et al. ACS Omega. 2019; 4(16):16774-16780. DOI: 10.1021/acsomega.9b01512
9	S=C1NC(=O)C([C@@H](CCC)CC)(CC)C(=O)N1	76957224	1	Roy et al. ACS Omega. 2019; 4(16):16774-16780. DOI: 10.1021/acsomega.9b01512
10	S=C1NC(=O)C([C@@H](CCC)C)(CC=C)C(=O)N1	3033021	1	Roy et al. ACS Omega. 2019; 4(16):16774-16780. DOI: 10.1021/acsomega.9b01512
11	S=C1NC(=O)C([C@@H](CCC)C)(CC)C(=O)N1	3033017	1	Roy et al. ACS Omega. 2019; 4(16):16774-16780. DOI: 10.1021/acsomega.9b01512
12	S=C1N(CC=C)C(=O)[C@H](CC(C)C)N1	801221	1	Roy et al. ACS Omega. 2019; 4(16):16774-16780. DOI: 10.1021/acsomega.9b01512
13	S(SC[C@H]1OCCC1)/C(=C(/N(C=O)Cc1c(N)nc(C)nc1)\C)/CCO	6604305	1	Roy et al. ACS Omega. 2019; 4(16):16774-16780. DOI: 10.1021/acsomega.9b01512
14	S(S/C(=C(/N(C=O)Cc1c(N)nc(C)nc1)\C)/CCOC(=O)c1ccccc1)/C(=C(/N(C=O)Cc1c(N)nc(C)nc1)\C)/CCOC(=O)c1ccccc1	3034022	1	Roy et al. ACS Omega. 2019; 4(16):16774-16780. DOI: 10.1021/acsomega.9b01512
15	S(CCNCNC)Cc1c(C)[nH]cn1.N#CN	NA	0	Roy et al. ACS Omega. 2019; 4(16):16774-16780. DOI: 10.1021/acsomega.9b01512
16	S(CCNC1=NCC(Cc2cnc(C)cc2)=CN1)Cc1oc(CN(C)C)cc1	NA	0	Roy et al. ACS Omega. 2019; 4(16):16774-16780. DOI: 10.1021/acsomega.9b01512
17	S(CCNC=N)C1=C(C(=O)O)N2C(=O)[C@H]([C@H](O)C)[C@H]2C1	104838	0	Roy et al. ACS Omega. 2019; 4(16):16774-16780. DOI: 10.1021/acsomega.9b01512
18	S(CCN[C@H](NC#N)NC)Cc1nc(N[C-]([N+H3])N)sc1	NA	1	Roy et al. ACS Omega. 2019; 4(16):16774-16780. DOI: 10.1021/acsomega.9b01512
19	S(CCN[C@@H](NC)C[N+](=O)[O-])Cc1oc(CN(C)C)cc1	NA	0	Roy et al. ACS Omega. 2019; 4(16):16774-16780. DOI: 10.1021/acsomega.9b01512
20	S(CCN[C@@H](NC#N)NC)Cc1nc(N[C-]([N+H3])N)sc1	NA	1	Roy et al. ACS Omega. 2019; 4(16):16774-16780. DOI: 10.1021/acsomega.9b01512
21	S(CCC1([C@H](CCC)C)C(=O)NC(=S)NC1=O)C	76958227	1	Roy et al. ACS Omega. 2019; 4(16):16774-16780. DOI: 10.1021/acsomega.9b01512
22	S(CC1=C(C(=O)OCC2=C(C)OC(=O)O2)N2C(=O)[C@@H](NC(=O)[C@H](OC(=O)[C@@H](N)C)c3ccccc3)[C@H]2SC1)c1sc(C)nn1	179697	0	Roy et al. ACS Omega. 2019; 4(16):16774-16780. DOI: 10.1021/acsomega.9b01512
23	S(CC1=C(C(=O)O)N2C(=O)[C@H](NC(=O)Cn3nnnc3)[C@@H]2SC1)c1sc(C)nn1	7048626	0	Roy et al. ACS Omega. 2019; 4(16):16774-16780. DOI: 10.1021/acsomega.9b01512
24	S(CC1=C(C(=O)O)N2C(=O)[C@H](NC(=O)[C@H](O)c3ccccc3)[C@H]2SC1)c1n(C)nnn1	12853014	0	Roy et al. ACS Omega. 2019; 4(16):16774-16780. DOI: 10.1021/acsomega.9b01512
25	S(CC1=C(C(=O)O)N2C(=O)[C@H](NC(=O)[C@@H](NC(=O)N3C(=O)C(=O)N(CC)CC3)c3ccc(O)cc3)[C@H]2SC1)c1n(C)nnn1	7048628	0	Roy et al. ACS Omega. 2019; 4(16):16774-16780. DOI: 10.1021/acsomega.9b01512
26	S(CC1=C(C(=O)O)N2C(=O)[C@H](NC(=O)[C@@H](N)c3ccc(O)cc3)[C@@H]2SC1)c1sc(C)nn1	NA	0	Roy et al. ACS Omega. 2019; 4(16):16774-16780. DOI: 10.1021/acsomega.9b01512
27	S(CC1=C(C(=O)O)N2C(=O)[C@H](NC(=O)/C(=N/OC)/c3nc(N)sc3)[C@H]2SC1)c1sc(CC(=O)O)c(C)n1	13195836	0	Roy et al. ACS Omega. 2019; 4(16):16774-16780. DOI: 10.1021/acsomega.9b01512
28	S(CC1=C(C(=O)O)N2C(=O)[C@H](NC(=O)/C(=N/OC)/c3nc(N)sc3)[C@H]2SC1)c1n(C)nnn1	12763167	0	Roy et al. ACS Omega. 2019; 4(16):16774-16780. DOI: 10.1021/acsomega.9b01512
29	S(CC1=C(C(=O)O)N2C(=O)[C@H](NC(=O)/C(=N/OC)/c3nc(N)sc3)[C@H]2SC1)C=1N(C)NC(=O)C(=O)N=1	15817796	0	Roy et al. ACS Omega. 2019; 4(16):16774-16780. DOI: 10.1021/acsomega.9b01512
30	S(CC1=C(C(=O)O)N2C(=O)[C@H](NC(=O)/C(=N/OC)/c3nc(N)sc3)[C@@H]2SC1)c1snnc1	88600140	0	Roy et al. ACS Omega. 2019; 4(16):16774-16780. DOI: 10.1021/acsomega.9b01512
31	S(CC1=C(C(=O)O)N2C(=O)[C@](OC)(NC(=O)C3S/C(=C(/C(=O)O)\C#N)/S3)[C@H]2SC1)c1n(C)nnn1	NA	0	Roy et al. ACS Omega. 2019; 4(16):16774-16780. DOI: 10.1021/acsomega.9b01512
32	S(CC1=C(C(=O)O)N2C(=O)[C@@H](NC(=O)Cn3nnnc3)[C@@H]2SC1)c1scnn1	40467099	0	Roy et al. ACS Omega. 2019; 4(16):16774-16780. DOI: 10.1021/acsomega.9b01512
33	S(CC1=C(C(=O)O)N2C(=O)[C@@H](NC(=O)Cc3sccc3)[C@@H]2SC1)C1=NCNN1	NA	0	Roy et al. ACS Omega. 2019; 4(16):16774-16780. DOI: 10.1021/acsomega.9b01512
34	S(CC1=C(C(=O)O)N2C(=O)[C@@H](NC(=O)Cc3nc(N)sc3)[C@@H]2SC1)c1n(CCN(C)C)nnn1	6604465	0	Roy et al. ACS Omega. 2019; 4(16):16774-16780. DOI: 10.1021/acsomega.9b01512
35	S(CC1=C(C(=O)O)N2C(=O)[C@@H](NC(=O)Cc3c(CN)cccc3)[C@@H]2SC1)c1n(CC(=O)O)nnn1	6604420	0	Roy et al. ACS Omega. 2019; 4(16):16774-16780. DOI: 10.1021/acsomega.9b01512
36	S(CC1=C(C(=O)O)N2C(=O)[C@@H](NC(=O)[C@H](NC(=O)c3c(O)cc(C)nc3)c3ccc(O)cc3)[C@@H]2SC1)c1n(C)nnn1	92402788	0	Roy et al. ACS Omega. 2019; 4(16):16774-16780. DOI: 10.1021/acsomega.9b01512
37	S(CC1=C(C(=O)O)N2C(=O)[C@@H](NC(=O)[C@H](N)c3ccc(O)cc3)[C@@H]2SC1)c1nn[nH]c1	42066941	0	Roy et al. ACS Omega. 2019; 4(16):16774-16780. DOI: 10.1021/acsomega.9b01512
38	S(CC1=C(C(=O)O)N2C(=O)[C@@H](NC(=O)[C@@H](O)c3ccccc3)[C@H]2SC1)c1sc(C)nn1	22791966	0	Roy et al. ACS Omega. 2019; 4(16):16774-16780. DOI: 10.1021/acsomega.9b01512
39	S(CC1=C(C(=O)O)N2C(=O)[C@@](OC)(NC(=O)[C@@H](C(=O)O)c3ccc(O)cc3)[C@@H]2OC1)c1n(C)nnn1	NA	0	Roy et al. ACS Omega. 2019; 4(16):16774-16780. DOI: 10.1021/acsomega.9b01512
40	S(CC[C@@H](NC(=O)C)C(=O)Oc1ccc(NC(=O)C)cc1)C	53832858	1	Roy et al. ACS Omega. 2019; 4(16):16774-16780. DOI: 10.1021/acsomega.9b01512
41	S(CC)[C@]1(SC)[C@@]2(C)[C@@H]([C@@H]3[C@@](F)([C@@H](O)C2)[C@@]2(C)C(=CC(=O)C=C2)CC3)CC1	NA	1	Roy et al. ACS Omega. 2019; 4(16):16774-16780. DOI: 10.1021/acsomega.9b01512
42	S(CC(=O)N[C@H]1C(=O)N2[C@H](C(=O)O)C(C)(C)S[C@H]12)c1ccccc1	NA	0	Roy et al. ACS Omega. 2019; 4(16):16774-16780. DOI: 10.1021/acsomega.9b01512
43	S(CC(=O)N[C@@H]1C(=O)N2C(C(=O)O)=C(COC(=O)C)CS[C@H]12)c1ccncc1	30699	0	Roy et al. ACS Omega. 2019; 4(16):16774-16780. DOI: 10.1021/acsomega.9b01512
44	S(CC(=O)N[C@@H]1C(=O)N2[C@H](C(=O)O)C(C)(C)S[C@@H]12)CC=C	92170492	0	Roy et al. ACS Omega. 2019; 4(16):16774-16780. DOI: 10.1021/acsomega.9b01512
45	S(CC#N)CC(=O)N[C@]1(OC)C(=O)N2C(C(=O)O)=C(CSc3n(C)nnn3)CS[C@@H]12	12784852	0	Roy et al. ACS Omega. 2019; 4(16):16774-16780. DOI: 10.1021/acsomega.9b01512
46	S(C[C@H]1CN(CCC)[C@H]2[C@@H](c3c4c([nH]cc4C2)ccc3)C1)C	47811	1	Roy et al. ACS Omega. 2019; 4(16):16774-16780. DOI: 10.1021/acsomega.9b01512
47	S(C[C@H](NC(=O)c1c(C)c(O)ccc1)[C@H](O)CN1[C@H](C(=O)NC(C)C)C[C@H]2[C@@H](C1)CCCC2)c1ccccc1	NA	0	Roy et al. ACS Omega. 2019; 4(16):16774-16780. DOI: 10.1021/acsomega.9b01512
48	S(C[C@H](N)C(=O)O)CC(=O)N[C@@]1(OC)C(=O)N2C(C(=O)O)=C(CSc3n(C)nnn3)CS[C@H]12	92209762	0	Roy et al. ACS Omega. 2019; 4(16):16774-16780. DOI: 10.1021/acsomega.9b01512
49	S(C[C@@H]1C=C2[C@@H](N(C)C1)Cc1c3c([nH]c1)cccc23)c1ncccc1	23955947	1	Roy et al. ACS Omega. 2019; 4(16):16774-16780. DOI: 10.1021/acsomega.9b01512
50	S(C[C@@H](NC(=O)c1c(C)c(O)ccc1)[C@@H](O)CN1[C@@H](C(=O)NC(C)(C)C)C[C@@H]2[C@@H](C1)CCCC2)c1ccccc1	NA	0	Roy et al. ACS Omega. 2019; 4(16):16774-16780. DOI: 10.1021/acsomega.9b01512
51	S(C)c1ccc(CC(=O)N2[C@@H](CN3C[C@H](O)CC3)CN(C(=O)C)CC2)cc1	44310513	0	Roy et al. ACS Omega. 2019; 4(16):16774-16780. DOI: 10.1021/acsomega.9b01512
52	S(C)c1cc2N(CC[C@H]3NCCCC3)c3c(Sc2cc1)cccc3	76968993	0	Roy et al. ACS Omega. 2019; 4(16):16774-16780. DOI: 10.1021/acsomega.9b01512
53	S(C)c1cc2N(CC[C@H]3N(C)CCCC3)c3c(Sc2cc1)cccc3	12444300	1	Roy et al. ACS Omega. 2019; 4(16):16774-16780. DOI: 10.1021/acsomega.9b01512
54	S(C)c1cc2N(C[C@H](CN(C)C)C)c3c(Sc2cc1)cccc3	70691443	1	Roy et al. ACS Omega. 2019; 4(16):16774-16780. DOI: 10.1021/acsomega.9b01512
55	S(C)c1cc2[C@@H](N3CCN(C)CC3)Cc3c(Sc2cc1)cccc3	7059581	1	Roy et al. ACS Omega. 2019; 4(16):16774-16780. DOI: 10.1021/acsomega.9b01512
56	S(C)[C@H]1[C@@H](O)[C@H](O)[C@@H](O)[C@H]([C@H](NC(=O)[C@@H]2N(C)C[C@@H](CCC)C2)[C@@H](O)C)O1	NA	0	Roy et al. ACS Omega. 2019; 4(16):16774-16780. DOI: 10.1021/acsomega.9b01512
57	S(C(F)F)CC(=O)N[C@]1(OC)C(=O)N2C(C(=O)O)=C(CSc3n(CCO)nnn3)CO[C@@H]12	124303469	0	Roy et al. ACS Omega. 2019; 4(16):16774-16780. DOI: 10.1021/acsomega.9b01512
58	S(C(F)(F)F)CC(=O)N[C@@H]1C(=O)N2C(C(=O)O)=C(CSc3n(C)nnn3)CS[C@@H]12	92403441	0	Roy et al. ACS Omega. 2019; 4(16):16774-16780. DOI: 10.1021/acsomega.9b01512
59	S(C(CNc1c([N+](=O)[O-])cc[nH]1)(C)C)C(C)(C)c1nc(C)c(C)c(C)c1	NA	1	Roy et al. ACS Omega. 2019; 4(16):16774-16780. DOI: 10.1021/acsomega.9b01512
60	S(C(=O)OCC)/C(=C(/N(C=O)Cc1c(N)nc(C)nc1)\C)/CCOC(=O)OCC	5353523	1	Roy et al. ACS Omega. 2019; 4(16):16774-16780. DOI: 10.1021/acsomega.9b01521
61	S(C(=O)c1occc1)CC1=C(C(=O)O)N2C(=O)[C@H](NC(=O)/C(=N/OC)/c3nc(N)sc3)[C@H]2SC1	92169538	0	Roy et al. ACS Omega. 2019; 4(16):16774-16780. DOI: 10.1021/acsomega.9b01512
62	S(C(=O)C)C[C@H](C(=O)NCC(=O)OCc1ccccc1)Cc1ccccc1	60561	1	Roy et al. ACS Omega. 2019; 4(16):16774-16780. DOI: 10.1021/acsomega.9b01512
63	S(C(=O)C(C)(C)C)CC(=O)[C@@]1(O)[C@@]2(C)[C@H]([C@H]3[C@H]([C@@H](O)C2)[C@@]2(C)C(=CC(=O)CC2)CC3)CC1	NA	1	Roy et al. ACS Omega. 2019; 4(16):16774-16780. DOI: 10.1021/acsomega.9b01512
64	S(C(=O)[C@]1(OC(=O)CC)[C@@H](C)C[C@H]2[C@@]1(C)C[C@H](O)[C@@]1(F)[C@@]3(C)C([C@H](F)C[C@H]21)=CC(=O)C=C3)CF	NA	1	Roy et al. ACS Omega. 2019; 4(16):16774-16780. DOI: 10.1021/acsomega.9b01512
65	S(C(=O)[C@]1(OC(=O)CC)[C@@H](C)C[C@H]2[C@@]1(C)C[C@H](O)[C@@]1(F)[C@@]3(C)C([C@H](F)C[C@H]21)=CC(=O)C=C3)C	NA	1	Roy et al. ACS Omega. 2019; 4(16):16774-16780. DOI: 10.1021/acsomega.9b01512
66	S(C(=O)[C@]1(OC(=O)C)[C@@H](C)C[C@H]2[C@@]1(C)C[C@H](O)[C@@]1(F)[C@@]3(C)C(=CC(=O)C=C3)CC[C@H]21)C	NA	1	Roy et al. ACS Omega. 2019; 4(16):16774-16780. DOI: 10.1021/acsomega.9b01512
67	S(C(=O)[C@]1(O)[C@H](C)C[C@H]2[C@@]1(C)C[C@H](O)[C@@]1(F)[C@@]3(C)C([C@H](F)C[C@H]21)=CC(=O)C=C3)CF	NA	1	Roy et al. ACS Omega. 2019; 4(16):16774-16780. DOI: 10.1021/acsomega.9b01512
68	S(C(=O)[C@@]1(O)[C@@H](C)C[C@@H]2[C@]1(C)C[C@@H](O)[C@]1(F)[C@]3(C)C(=CC(=O)C=C3)CC[C@@H]21)C	NA	1	Roy et al. ACS Omega. 2019; 4(16):16774-16780. DOI: 10.1021/acsomega.9b01512
69	S(=O)(=O)(ON1C(=O)[C@@H](NC/C(=N\OCC(=O)O)/c2nc(N)sc2)C1(C)C)O	NA	0	Roy et al. ACS Omega. 2019; 4(16):16774-16780. DOI: 10.1021/acsomega.9b01512
70	S(=O)(=O)(OC[C@]12OC(C)(C)O[C@@H]1[C@H]1OC(C)(C)O[C@H]1CO2)N	NA	1	Roy et al. ACS Omega. 2019; 4(16):16774-16780. DOI: 10.1021/acsomega.9b01512
71	S(=O)(=O)(O)N1[C@H](C)[C@H](NC(=O)/C(=N\OC(C(=O)O)(C)C)/c2nc(N)sc2)C1=O	86741379	0	Roy et al. ACS Omega. 2019; 4(16):16774-16780. DOI: 10.1021/acsomega.9b01512
72	S(=O)(=O)(O)N1[C@@H](COC(=O)N)[C@@H](NC(=O)/C(=N\OCC(=O)O)/c2nc(N)sc2)C1=O	118987211	0	Roy et al. ACS Omega. 2019; 4(16):16774-16780. DOI: 10.1021/acsomega.9b01512
73	S(=O)(=O)(O)N[C@@H](C(=O)N[C@H]1C(=O)N2[C@@H](C(=O)O)C(C)(C)S[C@@H]12)c1ccccc1	73952099	0	Roy et al. ACS Omega. 2019; 4(16):16774-16780. DOI: 10.1021/acsomega.9b01512
74	S(=O)(=O)(O)Cn1c(SCC2=C(C(=O)O)N3C(=O)[C@@H](NC(=O)[C@@H](O)c4ccccc4)[C@H]3SC2)nnn1	56840883	0	Roy et al. ACS Omega. 2019; 4(16):16774-16780. DOI: 10.1021/acsomega.9b01512
75	S(=O)(=O)(O)CCC1C=CN(CC2=C(C(=O)O)N3C(=O)[C@@H](NC(=O)[C@H](NC(=O)c4c(C(=O)O)[nH]cn4)c4ccccc4)[C@@H]3SC2)C=C1	NA	0	Roy et al. ACS Omega. 2019; 4(16):16774-16780. DOI: 10.1021/acsomega.9b01512
76	S(=O)(=O)(O)CCC[N+]1([C-H2])[C@@H]2CC(OC(=O)[C@@H](CO)c3ccccc3)C[C@@H]1CC2	NA	0	Roy et al. ACS Omega. 2019; 4(16):16774-16780. DOI: 10.1021/acsomega.9b01512
77	S(=O)(=O)(O)c1cc(C(=O)OCC(=O)[C@]2(O)[C@H](C)C[C@@H]3[C@@]2(C)C[C@H](O)[C@H]2[C@@]4(C)C(C(C)=C[C@@H]32)=Cc2n(-c3ccccc3)ncc2C4)ccc1	NA	1	Roy et al. ACS Omega. 2019; 4(16):16774-16780. DOI: 10.1021/acsomega.9b01512
78	S(=O)(=O)(O)[C@H](C(=O)N[C@H]1C(=O)N2[C@@H](C(=O)O)[C@@H](CN3C=CC(C(=O)N)C=C3)CS[C@H]12)c1ccccc1	NA	0	Roy et al. ACS Omega. 2019; 4(16):16774-16780. DOI: 10.1021/acsomega.9b01512
79	S(=O)(=O)(O)[C@@H](C(=O)N[C@@H]1C(=O)N2[C@H](C(=O)O)C(C)(C)S[C@H]12)c1ccccc1	92210019	0	Roy et al. ACS Omega. 2019; 4(16):16774-16780. DOI: 10.1021/acsomega.9b01512
80	S(=O)(=O)(Nc1ccc([C@H](O)CNC(C)C)cc1)C	119259	1	Roy et al. ACS Omega. 2019; 4(16):16774-16780. DOI: 10.1021/acsomega.9b01512
81	S(=O)(=O)(Nc1cc([C@@H](N)C(=O)N[C@@H]2C(=O)N3C(C(=O)O)=C(C)CS[C@@H]23)ccc1)C	NA	0	Roy et al. ACS Omega. 2019; 4(16):16774-16780. DOI: 10.1021/acsomega.9b01512
82	S(=O)(=O)(NC)c1c(N)cc(OC)c(C(=O)NC[C@H]2N(CC=C)CCC2)c1	76971675	1	Roy et al. ACS Omega. 2019; 4(16):16774-16780. DOI: 10.1021/acsomega.9b01512
83	S(=O)(=O)(N[C@H](N)CCSCc1nc(N[C-]([N+H3])N)sc1)N	NA	1	Roy et al. ACS Omega. 2019; 4(16):16774-16780. DOI: 10.1021/acsomega.9b01512
84	S(=O)(=O)(N)c1ccc(Nc2nc(O)c(NC(=O)N[C@H](C(=O)N[C@H]3C(=O)N4[C@H](C(=O)O)C(C)(C)S[C@@H]34)c3ccc(O)cc3)cn2)cc1	NA	0	Roy et al. ACS Omega. 2019; 4(16):16774-16780. DOI: 10.1021/acsomega.9b01512
85	S(=O)(=O)(N)c1cc(OC)c(OC)c(C(=O)NC[C@@H]2N(CC=C)CCC2)c1	969473	1	Roy et al. ACS Omega. 2019; 4(16):16774-16780. DOI: 10.1021/acsomega.9b01512
86	S(=O)(=O)(N)c1cc(C(=O)NC[C@H]2N(CCC)CCC2)c(OC)cc1	76970760	1	Roy et al. ACS Omega. 2019; 4(16):16774-16780. DOI: 10.1021/acsomega.9b01512
87	S(=O)(=O)(N)c1cc(C(=O)NC[C@H]2N(CC)CCC2)c(OC)cc1	688272	1	Roy et al. ACS Omega. 2019; 4(16):16774-16780. DOI: 10.1021/acsomega.9b01512
88	S(=O)(=O)(N)c1cc(C(=O)NC[C@@H]2N(Cc3ccc(F)cc3)CCC2)c(OC)cc1	76968493	1	Roy et al. ACS Omega. 2019; 4(16):16774-16780. DOI: 10.1021/acsomega.9b01512
89	S(=O)(=O)(N)c1cc(C(=O)NC[C@@H]2N(C)CCC2)c(OC)cc1	76967183	1	Roy et al. ACS Omega. 2019; 4(16):16774-16780. DOI: 10.1021/acsomega.9b01512
90	S(=O)(=O)(N(CCO)CCO)c1ccc(C=2NC(=O)C(C(=O)N[C@@H](C(=O)N[C@H]3C(=O)N4[C@@H](C(=O)O)C(C)(C)S[C@H]34)c3ccc(O)cc3)=CC=2)cc1	NA	0	Roy et al. ACS Omega. 2019; 4(16):16774-16780. DOI: 10.1021/acsomega.9b01512
91	S(=O)(=O)(N(CC)CC)N[C@H]1CN(CCC)[C@@H]2[C@H](C1)Cc1c(O)cccc1C2	124389587	1	Roy et al. ACS Omega. 2019; 4(16):16774-16780. DOI: 10.1021/acsomega.9b01512
92	S(=O)(=O)(N(CC)CC)N[C@H]1CN(C)[C@@H]2[C@@H](c3c4c([nH]cc4C2)ccc3)C1	NA	1	Roy et al. ACS Omega. 2019; 4(16):16774-16780. DOI: 10.1021/acsomega.9b01512
93	S(=O)(=O)(N(C)C)N[C@H]1CN(C)[C@H]2[C@@H](c3c4c(n(C)cc4C2)ccc3)C1	124356113	1	Roy et al. ACS Omega. 2019; 4(16):16774-16780. DOI: 10.1021/acsomega.9b01512
94	S(=O)(=O)(N(C)C)c1cc2/C(=C/CCN3CCN(C)CC3)/c3c(Sc2cc1)cccc3	941650	1	Roy et al. ACS Omega. 2019; 4(16):16774-16780. DOI: 10.1021/acsomega.9b01512
95	S(=O)(=O)(CC)c1cc(C(=O)NC[C@@H]2N(CC)CCC2)c(OC)cc1	25273604	1	Roy et al. ACS Omega. 2019; 4(16):16774-16780. DOI: 10.1021/acsomega.9b01512
96	S(=O)(=O)(CC)c1c(N)cc(OC)c(C(=O)NC[C@H]2N(CC)CCC2)c1	3055076	1	Roy et al. ACS Omega. 2019; 4(16):16774-16780. DOI: 10.1021/acsomega.9b01512
97	S(=O)(=O)(C)N1C(=O)N(C(=O)N[C@@H](C(=O)N[C@@H]2C(=O)N3[C@@H](C(=O)O)C(C)(C)S[C@H]23)c2ccccc2)CC1	656511	0	Roy et al. ACS Omega. 2019; 4(16):16774-16780. DOI: 10.1021/acsomega.9b01512
98	S(=O)(=O)(C)c1ccc(CC(=O)N2[C@@H](CN3C[C@@H](O)CC3)CN(C(=O)C)CC2)cc1	44310651	0	Roy et al. ACS Omega. 2019; 4(16):16774-16780. DOI: 10.1021/acsomega.9b01512
99	S(=O)(=O)(C)c1cc2N(CC[C@H]3N(C)CCCC3)c3c(Sc2cc1)cccc3	76962996	1	Roy et al. ACS Omega. 2019; 4(16):16774-16780. DOI: 10.1021/acsomega.9b01512
100	S([C@H]1C[C@@H](C(=O)N(C)C)NC1)C=1[C@@H](C)[C@@H]2[C@H]([C@@H](O)C)C(=O)N2C=1C(=O)O	124762017	0	Roy et al. ACS Omega. 2019; 4(16):16774-16780. DOI: 10.1021/acsomega.9b01512
101	S([C@H](c1ccc(SCCCC)cc1)c1ccccc1)CCN(C)C	76959959	1	Roy et al. ACS Omega. 2019; 4(16):16774-16780. DOI: 10.1021/acsomega.9b01512
102	S([C@@H]1CN2[N@](C1)CN=C2)C=1[C@@H](C)[C@H]2[C@H]([C@H](O)C)C(=O)N2C=1C(=O)O	NA	0	Roy et al. ACS Omega. 2019; 4(16):16774-16780. DOI: 10.1021/acsomega.9b01512
103	S([C@@H]1CN([C-]([N+H3])N)CC1)C1=C(C(=O)O)N2C(=O)[C@@H]([C@H](O)C)[C@H]2C1	NA	0	Roy et al. ACS Omega. 2019; 4(16):16774-16780. DOI: 10.1021/acsomega.9b01512
104	S([C@@H]1C[C@H]([C@@H](O)CCNC)NC1)C=1[C@@H](C)[C@@H]2[C@H]([C@H](O)C)C(=O)N2C=1C(=O)O	NA	0	Roy et al. ACS Omega. 2019; 4(16):16774-16780. DOI: 10.1021/acsomega.9b01512
105	S(/C=C/C1=C(C(=O)O)N2C(=O)[C@@H](NC(=O)/C(=N/OC)/c3nc(N)sc3)[C@@H]2SC1)C=1N(CC=O)C(=O)C(=O)NN=1	NA	0	Roy et al. ACS Omega. 2019; 4(16):16774-16780. DOI: 10.1021/acsomega.9b01512
106	S(/C=C/C#N)CC(=O)N[C@H]1C(=O)N2C(C(=O)O)=C(CSc3n(C)nnn3)CS[C@H]12	NA	0	Roy et al. ACS Omega. 2019; 4(16):16774-16780. DOI: 10.1021/acsomega.9b01512
107	S(/C(=C(/N(C=O)Cc1c(N)nc(C)nc1)\C)/CCOP(=O)(O)O)C(=O)c1ccccc1	5282168	1	Roy et al. ACS Omega. 2019; 4(16):16774-16780. DOI: 10.1021/acsomega.9b01512
108	S(/C(=C(/N(C=O)Cc1c(N)nc(C)nc1)\C)/CCOC(=O)c1ccccc1)C(=O)c1ccccc1	6100722	1	Roy et al. ACS Omega. 2019; 4(16):16774-16780. DOI: 10.1021/acsomega.9b01512
109	S(/C(=C(/N(C=O)Cc1c(N)nc(C)nc1)\C)/CCOC(=O)C)C(=O)C	5748361	1	Roy et al. ACS Omega. 2019; 4(16):16774-16780. DOI: 10.1021/acsomega.9b01512
110	P(C(=O)O)(=O)(O)O	3415	1	Zhao et al. J Chem Inf Model. 2007;47(1):170–175. DOI:10.1021/ci600312d
111	P(=O)(O)(O)[C@H]1[C@H](C)O1	6604158	1	Roy et al. ACS Omega. 2019; 4(16):16774-16780. DOI: 10.1021/acsomega.9b01512
112	OP(O)(=O)OCC(Cl)(Cl)Cl	5563	1	Zhao et al. J Chem Inf Model. 2007;47(1):170–175. DOI:10.1021/ci600312d
113	OP(O)(=O)CN1C(=O)NC(C1=O)(c2ccccc2)c3ccccc3	68746558	1	Zhao et al. J Chem Inf Model. 2007;47(1):170–175. DOI:10.1021/ci600312d
114	ONN	15568012	1	Roy et al. ACS Omega. 2019; 4(16):16774-16780. DOI: 10.1021/acsomega.9b01512
115	OCCOCCOCCN1CCN(CC1)C(c2ccccc2)c3ccc(Cl)cc3	63345	1	Zhao et al. J Chem Inf Model. 2007;47(1):170–175. DOI:10.1021/ci600312d
116	OCCOCCN1CCN(CC1)C3=Nc2ccccc2Sc4ccccc34	5002	1	Zhao et al. J Chem Inf Model. 2007;47(1):170–175. DOI:10.1021/ci600312d
117	OCCOCCN1CCN(CC1)C(c2ccccc2)c3ccc(Cl)cc3	3658	1	Zhao et al. J Chem Inf Model. 2007;47(1):170–175. DOI:10.1021/ci600312d
118	OCCOC4CCN(CCCN2c1ccccc1Sc3ccc(cc23)C(F)(F)F)CC4	218089	1	Zhao et al. J Chem Inf Model. 2007;47(1):170–175. DOI:10.1021/ci600312d
119	OCCOC(=O)NCc1ccccc1	20787	1	Zhao et al. J Chem Inf Model. 2007;47(1):170–175. DOI:10.1021/ci600312d
120	OCCN4CCN(CCCN2c1ccccc1Sc3ccc(Cl)cc23)CC4	4748	1	Zhao et al. J Chem Inf Model. 2007;47(1):170–175. DOI:10.1021/ci600312d
121	OCCN4CCN(CCCN2c1ccccc1Sc3ccc(cc23)C(F)(F)F)CC4	3372	1	Zhao et al. J Chem Inf Model. 2007;47(1):170–175. DOI:10.1021/ci600312d
122	OCCN4CCN(CCCN2c1ccccc1Sc3cc(Cl)cnc23)CC4	65615	1	Zhao et al. J Chem Inf Model. 2007;47(1):170–175. DOI:10.1021/ci600312d
123	OCCN4CCN(CCCN2c1ccccc1C=Cc3ccccc23)CC4	9417	1	Zhao et al. J Chem Inf Model. 2007;47(1):170–175. DOI:10.1021/ci600312d
124	OCCN4CCN(CCCN2c1cc(ccc1Sc3sccc23)C(F)(F)F)CC4	219071	1	Zhao et al. J Chem Inf Model. 2007;47(1):170–175. DOI:10.1021/ci600312d
125	OCCN4CCN(CCCC2c1ccc(F)cc1Sc3ccc(cc23)C(F)(F)F)CC4	68751	1	Zhao et al. J Chem Inf Model. 2007;47(1):170–175. DOI:10.1021/ci600312d
126	OCCN4CCN(CCC=C2c1ccccc1Sc3ccc(Cl)cc23)CC4	12454	1	Zhao et al. J Chem Inf Model. 2007;47(1):170–175. DOI:10.1021/ci600312d
127	OCCN4CCN(CCC=C2c1ccccc1Sc3ccc(cc23)C(F)(F)F)CC4	17012	1	Zhao et al. J Chem Inf Model. 2007;47(1):170–175. DOI:10.1021/ci600312d
128	OCCN4CCN(CCC=C2c1ccccc1COc3ccc(Cl)cc23)CC4	26390	1	Zhao et al. J Chem Inf Model. 2007;47(1):170–175. DOI:10.1021/ci600312d
129	OCCN4CCN(CC/C=C2/C1=CC=CC=C1COC3=C/C=C(/[Cl])C=C23)CC4	6436541	1	Shen et al. J Chem Inf Model. 2010;50(6):1034-1041. DOI: 10.1021/ci100104j
130	OCCN4CCCN(CCCN2c1ccccc1Sc3ccc(cc23)C(F)(F)F)CC4	19687	1	Zhao et al. J Chem Inf Model. 2007;47(1):170–175. DOI:10.1021/ci600312d
131	OCCN4CCCN(CCCN2c1ccccc1C=Cc3ccccc23)CC4	3042817	1	Zhao et al. J Chem Inf Model. 2007;47(1):170–175. DOI:10.1021/ci600312d
132	OCCN3C(=O)CN1CCOC1(c2ccccc2F)c4cc(Cl)ccc34	3398	1	Zhao et al. J Chem Inf Model. 2007;47(1):170–175. DOI:10.1021/ci600312d
133	OCCN2C(=O)C(O)N=C(c1ccccc1F)c3cc(Cl)ccc23	38668	1	Zhao et al. J Chem Inf Model. 2007;47(1):170–175. DOI:10.1021/ci600312d
134	OCCN1CCN(CC1)CCC(=O)N3c2ccccc2Sc4ccc(cc34)C(F)(F)F	219081	1	Zhao et al. J Chem Inf Model. 2007;47(1):170–175. DOI:10.1021/ci600312d
135	OCCN1CCN(CC1)C3CC(c2ccc(F)cc2)c4ccc(cc34)C(F)(F)F	4913274	1	Zhao et al. J Chem Inf Model. 2007;47(1):170–175. DOI:10.1021/ci600312d
136	OCCN1CCN(CC1)[C@@]3([H])C[C@@]([H])(C2=C/C=C(/[F])C=C2)C4=CC=C(C=C34)C([F])([F])[F]	71240	1	Shen et al. J Chem Inf Model. 2010;50(6):1034-1041. DOI: 10.1021/ci100104j
137	OCCN(CCO)c4nc(N1CCCCC1)c3nc(nc(N2CCCCC2)c3n4)N(CCO)CCO	3108	0	Zhao et al. J Chem Inf Model. 2007;47(1):170–175. DOI:10.1021/ci600312d
138	OCCCN4CCN(CCCC2c1ccccc1Sc3ccc(Cl)cc23)CC4	28361	1	Zhao et al. J Chem Inf Model. 2007;47(1):170–175. DOI:10.1021/ci600312d
139	OCCC4CCN(CCC=C2c1ccc(F)cc1Sc3ccc(cc23)C(F)(F)F)CC4	68714	1	Zhao et al. J Chem Inf Model. 2007;47(1):170–175. DOI:10.1021/ci600312d
140	OCC2OC(Oc1ccccc1CO)C(O)C(O)C2O	5145	1	Zhao et al. J Chem Inf Model. 2007;47(1):170–175. DOI:10.1021/ci600312d
141	OCC1OC(CC1O)n2cnc3C(O)CNC=Nc23	4739	1	Zhao et al. J Chem Inf Model. 2007;47(1):170–175. DOI:10.1021/ci600312d
142	OCc1ccccc1	244	1	Zhao et al. J Chem Inf Model. 2007;47(1):170–175. DOI:10.1021/ci600312d
143	OCC1CCC(O1)n2cnc3c(=O)[nH]cnc23	135422442	0	Zhao et al. J Chem Inf Model. 2007;47(1):170–175. DOI:10.1021/ci600312d
144	OCC1(CO)COC(OC1)C(Cl)(Cl)Cl	71839	1	Zhao et al. J Chem Inf Model. 2007;47(1):170–175. DOI:10.1021/ci600312d
145	OCC(O)CN2C(=O)CN=C(c1ccccc1F)c3cc(Cl)ccc23	3050433	1	Zhao et al. J Chem Inf Model. 2007;47(1):170–175. DOI:10.1021/ci600312d
146	OCC(O)C2OC1OC(OC1C2O)C(Cl)(Cl)Cl	85991	1	Zhao et al. J Chem Inf Model. 2007;47(1):170–175. DOI:10.1021/ci600312d
147	OCC(O)C1OC(=O)C(=C1O)O	54676860	1	Zhao et al. J Chem Inf Model. 2007;47(1):170–175. DOI:10.1021/ci600312d
148	OCC(O)C(O)C(O)C(O)CO	453	0	Zhao et al. J Chem Inf Model. 2007;47(1):170–175. DOI:10.1021/ci600312d
149	OCC(NC(=O)C(Cl)Cl)C(O)c1ccc(cc1)N(=O)=O	298	1	Zhao et al. J Chem Inf Model. 2007;47(1):170–175. DOI:10.1021/ci600312d
150	OCC(N)(CO)CO	6503	0	Roy et al. ACS Omega. 2019; 4(16):16774-16780. DOI: 10.1021/acsomega.9b01512
151	OCC(C)(CO)C=1ON=C(N=1)C=4N=CN3C=2C=C/C=C(/[Cl])C=2C(=O)N(C)CC3=4	NA	0	Shen et al. J Chem Inf Model. 2010;50(6):1034-1041. DOI: 10.1021/ci100104j
152	OCC(Br)(Br)Br	6400	1	Zhao et al. J Chem Inf Model. 2007;47(1):170–175. DOI:10.1021/ci600312d
153	Oc5ccc4CC2C1CCOCC1(CCN2CC3CC3)c4c5	13559474	1	Zhao et al. J Chem Inf Model. 2007;47(1):170–175. DOI:10.1021/ci600312d
154	Oc5ccc4CC2C1CCCCC1(CCN2CCc3ccccc3)c4c5	521204	1	Zhao et al. J Chem Inf Model. 2007;47(1):170–175. DOI:10.1021/ci600312d
155	Oc5ccc4CC2C1CCCCC1(CCN2CC(=O)c3ccccc3)c4c5	517743	1	Zhao et al. J Chem Inf Model. 2007;47(1):170–175. DOI:10.1021/ci600312d
156	Oc4cccc5CC2C1CCC(=O)CC1(CCN2CC3CC3)c45	44281266	1	Zhao et al. J Chem Inf Model. 2007;47(1):170–175. DOI:10.1021/ci600312d
157	Oc4ccc3CC2C1CCCCC1(CCN2CC=C)c3c4	3912	1	Zhao et al. J Chem Inf Model. 2007;47(1):170–175. DOI:10.1021/ci600312d
158	Oc4ccc3CC1NCCC2(CCCCC12)c3c4	519103	1	Zhao et al. J Chem Inf Model. 2007;47(1):170–175. DOI:10.1021/ci600312d
159	Oc4ccc3CC1N(CCC2(CCCCC12O)c3c4)CC5CCC5	2487	1	Zhao et al. J Chem Inf Model. 2007;47(1):170–175. DOI:10.1021/ci600312d
160	Oc4ccc3CC1N(CCC2(CCCCC12O)c3c4)CC5CC5	13080266	1	Zhao et al. J Chem Inf Model. 2007;47(1):170–175. DOI:10.1021/ci600312d
161	Oc4ccc3[nH]cc(CCCCN1CCC(=CC1)c2ccccc2)c3c4	219050	1	Zhao et al. J Chem Inf Model. 2007;47(1):170–175. DOI:10.1021/ci600312d
162	Oc4ccc(CCNC(=O)C23CC1CC(CC(C1)C2)C3)cc4O	38361	1	Zhao et al. J Chem Inf Model. 2007;47(1):170–175. DOI:10.1021/ci600312d
163	OC4=C(C1CCC(CC1)c2ccc(Cl)cc2)C(=O)c3ccccc3C4=O	74989	0	Zhao et al. J Chem Inf Model. 2007;47(1):170–175. DOI:10.1021/ci600312d
164	OC4(CCN(CCCN2c1ccccc1Sc3ccc(Cl)cc23)CC4)C5CCOC5=O	219083	1	Zhao et al. J Chem Inf Model. 2007;47(1):170–175. DOI:10.1021/ci600312d
165	OC3N=C(c1ccccc1Cl)c2nc(Cl)ccc2NC3=O	68672	1	Zhao et al. J Chem Inf Model. 2007;47(1):170–175. DOI:10.1021/ci600312d
166	OC3N=C(c1ccccc1Cl)c2cc(Cl)ccc2NC3=O	3958	1	Zhao et al. J Chem Inf Model. 2007;47(1):170–175. DOI:10.1021/ci600312d
167	OC3N=C(c1ccccc1)c2cc(Cl)ccc2NC3=O	4616	1	Zhao et al. J Chem Inf Model. 2007;47(1):170–175. DOI:10.1021/ci600312d
168	OC3(CCN(CCCC(c1ccc(F)cc1)c2ccc(F)cc2)CC3)c4ccc(Cl)c(c4)C(F)(F)F	33630	1	Zhao et al. J Chem Inf Model. 2007;47(1):170–175. DOI:10.1021/ci600312d
169	Oc2ccc(C=C(C#N)C(=Cc1ccc(O)cc1)C#N)cc2	NA	0	Zhao et al. J Chem Inf Model. 2007;47(1):170–175. DOI:10.1021/ci600312d
170	OC2(N1CCN=C1c3ccccc23)c4ccc(Cl)cc4	4020	1	Zhao et al. J Chem Inf Model. 2007;47(1):170–175. DOI:10.1021/ci600312d
171	OC2(CCN(CCCC(=O)c1ccc(F)cc1)CC2)c3cccc(c3)C(F)(F)F	5567	1	Zhao et al. J Chem Inf Model. 2007;47(1):170–175. DOI:10.1021/ci600312d
172	OC2(CCN(CCCC(=O)c1ccc(F)cc1)CC2)c3ccc(Cl)cc3	3559	1	Zhao et al. J Chem Inf Model. 2007;47(1):170–175. DOI:10.1021/ci600312d
173	OC2(CCN(CCCC(=O)c1ccc(F)cc1)CC2)c3ccc(Cl)c(c3)C(F)(F)F	25293	1	Zhao et al. J Chem Inf Model. 2007;47(1):170–175. DOI:10.1021/ci600312d
174	OC2(CCN(CCCC(=O)c1ccc(F)cc1)CC2)c3ccc(Br)cc3	2448	1	Zhao et al. J Chem Inf Model. 2007;47(1):170–175. DOI:10.1021/ci600312d
175	OC2(C1=NCCCN1c3ccccc23)c4ccccc4Cl	5311045	1	Zhao et al. J Chem Inf Model. 2007;47(1):170–175. DOI:10.1021/ci600312d
176	OC1OC(COCCOC(O)C(Cl)(Cl)Cl)C(OC2OC(COCCOCCOC(O)C(Cl)(Cl)Cl)CC(OC(O)C(Cl)(Cl)Cl)C2O)C(OCCOCCOC(O)C(Cl)(Cl)Cl)C1O	85131940	1	Zhao et al. J Chem Inf Model. 2007;47(1):170–175. DOI:10.1021/ci600312d
177	Oc1noc2CNCCc12	3448	1	Zhao et al. J Chem Inf Model. 2007;47(1):170–175. DOI:10.1021/ci600312d
178	OC1CCN(CC1)c2ccc(nn2)c3ccccc3Cl	65835	1	Zhao et al. J Chem Inf Model. 2007;47(1):170–175. DOI:10.1021/ci600312d
179	OC1CCN(CC1)c2ccc(nn2)c3ccc(Cl)cc3Cl	65836	1	Zhao et al. J Chem Inf Model. 2007;47(1):170–175. DOI:10.1021/ci600312d
180	Oc1ccccc1c2nnco2	13883	1	Zhao et al. J Chem Inf Model. 2007;47(1):170–175. DOI:10.1021/ci600312d
181	Oc1ccccc1C(=O)Oc2ccccc2	8361	1	Zhao et al. J Chem Inf Model. 2007;47(1):170–175. DOI:10.1021/ci600312d
182	Oc1ccc2CC4N(CCC35C(Oc1c23)C(=O)CCC45O)CC6CC6	4428	1	Zhao et al. J Chem Inf Model. 2007;47(1):170–175. DOI:10.1021/ci600312d
183	Oc1ccc2CC4N(CCC35C(Oc1c23)C(=O)CCC45O)CC=C	4425	1	Zhao et al. J Chem Inf Model. 2007;47(1):170–175. DOI:10.1021/ci600312d
184	Oc1ccc2CC4N(CCC35C(Oc1c23)C(=C)CCC45O)CC6CC6	4422	1	Zhao et al. J Chem Inf Model. 2007;47(1):170–175. DOI:10.1021/ci600312d
185	OC1CCC2(O)C3Cc5ccc(O)c6OC1C2(CCN3CC4CCC4)c56	4419	1	Zhao et al. J Chem Inf Model. 2007;47(1):170–175. DOI:10.1021/ci600312d
186	Oc1ccc(NC(=O)C(Cl)(Cl)Cl)cc1	242364	1	Zhao et al. J Chem Inf Model. 2007;47(1):170–175. DOI:10.1021/ci600312d
187	Oc1ccc(C[C@H](N)C)cc1	12234986	0	Roy et al. ACS Omega. 2019; 4(16):16774-16780. DOI: 10.1021/acsomega.9b01512
188	Oc1ccc(/C=C(\C#N)/C(/C#N)=C/c2ccc(O)cc2)cc1	6508939	0	Roy et al. ACS Omega. 2019; 4(16):16774-16780. DOI: 10.1021/acsomega.9b01512
189	Oc1cc2c3c(c1)C[C@@H](N(CCC)CCC)Cc3ccc2	92136292	1	Roy et al. ACS Omega. 2019; 4(16):16774-16780. DOI: 10.1021/acsomega.9b01512
190	Oc1cc2c(cc1)C[C@H]1NCC[C@@]32[C@H]1CCCC3	5463854	1	Roy et al. ACS Omega. 2019; 4(16):16774-16780. DOI: 10.1021/acsomega.9b01512
191	Oc1cc2c(cc1)C[C@H]1N(CCc3ccccc3)CC[C@@]32[C@H]1CCCC3	5362458	1	Roy et al. ACS Omega. 2019; 4(16):16774-16780. DOI: 10.1021/acsomega.9b01512
192	Oc1cc2c(cc1)C[C@H]1N(CC3CCC3)CC[C@@]32[C@@H]1[C@H](C)CC(=C)C3	NA	1	Roy et al. ACS Omega. 2019; 4(16):16774-16780. DOI: 10.1021/acsomega.9b01512
193	Oc1cc2c(cc1)C[C@H]1N(CC3CC3)CC[C@@]32[C@H]1CCOC3	5361874	1	Roy et al. ACS Omega. 2019; 4(16):16774-16780. DOI: 10.1021/acsomega.9b01512
194	Oc1cc2c(cc1)C[C@@H]1N(CC3CCC3)CC[C@]32[C@]1(O)CCCC3	92029083	1	Roy et al. ACS Omega. 2019; 4(16):16774-16780. DOI: 10.1021/acsomega.9b01512
195	Oc1cc2c(cc1)C[C@@H]1N(CC3CC3)CC[C@]32[C@]1(O)CCCC3	101193266	1	Roy et al. ACS Omega. 2019; 4(16):16774-16780. DOI: 10.1021/acsomega.9b01512
196	Oc1cc2c(cc1)C[C@@H]1N(CC=C)CC[C@]32[C@H]1CCCC3	6916182	1	Roy et al. ACS Omega. 2019; 4(16):16774-16780. DOI: 10.1021/acsomega.9b01512
197	Oc1cc2[C@]3(CC)C(C)(C)[C@H](N(CC4CCC4)CC3)Cc2cc1	NA	1	Roy et al. ACS Omega. 2019; 4(16):16774-16780. DOI: 10.1021/acsomega.9b01512
198	Oc1cc2[C@]3(CC)C(C)(C)[C@H](N(CC4CC4)CC3)Cc2cc1	NA	1	Roy et al. ACS Omega. 2019; 4(16):16774-16780. DOI: 10.1021/acsomega.9b01512
199	Oc1cc2[C@]3(C)C[C@@H](CN(C)CC3)Cc2cc1	11770309	1	Roy et al. ACS Omega. 2019; 4(16):16774-16780. DOI: 10.1021/acsomega.9b01512
200	Oc1cc2[C@@]3(CC)C(C)(C)[C@H](N(CC4(O)CC4)CC3)Cc2cc1	443406	1	Roy et al. ACS Omega. 2019; 4(16):16774-16780. DOI: 10.1021/acsomega.9b01512
201	Oc1cc2[C@@]3(C)[C@H](N)[C@H](Cc2cc1)CCCCC3	NA	1	Roy et al. ACS Omega. 2019; 4(16):16774-16780. DOI: 10.1021/acsomega.9b01512
202	Oc1cc2[C@@]3(C)[C@H](C)[C@H](N(CCc4ccccc4)CC3)Cc2cc1	86308950	1	Roy et al. ACS Omega. 2019; 4(16):16774-16780. DOI: 10.1021/acsomega.9b01512
203	Oc1cc2[C@@]3(C)[C@H](C)[C@@H](N(CC4CC4)CC3)Cc2cc1	50909175	1	Roy et al. ACS Omega. 2019; 4(16):16774-16780. DOI: 10.1021/acsomega.9b01512
204	Oc1cc2[C@@]3(C)[C@H](C)[C@@H](N(C/C=C(\C)/C)CC3)Cc2cc1	25234108	1	Roy et al. ACS Omega. 2019; 4(16):16774-16780. DOI: 10.1021/acsomega.9b01512
205	Oc1cc2[C@@]3(C)[C@H](C)[C@@H](N(C)CC3)Cc2cc1	49874210	1	Roy et al. ACS Omega. 2019; 4(16):16774-16780. DOI: 10.1021/acsomega.9b01512
206	Oc1cc([C@]2(CCC)[C@H](C)CN(C)CC2)ccc1	6328429	1	Roy et al. ACS Omega. 2019; 4(16):16774-16780. DOI: 10.1021/acsomega.9b01512
207	Oc1c2O[C@H]3[C@](O)(C)CC[C@@H]4[C@@H]5N(C)CC[C@]34c2c(cc1)C5	NA	1	Roy et al. ACS Omega. 2019; 4(16):16774-16780. DOI: 10.1021/acsomega.9b01512
208	Oc1c2O[C@H]3[C@@]45[C@@H]([C@@H](N(C)CC4)Cc(c25)cc1)CCC3	51927599	1	Roy et al. ACS Omega. 2019; 4(16):16774-16780. DOI: 10.1021/acsomega.9b01512
209	Oc1c2O[C@@H]3C(C)=CC[C@@H]4N(C)[C@@H]5Cc(c2[C@]34C5)cc1	NA	1	Roy et al. ACS Omega. 2019; 4(16):16774-16780. DOI: 10.1021/acsomega.9b01512
210	Oc1c2O[C@@H]3C(=C)CC[C@@]4(O)[C@H]5N(CC6CC6)CC[C@@]34c2c(cc1)C5	92209304	1	Roy et al. ACS Omega. 2019; 4(16):16774-16780. DOI: 10.1021/acsomega.9b01512
211	Oc1c2NC(=C)Cc2c(CCN(CCC)CCC)cc1	NA	1	Roy et al. ACS Omega. 2019; 4(16):16774-16780. DOI: 10.1021/acsomega.9b01512
212	OC1C=CC2C3Cc4ccc(O)c5OC1C2(CCN3CC=C)c45	4423	1	Zhao et al. J Chem Inf Model. 2007;47(1):170–175. DOI:10.1021/ci600312d
213	OC1C=CC2C3Cc4ccc(O)c5OC1C2(CCN3)c45	430245	1	Zhao et al. J Chem Inf Model. 2007;47(1):170–175. DOI:10.1021/ci600312d
214	Oc1c(O)ccc2c1-c1c3[C@H](N(C)CCc3ccc1)C2	6005	1	Roy et al. ACS Omega. 2019; 4(16):16774-16780. DOI: 10.1021/acsomega.9b01512
215	Oc1c(C)c(C)c2O[C@](CCC[C@H](CCC[C@H](CCCC(C)C)C)C)(C)CCc2c1C	1742129	1	Roy et al. ACS Omega. 2019; 4(16):16774-16780. DOI: 10.1021/acsomega.9b01512
216	OC1=C[C@]23[C@]4([C@@H]([C@@H]5N(C)C[C@@]2(C=C1)C5)CCCC4)C3	NA	1	Roy et al. ACS Omega. 2019; 4(16):16774-16780. DOI: 10.1021/acsomega.9b01512
217	OC[C@H]1OC(C(C)C)(C(C)C)OC1	11159776	1	Roy et al. ACS Omega. 2019; 4(16):16774-16780. DOI: 10.1021/acsomega.9b01512
218	OC[C@H]1O[C@@H](n2c3NC=[N+H][C-](O)c3nc2)CC1	NA	0	Roy et al. ACS Omega. 2019; 4(16):16774-16780. DOI: 10.1021/acsomega.9b01512
219	OC[C@H](NCCN[C@@H](CO)CC)CC	470071	0	Roy et al. ACS Omega. 2019; 4(16):16774-16780. DOI: 10.1021/acsomega.9b01512
220	OC[C@@H]1C=C[C@H](n2c3nc(N)nc(NC4CC4)c3nc2)C1	441300	1	Roy et al. ACS Omega. 2019; 4(16):16774-16780. DOI: 10.1021/acsomega.9b01512
221	OC[C@@H]1[C@H](O)C[C@H](n2c3N=CNC[C@@H](O)c3nc2)O1	44283251	1	Roy et al. ACS Omega. 2019; 4(16):16774-16780. DOI: 10.1021/acsomega.9b01512
222	OC[C@@]2([H])O[C@@]([H])(O/C1=C/C=C/C=C1/CO)[C@@](O)([H])[C@@](O)([H])[C@@]2(O)[H]	439503	1	Shen et al. J Chem Inf Model. 2010;50(6):1034-1041. DOI: 10.1021/ci100104j
223	OC[C@@]1([H])O[C@@]([H])(C[C@@]1(O)[H])N2C=NC3=C2NC=NC[C@@]3(O)[H]	439693	1	Shen et al. J Chem Inf Model. 2010;50(6):1034-1041. DOI: 10.1021/ci100104j
224	OC[C@@]1([H])CC[C@@]([H])(O1)N2C=NC=3C(O)=NC=NC2=3	135398739	0	Shen et al. J Chem Inf Model. 2010;50(6):1034-1041. DOI: 10.1021/ci100104j
225	OC[C@@](O)([H])[C@@]2([H])O[C@@]1([H])O[C@@]([H])(O[C@@]1([H])[C@@]2(O)[H])C([Cl])([Cl])[Cl]	7057995	1	Shen et al. J Chem Inf Model. 2010;50(6):1034-1041. DOI: 10.1021/ci100104j
226	OC[C@@]([H])(NC(=O)C([Cl])([Cl])[H])[C@@](O)([H])C1=CC=C(C=C1)N(=O)=O	5959	1	Shen et al. J Chem Inf Model. 2010;50(6):1034-1041. DOI: 10.1021/ci100104j
227	OC(OCC(COC(O)C(Cl)(Cl)Cl)(COC(O)C(Cl)(Cl)Cl)COC(O)C(Cl)(Cl)Cl)C(Cl)(Cl)Cl	6519	1	Zhao et al. J Chem Inf Model. 2007;47(1):170–175. DOI:10.1021/ci600312d
228	OC(O)C(Cl)(Cl)Cl	2707	1	Zhao et al. J Chem Inf Model. 2007;47(1):170–175. DOI:10.1021/ci600312d
229	OC(N1CNC(C1=O)(c2ccccc2)c3ccccc3)C(Cl)(Cl)Cl	3083540	1	Zhao et al. J Chem Inf Model. 2007;47(1):170–175. DOI:10.1021/ci600312d
230	OC(Cn1cncn1)(Cn2cncn2)c3ccc(F)cc3F	3365	1	Zhao et al. J Chem Inf Model. 2007;47(1):170–175. DOI:10.1021/ci600312d
231	OC(Cn1ccnc1)c3ccc(CCc2ccccc2)cc3	53626	1	Zhao et al. J Chem Inf Model. 2007;47(1):170–175. DOI:10.1021/ci600312d
232	OC(CN1CCCCC1)c2cc(on2)c3ccccc3	71109	1	Zhao et al. J Chem Inf Model. 2007;47(1):170–175. DOI:10.1021/ci600312d
233	OC(CCCN1CCc3c(C1)c2cc(F)ccc2n3c4ccc(F)cc4)c5ccc(F)cc5	51174	1	Zhao et al. J Chem Inf Model. 2007;47(1):170–175. DOI:10.1021/ci600312d
234	OC(C1CCNCC1)(c2ccccc2)c3ccccc3	15723	1	Zhao et al. J Chem Inf Model. 2007;47(1):170–175. DOI:10.1021/ci600312d
235	OC(C1CCCCN1)c2cc(nc3c(cccc23)C(F)(F)F)C(F)(F)F	4046	1	Zhao et al. J Chem Inf Model. 2007;47(1):170–175. DOI:10.1021/ci600312d
236	OC(C1CCCCN1)(c2ccccc2)c3ccccc3	10083	1	Zhao et al. J Chem Inf Model. 2007;47(1):170–175. DOI:10.1021/ci600312d
237	OC(C1CC1c2ccncc2)(c3ccccc3)c4ccccc4	23287	1	Zhao et al. J Chem Inf Model. 2007;47(1):170–175. DOI:10.1021/ci600312d
238	OC(C1=NCCN1)(c2ccc(Cl)cc2)c3ccccn3	32940	1	Zhao et al. J Chem Inf Model. 2007;47(1):170–175. DOI:10.1021/ci600312d
239	OC(C(=O)OCCN1CCCCC1)(c1ccccc1)c1ccccc1	20674	1	Zhao et al. J Chem Inf Model. 2007;47(1):170–175. DOI:10.1021/ci600312d
240	OC(C(=O)NC2C1SCC(=C(N1C2=O)C(O)=O)CSc3nnnn3CS(O)(=O)=O)c4ccccc4	4630261	0	Zhao et al. J Chem Inf Model. 2007;47(1):170–175. DOI:10.1021/ci600312d
241	OC(=O)COCCN1CCN(CC1)C(c2ccccc2)c3ccc(Cl)cc3	2678	0	Zhao et al. J Chem Inf Model. 2007;47(1):170–175. DOI:10.1021/ci600312d
242	OC(=O)CNC(=O)c1ccccc1O	10253	1	Zhao et al. J Chem Inf Model. 2007;47(1):170–175. DOI:10.1021/ci600312d
243	OC(=O)CN1C(=O)c2cccc3cccc(C1=O)c23	2120	1	Zhao et al. J Chem Inf Model. 2007;47(1):170–175. DOI:10.1021/ci600312d
244	OC(=O)CCCCCCNC2c1ccccc1CCc3ccccc23	34870	1	Zhao et al. J Chem Inf Model. 2007;47(1):170–175. DOI:10.1021/ci600312d
245	OC(=O)CCCCCCCC(O)=O	2266	0	Zhao et al. J Chem Inf Model. 2007;47(1):170–175. DOI:10.1021/ci600312d
246	OC(=O)CCCCC1SCC2NC(=O)NC12	253	1	Zhao et al. J Chem Inf Model. 2007;47(1):170–175. DOI:10.1021/ci600312d
247	OC(=O)CCCc1ccc(cc1)N(CCCl)CCCl	2708	0	Zhao et al. J Chem Inf Model. 2007;47(1):170–175. DOI:10.1021/ci600312d
248	OC(=O)CCCC[C@@]1([H])[S]C[C@@]2([H])NC(=O)N[C@@]12[H]	171548	1	Shen et al. J Chem Inf Model. 2010;50(6):1034-1041. DOI: 10.1021/ci100104j
249	OC(=O)c4cn(C1CC1)c3cc(N2CCNCC2)c(F)cc3c4=O	2764	0	Zhao et al. J Chem Inf Model. 2007;47(1):170–175. DOI:10.1021/ci600312d
250	OC(=O)c2cc(=O)c1ccccc1o2	2741	1	Zhao et al. J Chem Inf Model. 2007;47(1):170–175. DOI:10.1021/ci600312d
251	OC(=O)C2=C(CSC3C(NC(=O)Cn1cnnn1)C(=O)N23)CSc4nncs4	2653	0	Zhao et al. J Chem Inf Model. 2007;47(1):170–175. DOI:10.1021/ci600312d
252	OC(=O)C2=C(CSC3C(NC(=O)Cc1cccs1)C(=O)N23)CSc4nc[nH]n4	12760821	0	Zhao et al. J Chem Inf Model. 2007;47(1):170–175. DOI:10.1021/ci600312d
253	OC(=O)C1CCn2c1ccc2C(=O)c3ccccc3	3826	0	Zhao et al. J Chem Inf Model. 2007;47(1):170–175. DOI:10.1021/ci600312d
254	OC(=O)C1CCN1C34CC2CC(CC(C2)C3)C4	37906	1	Zhao et al. J Chem Inf Model. 2007;47(1):170–175. DOI:10.1021/ci600312d
255	OC(=O)c1ccccc1OC(=O)c1ccccc1O	5161	1	Zhao et al. J Chem Inf Model. 2007;47(1):170–175. DOI:10.1021/ci600312d
256	OC(=O)c1ccccc1O	338	0	Zhao et al. J Chem Inf Model. 2007;47(1):170–175. DOI:10.1021/ci600312d
257	OC(=O)C1=C(C[S][C@@]2([H])N1C(=O)[C@@]2([H])NC(=O)CN3C=NN=N3)C[S]/C4=N/N=C[S]4	65755	0	Shen et al. J Chem Inf Model. 2010;50(6):1034-1041. DOI: 10.1021/ci100104j
258	OC(=O)C1=C(C[S][C@@]2([H])N1C(=O)[C@@]2([H])NC(=O)C/C3=C/C=C[S]3)C[S]C=4N=CNN=4	193956	0	Shen et al. J Chem Inf Model. 2010;50(6):1034-1041. DOI: 10.1021/ci100104j
259	OC([C@@H]1NCCCC1)(c1ccccc1)c1ccccc1	6951230	1	Roy et al. ACS Omega. 2019; 4(16):16774-16780. DOI: 10.1021/acsomega.9b01512
260	OC([C@@H]1[C@@H](c2ccncc2)C1)(c1ccccc1)c1ccccc1	92533340	1	Roy et al. ACS Omega. 2019; 4(16):16774-16780. DOI: 10.1021/acsomega.9b01512
261	OC([C@@H](N)CCCCC)(c1ccccc1)c1ccccc1	76961485	1	Roy et al. ACS Omega. 2019; 4(16):16774-16780. DOI: 10.1021/acsomega.9b01512
262	O=S1(=O)N([C@H]2C(=O)NCCC2)C(=O)c2c1cccc2	76972724	1	Roy et al. ACS Omega. 2019; 4(16):16774-16780. DOI: 10.1021/acsomega.9b01512
263	O=S1(=O)c2c(N(C[C@@H](CN(C)C)C)c3c1cccc3)cccc2	25271707	1	Roy et al. ACS Omega. 2019; 4(16):16774-16780. DOI: 10.1021/acsomega.9b01512
264	O=NN(C(=O)N[C@@H]1[C@@H](O)[C@H](O)[C@@H](CO)O[C@H]1O)C	7067772	0	Roy et al. ACS Omega. 2019; 4(16):16774-16780. DOI: 10.1021/acsomega.9b01512
265	O=CN(/C(/C)=C\1/SC(=O)OCC/1)Cc1c(N)nc(C)nc1	3034024	1	Roy et al. ACS Omega. 2019; 4(16):16774-16780. DOI: 10.1021/acsomega.9b01512
266	O=CC=1N2C(=O)[C@@H]([C@H](O)C)[C@H]2[C@H]2C=1[C@H](OC)CCC2	NA	0	Roy et al. ACS Omega. 2019; 4(16):16774-16780. DOI: 10.1021/acsomega.9b01512
267	O=CC[C@H]1[C@H](O[C@H]2[C@H](O)[C@@H](N(C)C)[C@@H](O[C@@H]3O[C@H](C)[C@@H](O)[C@](O)(C)C3)[C@H](C)O2)[C@@H](OC)[C@H](O)CC(=O)O[C@@H](C)C/C=C\C=C\[C@@H](O)[C@H](C)C1	NA	0	Roy et al. ACS Omega. 2019; 4(16):16774-16780. DOI: 10.1021/acsomega.9b01512
268	O=CC[C@H]1[C@H](O[C@@H]2[C@@H](O)[C@H](N(C)C)[C@H](O[C@H]3O[C@H](C)[C@@H](O)[C@@](O)(C)C3)[C@H](C)O2)[C@@H](OC)[C@@H](O)CC(=O)O[C@@H](C)C/C=C/C=C/[C@H](O[C@H]2O[C@@H](C)[C@H](N(C)C)CC2)[C@H](C)C1	NA	0	Roy et al. ACS Omega. 2019; 4(16):16774-16780. DOI: 10.1021/acsomega.9b01512
269	O=C4N[C@@]([H])(CCCCNC(=O)[C@@]([H])(NC(=O)[C@@]([H])(NC(=O)[C@@]([H])(NC(=O)[C@@]1([H])N=C([S]C1)[C@@](N)([H])[C@@](C)([H])CC)CC(C)(C)[H])CCC(O)=O)[C@@](C)([H])CC)C(=O)N[C@@]([H])(CCCN)C(=O)N[C@@]([H])(C(=O)N[C@@]([H])(C/C2=C/C=CC=C2)C(=O)N[C@@]([H])(C/C3=C/NC=N3)C(=O)N[C@@]([H])(CC(O)=O)C(=O)N[C@@]4([H])CC(N)=O)[C@@](C)([H])CC	NA	0	Shen et al. J Chem Inf Model. 2010;50(6):1034-1041. DOI: 10.1021/ci100104j
270	O=C4CCC(N3C(=O)C2C1CCC(C1)C2C3=O)C(=O)N4	26516	1	Zhao et al. J Chem Inf Model. 2007;47(1):170–175. DOI:10.1021/ci600312d
271	O=C4C3C1C=CC(C2C=CC12)C3C(=O)N4CCCCN5CCN(CC5)c6ncccn6	9804072	1	Zhao et al. J Chem Inf Model. 2007;47(1):170–175. DOI:10.1021/ci600312d
272	O=C3NC(=O)C2(CCc1ccccc1C2)N3	71726	1	Zhao et al. J Chem Inf Model. 2007;47(1):170–175. DOI:10.1021/ci600312d
273	O=C3N(CCCN1CCN(CC1)c2ncccn2)S(=O)(=O)c4ccccc34	72024	1	Zhao et al. J Chem Inf Model. 2007;47(1):170–175. DOI:10.1021/ci600312d
274	O=C3N(CCCCN1CCN(CC1)c2ncccn2)S(=O)(=O)c4ccccc34	56971	1	Zhao et al. J Chem Inf Model. 2007;47(1):170–175. DOI:10.1021/ci600312d
275	O=C3N(CCCCN1CCN(CC1)C2=NC=CC=N2)C(=O)[C@@]4([H])[C@@]3([H])[C@@]5([H])CC[C@@]4([H])C5	91273	1	Shen et al. J Chem Inf Model. 2010;50(6):1034-1041. DOI: 10.1021/ci100104j
276	O=C3N(CCCCN1CCN(CC1)C2=NC=CC=N2)C(=O)[C@@]4([H])[C@@]3([H])[C@@]5([H])C=C[C@@]4([H])[C@@]6([H])C=C[C@@]56[H]	163925	1	Shen et al. J Chem Inf Model. 2010;50(6):1034-1041. DOI: 10.1021/ci100104j
277	O=C3N(c1ccccc1)c2ccccc2C3(Cc4ccncc4)Cc5ccncc5	3932	1	Zhao et al. J Chem Inf Model. 2007;47(1):170–175. DOI:10.1021/ci600312d
278	O=C3CN=C(c1ccccc1)c2cc(ccc2N3)N(=O)=O	4506	1	Zhao et al. J Chem Inf Model. 2007;47(1):170–175. DOI:10.1021/ci600312d
279	O=C3CCC1(CCC(=O)c2ccccc12)C(=O)N3	17928	1	Zhao et al. J Chem Inf Model. 2007;47(1):170–175. DOI:10.1021/ci600312d
280	O=C3CCC(N2C(=O)c1ccccc1C2=O)C(=O)N3	5426	1	Zhao et al. J Chem Inf Model. 2007;47(1):170–175. DOI:10.1021/ci600312d
281	O=C3CCC(C1CCN(CC1)CC=Cc2ccccc2)(C(=O)N3)c4ccccc4	26917	1	Zhao et al. J Chem Inf Model. 2007;47(1):170–175. DOI:10.1021/ci600312d
282	O=C3C2C1CCC(C1)C2C(=O)N3CCCCN4CCN(CC4)c5ncccn5	5378	1	Zhao et al. J Chem Inf Model. 2007;47(1):170–175. DOI:10.1021/ci600312d
283	O=C2NCN(c1ccccc1)C23CCN(CC3)CC5COc4ccccc4O5	5268	1	Zhao et al. J Chem Inf Model. 2007;47(1):170–175. DOI:10.1021/ci600312d
284	O=C2NC(=O)C(CC1CCCCN1)(C(=O)N2)c3ccccc3	3050417	1	Zhao et al. J Chem Inf Model. 2007;47(1):170–175. DOI:10.1021/ci600312d
285	O=C2N=C(NC1CC1)OC2c3ccccc3	135438121	1	Zhao et al. J Chem Inf Model. 2007;47(1):170–175. DOI:10.1021/ci600312d
286	O=C2CN=C(c1ccccc1)c3c(N2)sc4CCCCc34	135412795	1	Zhao et al. J Chem Inf Model. 2007;47(1):170–175. DOI:10.1021/ci600312d
287	O=C2CC1(CCCC1)CC(=O)N2CCNCC4COc3ccccc3O4	60769	1	Zhao et al. J Chem Inf Model. 2007;47(1):170–175. DOI:10.1021/ci600312d
288	O=C2CC1(CCCC1)CC(=O)N2CCCCN3CCN(CC3)c4nsc5ccccc45	55752	1	Zhao et al. J Chem Inf Model. 2007;47(1):170–175. DOI:10.1021/ci600312d
289	O=C2CC1(CCCC1)CC(=O)N2CCCCN3CCN(CC3)c4ncccn4	2477	1	Zhao et al. J Chem Inf Model. 2007;47(1):170–175. DOI:10.1021/ci600312d
290	O=C2C1CCCCC1C(=O)N2CCCCN3CCN(CC3)c4nsc5ccccc45	14096625	1	Zhao et al. J Chem Inf Model. 2007;47(1):170–175. DOI:10.1021/ci600312d
291	O=c2[nH]c1ccccc1n2C4CCN(CCOc3ccccc3)CC4	68634	1	Zhao et al. J Chem Inf Model. 2007;47(1):170–175. DOI:10.1021/ci600312d
292	O=C1NCNC1(c2ccccc2)c3ccccc3	18622	1	Zhao et al. J Chem Inf Model. 2007;47(1):170–175. DOI:10.1021/ci600312d
293	O=C1NCCN1C4CCN(CCC3COc2ccccc2O3)CC4	12850587	1	Zhao et al. J Chem Inf Model. 2007;47(1):170–175. DOI:10.1021/ci600312d
294	O=C1NCCN[C@@]1([H])C2=CC=C[S]2	65649	1	Shen et al. J Chem Inf Model. 2010;50(6):1034-1041. DOI: 10.1021/ci100104j
295	O=C1NCCCC1N3C(=O)c2ccccc2S3(=O)=O	39528	1	Zhao et al. J Chem Inf Model. 2007;47(1):170–175. DOI:10.1021/ci600312d
296	O=C1NC(=O)CN(C[C@H]2C=C3[C@H](N(C)C2)Cc2c4c([nH]c2)cccc34)C1	10569863	1	Roy et al. ACS Omega. 2019; 4(16):16774-16780. DOI: 10.1021/acsomega.9b01512
297	O=C1NC(=O)CN([C@H](CN2CC(=O)NC(=O)C2)C)C1	71384	0	Roy et al. ACS Omega. 2019; 4(16):16774-16780. DOI: 10.1021/acsomega.9b01512
298	O=C1NC(=O)C(N1)(c2ccccc2)c3ccccc3	1775	1	Zhao et al. J Chem Inf Model. 2007;47(1):170–175. DOI:10.1021/ci600312d
299	O=C1N2C(C(=O)O[C@@H](C(C)C)[C@H](C)/C=C/C(=O)NC/C=C/C(/C)=C\[C@@H](O)CC(=O)Cc3occ1n3)=CCC2	NA	0	Roy et al. ACS Omega. 2019; 4(16):16774-16780. DOI: 10.1021/acsomega.9b01512
300	O=C1N2C(=NCC1)C[C@H](c1ccccc1)C2	76968550	1	Roy et al. ACS Omega. 2019; 4(16):16774-16780. DOI: 10.1021/acsomega.9b01512
301	O=C1N2[C@H](NC(=O)C2)CC1	54488315	1	Roy et al. ACS Omega. 2019; 4(16):16774-16780. DOI: 10.1021/acsomega.9b01512
302	O=C1N[C@H](C)[C@H](c2ccccc2)OC1	10750231	1	Roy et al. ACS Omega. 2019; 4(16):16774-16780. DOI: 10.1021/acsomega.9b01512
303	O=C1N(CN2CCOCC2)C(=O)C[C@@]1(C)c1ccccc1	14454437	1	Roy et al. ACS Omega. 2019; 4(16):16774-16780. DOI: 10.1021/acsomega.9b01512
304	O=C1N(CCNC[C@H]2Oc3c(OC2)cccc3)C(=O)CC2(C1)CCCC2	10321744	1	Roy et al. ACS Omega. 2019; 4(16):16774-16780. DOI: 10.1021/acsomega.9b01512
305	O=C1N(CCN(C)C)c2c(S[C@H](c3ccccc3)C1)cccc2	76966022	1	Roy et al. ACS Omega. 2019; 4(16):16774-16780. DOI: 10.1021/acsomega.9b01512
306	O=C1N(CCCCN2CCN(c3nsc4c3cccc4)CC2)C(=O)[C@@H]2[C@H]1CCCC2	115368	1	Roy et al. ACS Omega. 2019; 4(16):16774-16780. DOI: 10.1021/acsomega.9b01512
307	O=C1N(CCCCN2CCN(c3ncccn3)CC2)C(=O)[C@@H]2[C@H]1[C@H]1C[C@@H]2CC1	5282466	1	Roy et al. ACS Omega. 2019; 4(16):16774-16780. DOI: 10.1021/acsomega.9b01512
308	O=C1N(CCCCN2CCN(c3ncccn3)CC2)C(=O)[C@@H]2[C@H]1[C@@H]1[C@@H]3[C@H]([C@H]2C=C1)C=C3	6918039	1	Roy et al. ACS Omega. 2019; 4(16):16774-16780. DOI: 10.1021/acsomega.9b01512
309	O=C1N(Cc2ccccc2)C[C@@H](CN)C1	40490185	1	Roy et al. ACS Omega. 2019; 4(16):16774-16780. DOI: 10.1021/acsomega.9b01512
310	O=C1N(CC=C)C(=O)O[C@@H]1C	76956769	1	Roy et al. ACS Omega. 2019; 4(16):16774-16780. DOI: 10.1021/acsomega.9b01512
311	O=C1N(CC)C[C@@H](CCN2CCOCC2)C1(c1ccccc1)c1ccccc1	28248394	1	Roy et al. ACS Omega. 2019; 4(16):16774-16780. DOI: 10.1021/acsomega.9b01512
312	O=C1N(CC)C(=O)N[C@H]1c1ccccc1	6604216	1	Roy et al. ACS Omega. 2019; 4(16):16774-16780. DOI: 10.1021/acsomega.9b01512
313	O=C1N(C2CCN(CC[C@@H]3Oc4c(OC3)cccc4)CC2)CCN1	6328465	1	Roy et al. ACS Omega. 2019; 4(16):16774-16780. DOI: 10.1021/acsomega.9b01512
314	O=C1N(c2ccccc2)c2c([C@]1(CCCNC)C)cccc2	76961481	1	Roy et al. ACS Omega. 2019; 4(16):16774-16780. DOI: 10.1021/acsomega.9b01512
315	O=C1N(c2cc(C)ccc2)C[C@H](CO)O1	13753598	1	Roy et al. ACS Omega. 2019; 4(16):16774-16780. DOI: 10.1021/acsomega.9b01512
316	O=C1N(c2c(C)cccc2)C(/C=C\c2ncccc2)=Nc2c1cccc2	36791339	1	Roy et al. ACS Omega. 2019; 4(16):16774-16780. DOI: 10.1021/acsomega.9b01512
317	O=C1N(C[C@H]2C[N@@]3[C@H](CN(c4ncccn4)CC3)CC2)C(=O)CC1	14995235	1	Roy et al. ACS Omega. 2019; 4(16):16774-16780. DOI: 10.1021/acsomega.9b01512
318	O=C1N(C[C@H](N(C)C)C)c2c(Nc3ncccc13)cccc2	76958251	1	Roy et al. ACS Omega. 2019; 4(16):16774-16780. DOI: 10.1021/acsomega.9b01512
319	O=C1N(C)C(=O)O[C@@]1(CC)C	51380897	1	Roy et al. ACS Omega. 2019; 4(16):16774-16780. DOI: 10.1021/acsomega.9b01512
320	O=C1N(C)C(=O)NC(=O)[C@@]1(CC)c1ccccc1	667501	1	Roy et al. ACS Omega. 2019; 4(16):16774-16780. DOI: 10.1021/acsomega.9b01512
321	O=C1N(C)C(=O)NC(=O)[C@@]1(C)C1=CCCCC1	6931309	1	Roy et al. ACS Omega. 2019; 4(16):16774-16780. DOI: 10.1021/acsomega.9b01512
322	O=C1N(C)C(=O)NC(=O)[C@@]1([C@@H](C#CCC)C)CC=C	51397656	1	Roy et al. ACS Omega. 2019; 4(16):16774-16780. DOI: 10.1021/acsomega.9b01512
323	O=C1N(C)C(=O)N[C@@]1(CC)c1ccccc1	107921	1	Roy et al. ACS Omega. 2019; 4(16):16774-16780. DOI: 10.1021/acsomega.9b01512
324	O=C1N(C)C(=O)c2n(CCNC[C@H](O)c3cc(O)c(O)cc3)cnc2N1C	76961550	0	Roy et al. ACS Omega. 2019; 4(16):16774-16780. DOI: 10.1021/acsomega.9b01512
325	O=C1N(C)C(=O)c2n(CCN[C@H](Cc3ccccc3)C)cnc2N1C	25322826	1	Roy et al. ACS Omega. 2019; 4(16):16774-16780. DOI: 10.1021/acsomega.9b01512
326	O=C1N(C)C(=O)c2n(CCN[C@H]([C@@H](O)c3ccccc3)C)cnc2N1C	56840928	1	Roy et al. ACS Omega. 2019; 4(16):16774-16780. DOI: 10.1021/acsomega.9b01512
327	O=C1N(C)C(=O)c2n(C[C@@H](O)C)cnc2N1C	158961	1	Roy et al. ACS Omega. 2019; 4(16):16774-16780. DOI: 10.1021/acsomega.9b01512
328	O=C1N(C)C(=O)C[C@@H]1c1ccccc1	6604215	1	Roy et al. ACS Omega. 2019; 4(16):16774-16780. DOI: 10.1021/acsomega.9b01512
329	O=C1N(C)C(=O)C[C@@]1(C)c1ccccc1	28125487	1	Roy et al. ACS Omega. 2019; 4(16):16774-16780. DOI: 10.1021/acsomega.9b01512
330	O=C1N(C)[C@H]([C@H](O)[C@H](C/C=C/C)C)C(=O)N[C@@H](CC)C(=O)N(C)CC(=O)N(C)[C@H](CC(C)C)C(=O)N[C@@H](C(C)C)C(=O)N(C)[C@H](CC(C)C)C(=O)N[C@@H](C)C(=O)N[C@H](C)C(=O)N(C)[C@H](CC(C)C)C(=O)N(C)[C@H](CC(C)C)C(=O)N(C)[C@H]1C(C)C	NA	0	Roy et al. ACS Omega. 2019; 4(16):16774-16780. DOI: 10.1021/acsomega.9b01512
331	O=C1N(C)[C@](CC)(c2ccccc2)C(=O)N1	76966547	1	Roy et al. ACS Omega. 2019; 4(16):16774-16780. DOI: 10.1021/acsomega.9b01512
332	O=C1N(C)[C@@H](c2cnccc2)CC1	21907	1	Roy et al. ACS Omega. 2019; 4(16):16774-16780. DOI: 10.1021/acsomega.9b01512
333	O=C1N([C@H]2[C@H](O)[C@H](O)[C@@H](CO)O2)C=CC(N)=N1	6175	1	Roy et al. ACS Omega. 2019; 4(16):16774-16780. DOI: 10.1021/acsomega.9b01512
334	O=C1N([C@@H]2O[C@H](CO)C=C2)C=C(C)C(=O)N1	18283	1	Roy et al. ACS Omega. 2019; 4(16):16774-16780. DOI: 10.1021/acsomega.9b01512
335	O=C1CN2C(CCC2=O)N1	65955	1	Zhao et al. J Chem Inf Model. 2007;47(1):170–175. DOI:10.1021/ci600312d
336	O=C1CN(CC2N1CCc3ccccc23)C(=O)C4CCCCC4	4891	1	Zhao et al. J Chem Inf Model. 2007;47(1):170–175. DOI:10.1021/ci600312d
337	O=C1CCN=C2CC(CN12)c3ccccc3	71152	1	Zhao et al. J Chem Inf Model. 2007;47(1):170–175. DOI:10.1021/ci600312d
338	O=C1CCC2CCC(=O)N12	71893	1	Zhao et al. J Chem Inf Model. 2007;47(1):170–175. DOI:10.1021/ci600312d
339	O=C1CCC(N1)C(=O)NC2CC2c3ccccc3	90993	1	Zhao et al. J Chem Inf Model. 2007;47(1):170–175. DOI:10.1021/ci600312d
340	O=C1CCC(N1)C(=O)N1CCCCC1	3042287	1	Zhao et al. J Chem Inf Model. 2007;47(1):170–175. DOI:10.1021/ci600312d
341	O=C1CCC(=O)N1CC1CCC2CN(CCN2C1)c1ncccn1	9799246	1	Zhao et al. J Chem Inf Model. 2007;47(1):170–175. DOI:10.1021/ci600312d
342	O=C1CC2=C([C@H]3[C@@H]([C@H](C)C2)[C@H]2[C@@](C)([C@](O)(C#C)CC2)CC3)CC1	NA	1	Roy et al. ACS Omega. 2019; 4(16):16774-16780. DOI: 10.1021/acsomega.9b01512
343	O=C1CC[C@@](C(=O)N1)(C2=CC=CC=C2)[C@@]3([H])CCN(CC3)C/C=C/C4=C/C=CC=C4	6433620	1	Shen et al. J Chem Inf Model. 2010;50(6):1034-1041. DOI: 10.1021/ci100104j
344	O=C1CC[C@@]([H])(N1)C(=O)N2CCCCC2	198695	1	Shen et al. J Chem Inf Model. 2010;50(6):1034-1041. DOI: 10.1021/ci100104j
345	O=c1c2c([nH]c(=O)n1C)ncn2C	4687	1	Zhao et al. J Chem Inf Model. 2007;47(1):170–175. DOI:10.1021/ci600312d
346	O=C1C2(N(c3ccccc3)CN1)CCN(C[C@H]1Oc3c(OC1)cccc3)CC2	14154480	1	Roy et al. ACS Omega. 2019; 4(16):16774-16780. DOI: 10.1021/acsomega.9b01512
347	O=C1C=C2[C@](C)([C@@H]3[C@H]([C@H]4[C@@](C)([C@@H](O)CC4)CC3)CC2)CC1	12304595	1	Roy et al. ACS Omega. 2019; 4(16):16774-16780. DOI: 10.1021/acsomega.9b01512
348	O=C1C[C@H]2[C@@H](C(C)(C)Oc3c2c(O)cc(C(CCCCCC)(C)C)c3)CC1	12895761	1	Roy et al. ACS Omega. 2019; 4(16):16774-16780. DOI: 10.1021/acsomega.9b01512
349	O=C1C[C@@]23[C@H]([C@@H](N(CC4CC4)CC2)Cc2c3c(O)ccc2)CC1	6916423	1	Roy et al. ACS Omega. 2019; 4(16):16774-16780. DOI: 10.1021/acsomega.9b01512
350	O=C1C(O)=C(O)[C@@H]([C@@H](O)CO)O1	54670067	1	Roy et al. ACS Omega. 2019; 4(16):16774-16780. DOI: 10.1021/acsomega.9b01512
351	O=C1C(C[C@H]2NCCCC2)(c2ccccc2)C(=O)NC(=O)N1	76960176	1	Roy et al. ACS Omega. 2019; 4(16):16774-16780. DOI: 10.1021/acsomega.9b01512
352	O=C1C(C[C@@H](O)C)(CC=C)C(=O)NC(=O)N1	76968710	1	Roy et al. ACS Omega. 2019; 4(16):16774-16780. DOI: 10.1021/acsomega.9b01512
353	O=C1C([C@H](CCC)C)(CC)C(=O)NC(O)N1	29063213	1	Roy et al. ACS Omega. 2019; 4(16):16774-16780. DOI: 10.1021/acsomega.9b01512
354	O=C1C([C@H](CCC)C)(CC)C(=O)NC(=O)N1	88981	1	Roy et al. ACS Omega. 2019; 4(16):16774-16780. DOI: 10.1021/acsomega.9b01512
355	O=C1C([C@@H](CCC)CC)(CC)C(=O)NC(=O)N1	76970408	1	Roy et al. ACS Omega. 2019; 4(16):16774-16780. DOI: 10.1021/acsomega.9b01512
356	O=C1C([C@@H](CCC)C)(CC=C)C(=O)NC(=O)N1	31143	1	Roy et al. ACS Omega. 2019; 4(16):16774-16780. DOI: 10.1021/acsomega.9b01512
357	O=C1C([C@@H](CCC)C)(C=C)C(=O)NC(=O)N1	76965933	1	Roy et al. ACS Omega. 2019; 4(16):16774-16780. DOI: 10.1021/acsomega.9b01512
358	O=C1C([C@@H](CC)C)(CC=C)C(=O)NC(=O)N1	76959567	1	Roy et al. ACS Omega. 2019; 4(16):16774-16780. DOI: 10.1021/acsomega.9b01512
359	O=C1C([C@@H](CC)C)(CC)C(=O)NC(=O)N1	40463715	1	Roy et al. ACS Omega. 2019; 4(16):16774-16780. DOI: 10.1021/acsomega.9b01512
360	O=c1[nH]cnc2[nH]ncc12	135401907	1	Zhao et al. J Chem Inf Model. 2007;47(1):170–175. DOI:10.1021/ci600312d
361	O=C1[C@H]2Oc3c(O)ccc4c3[C@]32[C@H]([C@@H](N(C)CC3)C4)CC1	NA	1	Roy et al. ACS Omega. 2019; 4(16):16774-16780. DOI: 10.1021/acsomega.9b01512
362	O=C1[C@H]2Oc3c(O)ccc4c3[C@]32[C@](O)([C@@H](N(CC2CC2)CC3)C4)CC1	NA	1	Roy et al. ACS Omega. 2019; 4(16):16774-16780. DOI: 10.1021/acsomega.9b01512
363	O=C1[C@H]2N(CC3CC3)CC[C@@](C)([C@H]2C)c2c1ccc(O)c2	23724935	1	Roy et al. ACS Omega. 2019; 4(16):16774-16780. DOI: 10.1021/acsomega.9b01512
364	O=C1[C@H]2[C@@H](Cc3[nH]c(C)c(CC)c13)CCN(C)C2	NA	1	Roy et al. ACS Omega. 2019; 4(16):16774-16780. DOI: 10.1021/acsomega.9b01512
365	O=C1[C@H](Cc2ccccc2)NC(=O)[C@@H](CC(C)C)NC(=O)[C@@H](CCCN)NC(=O)[C@H](C(C)C)NC(=O)[C@H]2N(C(=O)[C@H](Cc3ccccc3)NC(=O)[C@H](CC(C)C)NC(=O)[C@H](CCCN)NC(=O)[C@H](C(C)C)NC(=O)[C@@H]3N1CCC3)CCC2	NA	0	Roy et al. ACS Omega. 2019; 4(16):16774-16780. DOI: 10.1021/acsomega.9b01512
366	O=C1[C@H](C)CNC(=O)C1(CC)CC	40467203	1	Roy et al. ACS Omega. 2019; 4(16):16774-16780. DOI: 10.1021/acsomega.9b01512
367	O=C1[C@H](/C=C/c2ccccc2)OC(C)(C)N1	124301152	1	Roy et al. ACS Omega. 2019; 4(16):16774-16780. DOI: 10.1021/acsomega.9b01512
368	O=C1[C@]2(C)Oc3c(O)ccc4c3[C@]32[C@H]([C@@H](N(C)CC3)C4)CC1	NA	1	Roy et al. ACS Omega. 2019; 4(16):16774-16780. DOI: 10.1021/acsomega.9b01512
369	O=C1[C@]2(C)C(C)(C)[C@H](C1)CC2	444294	1	Roy et al. ACS Omega. 2019; 4(16):16774-16780. DOI: 10.1021/acsomega.9b01512
370	O=C1[C@](O)(CC)C2=C(C(=O)N3C(c4nc5c(c(CN(C)C)c(O)cc5)cc4C3)=C2)CO1	60700	0	Roy et al. ACS Omega. 2019; 4(16):16774-16780. DOI: 10.1021/acsomega.9b01512
371	O=C1[C@](CC)(c2ccccc2)NCC(=O)N1	76969355	1	Roy et al. ACS Omega. 2019; 4(16):16774-16780. DOI: 10.1021/acsomega.9b01512
372	O=C1[C@](CC)(c2ccccc2)CCC(=O)N1	10176773	1	Roy et al. ACS Omega. 2019; 4(16):16774-16780. DOI: 10.1021/acsomega.9b01512
373	O=C1[C@](c2ccccc2)(C2CCN(C/C=C/c3ccccc3)CC2)CCC(=O)N1	124220610	1	Roy et al. ACS Omega. 2019; 4(16):16774-16780. DOI: 10.1021/acsomega.9b01512
374	O=C1[C@@H]2Oc3c(O)ccc4c3[C@@]32[C@@](O)([C@H](N(CC=C)CC3)C4)CC1	71774987	1	Roy et al. ACS Omega. 2019; 4(16):16774-16780. DOI: 10.1021/acsomega.9b01512
375	O=C1[C@@H]2Oc3c(O)ccc4c3[C@@]32[C@@](O)([C@H](N(C/C=C(\C)/C)CC3)C4)CC1	NA	1	Roy et al. ACS Omega. 2019; 4(16):16774-16780. DOI: 10.1021/acsomega.9b01512
376	O=C1[C@@H]2Oc3c(O)ccc4c3[C@@]32[C@@](O)([C@H](N(C)CC3)C4)CC1	NA	1	Roy et al. ACS Omega. 2019; 4(16):16774-16780. DOI: 10.1021/acsomega.9b01512
377	O=C1[C@@H]2Oc3c(O)ccc4c3[C@@]32[C@@](NCCCCC)([C@H](N(C)CC3)C4)C=C1	NA	1	Roy et al. ACS Omega. 2019; 4(16):16774-16780. DOI: 10.1021/acsomega.9b01512
378	O=C1[C@@H](N2C(=O)c3c(C2=O)cccc3)CCC(=O)N1	92142	1	Roy et al. ACS Omega. 2019; 4(16):16774-16780. DOI: 10.1021/acsomega.9b01512
379	O=C1[C@@H](N2C(=O)[C@H]3[C@@H](C2=O)[C@H]2C[C@@H]3CC2)CCC(=O)N1	NA	1	Roy et al. ACS Omega. 2019; 4(16):16774-16780. DOI: 10.1021/acsomega.9b01512
380	O=C1[C@@H](N)CC[S@](#C)(C[C@@H]2[C@@H](O)[C@H](O)[C@@H](n3c4NC=N[C@H](N)c4nc3)O2)O1	NA	1	Roy et al. ACS Omega. 2019; 4(16):16774-16780. DOI: 10.1021/acsomega.9b01512
381	O=C1[C@@H](CN2CCOCC2)CCc2[nH]c(C)c(CC)c12	29935496	1	Roy et al. ACS Omega. 2019; 4(16):16774-16780. DOI: 10.1021/acsomega.9b01512
382	O=C1[C@@H](Cc2ccccc2)NC(=O)[C@@H](CC(C)C)NC(=O)[C@H](CCCN)NC(=O)[C@H](CC)NC(=O)[C@@H]2N(C(=O)[C@@H](Cc3ccccc3)NC(=O)[C@H](CC(C)C)NC(=O)[C@@H](CCCN)NC(=O)[C@H](C(C)C)NC(=O)[C@H]3N1CCC3)CCC2	NA	0	Roy et al. ACS Omega. 2019; 4(16):16774-16780. DOI: 10.1021/acsomega.9b01512
383	O=C1[C@@H](CC)[C@@](C)(c2ccccc2)C(=O)N1	92160333	1	Roy et al. ACS Omega. 2019; 4(16):16774-16780. DOI: 10.1021/acsomega.9b01512
384	O=C1[C@@H](c2sccc2)NCCN1	52539208	1	Roy et al. ACS Omega. 2019; 4(16):16774-16780. DOI: 10.1021/acsomega.9b01512
385	O=C1[C@@H](c2ccccc2)OC(NCC)=N1	135564833	1	Roy et al. ACS Omega. 2019; 4(16):16774-16780. DOI: 10.1021/acsomega.9b01512
386	O=C1[C@@H](c2ccccc2)OC(NC2CC2)=N1	135564992	1	Roy et al. ACS Omega. 2019; 4(16):16774-16780. DOI: 10.1021/acsomega.9b01512
387	O=C1[C@@H](c2ccccc2)OC(N)=N1	135564941	1	Roy et al. ACS Omega. 2019; 4(16):16774-16780. DOI: 10.1021/acsomega.9b01512
388	O=C1[C@@H](c2ccccc2)OC(N(C)C)=N1	76957099	1	Roy et al. ACS Omega. 2019; 4(16):16774-16780. DOI: 10.1021/acsomega.9b01512
389	O=C1[C@@H](C(C)C)NC(=O)[C@@H](C)OC(=O)[C@@H](C(C)C)NC(=O)[C@@H](C)COC(=O)[C@@H](C(C)C)NC(=O)[C@@H](C)OC(=O)[C@H](C(C)C)NC(=O)[C@@H](C)COC(=O)[C@@H](C(C)C)NC(=O)[C@H](C)OC(=O)[C@H](C(C)C)NC(=O)[C@@H](C(C)C)O1	NA	0	Roy et al. ACS Omega. 2019; 4(16):16774-16780. DOI: 10.1021/acsomega.9b01512
390	O=C1[C@@]2(O)O[C@@H]3[C@@H](NC)[C@H](O)[C@@H](NC)[C@H](O)[C@H]3O[C@@H]2O[C@H](CCCC)C1	NA	0	Roy et al. ACS Omega. 2019; 4(16):16774-16780. DOI: 10.1021/acsomega.9b01512
391	O=C1[C@@]2(NC(=O)N1)Cc1c(cccc1)CC2	1268112	1	Roy et al. ACS Omega. 2019; 4(16):16774-16780. DOI: 10.1021/acsomega.9b01512
392	O=C1[C@@]2(c3c(C(=O)CC2)cccc3)CCC(=O)N1	76966688	1	Roy et al. ACS Omega. 2019; 4(16):16774-16780. DOI: 10.1021/acsomega.9b01512
393	O=C1[C@@](NCC)(c2sccc2)CCCC1	6604469	1	Roy et al. ACS Omega. 2019; 4(16):16774-16780. DOI: 10.1021/acsomega.9b01512
394	O=C1[C@@](CCN(C)C)(c2ccccc2)CCc2c1cccc2	65834	1	Roy et al. ACS Omega. 2019; 4(16):16774-16780. DOI: 10.1021/acsomega.9b01512
395	O=C1[C@@](CC)(c2ccc(N)cc2)CCC(=O)N1	86488	1	Roy et al. ACS Omega. 2019; 4(16):16774-16780. DOI: 10.1021/acsomega.9b01512
396	O=C1[C@@](CC)(C)CC(=O)N1	6603844	1	Roy et al. ACS Omega. 2019; 4(16):16774-16780. DOI: 10.1021/acsomega.9b01512
397	O=C1[C@@]([C@@H](C#CCC)C)(CC=C)[C@H](O)N(C)[C@@H](O)N1	NA	1	Roy et al. ACS Omega. 2019; 4(16):16774-16780. DOI: 10.1021/acsomega.9b01512
398	O=C[C@]1(O)[C@@H](O[C@H]2[C@H](NC)[C@@H](O)[C@H](O)[C@@H](CO)O2)[C@H](O[C@@H]2[C@@H](O)[C@@H](O)[C@H](N[C-]([N+H3])N)[C@@H](O)[C@H]2N[C-]([N+H3])N)O[C@H]1C	NA	0	Roy et al. ACS Omega. 2019; 4(16):16774-16780. DOI: 10.1021/acsomega.9b01512
399	O=C[C@]1(O)[C@@H](O[C@H]2[C@@H](NC)[C@H](O)[C@@H](O)[C@H](CO)O2)[C@H](O[C@@H]2[C@@H](O)[C@H](O)[C@@H](NC(N)N)[C@H](O)[C@H]2N[C-]([N+H3])N)O[C@H]1C	NA	0	Roy et al. ACS Omega. 2019; 4(16):16774-16780. DOI: 10.1021/acsomega.9b01512
400	O=C(OCOC)[C@H]1C(C)(C)S[C@H]2[C@@H](N3C(=O)[C@@H](c4ccc(O)cc4)NC3(C)C)C(=O)N12	129360364	0	Roy et al. ACS Omega. 2019; 4(16):16774-16780. DOI: 10.1021/acsomega.9b01512
401	O=C(OCOC)[C@@H]1C(C)(C)S[C@@H]2[C@H](N3C(=O)[C@H](c4ccccc4)NC3(C)C)C(=O)N12	NA	0	Roy et al. ACS Omega. 2019; 4(16):16774-16780. DOI: 10.1021/acsomega.9b01512
402	O=C(OCOC(=O)[C@@H]1C(C)(C)S[C@H]2[C@@H](/N=C/N3CCCCCC3)C(=O)N12)C(C)(C)C	92402755	0	Roy et al. ACS Omega. 2019; 4(16):16774-16780. DOI: 10.1021/acsomega.9b01512
403	O=C(OCCOCn1c2N=C(N)NC(=O)c2nc1)[C@@H](N)C(C)C	135398742	1	Roy et al. ACS Omega. 2019; 4(16):16774-16780. DOI: 10.1021/acsomega.9b01512
404	O=C(OCCN1[C@@H](C)[C@H](c2ccccc2)OCC1)[C@H](CC)c1ccccc1	76960268	1	Roy et al. ACS Omega. 2019; 4(16):16774-16780. DOI: 10.1021/acsomega.9b01512
405	O=C(OCCN(CC)CC)[C@@H]1C(C)(C)S[C@H]2[C@@H](NC(=O)c3c(OC)cccc3OC)C(=O)N12	73951848	0	Roy et al. ACS Omega. 2019; 4(16):16774-16780. DOI: 10.1021/acsomega.9b01512
406	O=C(OCCC)N2C[C@@]([H])(CN1CCCC1)N(CC2)C(=O)C/C3=C/C([Cl])=C([Cl])C=C3	44310302	1	Shen et al. J Chem Inf Model. 2010;50(6):1034-1041. DOI: 10.1021/ci100104j
407	O=C(OCCC)c1n([C@@H](C)c2ccccc2)cnc1	14305186	1	Roy et al. ACS Omega. 2019; 4(16):16774-16780. DOI: 10.1021/acsomega.9b01512
408	O=C(OCc1scnc1)N[C@@H]([C@@H](O)C[C@H](NC(=O)[C@H](NC(=O)N(Cc1nc(C(C)C)sc1)C)C(C)C)Cc1ccccc1)Cc1ccccc1	93535511	0	Roy et al. ACS Omega. 2019; 4(16):16774-16780. DOI: 10.1021/acsomega.9b01512
409	O=C(OCc1cc(OC(=O)[C@H]2C(C)(C)S[C@H]3[C@@H](NC(=O)Cc4ccccc4)C(=O)N23)ccc1)C(C)C	NA	0	Roy et al. ACS Omega. 2019; 4(16):16774-16780. DOI: 10.1021/acsomega.9b01512
410	O=C(OCC1=C(C(=O)O)N2C(=O)[C@H](NC(=O)/C(=N/OC)/c3occc3)[C@@H]2SC1)N	40467103	0	Roy et al. ACS Omega. 2019; 4(16):16774-16780. DOI: 10.1021/acsomega.9b01512
411	O=C(OCC1=C(C(=O)O)N2C(=O)[C@H](NC(=O)/C(=C/CC)/c3nc(N)sc3)[C@H]2SC1)N	NA	0	Roy et al. ACS Omega. 2019; 4(16):16774-16780. DOI: 10.1021/acsomega.9b01512
412	O=C(OCC1=C(C(=O)O)N2C(=O)[C@](OC)(NC(=O)Cc3sccc3)[C@H]2SC1)N	6102292	0	Roy et al. ACS Omega. 2019; 4(16):16774-16780. DOI: 10.1021/acsomega.9b01512
413	O=C(OCC1=C(C(=O)O)N2C(=O)[C@@H]([C@@H](O)C)[C@@H]2S1)N	NA	0	Roy et al. ACS Omega. 2019; 4(16):16774-16780. DOI: 10.1021/acsomega.9b01512
414	O=C(OCC=1[C@@H]2[C@@H]([C@H](OC(=O)CC(C)C)OC=1)[C@@]1([C@H](OC(=O)C)C2)OC1)CC(C)C	125121599	1	Roy et al. ACS Omega. 2019; 4(16):16774-16780. DOI: 10.1021/acsomega.9b01512
415	O=C(OCC)O[C@]1(C(=O)COC(=O)CC)[C@]2(C)[C@@H]([C@@H]3[C@@H]([C@H](O)C2)[C@]2(C)C(=CC(=O)C=C2)CC3)CC1	124762054	1	Roy et al. ACS Omega. 2019; 4(16):16774-16780. DOI: 10.1021/acsomega.9b01512
416	O=C(OCC)O[C@@H]1[C@@H](O[C@@H]2[C@@H](C)[C@@H](O[C@@H]3O[C@@H](C)[C@H](O)[C@@](OC)(C)C3)[C@H](C)C(=O)O[C@H](CC)[C@](O)(C)[C@H](O)[C@@H](C)C(=O)[C@H](C)C[C@@]2(O)C)O[C@@H](C)C[C@H]1N(C)C	NA	0	Roy et al. ACS Omega. 2019; 4(16):16774-16780. DOI: 10.1021/acsomega.9b01512
417	O=C(OCC)NN[C@H](C)c1ccccc1	76967985	1	Roy et al. ACS Omega. 2019; 4(16):16774-16780. DOI: 10.1021/acsomega.9b01512
418	O=C(OCC)CCC(=O)O[C@H]1[C@H](O[C@@H]2[C@H](C)[C@H](O[C@H]3O[C@H](C)[C@@H](O)[C@](OC)(C)C3)[C@@H](C)C(=O)O[C@@H](CC)[C@@](O)(C)[C@@H](O)[C@@H](C)C(=O)[C@H](C)C[C@]2(O)C)O[C@H](C)C[C@@H]1N(C)C	NA	0	Roy et al. ACS Omega. 2019; 4(16):16774-16780. DOI: 10.1021/acsomega.9b01512
419	O=C(OCC)c1n([C@@H](C)c2ccccc2)cnc1	6338045	1	Roy et al. ACS Omega. 2019; 4(16):16774-16780. DOI: 10.1021/acsomega.9b01512
420	O=C(OCC)[C@@H](N[C@H](C(=O)N1[C@H](C(=O)O)CCC1)C)CCc1ccccc1	5388962	0	Roy et al. ACS Omega. 2019; 4(16):16774-16780. DOI: 10.1021/acsomega.9b01512
421	O=C(OCC)[C@@]1([C@H](N(C)C)C=CCC1)c1ccccc1	11086942	1	Roy et al. ACS Omega. 2019; 4(16):16774-16780. DOI: 10.1021/acsomega.9b01512
422	O=C(OCC(COC(=O)C)CCn1c2NC(N)=NCc2nc1)C	4713249	1	Roy et al. ACS Omega. 2019; 4(16):16774-16780. DOI: 10.1021/acsomega.9b01512
423	O=C(OCC(=O)[C@]1(O)C[C@H](O[C@H]2O[C@H](C)[C@@H](O)[C@H](N)C2)c2c(O)c3C(=O)c4c(OC)cccc4C(=O)c3c(O)c2C1)C(OCC)OCC	NA	0	Roy et al. ACS Omega. 2019; 4(16):16774-16780. DOI: 10.1021/acsomega.9b01512
424	O=C(OCC(=O)[C@]1(O)[C@H](C)C[C@@H]2[C@@]1(C)C[C@H](O)[C@H]1[C@@]3(C)C(C(C)=C[C@@H]21)=Cc1n(-c2ccccc2)ncc1C3)C	NA	1	Roy et al. ACS Omega. 2019; 4(16):16774-16780. DOI: 10.1021/acsomega.9b01512
425	O=C(OCC(=O)[C@]1(O)[C@]2(C)[C@H]([C@H]3[C@H]([C@H](O)C2)[C@@]2(C)C(=CC(=O)C=C2)CC3)CC1)CN(CC)CC	NA	1	Roy et al. ACS Omega. 2019; 4(16):16774-16780. DOI: 10.1021/acsomega.9b01512
426	O=C(OCC(=O)[C@]1(O)[C@]2(C)[C@@H]([C@@H]3[C@@H](C(=O)C2)[C@@]2(C)C(=CC(=O)CC2)CC3)CC1)C	40467135	1	Roy et al. ACS Omega. 2019; 4(16):16774-16780. DOI: 10.1021/acsomega.9b01512
427	O=C(OCC(=O)[C@]1(O)[C@]2(C)[C@@H]([C@@H]3[C@@H]([C@H](O)C2)[C@@]2(C)C(=CC(=O)C=C2)CC3)CC1)CCC(=O)O	NA	1	Roy et al. ACS Omega. 2019; 4(16):16774-16780. DOI: 10.1021/acsomega.9b01512
428	O=C(OCC(=O)[C@]1(O)[C@]2(C)[C@@H]([C@@H]3[C@@H]([C@H](O)C2)[C@@]2(C)C(=CC(=O)C=C2)CC3)CC1)CC(C)(C)C	NA	1	Roy et al. ACS Omega. 2019; 4(16):16774-16780. DOI: 10.1021/acsomega.9b01512
429	O=C(OCC(=O)[C@]1(O)[C@]2(C)[C@@H]([C@@H]3[C@@H]([C@H](O)C2)[C@@]2(C)C(=CC(=O)C=C2)CC3)CC1)C	NA	1	Roy et al. ACS Omega. 2019; 4(16):16774-16780. DOI: 10.1021/acsomega.9b01512
430	O=C(OCC(=O)[C@]1(O)[C@]2(C)[C@@H]([C@@H]3[C@@H]([C@H](O)C2)[C@@]2(C)C([C@H](C)C3)=CC(=O)C=C2)CC1)C	NA	1	Roy et al. ACS Omega. 2019; 4(16):16774-16780. DOI: 10.1021/acsomega.9b01512
431	O=C(OCC(=O)[C@]1(O)[C@]2(C)[C@@H]([C@@H]3[C@@H]([C@@H](O)C2)[C@@]2(C)C(=CC(=O)CC2)CC3)CC1)CCC1CCCC1	NA	1	Roy et al. ACS Omega. 2019; 4(16):16774-16780. DOI: 10.1021/acsomega.9b01512
432	O=C(OCC(=O)[C@@]12[C@@]3(C)[C@H]([C@H]4[C@H]([C@@H](O)C3)[C@]3(C)C(=CC(=O)C=C3)CC4)C[C@@H]1OC(C)=N2)C	NA	1	Roy et al. ACS Omega. 2019; 4(16):16774-16780. DOI: 10.1021/acsomega.9b01512
433	O=C(OCC(=O)[C@@]12[C@@]3(C)[C@@H]([C@@H]4[C@H]([C@@H](O)C3)[C@@]3(C)C(=CC(=O)C=C3)CC4)C[C@H]1O[C@@H](C1CCCCC1)O2)C(C)C	NA	1	Roy et al. ACS Omega. 2019; 4(16):16774-16780. DOI: 10.1021/acsomega.9b01512
434	O=C(OCC(=O)[C@@]1(O)[C@@]2(C)[C@H]([C@H]3[C@H]([C@H](O)C2)[C@]2(C)C(=CC(=O)CC2)CC3)CC1)CCC(=O)O	NA	1	Roy et al. ACS Omega. 2019; 4(16):16774-16780. DOI: 10.1021/acsomega.9b01512
435	O=C(OCC(=O)[C@@]1(O)[C@@]2(C)[C@H]([C@H]3[C@H]([C@H](O)C2)[C@]2(C)C(=CC(=O)CC2)CC3)CC1)C	124909221	1	Roy et al. ACS Omega. 2019; 4(16):16774-16780. DOI: 10.1021/acsomega.9b01512
436	O=C(OCC(=O)[C@@]1(O)[C@@]2(C)[C@H]([C@H]3[C@H]([C@@H](O)C2)[C@]2(C)C([C@@H](C)C3)=CC(=O)C=C2)CC1)CCC(=O)O	NA	1	Roy et al. ACS Omega. 2019; 4(16):16774-16780. DOI: 10.1021/acsomega.9b01512
437	O=C(OCC(=O)[C@@]1(O)[C@@]2(C)[C@H]([C@H]3[C@H]([C@@H](O)C2)[C@@]2(C)C(=CC(=O)CC2)CC3)CC1)CN(CC)CC	NA	1	Roy et al. ACS Omega. 2019; 4(16):16774-16780. DOI: 10.1021/acsomega.9b01512
438	O=C(OCC(=O)[C@@]1(O)[C@@]2(C)[C@H]([C@H]3[C@H]([C@@H](O)C2)[C@@]2(C)C(=CC(=O)C=C2)CC3)CC1)COC(=O)CCCCCCCCCCCCCCCCC	NA	1	Roy et al. ACS Omega. 2019; 4(16):16774-16780. DOI: 10.1021/acsomega.9b01512
439	O=C(OCC([C@H](CC)C)(COC(=O)N)C)N	76963478	1	Roy et al. ACS Omega. 2019; 4(16):16774-16780. DOI: 10.1021/acsomega.9b01512
440	O=C(OC1CN2CCC1CC2)c3ccccc3	65630	1	Zhao et al. J Chem Inf Model. 2007;47(1):170–175. DOI:10.1021/ci600312d
441	O=C(Oc1ccccc1)[C@H](C(=O)N[C@H]1C(=O)N2[C@@H](C(=O)O)C(C)(C)S[C@H]12)c1ccccc1	NA	0	Roy et al. ACS Omega. 2019; 4(16):16774-16780. DOI: 10.1021/acsomega.9b01512
442	O=C(Oc1cc2c(cc1)CCC2)[C@H](C(=O)N[C@@H]1C(=O)N2[C@H](C(=O)O)C(C)(C)S[C@@H]12)c1ccccc1	NA	0	Roy et al. ACS Omega. 2019; 4(16):16774-16780. DOI: 10.1021/acsomega.9b01512
443	O=C(Oc1cc2[C@]3(C)[C@H](N(C)c2cc1)N(C)CC3)NC	667498	1	Roy et al. ACS Omega. 2019; 4(16):16774-16780. DOI: 10.1021/acsomega.9b01512
444	O=C(Oc1cc2[C@@]3(C)[C@@H](N(C)c2cc1)N(C)CC3)NCCCCCCC	65872	1	Roy et al. ACS Omega. 2019; 4(16):16774-16780. DOI: 10.1021/acsomega.9b01512
445	O=C(Oc1cc2[C@@]3(C)[C@@H](N(C)c2cc1)N(C)CC3)Nc1ccccc1	192706	1	Roy et al. ACS Omega. 2019; 4(16):16774-16780. DOI: 10.1021/acsomega.9b01512
446	O=C(Oc1cc2[C@@]3(C)[C@@H](N(C)c2cc1)N(C)CC3)N1Cc2c(cccc2)CC1	132228	1	Roy et al. ACS Omega. 2019; 4(16):16774-16780. DOI: 10.1021/acsomega.9b01512
447	O=C(OC1CC[N+](C)([C-H2])CC1)[C@H]([C@@H](CC)C)c1ccccc1	NA	0	Roy et al. ACS Omega. 2019; 4(16):16774-16780. DOI: 10.1021/acsomega.9b01512
448	O=C(Oc1cc([C@@H](O)CNC)ccc1)C(C)(C)C	12303425	0	Roy et al. ACS Omega. 2019; 4(16):16774-16780. DOI: 10.1021/acsomega.9b01512
449	O=C(Oc1cc([C@@H](N(C)C)C)ccc1)N(CC)C	77991	1	Roy et al. ACS Omega. 2019; 4(16):16774-16780. DOI: 10.1021/acsomega.9b01512
450	O=C(Oc1c2c(OC(C)(C)C3=C2C[C@@H](C)CC3)cc([C@@H]([C@@H](CCCCC)C)C)c1)CCCN1CCCCCC1	76957068	1	Roy et al. ACS Omega. 2019; 4(16):16774-16780. DOI: 10.1021/acsomega.9b01512
451	O=C(OC1C[C@@H]2N(C)[C@H](C1)CC2)[C@H](CO)c1ccccc1	154417	1	Roy et al. ACS Omega. 2019; 4(16):16774-16780. DOI: 10.1021/acsomega.9b01512
452	O=C(OC1C[C@@H]2N(C)[C@H](C1)CC2)[C@@H](O)c1ccccc1	688024	1	Roy et al. ACS Omega. 2019; 4(16):16774-16780. DOI: 10.1021/acsomega.9b01512
453	O=C(OC1C[C@@H]2N(C)[C@H](C1)CC2)[C@@](CO)(C)c1ccccc1	20055097	1	Roy et al. ACS Omega. 2019; 4(16):16774-16780. DOI: 10.1021/acsomega.9b01512
454	O=C(OC1C[C@@H]2[N+]([O-])(C)[C@H](C1)CC2)[C@@H](CO)c1ccccc1	5771580	1	Roy et al. ACS Omega. 2019; 4(16):16774-16780. DOI: 10.1021/acsomega.9b01512
455	O=C(Oc1c(OC(=O)C(C)(C)C)ccc([C@@H](O)CNC)c1)C(C)(C)C	1150214	0	Roy et al. ACS Omega. 2019; 4(16):16774-16780. DOI: 10.1021/acsomega.9b01512
456	O=C(OC=1[C@H]2Oc3c(OC)ccc4c3[C@]32[C@H]([C@@H](N(C)CC3)C4)CC=1)C	NA	1	Roy et al. ACS Omega. 2019; 4(16):16774-16780. DOI: 10.1021/acsomega.9b01512
457	O=C(OC[C@H]1[N+](C)([C-H2])CCCC1)C(O)(c1ccccc1)c1ccccc1	NA	0	Roy et al. ACS Omega. 2019; 4(16):16774-16780. DOI: 10.1021/acsomega.9b01512
458	O=C(OC[C@H]1[C@@]2(OC)N(C=3C(=O)C(C)=C(N)C(=O)C1=3)C[C@@H]1N[C@H]21)N	15560563	0	Roy et al. ACS Omega. 2019; 4(16):16774-16780. DOI: 10.1021/acsomega.9b01512
459	O=C(OC[C@H](OCn1c2N=C(N)NC(=O)c2nc1)CO)[C@@H](N)C(C)C	135483663	1	Roy et al. ACS Omega. 2019; 4(16):16774-16780. DOI: 10.1021/acsomega.9b01512
460	O=C(OC[C@]([C@@H](CC)C)(COC(=O)N)C)NC(C)C	76968209	1	Roy et al. ACS Omega. 2019; 4(16):16774-16780. DOI: 10.1021/acsomega.9b01512
461	O=C(OC[C@@H]1O[C@](CCCCCCCCC)(C)OC1)N	76959252	1	Roy et al. ACS Omega. 2019; 4(16):16774-16780. DOI: 10.1021/acsomega.9b01512
462	O=C(OC[C@@](O)(CC)c1ccccc1)N	69537478	1	Roy et al. ACS Omega. 2019; 4(16):16774-16780. DOI: 10.1021/acsomega.9b01512
463	O=C(OC[C@@](COC(=O)N)(CCC)C)NCCCC	76965346	1	Roy et al. ACS Omega. 2019; 4(16):16774-16780. DOI: 10.1021/acsomega.9b01512
464	O=C(OC)c1n([C@H](C)c2ccccc2)cnc1	1129903	1	Roy et al. ACS Omega. 2019; 4(16):16774-16780. DOI: 10.1021/acsomega.9b01512
465	O=C(OC)[C@H]1[C@H](OC)[C@@H](OC(=O)c2cc(OC)c(OC)c(OC)c2)C[C@@H]2[C@@H]1C[C@H]1[N@](C2)CCc2c3c([nH]c12)cccc3	NA	1	Roy et al. ACS Omega. 2019; 4(16):16774-16780. DOI: 10.1021/acsomega.9b01512
466	O=C(OC)[C@H]1[C@@](O)(CC)C[C@H](O[C@H]2O[C@H](C)[C@H](O[C@H]3O[C@@H](C)[C@@H](O[C@H]4O[C@@H](C)C(=O)CC4)[C@@H](O)C3)[C@@H](N(C)C)C2)c2c(O)c3C(=O)c4c(O)cccc4C(=O)c3cc12	NA	0	Roy et al. ACS Omega. 2019; 4(16):16774-16780. DOI: 10.1021/acsomega.9b01512
467	O=C(OC)[C@H]([C@H]1NCCCC1)c1ccccc1	10657292	1	Roy et al. ACS Omega. 2019; 4(16):16774-16780. DOI: 10.1021/acsomega.9b01512
468	O=C(OC)[C@@H]1[C@@H](OC)[C@H](OC)C[C@H]2[C@H]1C[C@H]1[N@](C2)CCc2c3c([nH]c12)cc(OC)cc3	NA	1	Roy et al. ACS Omega. 2019; 4(16):16774-16780. DOI: 10.1021/acsomega.9b01512
469	O=C(OC(C)(C)C)N[C@@H]([C@@H](O)C(=O)O[C@@H]1[C@H](C)[C@@H]2[C@@H](O)C(=O)[C@@]3(C)[C@@H](O)C[C@H]4[C@@](OC(=O)C)([C@H]3[C@H](OC(=O)c3ccccc3)[C@@](O)(C2(C)C)C1)CO4)c1ccccc1	NA	0	Roy et al. ACS Omega. 2019; 4(16):16774-16780. DOI: 10.1021/acsomega.9b01512
470	O=C(O[C@H]1OC=C(COC(=O)C)C=2[C@H]1[C@]1([C@@H](OC(=O)CC(C)C)C=2)OC1)CC(OC(=O)C)(C)C	NA	1	Roy et al. ACS Omega. 2019; 4(16):16774-16780. DOI: 10.1021/acsomega.9b01512
471	O=C(O[C@H]1OC=C(COC(=O)C)C=2[C@@H]1[C@@]1([C@H](OC(=O)CC(C)C)C=2)OC1)CC(C)C	124566782	1	Roy et al. ACS Omega. 2019; 4(16):16774-16780. DOI: 10.1021/acsomega.9b01512
472	O=C(O[C@H]1OC(=O)[C@@H]2[C@H]1[C@H]1C=C[C@@H]2C1)NC	NA	1	Roy et al. ACS Omega. 2019; 4(16):16774-16780. DOI: 10.1021/acsomega.9b01512
473	O=C(O[C@H]1CC=2[C@@](C)([C@H]3[C@H]([C@@H]4[C@](C)([C@H](C(=O)C)CC4)CC3)CC=2)CC1)CCC(=O)O	NA	1	Roy et al. ACS Omega. 2019; 4(16):16774-16780. DOI: 10.1021/acsomega.9b01512
474	O=C(O[C@H]1C2CCN(C1)CC2)c1ccccc1	6918883	1	Roy et al. ACS Omega. 2019; 4(16):16774-16780. DOI: 10.1021/acsomega.9b01512
475	O=C(O[C@H]1C[C@@H](C)CC(C)(C)C1)[C@H]1NC(=O)CC1	23623629	1	Roy et al. ACS Omega. 2019; 4(16):16774-16780. DOI: 10.1021/acsomega.9b01512
476	O=C(O[C@H]1[C@H](O[C@H]2[C@H](C)[C@H](O[C@H]3O[C@H](C)[C@@H](O)[C@](OC)(C)C3)[C@@H](C)C(=O)O[C@@H](CC)[C@@](O)(C)[C@@H](O)[C@H](C)C(=O)[C@@H](C)C[C@]2(O)C)O[C@H](C)C[C@@H]1N(C)C)CC	NA	0	Roy et al. ACS Omega. 2019; 4(16):16774-16780. DOI: 10.1021/acsomega.9b01512
477	O=C(O[C@H]1[C@H](C)[C@@H](C)OC(=O)[C@H](C)[C@H](O[C@@H]2O[C@H](C)[C@@H](OC(=O)C)[C@H](OC)C2)[C@@H](C)[C@H](O[C@H]2[C@H](OC(=O)C)[C@@H](N(C)C)C[C@H](C)O2)[C@H](C)C[C@@]2(C(=O)[C@H]1C)OC2)C	NA	0	Roy et al. ACS Omega. 2019; 4(16):16774-16780. DOI: 10.1021/acsomega.9b01512
478	O=C(O[C@H]1[C@H](C(=O)N(CC)CC)C[N@@]2[C@H](c3c(cc(OC)c(OC)c3)CC2)C1)C	23615589	1	Roy et al. ACS Omega. 2019; 4(16):16774-16780. DOI: 10.1021/acsomega.9b01512
479	O=C(O[C@H]1[C@@H]2Oc3c(OCc4ccccc4)ccc4c3[C@@]32[C@@H]([C@H](N(C)CC3)C4)C=C1)CCCCCCCCCCCCC	NA	1	Roy et al. ACS Omega. 2019; 4(16):16774-16780. DOI: 10.1021/acsomega.9b01512
480	O=C(O[C@H]1[C@@H]2Oc3c(OC)ccc4c3[C@@]32[C@@H]([C@H](N(C)CC3)C4)CC1)c1cnccc1	NA	1	Roy et al. ACS Omega. 2019; 4(16):16774-16780. DOI: 10.1021/acsomega.9b01512
481	O=C(O[C@H]1[C@@H]2Oc3c(OC(=O)c4cnccc4)ccc4c3[C@@]32[C@H]([C@H](N(C)CC3)C4)C=C1)c1cnccc1	NA	1	Roy et al. ACS Omega. 2019; 4(16):16774-16780. DOI: 10.1021/acsomega.9b01512
482	O=C(O[C@H]1[C@@H]2Oc3c(OC(=O)C)ccc4c3[C@@]32[C@H]([C@H](N(C)CC3)C4)C=C1)C	12877592	1	Roy et al. ACS Omega. 2019; 4(16):16774-16780. DOI: 10.1021/acsomega.9b01512
483	O=C(O[C@H]1[C@@H]2[C@@H](CC[C@H]3OC(=O)C[C@@H](O)C3)[C@H](C)C=CC2=C[C@@H](C)C1)C(CC)(C)C	NA	1	Roy et al. ACS Omega. 2019; 4(16):16774-16780. DOI: 10.1021/acsomega.9b01512
484	O=C(O[C@H]1[C@@H](C)O[C@H](O[C@@H]2[C@@H](N(C)C)[C@@H](O)[C@H](O[C@H]3[C@H](OC)[C@@H](OC(=O)C)CC(=O)O[C@@H](C)C/C=C/C=C\[C@H](O)[C@H](C)C[C@@H]3CC=O)O[C@@H]2C)C[C@]1(O)C)CC(C)C	NA	0	Roy et al. ACS Omega. 2019; 4(16):16774-16780. DOI: 10.1021/acsomega.9b01512
485	O=C(O[C@H]1[C@@H](C)[C@H]2[C@@H](OC(=O)C)C(=O)[C@]3(C)[C@H](O)C[C@@H]4[C@@](OC(=O)C)([C@H]3[C@H](OC(=O)c3ccccc3)[C@](O)(C2(C)C)C1)CO4)[C@@H](O)[C@@H](NC(=O)c1ccccc1)c1ccccc1	NA	0	Roy et al. ACS Omega. 2019; 4(16):16774-16780. DOI: 10.1021/acsomega.9b01512
486	O=C(O[C@H]1[C@@H](C)[C@H](O)[C@H](C)[C@H](O)[C@H](C)/C=C/C=C(\C)/C(=O)N[C@H]2C(=O)c3c(O)c(C)c4O[C@](C)(C(=O)c4c3C=3NC4(NC2=3)CCN(CC(C)C)CC4)O/C=C/[C@@H](OC)[C@H]1C)C	NA	0	Roy et al. ACS Omega. 2019; 4(16):16774-16780. DOI: 10.1021/acsomega.9b01512
487	O=C(O[C@H]1[C@@H](C)[C@H](O)[C@@H](C)[C@H](O)[C@H](C)/C=C\C=C(\C)/C(=O)Nc2c(/C=N/N3CCN(C)CC3)c(O)c3c(c(O)c(C)c4O[C@@](C)(C(=O)c34)O/C=C/[C@H](OC)[C@H]1C)c2O)C	NA	0	Roy et al. ACS Omega. 2019; 4(16):16774-16780. DOI: 10.1021/acsomega.9b01512
488	O=C(O[C@H]1[C@@H](C)[C@H](O)[C@@H](C)[C@@H](O)[C@H](C)/C=C\C=C(\C)/C(=O)Nc2c(/C=N/N3CCN(C4CCCC4)CC3)c(O)c3c(c(O)c(C)c4O[C@@](C)(C(=O)c34)O/C=C/[C@@H](OC)[C@H]1C)c2O)C	NA	0	Roy et al. ACS Omega. 2019; 4(16):16774-16780. DOI: 10.1021/acsomega.9b01512
489	O=C(O[C@H]1[C@@H](C)[C@@H](O)[C@H](C)[C@@H](O)[C@@H](C)/C=C\C=C(\C)/C(=O)Nc2c(O)c3c(O)c(C)c4O[C@@](C)(C(=O)c4c3c(O)c2)O/C=C/[C@H](OC)[C@H]1C)C	NA	0	Roy et al. ACS Omega. 2019; 4(16):16774-16780. DOI: 10.1021/acsomega.9b01512
490	O=C(O[C@H]1[C@@H](C)[C@@H](O)[C@H](C)[C@@H](O)[C@@H](C)/C=C/C=C(\C)/C(=O)Nc2c(/C=N/N=C(/N(CC)CC)\C)c(O)c3c(c(O)c(C)c4O[C@@](C)(C(=O)c34)O/C=C/[C@@H](OC)[C@H]1C)c2O)C	NA	0	Roy et al. ACS Omega. 2019; 4(16):16774-16780. DOI: 10.1021/acsomega.9b01512
491	O=C(O[C@]1(C(=O)COC(=O)CC)[C@@]2(C)[C@@H]([C@@H]3[C@@H]([C@@H](O)C2)[C@]2(C)C(=CC(=O)CC2)CC3)CC1)CCC	125038333	1	Roy et al. ACS Omega. 2019; 4(16):16774-16780. DOI: 10.1021/acsomega.9b01512
492	O=C(O[C@]1(C(=O)COC(=O)C)[C@@]2(C)[C@@H]([C@@H]3[C@H]([C@@H](O)C2)[C@@]2(C)C([C@H](C)C3)=CC(=O)C=C2)CC1)CC	NA	1	Roy et al. ACS Omega. 2019; 4(16):16774-16780. DOI: 10.1021/acsomega.9b01512
493	O=C(O[C@]1(C(=O)COC(=O)C)[C@@]2(C)[C@@H]([C@@H]3[C@@H]([C@@H](O)C2)[C@@]2(C)C([C@H](C)C3)=CC(=O)CC2)CC1)CCC	NA	1	Roy et al. ACS Omega. 2019; 4(16):16774-16780. DOI: 10.1021/acsomega.9b01512
494	O=C(O[C@]1(C(=O)CO)[C@@]2(C)[C@@H]([C@@H]3[C@H]([C@@H](O)C2)[C@@]2(C)C(=CC(=O)CC2)CC3)CC1)CCC	NA	1	Roy et al. ACS Omega. 2019; 4(16):16774-16780. DOI: 10.1021/acsomega.9b01512
495	O=C(O[C@]1(C(=O)CO)[C@@]2(C)[C@@H]([C@@H]3[C@@H]([C@@H](O)C2)[C@@]2(C)C(=CC(=O)CC2)CC3)CC1)CCCC	NA	1	Roy et al. ACS Omega. 2019; 4(16):16774-16780. DOI: 10.1021/acsomega.9b01512
496	O=C(O[C@]1(C(=O)C)[C@@]2(C)[C@@H]([C@@H]3[C@@H]([C@@H](O)C2)[C@@]2(C)C(=CC(=O)C=C2)CC3)CCC1)CCC	NA	1	Roy et al. ACS Omega. 2019; 4(16):16774-16780. DOI: 10.1021/acsomega.9b01512
497	O=C(O[C@]([C@H](CN(C)C)C)(Cc1ccccc1)c1ccccc1)CC	441275	1	Roy et al. ACS Omega. 2019; 4(16):16774-16780. DOI: 10.1021/acsomega.9b01512
498	O=C(O[C@@H]1[C@H]2Oc3c(OC(=O)C)ccc4c3[C@]32[C@@H]([C@@H](N(CC=C)CC3)C4)C=C1)C	NA	1	Roy et al. ACS Omega. 2019; 4(16):16774-16780. DOI: 10.1021/acsomega.9b01512
499	O=C(O[C@@H]1[C@H]2[C@H](CC[C@H]3OC(=O)C[C@@H](O)C3)[C@@H](C)C=CC2=CCC1)[C@@H](CC)C	NA	1	Roy et al. ACS Omega. 2019; 4(16):16774-16780. DOI: 10.1021/acsomega.9b01512
500	O=C(O[C@@H]1[C@H](c2ccc(OC)cc2)Sc2c(N(CCN(C)C)C1=O)cccc2)C	39186	0	Roy et al. ACS Omega. 2019; 4(16):16774-16780. DOI: 10.1021/acsomega.9b01512
501	O=C(O[C@@H]1[C@H](C)[C@H](O)[C@@H](C)[C@@H](O)[C@H](C)/C=C/C=C(/C)\C(=O)Nc2c(O)c3c(O)c(C)c4O[C@](C)(C(=O)c4c3c3nc(N(CC)CC)sc23)O/C=C/[C@H](OC)[C@@H]1C)C	NA	0	Roy et al. ACS Omega. 2019; 4(16):16774-16780. DOI: 10.1021/acsomega.9b01512
502	O=C(O[C@@H]1[C@H](C)[C@H](C)OC(=O)[C@@H](C)[C@@H](O[C@H]2O[C@@H](C)[C@@H](OC(=O)CC)[C@H](OC)C2)[C@@H](C)[C@@H](O[C@H]2[C@H](O)[C@@H](N(C)C)C[C@H](C)O2)[C@H](C)C[C@@]2(C(=O)[C@H]1C)OC2)CC	NA	0	Roy et al. ACS Omega. 2019; 4(16):16774-16780. DOI: 10.1021/acsomega.9b01512
503	O=C(O[C@@H]1[C@@H](OC)[C@H](OC(=O)c2cc(OC)c(OC)c(OC)c2)C[C@H]2[C@H]1C[C@H]1[N@](C2)CCc2c3c([nH]c12)cc(OC)cc3)C	NA	1	Roy et al. ACS Omega. 2019; 4(16):16774-16780. DOI: 10.1021/acsomega.9b01512
504	O=C(O[C@@H]1[C@@H](O)[C@@H](Oc2c(C)c3OC(=O)C(NC(=O)c4cc(C/C=C(\C)/C)c(O)cc4)=C(O)c3cc2)OC(C)(C)[C@H]1OC)N	NA	0	Roy et al. ACS Omega. 2019; 4(16):16774-16780. DOI: 10.1021/acsomega.9b01512
505	O=C(O[C@@H]1[C@@H](C)O[C@H](O[C@H]2[C@H](N(C)C)[C@@H](O)[C@@H](O[C@@H]3[C@@H](OC)[C@H](OC(=O)CC)CC(=O)O[C@H](C)C/C=C/C=C\[C@@H](O)[C@@H](C)C[C@H]3CC=O)O[C@H]2C)C[C@]1(O)C)CC	NA	0	Roy et al. ACS Omega. 2019; 4(16):16774-16780. DOI: 10.1021/acsomega.9b01512
506	O=C(O[C@@H]1[C@@H](C)[C@H](O)[C@H](C)[C@@H](O)[C@H](C)/C=C/C=C(\C)/C(=O)Nc2c(O)c3c(O)c(C)c4O[C@](C)(C(=O)c4c3c3nc4n(c23)C=CC(C)=C4)O/C=C\[C@@H](OC)[C@H]1C)C	NA	0	Roy et al. ACS Omega. 2019; 4(16):16774-16780. DOI: 10.1021/acsomega.9b01512
507	O=C(O[C@@H]1[C@@](O)(C(=O)OC)[C@@H]2N(C=O)c3c(cc(c(OC)c3)[C@@]3(C(=O)OC)c4[nH]c5c(c4CC[N@@]4C[C@@](O)(CC)C[C@H](C3)C4)cccc5)[C@@]32[C@H]2[C@]1(CC)C=CC[N@]2CC3)C	NA	0	Roy et al. ACS Omega. 2019; 4(16):16774-16780. DOI: 10.1021/acsomega.9b01512
508	O=C(O[C@@H]1[C@@](O)(C(=O)OC)[C@@H]2N(C)c3c(cc(c(OC)c3)[C@@]3(C(=O)OC)c4[nH]c5c(c4CC[N@@]4C[C@@](O)(CC)C[C@H](C3)C4)cccc5)[C@@]32[C@H]2[C@]1(CC)C=CC[N@]2CC3)C	NA	0	Roy et al. ACS Omega. 2019; 4(16):16774-16780. DOI: 10.1021/acsomega.9b01512
509	O=C(O[C@@]1(C(=O)COC(=O)C)[C@]2(C)[C@H]([C@H]3[C@@H]([C@H](O)C2)[C@]2(C)C(=CC(=O)CC2)CC3)CC1)CC	NA	1	Roy et al. ACS Omega. 2019; 4(16):16774-16780. DOI: 10.1021/acsomega.9b01512
510	O=C(O[C@@]1(C(=O)CO)[C@@]2(C)[C@H]([C@H]3[C@H]([C@H](O)C2)[C@]2(C)C(=CC(=O)C=C2)CC3)CC1)CCCC	NA	1	Roy et al. ACS Omega. 2019; 4(16):16774-16780. DOI: 10.1021/acsomega.9b01512
511	O=C(O[C@@]1([C@@H](C)CN(C)CC1)c1ccccc1)CC	11865413	1	Roy et al. ACS Omega. 2019; 4(16):16774-16780. DOI: 10.1021/acsomega.9b01512
512	O=C(O)COc1c(-c2ccccc2)nc2c(c1C(=O)N[C@@H](CC)c1ccccc1)cccc2	9846078	0	Roy et al. ACS Omega. 2019; 4(16):16774-16780. DOI: 10.1021/acsomega.9b01512
513	O=C(O)CCCOc1c(-c2ccccc2)nc2c(c1C(=O)N[C@@H](CC)c1ccccc1)cccc2	9912474	0	Roy et al. ACS Omega. 2019; 4(16):16774-16780. DOI: 10.1021/acsomega.9b01512
514	O=C(O)CCCC[C@H]1SC[C@H]2NC(=O)N[C@H]12	6604192	1	Roy et al. ACS Omega. 2019; 4(16):16774-16780. DOI: 10.1021/acsomega.9b01512
515	O=C(O)CC[C@H](N)C=C	10219440	1	Roy et al. ACS Omega. 2019; 4(16):16774-16780. DOI: 10.1021/acsomega.9b01512
516	O=C(O)C1=C([C@H]2OCCC2)S[C@@H]2[C@H]([C@@H](O)C)C(=O)N12	6917989	0	Roy et al. ACS Omega. 2019; 4(16):16774-16780. DOI: 10.1021/acsomega.9b01512
517	O=C(O)C[C@@H](CN)CC(C)C	5486971	1	Roy et al. ACS Omega. 2019; 4(16):16774-16780. DOI: 10.1021/acsomega.9b01512
518	O=C(O)C(C)(C)c1ccc([C@@H](O)CCCN2CCC(C(O)(c3ccccc3)c3ccccc3)CC2)cc1	6603853	0	Roy et al. ACS Omega. 2019; 4(16):16774-16780. DOI: 10.1021/acsomega.9b01512
519	O=C(O)[C@H]1c2n(c(C(=O)c3ccccc3)cc2)CC1	181818	0	Roy et al. ACS Omega. 2019; 4(16):16774-16780. DOI: 10.1021/acsomega.9b01512
520	O=C(O)[C@H]1C(C)(C)S[C@H]2[C@H](NC(=O)c3c(OCC)ccc4c3cccc4)C(=O)N12	13121776	0	Roy et al. ACS Omega. 2019; 4(16):16774-16780. DOI: 10.1021/acsomega.9b01512
521	O=C(O)[C@H]1C(C)(C)S[C@H]2[C@H](NC(=O)c3c(C)onc3-c3ccccc3)C(=O)N12	12942042	0	Roy et al. ACS Omega. 2019; 4(16):16774-16780. DOI: 10.1021/acsomega.9b01512
522	O=C(O)[C@H]1C(C)(C)S[C@H]2[C@@H](N3C(=O)[C@H](c4ccccc4)NC3(C)C)C(=O)N12	NA	0	Roy et al. ACS Omega. 2019; 4(16):16774-16780. DOI: 10.1021/acsomega.9b01512
523	O=C(O)[C@H]1C(C)(C)S[C@H]2[C@@H](N3C(=O)[C@@H](c4ccc(O)cc4)NC3(C)C)C(=O)N12	NA	0	Roy et al. ACS Omega. 2019; 4(16):16774-16780. DOI: 10.1021/acsomega.9b01512
524	O=C(O)[C@H]1C(C)(C)S[C@@H]2[C@H](NC(=O)C34CC5(N)C[C@H](C3)C[C@@H](C5)C4)C(=O)N12	168908	0	Roy et al. ACS Omega. 2019; 4(16):16774-16780. DOI: 10.1021/acsomega.9b01512
525	O=C(O)[C@H]1C(C)(C)S[C@@H]2[C@@H](NC(=O)c3c(OCC)ccc4c3cccc4)C(=O)N12	122172995	0	Roy et al. ACS Omega. 2019; 4(16):16774-16780. DOI: 10.1021/acsomega.9b01512
526	O=C(O)[C@H]1C(C)(C)S[C@@H]2[C@@H](/N=C/N3CCCCCC3)C(=O)N12	90660555	0	Roy et al. ACS Omega. 2019; 4(16):16774-16780. DOI: 10.1021/acsomega.9b01512
527	O=C(O)[C@H]1[N@@]([C@@]23C[C@@H](C)C[C@@H](C2)CCC3)CC1	NA	1	Roy et al. ACS Omega. 2019; 4(16):16774-16780. DOI: 10.1021/acsomega.9b01512
528	O=C(O)[C@H]1[C@H](O)C[C@@]2(O)O[C@@H]1C[C@@H](O[C@@H]1[C@@H](O)[C@H](N)[C@@H](O)[C@H](C)O1)/C=C/C=C/C=C\C=C\C=C\C=C\C=C\[C@H](C)[C@@H](O)[C@@H](C)[C@@H](C)OC(=O)C[C@H](O)C[C@@H](O)CC[C@@H](O)[C@@H](O)C[C@@H](O)C2	NA	0	Roy et al. ACS Omega. 2019; 4(16):16774-16780. DOI: 10.1021/acsomega.9b01512
529	O=C(O)[C@H]1[C@@H](O)C[C@@]2(O)O[C@H]1C[C@H](O[C@H]1[C@H](O)[C@@H](N)[C@H](O)[C@H](C)O1)/C=C\C=C\C=C\C=C\C=C/C=C/C=C/[C@H](C)[C@@H](O)[C@H](C)[C@@H](C)OC(=O)C[C@@H](O)C[C@H](O)C[C@H](O)CC[C@H](O)[C@@H](O)C2	NA	0	Roy et al. ACS Omega. 2019; 4(16):16774-16780. DOI: 10.1021/acsomega.9b01512
530	O=C(O)[C@H]1[C@@]2(C)[C@H]([C@H]3[C@@H]([C@H](O)C2)[C@]2(C)C([C@@H](C)C3)=CC(=O)CC2)CC1	NA	1	Roy et al. ACS Omega. 2019; 4(16):16774-16780. DOI: 10.1021/acsomega.9b01512
531	O=C(O)[C@H](NC(=O)c1ccc(N(Cc2nc3c(N)nc(N)nc3nc2)C)cc1)CCC(=O)O	72440	0	Roy et al. ACS Omega. 2019; 4(16):16774-16780. DOI: 10.1021/acsomega.9b01512
532	O=C(O)[C@H](NC(=O)C=1C(=O)[C@]2(O)C(O)=C3C(=O)c4c(O)cccc4[C@](O)(C)[C@H]3C[C@H]2[C@H](N(C)C)C=1O)N1CCN(CCO)CC1	NA	0	Roy et al. ACS Omega. 2019; 4(16):16774-16780. DOI: 10.1021/acsomega.9b01512
533	O=C(O)[C@H](NC(=O)C)CCC(=O)N	444019	1	Roy et al. ACS Omega. 2019; 4(16):16774-16780. DOI: 10.1021/acsomega.9b01512
534	O=C(O)[C@H](N)CCCC(=O)N[C@H]1C(=O)N2[C@H](C(=O)O)C(C)(C)S[C@H]12	92144411	0	Roy et al. ACS Omega. 2019; 4(16):16774-16780. DOI: 10.1021/acsomega.9b01512
535	O=C(O)[C@H](N)Cc1cc(O)c(O)cc1	92222	0	Roy et al. ACS Omega. 2019; 4(16):16774-16780. DOI: 10.1021/acsomega.9b01512
536	O=C(O)[C@H](C)c1cc(C(=O)c2ccccc2)ccc1	180540	1	Roy et al. ACS Omega. 2019; 4(16):16774-16780. DOI: 10.1021/acsomega.9b01512
537	O=C(O)[C@H](C(=O)N[C@H]1C(=O)N2[C@@H](C(=O)O)C(C)(C)S[C@H]12)c1cscc1	NA	1	Roy et al. ACS Omega. 2019; 4(16):16774-16780. DOI: 10.1021/acsomega.9b01512
538	O=C(O)[C@H](C(=O)N[C@H]1C(=O)N2[C@@H](C(=O)O)C(C)(C)S[C@H]12)c1ccccc1	92211485	0	Roy et al. ACS Omega. 2019; 4(16):16774-16780. DOI: 10.1021/acsomega.9b01512
539	O=C(O)[C@H](C(=O)N[C@@]1(OC)C(=O)N2[C@H](C(=O)O)C(C)(C)S[C@H]12)c1cscc1	NA	0	Roy et al. ACS Omega. 2019; 4(16):16774-16780. DOI: 10.1021/acsomega.9b01512
540	O=C(O)[C@@H]1CN(CNC(=O)C=2C(=O)[C@@]3(O)C(O)=C4C(=O)c5c(O)cccc5[C@@](O)(C)[C@H]4C[C@H]3[C@H](N(C)C)C=2O)CCC1	NA	0	Roy et al. ACS Omega. 2019; 4(16):16774-16780. DOI: 10.1021/acsomega.9b01512
541	O=C(O)[C@@H]1C(C)(C)S[C@@H]2[C@H](NC(=O)c3c(C(=O)O)nc4c(n3)cccc4)C(=O)N12	NA	0	Roy et al. ACS Omega. 2019; 4(16):16774-16780. DOI: 10.1021/acsomega.9b01512
542	O=C(O)[C@@H]1C(C)(C)S[C@@H]2[C@@H](NC(=O)C3(N)CCCCC3)C(=O)N12	124300955	0	Roy et al. ACS Omega. 2019; 4(16):16774-16780. DOI: 10.1021/acsomega.9b01512
543	O=C(O)[C@@H]1[C@](Cn2nncc2)(C)S(=O)(=O)[C@@H]2N1C(=O)C2	28125511	0	Roy et al. ACS Omega. 2019; 4(16):16774-16780. DOI: 10.1021/acsomega.9b01512
544	O=C(O)[C@@H](NC(=O)c1ccc(NCc2nc3C(=O)N=C(N)Nc3nc2)cc1)CCC(=O)O	135398658	1	Roy et al. ACS Omega. 2019; 4(16):16774-16780. DOI: 10.1021/acsomega.9b01512
545	O=C(O)[C@@H](NC(=O)C)CCCNC(=O)C	65977	1	Roy et al. ACS Omega. 2019; 4(16):16774-16780. DOI: 10.1021/acsomega.9b01512
546	O=C(O)[C@@H](N)CCCCNCNC(=O)C=1C(=O)[C@]2(O)C(O)=C3C(=O)c4c(O)cccc4[C@](O)(C)[C@H]3C[C@H]2[C@H](N(C)C)C=1O	NA	0	Roy et al. ACS Omega. 2019; 4(16):16774-16780. DOI: 10.1021/acsomega.9b01512
547	O=C(O)[C@@H](N)Cc1c2c([nH]c1)cccc2	6305	1	Roy et al. ACS Omega. 2019; 4(16):16774-16780. DOI: 10.1021/acsomega.9b01512
548	O=C(O)[C@@H](N)Cc1c2c([nH]c1)ccc(O)c2	439280	1	Roy et al. ACS Omega. 2019; 4(16):16774-16780. DOI: 10.1021/acsomega.9b01512
549	O=C(O)[C@@H](C)c1ccc(CC(C)C)cc1	39912	1	Roy et al. ACS Omega. 2019; 4(16):16774-16780. DOI: 10.1021/acsomega.9b01512
550	O=C(O)[C@@H](C(=O)N[C@H]1C(=O)N2[C@H](C(=O)O)C(C)(C)S[C@H]12)c1cscc1	92169762	0	Roy et al. ACS Omega. 2019; 4(16):16774-16780. DOI: 10.1021/acsomega.9b01512
551	O=C(O)[C@@](NN)(Cc1cc(O)c(O)cc1)C	34359	0	Roy et al. ACS Omega. 2019; 4(16):16774-16780. DOI: 10.1021/acsomega.9b01512
552	O=C(O)/C(/CC/C=C(\C)/C)=C/1\[C@@H](OC(=O)C)C[C@]2(C)[C@]3(C)[C@H]([C@@H](O)C[C@H]\12)[C@@]1(C)[C@H]([C@H](C)[C@@H](O)CC1)CC3	NA	0	Roy et al. ACS Omega. 2019; 4(16):16774-16780. DOI: 10.1021/acsomega.9b01512
553	O=C(NNCc1c(O)c(O)c(O)cc1)[C@H](N)CO	40467070	0	Roy et al. ACS Omega. 2019; 4(16):16774-16780. DOI: 10.1021/acsomega.9b01512
554	O=C(NN[C@@H](C)c1ccccc1)c1ccccc1	10220393	1	Roy et al. ACS Omega. 2019; 4(16):16774-16780. DOI: 10.1021/acsomega.9b01512
555	O=C(NCN1CCN(CCO)CC1)C=1C(=O)[C@]2(O)C(O)=C3C(=O)c4c(O)cccc4[C@@](O)(C)[C@@H]3C[C@@H]2[C@H](N(C)C)C=1O	NA	0	Roy et al. ACS Omega. 2019; 4(16):16774-16780. DOI: 10.1021/acsomega.9b01512
556	O=C(NCN1CCN(C(=N)N[C-]([N+H3])N)CC1)C=1C(=O)[C@]2(O)C(O)=C3C(=O)c4c(O)cccc4[C@](O)(C)[C@H]3C[C@H]2[C@H](N(C)C)C=1O	NA	0	Roy et al. ACS Omega. 2019; 4(16):16774-16780. DOI: 10.1021/acsomega.9b01512
557	O=C(NCN1CCCC1)C=1C(=O)[C@]2(O)C(O)=C3C(=O)c4c(O)cccc4[C@@](O)(C)[C@@H]3C[C@@H]2[C@@H](N(C)C)C=1O	133562776	0	Roy et al. ACS Omega. 2019; 4(16):16774-16780. DOI: 10.1021/acsomega.9b01512
558	O=C(NCN(CCN(CNC(=O)C=1C(=O)[C@]2(O)C(O)=C3C(=O)c4c(O)cccc4[C@@](O)(C)[C@H]3C[C@H]2[C@H](N(C)C)C=1O)C)C)C=1C(=O)[C@]2(O)C(O)=C3C(=O)c4c(O)cccc4[C@@](O)(C)[C@@H]3C[C@@H]2[C@H](N(C)C)C=1O	NA	0	Roy et al. ACS Omega. 2019; 4(16):16774-16780. DOI: 10.1021/acsomega.9b01512
559	O=C(NCCOc1c(-c2ccccc2)nc2c(c1C(=O)N[C@@H](CC)c1ccccc1)cccc2)Cc1ncccc1	70250504	0	Roy et al. ACS Omega. 2019; 4(16):16774-16780. DOI: 10.1021/acsomega.9b01512
560	O=C(NCCOc1c(-c2ccccc2)nc2c(c1C(=O)N[C@@H](CC)c1ccccc1)cccc2)Cc1c(C(=O)O)cccc1	20679021	0	Roy et al. ACS Omega. 2019; 4(16):16774-16780. DOI: 10.1021/acsomega.9b01512
561	O=C(NCCOc1c(-c2ccccc2)nc2c(c1C(=O)N[C@@H](CC)c1ccccc1)cccc2)[C@H]1NCCC1	NA	0	Roy et al. ACS Omega. 2019; 4(16):16774-16780. DOI: 10.1021/acsomega.9b01512
562	O=C(NCCOC=2C(=C1C=CC=CC1=NC=2/C3=C/C=CC=C3)C(=O)N[C@@]([H])(CC)C4=CC=CC=C4)[C@@]5([H])CCCN5	NA	0	Shen et al. J Chem Inf Model. 2010;50(6):1034-1041. DOI: 10.1021/ci100104j
563	O=C(NCCN1CCN(CC1)c2ncccn2)C45CC3CC(CC(C3)C4)C5	130918	1	Zhao et al. J Chem Inf Model. 2007;47(1):170–175. DOI:10.1021/ci600312d
564	O=C(NCCCC[C@H]1C(=O)N[C@H](CCCN)C(=O)N[C@@H]([C@H](CC)C)C(=O)N[C@H](Cc2ccccc2)C(=O)N[C@@H](Cc2nc[nH]c2)C(=O)N[C@H](CC(=O)O)C(=O)N[C@@H](CC(=O)N)C(=O)N1)[C@@H](NC(=O)[C@H](NC(=O)[C@@H](NC(=O)[C@H]1N[C@@H]([C@H](N)[C@@H](CC)C)SC1)CC(C)C)CCC(=O)O)[C@H](CC)C	NA	0	Roy et al. ACS Omega. 2019; 4(16):16774-16780. DOI: 10.1021/acsomega.9b01512
565	O=C(NCCCC(=O)O)[C@H](O)C(CO)(C)C	28281	1	Roy et al. ACS Omega. 2019; 4(16):16774-16780. DOI: 10.1021/acsomega.9b01512
566	O=C(NCCC)N1C(=O)O[C@H](c2ccccc2)C1	76958322	1	Roy et al. ACS Omega. 2019; 4(16):16774-16780. DOI: 10.1021/acsomega.9b01512
567	O=C(NCCC)c1cc2N(CCN3CCCC3)c3c(Sc2cc1)cccc3	NA	1	Roy et al. ACS Omega. 2019; 4(16):16774-16780. DOI: 10.1021/acsomega.9b01512
568	O=C(NCCC)c1cc2N([C@H](CN3CCCC3)C)c3c(Sc2cc1)cccc3	14536538	1	Roy et al. ACS Omega. 2019; 4(16):16774-16780. DOI: 10.1021/acsomega.9b01512
569	O=C(Nc1scc(/C(=N\OC)/C(=O)N[C@H]2C(=O)N3C(C(=O)OCOC(=O)C(C)(C)C)=CCS[C@H]23)n1)[C@H](N)C	NA	0	Roy et al. ACS Omega. 2019; 4(16):16774-16780. DOI: 10.1021/acsomega.9b01512
570	O=C(NC1CCN(CC1)Cc3ccc2ccccc2c3)NC(=O)c4ccccc4	72002	1	Zhao et al. J Chem Inf Model. 2007;47(1):170–175. DOI:10.1021/ci600312d
571	O=C(Nc1ccccc1)OCC2(CCCC2)COC(=O)Nc3ccccc3	72076	1	Zhao et al. J Chem Inf Model. 2007;47(1):170–175. DOI:10.1021/ci600312d
572	O=C(Nc1ccccc1)NC=1ONN([C@@H](Cc2ccccc2)C)C=1	NA	1	Roy et al. ACS Omega. 2019; 4(16):16774-16780. DOI: 10.1021/acsomega.9b01512
573	O=C(NC1CCCCC1)[C@@H]1CN(C)[C@H]2[C@H](c3c4c(n(C(C)C)cc4C2)ccc3)C1	NA	1	Roy et al. ACS Omega. 2019; 4(16):16774-16780. DOI: 10.1021/acsomega.9b01512
574	O=C(Nc1ccc(OC(=O)[C@H]2NC(=O)CC2)cc1)C	65920	1	Roy et al. ACS Omega. 2019; 4(16):16774-16780. DOI: 10.1021/acsomega.9b01512
575	O=C(Nc1cc(-c2nc(N[C-]([N+H3])N)sc2)ccc1)C	NA	0	Roy et al. ACS Omega. 2019; 4(16):16774-16780. DOI: 10.1021/acsomega.9b01512
576	O=C(Nc1cc(C(=O)C)c(OC[C@@H](O)CNC(C)C)cc1)CCC	155083	0	Roy et al. ACS Omega. 2019; 4(16):16774-16780. DOI: 10.1021/acsomega.9b01512
577	O=C(NC1C[C@@H]2N(Cc3ccccc3)[C@H](C1)CC2)c1c(OC)c(OC)ccc1	71148	1	Roy et al. ACS Omega. 2019; 4(16):16774-16780. DOI: 10.1021/acsomega.9b01512
578	O=C(NC1C[C@@H]2N(C)[C@H](C1)CC2)N1c2c(C(C)(C)C1)cccc2	71785	1	Roy et al. ACS Omega. 2019; 4(16):16774-16780. DOI: 10.1021/acsomega.9b01512
579	O=C(NC1C[C@@H]2N(C)[C@H](C1)CC2)C=1C(=O)c2c(N(C3CCCCC3)C=1)cccc2	60931	1	Roy et al. ACS Omega. 2019; 4(16):16774-16780. DOI: 10.1021/acsomega.9b01512
580	O=C(Nc1c(O)ccc([C@H](O)CNC(C)(C)C)c1)N	76965099	0	Roy et al. ACS Omega. 2019; 4(16):16774-16780. DOI: 10.1021/acsomega.9b01512
581	O=C(NC[C@H](CCCC)CC)C[C@H](O)C	76970124	1	Roy et al. ACS Omega. 2019; 4(16):16774-16780. DOI: 10.1021/acsomega.9b01512
582	O=C(NC[C@@H]1N(CC)CCC1)c1c(OC)ccc(C(=O)C)c1	76960153	1	Roy et al. ACS Omega. 2019; 4(16):16774-16780. DOI: 10.1021/acsomega.9b01512
583	O=C(NC/C=C/C=C(/[C@@H](OC)[C@@H](C)[C@@H]1[C@@H](O)[C@H](O)[C@H](/C=C/C=C/C=C(/C(=O)C=2C(=O)N(C)C=CC=2O)\C)O1)\C)[C@H](CC)[C@@]1(O)[C@H](O)[C@@H](O[C@@H]2[C@@H](O)[C@H](OC)[C@@H](O[C@@H]3[C@@H](OC)[C@H](O)[C@@H](OC)[C@H](C)O3)[C@@H](C)O2)C(C)(C)[C@@H](/C=C/C=C/C)O1	NA	0	Roy et al. ACS Omega. 2019; 4(16):16774-16780. DOI: 10.1021/acsomega.9b01512
584	O=C(NC(=O)[C@H]([C@@H](CC)C)CC)N	25134183	1	Roy et al. ACS Omega. 2019; 4(16):16774-16780. DOI: 10.1021/acsomega.9b01512
585	O=C(NC(=O)[C@@H](CC)c1ccccc1)N	12309789	1	Roy et al. ACS Omega. 2019; 4(16):16774-16780. DOI: 10.1021/acsomega.9b01512
586	O=C(NC(=O)/C(=C/C)/CC)N	5354486	1	Roy et al. ACS Omega. 2019; 4(16):16774-16780. DOI: 10.1021/acsomega.9b01512
587	O=C(N1CCOCC1)c2cccnc2	68116	1	Zhao et al. J Chem Inf Model. 2007;47(1):170–175. DOI:10.1021/ci600312d
588	O=C(N1CCN(CC1)Cc2ccccc2)c4cc3ccccc3o4	68664	1	Zhao et al. J Chem Inf Model. 2007;47(1):170–175. DOI:10.1021/ci600312d
589	O=C(N1CCN(CC1)Cc2ccccc2)c3ccccn3	65975	1	Zhao et al. J Chem Inf Model. 2007;47(1):170–175. DOI:10.1021/ci600312d
590	O=C(N1CCCCC1)[C@H]1NC(=O)CC1	11252569	1	Roy et al. ACS Omega. 2019; 4(16):16774-16780. DOI: 10.1021/acsomega.9b01512
591	O=C(N1CC(=O)N2[C@@H](c3c(cccc3)CC2)C1)C1CCCCC1	1917817	1	Roy et al. ACS Omega. 2019; 4(16):16774-16780. DOI: 10.1021/acsomega.9b01512
592	O=C(N1C(=O)[C@](CC)(c2ccccc2)C(=O)NC1=O)c1ccccc1	871286	1	Roy et al. ACS Omega. 2019; 4(16):16774-16780. DOI: 10.1021/acsomega.9b01512
593	O=C(N[C@H]1C=2C(c3c(OC)c(OC)c(OC)cc3CC1)=CC=C(OC)C(=O)C=2)C	53278	0	Roy et al. ACS Omega. 2019; 4(16):16774-16780. DOI: 10.1021/acsomega.9b01512
594	O=C(N[C@H]1C(=O)N2C(C(=O)O)=C(OC)CS[C@H]12)[C@H](N)C1C=CCC=C1	NA	0	Roy et al. ACS Omega. 2019; 4(16):16774-16780. DOI: 10.1021/acsomega.9b01512
595	O=C(N[C@H]1C(=O)N2C(C(=O)O)=C(COC(=O)C)CS[C@H]12)Cc1sccc1	7048637	0	Roy et al. ACS Omega. 2019; 4(16):16774-16780. DOI: 10.1021/acsomega.9b01512
596	O=C(N[C@H]1C(=O)N2C(C(=O)O)=C(COC(=O)C)CS[C@H]12)Cc1ccccc1	40604834	0	Roy et al. ACS Omega. 2019; 4(16):16774-16780. DOI: 10.1021/acsomega.9b01512
597	O=C(N[C@H]1C(=O)N2C(C(=O)O)=C(COC(=O)C)CS[C@H]12)CC#N	13035350	0	Roy et al. ACS Omega. 2019; 4(16):16774-16780. DOI: 10.1021/acsomega.9b01512
598	O=C(N[C@H]1C(=O)N2C(C(=O)O)=C(COC(=O)C)CS[C@H]12)[C@@H](N)c1ccccc1	124335026	0	Roy et al. ACS Omega. 2019; 4(16):16774-16780. DOI: 10.1021/acsomega.9b01512
599	O=C(N[C@H]1C(=O)N2C(C(=O)O)=C(COC(=O)C)CS[C@H]12)/C(=N/OC)/c1occc1	NA	0	Roy et al. ACS Omega. 2019; 4(16):16774-16780. DOI: 10.1021/acsomega.9b01512
600	O=C(N[C@H]1C(=O)N2C(C(=O)O)=C(CN3N(CCO)C(N)=CC3)CS[C@@H]12)/C(=N/OC)/c1nc(N)sc1	NA	0	Roy et al. ACS Omega. 2019; 4(16):16774-16780. DOI: 10.1021/acsomega.9b01512
601	O=C(N[C@H]1C(=O)N2C(C(=O)O)=C(CN3C4=C(CC=C3)CCCC4)CS[C@H]12)/C(=N/OC)/c1nc(N)sc1	NA	0	Roy et al. ACS Omega. 2019; 4(16):16774-16780. DOI: 10.1021/acsomega.9b01512
602	O=C(N[C@H]1C(=O)N2C(C(=O)O)=C(CN3C=CC(C(=O)N)C=C3)CS[C@H]12)Cc1sccc1	NA	0	Roy et al. ACS Omega. 2019; 4(16):16774-16780. DOI: 10.1021/acsomega.9b01512
603	O=C(N[C@H]1C(=O)N2C(C(=O)O)=C(C=C)CS[C@H]12)/C(=N/OCC(=O)O)/c1nc(N)sc1	71314611	0	Roy et al. ACS Omega. 2019; 4(16):16774-16780. DOI: 10.1021/acsomega.9b01512
604	O=C(N[C@H]1C(=O)N2C(C(=O)O)=C(C)CS[C@H]12)Cc1ccc(C2=NCCCN2)cc1	NA	0	Roy et al. ACS Omega. 2019; 4(16):16774-16780. DOI: 10.1021/acsomega.9b01512
605	O=C(N[C@H]1C(=O)N2C(C(=O)O)=C(C)CS[C@H]12)[C@@H](N)c1ccc(O)cc1	92402341	0	Roy et al. ACS Omega. 2019; 4(16):16774-16780. DOI: 10.1021/acsomega.9b01512
606	O=C(N[C@H]1C(=O)N2C(C(=O)O)=C(/C=C/c3c(C)ncs3)CS[C@@H]12)/C(=N/OC)/c1nc(N)sc1	NA	0	Roy et al. ACS Omega. 2019; 4(16):16774-16780. DOI: 10.1021/acsomega.9b01512
607	O=C(N[C@H]1C(=O)N2[C@H](C(=O)O[C@@H]3OC(=O)c4c3cccc4)C(C)(C)S[C@H]12)[C@H](N)c1ccccc1	NA	0	Roy et al. ACS Omega. 2019; 4(16):16774-16780. DOI: 10.1021/acsomega.9b01512
608	O=C(N[C@H]1C(=O)N2[C@H](C(=O)O)C(C)(C)S[C@H]12)[C@H](N=C)c1ccccc1	40469435	0	Roy et al. ACS Omega. 2019; 4(16):16774-16780. DOI: 10.1021/acsomega.9b01512
609	O=C(N[C@H]1C(=O)N2[C@H](C(=O)O)C(C)(C)S[C@H]12)[C@@H](/N=C/c1occc1)c1ccc(O)cc1	NA	0	Roy et al. ACS Omega. 2019; 4(16):16774-16780. DOI: 10.1021/acsomega.9b01512
610	O=C(N[C@H]1C(=O)N2[C@@H](C(=O)OCOC(=O)C(C)(C)C)C(C)(C)S[C@@H]12)[C@H](N)c1ccccc1	124338917	0	Roy et al. ACS Omega. 2019; 4(16):16774-16780. DOI: 10.1021/acsomega.9b01512
611	O=C(N[C@H]1C(=O)N2[C@@H](C(=O)OCOC(=O)[C@H]3C(C)(C)S(=O)(=O)[C@@H]4N3C(=O)C4)C(C)(C)S[C@@H]12)[C@H](N)c1ccccc1	98047118	0	Roy et al. ACS Omega. 2019; 4(16):16774-16780. DOI: 10.1021/acsomega.9b01512
612	O=C(N[C@H]1C(=O)N2[C@@H](C(=O)O)C(C)(C)S[C@H]12)COc1ccccc1	12373888	0	Roy et al. ACS Omega. 2019; 4(16):16774-16780. DOI: 10.1021/acsomega.9b01512
613	O=C(N[C@H]1C(=O)N2[C@@H](C(=O)O)C(C)(C)S[C@H]12)Cc1ccccc1	12309625	0	Roy et al. ACS Omega. 2019; 4(16):16774-16780. DOI: 10.1021/acsomega.9b01512
614	O=C(N[C@H]1C(=O)N2[C@@H](C(=O)O)C(C)(C)S[C@H]12)[C@H](N)c1ccccc1	12306100	0	Roy et al. ACS Omega. 2019; 4(16):16774-16780. DOI: 10.1021/acsomega.9b01512
615	O=C(N[C@H]1C(=O)N2[C@@H](C(=O)O)C(C)(C)S[C@H]12)[C@H](N)c1ccc(O)cc1	1796235	0	Roy et al. ACS Omega. 2019; 4(16):16774-16780. DOI: 10.1021/acsomega.9b01512
616	O=C(N[C@H]1C(=O)N2[C@@H](C(=O)O)C(C)(C)S[C@@H]12)[C@H](Oc1ccccc1)CC	95555423	0	Roy et al. ACS Omega. 2019; 4(16):16774-16780. DOI: 10.1021/acsomega.9b01512
617	O=C(N[C@H]1C(=O)N2[C@@H](C(=O)O)C(C)(C)S[C@@H]12)[C@H](NCNC(=O)C=1C(=O)[C@@]2(O)C(O)=C3C(=O)c4c(O)cccc4[C@](O)(C)[C@@H]3C[C@@H]2[C@H](N(C)C)C=1O)c1ccccc1	NA	0	Roy et al. ACS Omega. 2019; 4(16):16774-16780. DOI: 10.1021/acsomega.9b01512
618	O=C(N[C@H]1C(=O)N2[C@@H](C(=O)O)C(C)(C)S[C@@H]12)[C@@H](NC(=O)N1C(=O)C(=O)N(CC)CC1)c1ccccc1	92354763	0	Roy et al. ACS Omega. 2019; 4(16):16774-16780. DOI: 10.1021/acsomega.9b01512
619	O=C(N[C@H]1[C@H](O[C@@H]2[C@@H](O)[C@H](NC)[C@](O)(C)CO2)[C@@H](O)[C@@H](O[C@@H]2[C@H](O)[C@@H](O)[C@H](O)[C@H](CN)O2)[C@H](N)C1)[C@@H](O)CN	NA	0	Roy et al. ACS Omega. 2019; 4(16):16774-16780. DOI: 10.1021/acsomega.9b01512
620	O=C(N[C@H]1[C@H](O[C@@H]2[C@@H](O)[C@@H](N)[C@H](O)[C@H](CO)O2)[C@@H](O)[C@H](O[C@H]2[C@H](O)[C@H](O)[C@@H](O)[C@@H](CN)O2)[C@@H](N)C1)[C@@H](O)CCN	NA	0	Roy et al. ACS Omega. 2019; 4(16):16774-16780. DOI: 10.1021/acsomega.9b01512
621	O=C(N[C@H]1[C@H](c2ccccc2)C1)[C@H]1NC(=O)CC1	76967371	1	Roy et al. ACS Omega. 2019; 4(16):16774-16780. DOI: 10.1021/acsomega.9b01512
622	O=C(N[C@H]1[C@H](C)OC(=O)[C@@H](c2ccccc2)NC(=O)[C@@H]2N(C(=O)[C@H](Cc3ccccc3)N(C)C(=O)[C@@H]3N(C(=O)[C@H](CC)NC1=O)CCC3)CCC(=O)C2)c1c(O)cccn1	NA	0	Roy et al. ACS Omega. 2019; 4(16):16774-16780. DOI: 10.1021/acsomega.9b01512
623	O=C(N[C@H]1[C@@H](O)[C@H](C)O[C@H](O[C@@H]2c3c(O)c4C(=O)c5c(OC)cccc5C(=O)c4c(O)c3C[C@](O)(C(=O)CO)C2)C1)[C@@H](N)CC(C)C	5746195	0	Roy et al. ACS Omega. 2019; 4(16):16774-16780. DOI: 10.1021/acsomega.9b01512
624	O=C(N[C@H]1[C@@H](C)N(OCC(=O)OCC(=O)OC(C)(C)C)C1=O)/C(=N\OC)/c1nc(N)sc1	NA	0	Roy et al. ACS Omega. 2019; 4(16):16774-16780. DOI: 10.1021/acsomega.9b01512
625	O=C(N[C@H]/1[C@@]2(C)C(=O)[C@H](C)[C@H](OC2=O)C[C@H](OC(=O)C)/C=C\C(\C)=C/C[C@H](O)/C=C/C(/C)=C\1)C(=O)C	NA	0	Roy et al. ACS Omega. 2019; 4(16):16774-16780. DOI: 10.1021/acsomega.9b01512
626	O=C(N[C@H](CC(N(C)C)(C)C)C)[C@@H]1OS(=O)(=O)c2c(cc(OC)c(OC)c2)C1	76958914	1	Roy et al. ACS Omega. 2019; 4(16):16774-16780. DOI: 10.1021/acsomega.9b01512
627	O=C(N[C@H](C(=O)N1[C@@H](C(=O)N[C@@H](C(=O)N[C@@H](C=O)CCCN)CC)CCC1)Cc1ccccc1)[C@H](NC(=O)[C@@H](NC(=O)[C@@H](NC(=O)[C@H]1N(C(=O)[C@H](NC(=O)[C@@H](N)CC(C)C)Cc2ccccc2)CCC1)CC)CCCN)CC(C)C	NA	0	Roy et al. ACS Omega. 2019; 4(16):16774-16780. DOI: 10.1021/acsomega.9b01512
628	O=C(N[C@H](C(=O)N[C@H]1C(=O)N2[C@@H](C(=O)O)C(C)(C)S[C@@H]12)c1ccc(O)cc1)[C@@H](N)CC(=O)NC	NA	0	Roy et al. ACS Omega. 2019; 4(16):16774-16780. DOI: 10.1021/acsomega.9b01512
629	O=C(N[C@](Cc1ccccc1)(C)c1ccccc1)CN	760423	1	Roy et al. ACS Omega. 2019; 4(16):16774-16780. DOI: 10.1021/acsomega.9b01512
630	O=C(N[C@@H]1C(=O)N2C(C(=O)OCC(=O)OC(C)(C)C)=C(C)CS[C@H]12)[C@@H](N)c1ccccc1	NA	0	Roy et al. ACS Omega. 2019; 4(16):16774-16780. DOI: 10.1021/acsomega.9b01512
631	O=C(N[C@@H]1C(=O)N2C(C(=O)O)=CCS[C@H]12)/C(=N/OC)/C=1NC(=N)SC=1	6533629	0	Roy et al. ACS Omega. 2019; 4(16):16774-16780. DOI: 10.1021/acsomega.9b01512
632	O=C(N[C@@H]1C(=O)N2C(C(=O)O)=CCS[C@@H]12)/C(=C/CC(=O)O)/c1nc(N)sc1	NA	0	Roy et al. ACS Omega. 2019; 4(16):16774-16780. DOI: 10.1021/acsomega.9b01512
633	O=C(N[C@@H]1C(=O)N2C(C(=O)O)=C(COC)CS[C@H]12)/C(=N/OC)/c1nc(N)sc1	6335986	0	Roy et al. ACS Omega. 2019; 4(16):16774-16780. DOI: 10.1021/acsomega.9b01512
634	O=C(N[C@@H]1C(=O)N2C(C(=O)O)=C(COC)CS[C@@H]12)/C(=N/O)/c1nc(N)sc1	NA	0	Roy et al. ACS Omega. 2019; 4(16):16774-16780. DOI: 10.1021/acsomega.9b01512
635	O=C(N[C@@H]1C(=O)N2C(C(=O)O)=C(COC(=O)C)CS[C@@H]12)/C(=N/OC)/c1nc(N)sc1	6604086	0	Roy et al. ACS Omega. 2019; 4(16):16774-16780. DOI: 10.1021/acsomega.9b01512
636	O=C(N[C@@H]1C(=O)N2C(C(=O)O)=C(CN3NC(C)=NN3)CS[C@@H]12)/C(=N/OC)/c1nc(N)sc1	NA	0	Roy et al. ACS Omega. 2019; 4(16):16774-16780. DOI: 10.1021/acsomega.9b01512
637	O=C(N[C@@H]1C(=O)N2C(C(=O)O)=C(CN3C4=C(CC=C3)CCC4)CS[C@H]12)/C(=N/OC)/c1nc(N)sc1	NA	0	Roy et al. ACS Omega. 2019; 4(16):16774-16780. DOI: 10.1021/acsomega.9b01512
638	O=C(N[C@@H]1C(=O)N2C(C(=O)O)=C(CN3C=CCC=C3)CS[C@@H]12)Cc1sccc1	NA	0	Roy et al. ACS Omega. 2019; 4(16):16774-16780. DOI: 10.1021/acsomega.9b01512
639	O=C(N[C@@H]1C(=O)N2C(C(=O)O)=C(CN3C=CCC=C3)CS[C@@H]12)/C(=N/O[C@@H]1C(=O)NCC1)/c1sc(N)nc1	NA	0	Roy et al. ACS Omega. 2019; 4(16):16774-16780. DOI: 10.1021/acsomega.9b01512
640	O=C(N[C@@H]1C(=O)N2C(C(=O)O)=C(CN3[C@H]4N(N=CC=C4)C=C3)CS[C@H]12)/C(=N/OC)/c1nc(N)sn1	NA	0	Roy et al. ACS Omega. 2019; 4(16):16774-16780. DOI: 10.1021/acsomega.9b01512
641	O=C(N[C@@H]1C(=O)N2C(C(=O)O)=C(C=C)CS[C@@H]12)/C(=N/O)/c1nc(N)sc1	87506936	0	Roy et al. ACS Omega. 2019; 4(16):16774-16780. DOI: 10.1021/acsomega.9b01512
642	O=C(N[C@@H]1C(=O)N2C(C(=O)O)=C(C[N+]34CCC(C(=O)N)(CC3)C[C-H]4)CS[C@H]12)/C(=N/OC)/c1nc(N)sn1	NA	0	Roy et al. ACS Omega. 2019; 4(16):16774-16780. DOI: 10.1021/acsomega.9b01512
643	O=C(N[C@@H]1C(=O)N2C(C(=O)O)=C(C[N+]3([C-H2])CCCC3)CS[C@@H]12)/C(=N/OC)/c1nc(N)sc1	NA	0	Roy et al. ACS Omega. 2019; 4(16):16774-16780. DOI: 10.1021/acsomega.9b01512
644	O=C(N[C@@H]1C(=O)N2C(C(=O)O)=C(C)CS[C@@H]12)[C@H](N)C1=CCC=CC1	12876371	0	Roy et al. ACS Omega. 2019; 4(16):16774-16780. DOI: 10.1021/acsomega.9b01512
645	O=C(N[C@@H]1C(=O)N2C(C(=O)O)=C(C)CS[C@@H]12)/C(=N/OC)/c1nc(N)sc1	45358088	0	Roy et al. ACS Omega. 2019; 4(16):16774-16780. DOI: 10.1021/acsomega.9b01512
646	O=C(N[C@@H]1C(=O)N2[C@H](C(=O)OCOC(=O)C)C(C)(C)S[C@@H]12)Cc1ccccc1	NA	0	Roy et al. ACS Omega. 2019; 4(16):16774-16780. DOI: 10.1021/acsomega.9b01512
647	O=C(N[C@@H]1C(=O)N2[C@H](C(=O)OCC3=C(C)OC(=O)O3)C(C)(C)S[C@@H]12)[C@@H](N)c1ccccc1	NA	0	Roy et al. ACS Omega. 2019; 4(16):16774-16780. DOI: 10.1021/acsomega.9b01512
648	O=C(N[C@@H]1C(=O)N2[C@H](C(=O)O)C(C)(C)S[C@H]12)[C@H](NC(=O)CNC(=N)c1ccncc1)c1ccccc1	NA	0	Roy et al. ACS Omega. 2019; 4(16):16774-16780. DOI: 10.1021/acsomega.9b01512
649	O=C(N[C@@H]1C(=O)N2[C@H](C(=O)O)C(C)(C)S[C@H]12)[C@@H](NC(=O)c1c(O)c2ncccc2nc1)c1ccccc1	NA	0	Roy et al. ACS Omega. 2019; 4(16):16774-16780. DOI: 10.1021/acsomega.9b01512
650	O=C(N[C@@H]1C(=O)N2[C@H](C(=O)O)C(C)(C)S[C@@H]12)[C@H](Oc1ccccc1)C	42066797	0	Roy et al. ACS Omega. 2019; 4(16):16774-16780. DOI: 10.1021/acsomega.9b01512
651	O=C(N[C@@H]1C(=O)N2[C@H](C(=O)O)C(C)(C)S[C@@H]12)[C@@H](NC(=O)Cc1ccc(C2=NCCCN2)cc1)c1ccccc1	NA	0	Roy et al. ACS Omega. 2019; 4(16):16774-16780. DOI: 10.1021/acsomega.9b01512
652	O=C(N[C@@H]1C(=O)N2[C@H](C(=O)O)C(C)(C)S[C@@H]12)[C@@H](N)C1=CCC=CC1	NA	0	Roy et al. ACS Omega. 2019; 4(16):16774-16780. DOI: 10.1021/acsomega.9b01512
653	O=C(N[C@@H]1C(=O)N2[C@H](C(=O)O)C(C)(C)S[C@@H]12)[C@@H]([N-][N+H]=N)c1ccccc1	NA	0	Roy et al. ACS Omega. 2019; 4(16):16774-16780. DOI: 10.1021/acsomega.9b01512
654	O=C(N[C@@H]1C(=O)N2[C@@H](C(=O)O)C(C)(C)S[C@H]12)C(Oc1ccccc1)(C)C	3038477	0	Roy et al. ACS Omega. 2019; 4(16):16774-16780. DOI: 10.1021/acsomega.9b01512
655	O=C(N[C@@H]1C(=O)[C@@H]2[C@@H](C(=O)O)C(C)(C)S[C@H]12)[C@@H](Oc1ccccc1)c1ccccc1	NA	0	Roy et al. ACS Omega. 2019; 4(16):16774-16780. DOI: 10.1021/acsomega.9b01512
656	O=C(N[C@@H]1[C@H](O[C@H]2[C@@H](O)[C@H](N)[C@@H](O)[C@H](CO)O2)[C@@H](O)[C@@H](O[C@@H]2[C@@H](N)CC[C@H](CN)O2)[C@H](N)C1)[C@H](O)CCN	NA	0	Roy et al. ACS Omega. 2019; 4(16):16774-16780. DOI: 10.1021/acsomega.9b01512
657	O=C(N[C@@H]1[C@H](C)N(OCC(=O)O)C1=O)/C(=N\OC)/c1nc(N)sc1	NA	0	Roy et al. ACS Omega. 2019; 4(16):16774-16780. DOI: 10.1021/acsomega.9b01512
658	O=C(N[C@@H]1[C@@H](O)Cc2c1cccc2)[C@@H](C[C@H](O)CN1[C@@H](C(=O)NC(C)(C)C)CN(Cc2cnccc2)CC1)Cc1ccccc1	131632872	0	Roy et al. ACS Omega. 2019; 4(16):16774-16780. DOI: 10.1021/acsomega.9b01512
659	O=C(N[C@@H]1[C@@H](C)OC(=O)[C@H](c2ccccc2)NC(=O)[C@H]2N(C(=O)[C@@H](Cc3ccc(N(C)C)cc3)N(C)C(=O)[C@H]3N(C(=O)[C@@H](CC)NC1=O)CCC3)CCC(=O)C2)c1c(O)cccn1	NA	0	Roy et al. ACS Omega. 2019; 4(16):16774-16780. DOI: 10.1021/acsomega.9b01512
660	O=C(N[C@@H]1[C@@H](C)OC(=O)[C@H](c2ccccc2)NC(=O)[C@H]2N(C(=O)[C@@H](Cc3ccc(N(C)C)cc3)N(C)C(=O)[C@H]3N(C(=O)[C@@H](C)NC1=O)CCC3)CCC(=O)C2)c1c(O)cccn1	NA	0	Roy et al. ACS Omega. 2019; 4(16):16774-16780. DOI: 10.1021/acsomega.9b01512
661	O=C(N[C@@H](CC)c1ccccc1)c1c(OCCCN(C)C)c(-c2ccccc2)nc2c1cccc2	10695575	1	Roy et al. ACS Omega. 2019; 4(16):16774-16780. DOI: 10.1021/acsomega.9b01512
662	O=C(N[C@@H](CC)c1ccccc1)c1c(O)c(-c2ccccc2)nc2c1cccc2	5311424	1	Roy et al. ACS Omega. 2019; 4(16):16774-16780. DOI: 10.1021/acsomega.9b01512
663	O=C(N[C@@H](CC)c1ccccc1)c1c(Cn2cncc2)c(-c2ccccc2)nc2c1cccc2	NA	0	Roy et al. ACS Omega. 2019; 4(16):16774-16780. DOI: 10.1021/acsomega.9b01512
664	O=C(N[C@@H](CC)c1ccccc1)c1c(C)c(-c2ccccc2)nc2c1cccc2	6604009	1	Roy et al. ACS Omega. 2019; 4(16):16774-16780. DOI: 10.1021/acsomega.9b01512
665	O=C(N[C@@H](C(=O)N1[C@H](C(=O)N[C@@H](C=O)Cc2ccccc2)CCC1)CCCN)[C@H](NC(=O)[C@H](NC(=O)[C@H](N)CC(C)C)CCCN)C(C)C	NA	0	Roy et al. ACS Omega. 2019; 4(16):16774-16780. DOI: 10.1021/acsomega.9b01512
666	O=C(N[C@@H](C(=O)N[C@H](C(=O)N[C@@H](C(=O)N[C@H](C(=O)N[C@@H](C(=O)N[C@H](C(=O)N[C@@H](C(=O)N[C@H](C(=O)NCCO)Cc1c2c([nH]c1)cccc2)CC(C)C)Cc1c2c([nH]c1)cccc2)CC(C)C)Cc1c2c([nH]c1)cccc2)CC(C)C)Cc1c2c([nH]c1)cccc2)C(C)C)[C@@H](NC(=O)[C@H](NC(=O)[C@@H](NC(=O)[C@H](NC(=O)[C@H](NC(=O)CNC(=O)[C@@H](NC=O)C(C)C)C)CC(C)C)C)C(C)C)C(C)C	NA	0	Roy et al. ACS Omega. 2019; 4(16):16774-16780. DOI: 10.1021/acsomega.9b01512
667	O=C(N[C@@H](C(=O)N[C@H](C(=O)N[C@@H](C(=O)N[C@H](C(=O)N[C@@H](C(=O)N[C@@H](C(=O)N[C@H](C(=O)N[C@H](C(=O)NCCO)Cc1c2c([nH]c1)cccc2)CC(C)C)Cc1c2c([nH]c1)cccc2)CC(C)C)Cc1ccccc1)CC(C)C)Cc1c2c([nH]c1)cccc2)C(C)C)[C@H](NC(=O)[C@H](NC(=O)[C@H](NC(=O)[C@H](NC(=O)[C@@H](NC(=O)CNC(=O)[C@H](NC=O)C(C)C)C)CC(C)C)C)C(C)C)C(C)C	NA	0	Roy et al. ACS Omega. 2019; 4(16):16774-16780. DOI: 10.1021/acsomega.9b01512
668	O=C(N[C@@H]([C@@H](O)CN1[C@@H](C(=O)NC(C)(C)C)C[C@H]2[C@H](C1)CCCC2)Cc1ccccc1)[C@@H](NC(=O)c1nc2c(cc1)cccc2)CC(=O)N	NA	0	Roy et al. ACS Omega. 2019; 4(16):16774-16780. DOI: 10.1021/acsomega.9b01512
669	O=C(N[C@@]1(C)C(=O)N2[C@@H](Cc3ccccc3)C(=O)N3[C@H]([C@]2(O)O1)CCC3)[C@H]1CN(C)[C@H]2[C@@H](c3c4c([nH]cc4C2)ccc3)C1	10531	0	Roy et al. ACS Omega. 2019; 4(16):16774-16780. DOI: 10.1021/acsomega.9b01512
670	O=C(N/N=C(\C)/[C@@]1(O)C[C@@H](O[C@@H]2O[C@H](C)[C@H](O)[C@@H](N)C2)c2c(O)c3C(=O)c4c(OC)cccc4C(=O)c3c(O)c2C1)c1ccccc1	NA	0	Roy et al. ACS Omega. 2019; 4(16):16774-16780. DOI: 10.1021/acsomega.9b01512
671	O=C(N)N1c2c([C@H]3O[C@@H]3c3c1cccc3)cccc2	29975387	1	Roy et al. ACS Omega. 2019; 4(16):16774-16780. DOI: 10.1021/acsomega.9b01512
672	O=C(N)CN1C(=O)C[C@H](O)C1	6603951	1	Roy et al. ACS Omega. 2019; 4(16):16774-16780. DOI: 10.1021/acsomega.9b01512
673	O=C(N)CN1C(=O)[C@H](c2ccccc2)c2c1cccc2	76957915	1	Roy et al. ACS Omega. 2019; 4(16):16774-16780. DOI: 10.1021/acsomega.9b01512
674	O=C(N)Cc1ccc(OC[C@H](O)CNC(C)C)cc1	180559	0	Roy et al. ACS Omega. 2019; 4(16):16774-16780. DOI: 10.1021/acsomega.9b01512
675	O=C(N)c1nn([C@@H]2[C@H](O)[C@H](O)[C@@H](CO)O2)nc1	NA	1	Roy et al. ACS Omega. 2019; 4(16):16774-16780. DOI: 10.1021/acsomega.9b01512
676	O=C(N)C=1C(=O)[C@]2(O)C(O)=C3C(=O)c4c(O)cccc4C(=C)[C@H]3[C@@H](O)[C@H]2[C@@H](N(C)C)C=1O	NA	0	Roy et al. ACS Omega. 2019; 4(16):16774-16780. DOI: 10.1021/acsomega.9b01512
677	O=C(N)C=1C(=O)[C@]2(O)C(O)=C3C(=O)c4c(O)cccc4[C@H](C)[C@@H]3[C@H](O)[C@@H]2[C@H](N(C)C)C=1O	54734921	0	Roy et al. ACS Omega. 2019; 4(16):16774-16780. DOI: 10.1021/acsomega.9b01512
678	O=C(N)C=1C(=O)[C@]2(O)C(O)=C3C(=O)c4c(O)cccc4[C@@](O)(C)[C@@H]3C[C@@H]2[C@@H](N(C)C)C=1O	122172551	0	Roy et al. ACS Omega. 2019; 4(16):16774-16780. DOI: 10.1021/acsomega.9b01512
679	O=C(N)C=1C(=O)[C@]2(O)C(O)=C3C(=O)c4c(O)cccc4[C@@](O)(C)[C@@H]3[C@H](O)[C@@H]2[C@H](N(C)C)C=1O	98386030	0	Roy et al. ACS Omega. 2019; 4(16):16774-16780. DOI: 10.1021/acsomega.9b01512
680	O=C(N)C=1C(=O)[C@]2(O)C(O)=C3C(=O)c4c(O)ccc(N(C)C)c4C[C@H]3C[C@H]2[C@@H](N(C)C)C=1O	54686782	0	Roy et al. ACS Omega. 2019; 4(16):16774-16780. DOI: 10.1021/acsomega.9b01512
681	O=C(N)C=1C(=O)[C@]2(O)C(O)=C3C(=O)c4c(O)c(N)ccc4C[C@H]3C[C@H]2[C@H](N(C)C)C=1O	73952156	0	Roy et al. ACS Omega. 2019; 4(16):16774-16780. DOI: 10.1021/acsomega.9b01512
682	O=C(N)C=1C(=O)[C@@]2(O)C(O)=C3C(=O)c4c(O)cccc4[C@H](O)[C@@H]3C[C@@H]2[C@@H](N(C)C)C=1O	NA	0	Roy et al. ACS Omega. 2019; 4(16):16774-16780. DOI: 10.1021/acsomega.9b01512
683	O=C(N)[C@H]([C@H](CC)C)CC	12015994	1	Roy et al. ACS Omega. 2019; 4(16):16774-16780. DOI: 10.1021/acsomega.9b01512
684	O=C(N)[C@]1(CC)[C@H](CCC)O1	76964936	1	Roy et al. ACS Omega. 2019; 4(16):16774-16780. DOI: 10.1021/acsomega.9b01512
685	O=C(N)[C@@H](CC)N1C(=O)CCC1	441341	1	Roy et al. ACS Omega. 2019; 4(16):16774-16780. DOI: 10.1021/acsomega.9b01512
686	O=C(N(CC)CC)Nc1cc(C(=O)C)c(OC[C@@H](O)CNC(C)(C)C)cc1	11406333	0	Roy et al. ACS Omega. 2019; 4(16):16774-16780. DOI: 10.1021/acsomega.9b01512
687	O=C(N(CC)CC)N[C@H]1CN(C)[C@H]2[C@H](c3c4c([nH]cc4C2)ccc3)C1	12917885	1	Roy et al. ACS Omega. 2019; 4(16):16774-16780. DOI: 10.1021/acsomega.9b01512
688	O=C(N(CC)CC)N[C@H]1C=C2[C@H](N(C)C1)Cc1c3c([nH]c1)cccc23	28864	1	Roy et al. ACS Omega. 2019; 4(16):16774-16780. DOI: 10.1021/acsomega.9b01512
689	O=C(N(CC)CC)COc1c2c3c(O)c(C)c4O[C@](C)(C(=O)c24)O/C=C/[C@@H](OC)[C@H](C)[C@@H](OC(=O)C)[C@H](C)[C@@H](O)[C@H](C)[C@H](O)[C@@H](C)/C=C\C=C(\C)/C(=O)Nc(c3O)c1	NA	0	Roy et al. ACS Omega. 2019; 4(16):16774-16780. DOI: 10.1021/acsomega.9b01512
690	O=C(N(CC)CC)[C@H]1[C@@H](C(=O)N(CC)CC)[C@H]2C=C[C@@H]1C2	92261608	1	Roy et al. ACS Omega. 2019; 4(16):16774-16780. DOI: 10.1021/acsomega.9b01512
691	O=C(N(CC)CC)[C@]1([C@@H](CN)C1)c1ccccc1	65833	1	Roy et al. ACS Omega. 2019; 4(16):16774-16780. DOI: 10.1021/acsomega.9b01512
692	O=C(N(CC)c1cc(C=2N3NCC(C#N)=C3N=CC=2)ccc1)C	142218237	1	Roy et al. ACS Omega. 2019; 4(16):16774-16780. DOI: 10.1021/acsomega.9b01512
693	O=C(N(C1CCN(CC1)CCc2ccccc2)c3cnccn3)c4ccco4	60698	1	Zhao et al. J Chem Inf Model. 2007;47(1):170–175. DOI:10.1021/ci600312d
694	O=C(N(c1ccccc1)[C@@]1(C(=O)OC)[C@@H](C)CN(CCc2ccccc2)CC1)CC	65499	1	Roy et al. ACS Omega. 2019; 4(16):16774-16780. DOI: 10.1021/acsomega.9b01512
695	O=C(N(C)C)CC1=C(c2ccc(C)cc2)N[C@H]2N1C=C(C)C=C2	NA	1	Roy et al. ACS Omega. 2019; 4(16):16774-16780. DOI: 10.1021/acsomega.9b01512
696	O=C(N(C)C)[C@H](N(C(=O)/C=C/C)CCC)CC	76969123	1	Roy et al. ACS Omega. 2019; 4(16):16774-16780. DOI: 10.1021/acsomega.9b01512
697	O=C(N(C)C)[C@@H](N(C(=O)/C=C/C)CC)CC	76956972	1	Roy et al. ACS Omega. 2019; 4(16):16774-16780. DOI: 10.1021/acsomega.9b01512
698	O=C(N(C)[C@H]1[C@H](OC)[C@@H](O)[C@H](N)[C@@H](O[C@@H]2[C@@H](N)CC[C@@H]([C@@H](N)C)O2)[C@@H]1O)CN	NA	0	Roy et al. ACS Omega. 2019; 4(16):16774-16780. DOI: 10.1021/acsomega.9b01512
699	O=C(N(C(=O)[C@H]1CN(CC=C)[C@@H]2[C@@H](c3c4c([nH]cc4C2)ccc3)C1)CCCN(C)C)NCC	126968469	1	Roy et al. ACS Omega. 2019; 4(16):16774-16780. DOI: 10.1021/acsomega.9b01512
700	O=C(N([C@@H](CN1C[C@H](O)CC1)c1ccccc1)C)C(c1ccccc1)c1ccccc1	15818935	1	Roy et al. ACS Omega. 2019; 4(16):16774-16780. DOI: 10.1021/acsomega.9b01512
701	O=C(N([C@@H](CN1C[C@@H](O)CC1)c1ccccc1)C)Cc1c(N)cccc1	9865169	0	Roy et al. ACS Omega. 2019; 4(16):16774-16780. DOI: 10.1021/acsomega.9b01512
702	O=C(CO)[C@]1(O)C[C@H](O[C@H]2O[C@H](C)[C@H](O[C@H]3OCCCC3)[C@@H](N)C2)c2c(O)c3C(=O)c4c(OC)cccc4C(=O)c3c(O)c2C1	NA	0	Roy et al. ACS Omega. 2019; 4(16):16774-16780. DOI: 10.1021/acsomega.9b01512
703	O=C(CO)[C@]1(O)C[C@H](O[C@H]2O[C@@H](C)C[C@@H](N)C2)c2c(O)c3C(=O)c4c(OC)cccc4C(=O)c3c(O)c2C1	6101842	0	Roy et al. ACS Omega. 2019; 4(16):16774-16780. DOI: 10.1021/acsomega.9b01512
704	O=C(CO)[C@]1(O)C(=C)C[C@H]2[C@@]1(C)C[C@H](O)[C@@H]1[C@@]3(C)C(=CC(=O)CC3)C=C[C@H]21	NA	1	Roy et al. ACS Omega. 2019; 4(16):16774-16780. DOI: 10.1021/acsomega.9b01512
705	O=C(CO)[C@]1(O)C(=C)C[C@@H]2[C@@]1(C)C[C@H](O)[C@@H]1[C@]3(C)C(=CC(=O)C=C3)CC[C@@H]21	NA	1	Roy et al. ACS Omega. 2019; 4(16):16774-16780. DOI: 10.1021/acsomega.9b01512
706	O=C(CO)[C@]1(O)[C@]2(C)[C@H]([C@@H]3[C@@H]([C@@H](O)C2)[C@@]2(C)[C@@H](C(=O)C=C2)C(=O)CC3)CC1	NA	1	Roy et al. ACS Omega. 2019; 4(16):16774-16780. DOI: 10.1021/acsomega.9b01512
707	O=C(CO)[C@]1(O)[C@]2(C)[C@@H]([C@@H]3[C@@H]([C@H](O)C2)[C@@]2(C)C([C@H](C)C3)=CC(=O)C=C2)CC1	NA	1	Roy et al. ACS Omega. 2019; 4(16):16774-16780. DOI: 10.1021/acsomega.9b01512
708	O=C(CO)[C@@H]1[C@]23[C@@H](O)O[C@H]([C@H]4[C@@]5(C)C(=CC(=O)CC5)CC[C@@H]4[C@H]2CC1)C3	NA	0	Roy et al. ACS Omega. 2019; 4(16):16774-16780. DOI: 10.1021/acsomega.9b01512
709	O=C(CO)[C@@H]1[C@]2(C)[C@H]([C@H]3[C@H]([C@H](O)C2)[C@]2(C)C(=CC(=O)CC2)CC3)CC1	256277	0	Roy et al. ACS Omega. 2019; 4(16):16774-16780. DOI: 10.1021/acsomega.9b01512
710	O=C(CO)[C@@H]1[C@@]2(C=O)[C@@H]([C@H]3[C@H]([C@@H](O)C2)[C@]2(C)C(=CC(=O)CC2)CC3)CC1	NA	0	Roy et al. ACS Omega. 2019; 4(16):16774-16780. DOI: 10.1021/acsomega.9b01512
711	O=C(CO)[C@@H]1[C@@]2(C)[C@@H]([C@@H]3[C@@H](C(=O)C2)[C@@]2(C)[C@@H](C[C@H](O)CC2)CC3)CC1	NA	1	Roy et al. ACS Omega. 2019; 4(16):16774-16780. DOI: 10.1021/acsomega.9b01512
712	O=C(CO)[C@@]12[C@]3(C)[C@@H]([C@@H]4[C@@H]([C@H](O)C3)[C@]3(C)C(=CC(=O)C=C3)CC4)C[C@@H]1OC(C)(C)O2	NA	1	Roy et al. ACS Omega. 2019; 4(16):16774-16780. DOI: 10.1021/acsomega.9b01512
713	O=C(CO)[C@@]12[C@]3(C)[C@@H]([C@@H]4[C@@H]([C@H](O)C3)[C@@]3(C)C(=CC(=O)C=C3)CC4)C[C@@H]1O[C@H](CCC)O2	NA	1	Roy et al. ACS Omega. 2019; 4(16):16774-16780. DOI: 10.1021/acsomega.9b01512
714	O=C(CO)[C@@]1(O)C[C@H](O[C@H]2O[C@H](C)[C@@H](O)[C@H](N)C2)c2c(O)c3C(=O)c4c(OC)cccc4C(=O)c3c(O)c2C1	15558402	0	Roy et al. ACS Omega. 2019; 4(16):16774-16780. DOI: 10.1021/acsomega.9b01512
715	O=C(CO)[C@@]1(O)C[C@@H](O[C@@H]2O[C@H](C)[C@@H](O)[C@H](N)C2)c2c(O)c3C(=O)c4c(C(=O)c3c(O)c2C1)cccc4	NA	0	Roy et al. ACS Omega. 2019; 4(16):16774-16780. DOI: 10.1021/acsomega.9b01512
716	O=C(CO)[C@@]1(O)[C@@H](C)C[C@H]2[C@]1(C)CC(=O)[C@H]1[C@]3(C)C(=CC(=O)C=C3)CC[C@H]21	124422931	1	Roy et al. ACS Omega. 2019; 4(16):16774-16780. DOI: 10.1021/acsomega.9b01512
717	O=C(CO)[C@@]1(O)[C@@]2(C)[C@H]([C@H]3[C@H](C(=O)C2)[C@@]2(C)C(=CC(=O)CC2)CC3)CC1	NA	1	Roy et al. ACS Omega. 2019; 4(16):16774-16780. DOI: 10.1021/acsomega.9b01512
718	O=C(CO)[C@@]1(O)[C@@]2(C)[C@H]([C@H]3[C@H]([C@@H](O)C2)[C@]2(C)C(=CC(=O)C=C2)CC3)CC1	NA	1	Roy et al. ACS Omega. 2019; 4(16):16774-16780. DOI: 10.1021/acsomega.9b01512
719	O=C(CO)[C@@]1(O)[C@@]2(C)[C@H]([C@H]3[C@@H]([C@]4(C)C(=CC(=O)CC4)CC3)CC2)CC1	NA	1	Roy et al. ACS Omega. 2019; 4(16):16774-16780. DOI: 10.1021/acsomega.9b01512
720	O=C(CO)[C@@]1(O)[C@@]2(C)[C@H]([C@H]3[C@@H]([C@]4(C)C(=CC(=O)C=C4)CC3)C(=O)C2)CC1	NA	1	Roy et al. ACS Omega. 2019; 4(16):16774-16780. DOI: 10.1021/acsomega.9b01512
721	O=C(Cn1ccnc1)c3ccc2ccccc2c3	51200	1	Zhao et al. J Chem Inf Model. 2007;47(1):170–175. DOI:10.1021/ci600312d
722	O=C(CN1CCN(C)CC1)[C@]1(O)[C@]2(C)[C@H]([C@H]3[C@@H]([C@H](O)C2)[C@]2(C)C(=CC(=O)C=C2)CC3)CC1	NA	1	Roy et al. ACS Omega. 2019; 4(16):16774-16780. DOI: 10.1021/acsomega.9b01512
723	O=C(CN1CCCC1=O)NNC(=O)CN2CCCC2=O	68793	1	Zhao et al. J Chem Inf Model. 2007;47(1):170–175. DOI:10.1021/ci600312d
724	O=C(CN1[C@H]2[C@@H]3[C@](c4c(ccc(O)c4)C2)(CC1)CCCC3)c1ccccc1	NA	1	Roy et al. ACS Omega. 2019; 4(16):16774-16780. DOI: 10.1021/acsomega.9b01512
725	O=C(CCNNC(=O)c1ccncc1)NCc2ccccc2	4472	1	Zhao et al. J Chem Inf Model. 2007;47(1):170–175. DOI:10.1021/ci600312d
726	O=C(CCCCC)CC[C@@]1(C)[C@]2(C)c3c(ccc(O)c3)C[C@@H]1N(C)CC2	NA	1	Roy et al. ACS Omega. 2019; 4(16):16774-16780. DOI: 10.1021/acsomega.9b01512
727	O=C(CCc1ccccc1)c1c(OC[C@@H](O)CNCCC)cccc1	184820	0	Roy et al. ACS Omega. 2019; 4(16):16774-16780. DOI: 10.1021/acsomega.9b01512
728	O=C(Cc1ccccc1)N1[C@@H](CN2C[C@H](O)CC2)CN(C(=O)C)CC1	44310943	0	Roy et al. ACS Omega. 2019; 4(16):16774-16780. DOI: 10.1021/acsomega.9b01512
729	O=C(Cc1ccc(OC)cc1)N1[C@@H](CN2C[C@H](O)CC2)CN(C(=O)C)CC1	44310707	0	Roy et al. ACS Omega. 2019; 4(16):16774-16780. DOI: 10.1021/acsomega.9b01512
730	O=C(Cc1cc(OC)ccc1)N1[C@@H](CN2C[C@H](O)CC2)CN(C(=O)C)CC1	44310775	0	Roy et al. ACS Omega. 2019; 4(16):16774-16780. DOI: 10.1021/acsomega.9b01512
731	O=C(CC)c1cc2N(C[C@H](N(C)C)C)c3c(Sc2cc1)cccc3	28125497	1	Roy et al. ACS Omega. 2019; 4(16):16774-16780. DOI: 10.1021/acsomega.9b01512
732	O=C(CC)[C@]1(C)[C@H](C)C[C@@H]2[C@@]1(C)C[C@H](O)[C@@H]1[C@@]3(C)C(=CC(=O)C=C3)CC[C@@H]21	NA	1	Roy et al. ACS Omega. 2019; 4(16):16774-16780. DOI: 10.1021/acsomega.9b01512
733	O=C(CC)[C@@]1(O)[C@@]2(C)[C@H]([C@H]3[C@H]([C@H](O)C2)[C@]2(C)C(=CC(=O)CC2)CC3)CC1	NA	1	Roy et al. ACS Omega. 2019; 4(16):16774-16780. DOI: 10.1021/acsomega.9b01512
734	O=C(c1ccccn1)c2cnn3c(ccnc23)c4ccncc4	216456	1	Zhao et al. J Chem Inf Model. 2007;47(1):170–175. DOI:10.1021/ci600312d
735	O=C(c1ccccc1)C=1NC2=[N+H][C-](OC)C(CC)=C(C)N2C=1	NA	1	Roy et al. ACS Omega. 2019; 4(16):16774-16780. DOI: 10.1021/acsomega.9b01512
736	O=C(C=Cc2ccc1OCOc1c2)N3CCCCC3	54930	1	Zhao et al. J Chem Inf Model. 2007;47(1):170–175. DOI:10.1021/ci600312d
737	O=C(C[C@@H]1N(C)[C@H](C[C@@H](O)c2ccccc2)CCC1)c1ccccc1	688025	1	Roy et al. ACS Omega. 2019; 4(16):16774-16780. DOI: 10.1021/acsomega.9b01512
738	O=C(C)N2C[C@@]([H])(CN1CC[C@@](O)([H])C1)N(CC2)C(=O)C/C3=C/C=C(C=C3)N(=O)=O	44311015	0	Shen et al. J Chem Inf Model. 2010;50(6):1034-1041. DOI: 10.1021/ci100104j
739	O=C(C)N2C[C@@]([H])(CN1CC[C@@](O)([H])C1)N(CC2)C(=O)C/C3=C/C=C(C=C3)C([F])([F])[F]	44310836	0	Shen et al. J Chem Inf Model. 2010;50(6):1034-1041. DOI: 10.1021/ci100104j
740	O=C(C)N2C[C@@]([H])(CN1CC[C@@](O)([H])C1)N(CC2)C(=O)C/C3=C/C=C(C=C3)[S](=O)C	44310636	0	Shen et al. J Chem Inf Model. 2010;50(6):1034-1041. DOI: 10.1021/ci100104j
741	O=C(C)N2C[C@@]([H])(CN1CC[C@@](O)([H])C1)N(CC2)C(=O)C/C3=C/C=C(C=C3)[S](=O)(=O)C	44310649	0	Shen et al. J Chem Inf Model. 2010;50(6):1034-1041. DOI: 10.1021/ci100104j
742	O=C(C)N2C[C@@]([H])(CN1CC[C@@](O)([H])C1)N(CC2)C(=O)C/C3=C/C=C(/OC)C=C3	44310705	0	Shen et al. J Chem Inf Model. 2010;50(6):1034-1041. DOI: 10.1021/ci100104j
743	O=C(C)N2C[C@@]([H])(CN1CC[C@@](O)([H])C1)N(CC2)C(=O)C/C3=C/C(=CC=C3)N(=O)=O	44310931	0	Shen et al. J Chem Inf Model. 2010;50(6):1034-1041. DOI: 10.1021/ci100104j
744	O=C(C)N2C[C@@]([H])(CN1CC[C@@](O)([H])C1)N(CC2)C(=O)C/C3=C/C([F])=CC([F])=C3	44311051	0	Shen et al. J Chem Inf Model. 2010;50(6):1034-1041. DOI: 10.1021/ci100104j
745	O=C(C)c1cc2N(C[C@@H](N(C)C)C)c3c(Sc2cc1)cccc3	44558892	1	Roy et al. ACS Omega. 2019; 4(16):16774-16780. DOI: 10.1021/acsomega.9b01512
746	O=C(C)C=1C(=O)[C@]2(O)C(=O)c3c(O)c4c(O)c(C)ccc4c(C)c3C[C@H]2[C@H](N)C=1O	93535517	0	Roy et al. ACS Omega. 2019; 4(16):16774-16780. DOI: 10.1021/acsomega.9b01512
747	O=C(C)[C@H]1[C@@]2(C)[C@H]([C@H]3[C@H]([C@]4(C)[C@H](C[C@@H](O)CC4)CC3)CC2)CC1	NA	1	Roy et al. ACS Omega. 2019; 4(16):16774-16780. DOI: 10.1021/acsomega.9b01512
748	O=C(C)[C@H]1[C@@]2(C)[C@H]([C@H]3[C@H]([C@@H](O)C2)[C@@]2(C)C([C@@H](C)C3)=CC(=O)C=C2)CC1	NA	1	Roy et al. ACS Omega. 2019; 4(16):16774-16780. DOI: 10.1021/acsomega.9b01512
749	O=C(C)[C@H]1[C@@]2(C)[C@@H]([C@@H]3[C@H]([C@H](N(C)C)C2)[C@@]2(C)[C@@H](C[C@H](O)[C@@H](OCC)C2)CC3)CC1	NA	1	Roy et al. ACS Omega. 2019; 4(16):16774-16780. DOI: 10.1021/acsomega.9b01512
750	O=C(C)[C@H]1[C@@]2(C)[C@@H]([C@@H]3[C@@H](C(=O)C2)[C@@]2(C)[C@@H](C[C@H](O)CC2)CC3)CC1	NA	1	Roy et al. ACS Omega. 2019; 4(16):16774-16780. DOI: 10.1021/acsomega.9b01512
751	O=C(C)[C@]1(O)C[C@H](O[C@H]2O[C@H](C)[C@@H](O)[C@H](N)C2)c2c(O)c3C(=O)c4c(OC)cccc4C(=O)c3c(O)c2C1	NA	0	Roy et al. ACS Omega. 2019; 4(16):16774-16780. DOI: 10.1021/acsomega.9b01512
752	O=C(C)[C@]1(O)[C@H](O)C[C@@H]2[C@@]1(C)CC[C@@H]1[C@@]3(C)C(=CC(=O)CC3)CC[C@@H]21	NA	1	Roy et al. ACS Omega. 2019; 4(16):16774-16780. DOI: 10.1021/acsomega.9b01512
753	O=C(C)[C@]1(O)[C@]2(C)[C@@H]([C@@H]3[C@@H]([C@H](O)C2)[C@@]2(C)C(=CC(=O)C=C2)CC3)CC1	29926695	1	Roy et al. ACS Omega. 2019; 4(16):16774-16780. DOI: 10.1021/acsomega.9b01512
754	O=C(C)[C@@H]1[C@]2(C)[C@H]([C@H]3[C@@H]([C@]4(C)C(=CC(=O)CC4)CC3)CC2)CC1	5994	1	Roy et al. ACS Omega. 2019; 4(16):16774-16780. DOI: 10.1021/acsomega.9b01512
755	O=C(C)[C@@H]1[C@]2(C)[C@H]([C@H]3[C@@H]([C@]4(C)[C@]5([C@@H](O)C3)[C@@H](C5)CC4)CC2)CC1	99575158	1	Roy et al. ACS Omega. 2019; 4(16):16774-16780. DOI: 10.1021/acsomega.9b01512
756	O=C(C)[C@@H]1[C@]2(C)[C@@H]([C@@H]3[C@@H]([C@@]4(C)[C@@H](C[C@](O)(C)CC4)CC3)CC2)CC1	NA	1	Roy et al. ACS Omega. 2019; 4(16):16774-16780. DOI: 10.1021/acsomega.9b01512
757	O=C(C)[C@@]12[C@]3(C)[C@@H]([C@@H]4[C@@H]([C@@]5(C)C(=CC(=O)CC5)CC4)CC3)C[C@@H]1OC(C)(C)O2	NA	1	Roy et al. ACS Omega. 2019; 4(16):16774-16780. DOI: 10.1021/acsomega.9b01512
758	O=C(C)[C@@]1(O)C[C@H](O[C@@H]2O[C@@H](C)[C@H](O)[C@@H](N)C2)c2c(O)c3C(=O)c4c(O)cccc4C(=O)c3c(O)c2C1	NA	0	Roy et al. ACS Omega. 2019; 4(16):16774-16780. DOI: 10.1021/acsomega.9b01512
759	O=C(C)[C@@]1(O)C[C@H](O[C@@H]2O[C@@H](C)[C@H](O)[C@@H](N)C2)c2c(O)c3C(=O)c4c(C(=O)c3c(O)c2C1)cccc4	15573192	0	Roy et al. ACS Omega. 2019; 4(16):16774-16780. DOI: 10.1021/acsomega.9b01512
760	O=C(C)[C@@]1(N)C[C@@H](O[C@@H]2OC[C@H](O)[C@H](O)C2)c2c(O)c3C(=O)c4c(C(=O)c3c(O)c2C1)cccc4	NA	0	Roy et al. ACS Omega. 2019; 4(16):16774-16780. DOI: 10.1021/acsomega.9b01512
761	O=C(C(C[C@@H](N(C)C)C)(c1ccccc1)c1ccccc1)CC	643985	1	Roy et al. ACS Omega. 2019; 4(16):16774-16780. DOI: 10.1021/acsomega.9b01512
762	O=C(C(=C)[C@@]1(C)[C@]2(O[C@@H](/C=C/C)OC2)[C@H]2[C@H]([C@H](O)C1)[C@]1(C)C(=CC(=O)CC1)CC2)COC(=O)c1ccncc1	NA	1	Roy et al. ACS Omega. 2019; 4(16):16774-16780. DOI: 10.1021/acsomega.9b01512
763	O=C(C([C@H](CN(C)C)C)(c1ccccc1)c1ccccc1)CC	12358631	1	Roy et al. ACS Omega. 2019; 4(16):16774-16780. DOI: 10.1021/acsomega.9b01512
764	O=C(C([C@@H](CN1CCOCC1)C)(c1ccccc1)c1ccccc1)N1CCCC1	92943	1	Roy et al. ACS Omega. 2019; 4(16):16774-16780. DOI: 10.1021/acsomega.9b01512
765	O=C([C@H](N)C)c1ccccc1	149798	1	Roy et al. ACS Omega. 2019; 4(16):16774-16780. DOI: 10.1021/acsomega.9b01512
766	O=C([C@@H](O)[C@H](O)C)[C@@H](OC)[C@H]1[C@H](O[C@@H]2O[C@H](C)[C@@H](O)[C@H](O[C@@H]3O[C@H](C)[C@@H](O)[C@H](O[C@@H]4O[C@H](C)[C@@H](O)[C@](O)(C)C4)C3)C2)C(=O)c2c(O)c3c(O)c(C)c(O[C@@H]4O[C@H](C)[C@H](O)[C@H](O[C@@H]5O[C@H](C)[C@@H](O)[C@H](O)C5)C4)cc3cc2C1	457831	1	Roy et al. ACS Omega. 2019; 4(16):16774-16780. DOI: 10.1021/acsomega.9b01512
767	O=C([C@@H](NC)C)c1ccc(OC)cc1	51371469	0	Roy et al. ACS Omega. 2019; 4(16):16774-16780. DOI: 10.1021/acsomega.9b01512
768	O=C([C@@H](N(C)C)C)c1ccccc1	13110870	1	Roy et al. ACS Omega. 2019; 4(16):16774-16780. DOI: 10.1021/acsomega.9b01512
769	O=C([C@@H](CCC)N1CCCC1)c1ccc(C)cc1	11425104	1	Roy et al. ACS Omega. 2019; 4(16):16774-16780. DOI: 10.1021/acsomega.9b01512
770	O=C(/C=C/N1CC=CC1)c1cc(OC)c(OC)c(OC)c1	6433520	1	Roy et al. ACS Omega. 2019; 4(16):16774-16780. DOI: 10.1021/acsomega.9b01512
771	O=C(/C=C/C2=C/C=C1OCOC1=C2)N3CCCCC3	641115	1	Shen et al. J Chem Inf Model. 2010;50(6):1034-1041. DOI: 10.1021/ci100104j
772	O=C(/C=C/1\c2c(cccc2)CCc2c\1cccc2)CN(C)C	213987	1	Roy et al. ACS Omega. 2019; 4(16):16774-16780. DOI: 10.1021/acsomega.9b01512
773	O=[N+]([O-])c1ccc(CC(=O)N2[C@@H](CN3C[C@@H](O)CC3)CN(C(=O)C)CC2)cc1	44311016	0	Roy et al. ACS Omega. 2019; 4(16):16774-16780. DOI: 10.1021/acsomega.9b01512
774	O=[N+]([O-])c1ccc([C@H](O)[C@H](NC(=O)C[N-][N+H]=N)CO)cc1	NA	1	Roy et al. ACS Omega. 2019; 4(16):16774-16780. DOI: 10.1021/acsomega.9b01512
775	O=[N+]([O-])c1cc(CC(=O)N2[C@@H](CN3C[C@@H](O)CC3)CN(C(=O)C)CC2)ccc1	44310946	0	Roy et al. ACS Omega. 2019; 4(16):16774-16780. DOI: 10.1021/acsomega.9b01512
776	O=[N+]([O-])c1cc([C@@H]2C(C(=O)OCCN(Cc3ccccc3)C)=C(C)NC(C)=C2C(=O)OC)ccc1	6604415	0	Roy et al. ACS Omega. 2019; 4(16):16774-16780. DOI: 10.1021/acsomega.9b01512
777	O=[N+]([O-])c1cc([C@@H]2C(C(=O)OCC)=C(C)NC(C)=C2C(=O)OC)ccc1	157702	0	Roy et al. ACS Omega. 2019; 4(16):16774-16780. DOI: 10.1021/acsomega.9b01512
778	O=[N+]([O-])c1c2c(c(O)cc1)C(=O)C1=C(O)[C@@]3(O)C(=O)C(C(=O)N)=C(O)[C@H](N(C)C)[C@@H]3C[C@@H]1C2	NA	0	Roy et al. ACS Omega. 2019; 4(16):16774-16780. DOI: 10.1021/acsomega.9b01512
779	O=[N+]([O-])c1c(N)cc(OCC)c(C(=O)NC2CCN(C[C@H]3CC=CCC3)CC2)c1	92260138	1	Roy et al. ACS Omega. 2019; 4(16):16774-16780. DOI: 10.1021/acsomega.9b01512
780	O=[N+]([O-])c1c(-c2oc([C-]([N+H3])N)cc2)cccc1	NA	1	Roy et al. ACS Omega. 2019; 4(16):16774-16780. DOI: 10.1021/acsomega.9b01512
781	O[P](O)(=O)CN1C(=O)NC(C1=O)(C2=CC=CC=C2)C3=CC=CC=C3	56339	1	Shen et al. J Chem Inf Model. 2010;50(6):1034-1041. DOI: 10.1021/ci100104j
782	O[C@H]1c2c(N)c3c(nc2CCC1)cccc3	703684	1	Roy et al. ACS Omega. 2019; 4(16):16774-16780. DOI: 10.1021/acsomega.9b01512
783	O[C@H]1[C@]2(C)[C@H]([C@H]3[C@H](c4c(cc(O)cc4)CC3)CC2)CC1	11869602	0	Roy et al. ACS Omega. 2019; 4(16):16774-16780. DOI: 10.1021/acsomega.9b01512
784	O[C@H]1[C@@H]2Oc3c(O)ccc4c3[C@@]32[C@H]([C@H](N(C)CC3)C4)C=C1	5324287	1	Roy et al. ACS Omega. 2019; 4(16):16774-16780. DOI: 10.1021/acsomega.9b01512
785	O[C@H]1[C@@H]2Oc3c(O)ccc4c3[C@@]32[C@@](O)([C@H](N(CC2CCC2)CC3)C4)CC1	NA	1	Roy et al. ACS Omega. 2019; 4(16):16774-16780. DOI: 10.1021/acsomega.9b01512
786	O[C@H]1[C@@H]2Oc3c(O)ccc4c3[C@@]32[C@@](O)([C@H](N(C)CC3)C4)CC1	NA	1	Roy et al. ACS Omega. 2019; 4(16):16774-16780. DOI: 10.1021/acsomega.9b01512
787	O[C@H](CNCC)c1cc(O)ccc1	1715119	0	Roy et al. ACS Omega. 2019; 4(16):16774-16780. DOI: 10.1021/acsomega.9b01512
788	O[C@H](CNC)CC12c3c(cccc3)C(c3c1cccc3)CC2	156410	1	Roy et al. ACS Omega. 2019; 4(16):16774-16780. DOI: 10.1021/acsomega.9b01512
789	O[C@H](CNC(C)(C)C)c1cc(CO)c(O)cc1	182176	0	Roy et al. ACS Omega. 2019; 4(16):16774-16780. DOI: 10.1021/acsomega.9b01512
790	O[C@H](CN1CCCCC1)c1noc(-c2ccccc2)c1	76964572	1	Roy et al. ACS Omega. 2019; 4(16):16774-16780. DOI: 10.1021/acsomega.9b01512
791	O[C@H](CCCN1CCC(C(O)(c2ccccc2)c2ccccc2)CC1)c1ccc(C(C)(C)C)cc1	7048803	0	Roy et al. ACS Omega. 2019; 4(16):16774-16780. DOI: 10.1021/acsomega.9b01512
792	O[C@H](C(C[C@@H](N(C)C)C)(c1ccccc1)c1ccccc1)CC	3041256	1	Roy et al. ACS Omega. 2019; 4(16):16774-16780. DOI: 10.1021/acsomega.9b01512
793	O[C@H](C(C)(C)C)/C=C/c1cc2OCOc2cc1	25271730	1	Roy et al. ACS Omega. 2019; 4(16):16774-16780. DOI: 10.1021/acsomega.9b01512
794	O[C@H]([C@H](NC)C)c1ccc(O)cc1	688012	0	Roy et al. ACS Omega. 2019; 4(16):16774-16780. DOI: 10.1021/acsomega.9b01512
795	O[C@]12[C@@H](c3c(c(C)ccc3)Oc3c1cccc3)CN(C)CC2	NA	1	Roy et al. ACS Omega. 2019; 4(16):16774-16780. DOI: 10.1021/acsomega.9b01512
796	O[C@]12[C@@H](C)CN(C)C[C@H]1Cc1c3c(ccc1O2)cccc3	76957396	1	Roy et al. ACS Omega. 2019; 4(16):16774-16780. DOI: 10.1021/acsomega.9b01512
797	O[C@]1(CC)C[C@@H]2[N@](CC1)CCc1c2cc(C)cc1	76961504	1	Roy et al. ACS Omega. 2019; 4(16):16774-16780. DOI: 10.1021/acsomega.9b01512
798	O[C@]1(C(C)C)C[C@@H]2[N@](C[C@H]3c4c2cccc4CCc2c3cccc2)CC1	124349271	1	Roy et al. ACS Omega. 2019; 4(16):16774-16780. DOI: 10.1021/acsomega.9b01512
799	O[C@](C#C)(CC)C	639841	1	Roy et al. ACS Omega. 2019; 4(16):16774-16780. DOI: 10.1021/acsomega.9b01512
800	O[C@@H]1[C@H]2Oc3c(O)ccc4c3[C@]32[C@H]([C@@H](NCC3)C4)C=C1	NA	1	Roy et al. ACS Omega. 2019; 4(16):16774-16780. DOI: 10.1021/acsomega.9b01512
801	O[C@@H]1[C@H]2Oc3c(O)ccc4c3[C@]32[C@@H]([C@@H](N(CC=C)CC3)C4)C=C1	NA	1	Roy et al. ACS Omega. 2019; 4(16):16774-16780. DOI: 10.1021/acsomega.9b01512
802	O[C@@H](CNC)c1cc(O)c(O)cc1	5816	0	Roy et al. ACS Omega. 2019; 4(16):16774-16780. DOI: 10.1021/acsomega.9b01512
803	O[C@@H](Cn1cncc1)c1ccc(CCc2ccccc2)cc1	76965184	1	Roy et al. ACS Omega. 2019; 4(16):16774-16780. DOI: 10.1021/acsomega.9b01512
804	O[C@@H](CN)c1cc(O)ccc1	719235	0	Roy et al. ACS Omega. 2019; 4(16):16774-16780. DOI: 10.1021/acsomega.9b01512
805	O[C@@H](C(C)C)C1CCCCC1	53466230	1	Roy et al. ACS Omega. 2019; 4(16):16774-16780. DOI: 10.1021/acsomega.9b01512
806	O[C@@H]([C@H](O)[C@H](O)CO)[C@H](O)CO	6251	0	Roy et al. ACS Omega. 2019; 4(16):16774-16780. DOI: 10.1021/acsomega.9b01512
807	O[C@@H]([C@@H](N)C)c1cc(O)ccc1	5906	0	Roy et al. ACS Omega. 2019; 4(16):16774-16780. DOI: 10.1021/acsomega.9b01512
808	O[C@@]4([H])CCN(CCCN2C1=CC=CC=C1[S]C3=C/C=C(/C#N)C=C23)CC4	4747	1	Shen et al. J Chem Inf Model. 2010;50(6):1034-1041. DOI: 10.1021/ci100104j
809	O[C@@]3([H])N=C(/C1=C/C=C/C=C1/[F])C2=CC([Cl])=CC=C2N(CCC#N)C3=O	3033621	1	Shen et al. J Chem Inf Model. 2010;50(6):1034-1041. DOI: 10.1021/ci100104j
810	O[C@@]2(C1=NCCCN1C3=CC=CC=C23)C4=CC=C/C=C4/[Cl]	37825	1	Shen et al. J Chem Inf Model. 2010;50(6):1034-1041. DOI: 10.1021/ci100104j
811	O[C@@]2([H])O[C@@]([H])(COCCO[C@@](O)([H])C([Cl])([Cl])[Cl])[C@@]([H])(O[C@@]1([H])O[C@@]([H])(COCCOCCO[C@@](O)([H])C([Cl])([Cl])[Cl])C[C@@]([H])(O[C@@](O)([H])C([Cl])([Cl])[Cl])[C@@]1(O)[H])[C@@]([H])(OCCOCCO[C@@](O)([H])C([Cl])([Cl])[Cl])[C@@]2(O)[H]	NA	1	Shen et al. J Chem Inf Model. 2010;50(6):1034-1041. DOI: 10.1021/ci100104j
812	O[C@@]12[C@@H](c3c(c(C)ccc3)Oc3c1cccc3)CNCC2	67837662	1	Roy et al. ACS Omega. 2019; 4(16):16774-16780. DOI: 10.1021/acsomega.9b01512
813	O[C@@]1(C(C)(C)C)C[C@H]2[N@@](C[C@H]3c4c2cccc4CCc2c3cccc2)CC1	37461	1	Roy et al. ACS Omega. 2019; 4(16):16774-16780. DOI: 10.1021/acsomega.9b01512
814	O[C@@]1([H])CC[C@@]2(O)[C@@]3([H])CC5=C/C=C(/O)C=6O[C@@]1([H])[C@@]2(CCN3C[C@@]4([H])CCC4)C5=6	5311304	1	Shen et al. J Chem Inf Model. 2010;50(6):1034-1041. DOI: 10.1021/ci100104j
815	O[C@@]1([H])C=C[C@@]2([H])[C@@]3([H])CC4=C/C=C(/O)C=5O[C@@]1([H])[C@@]2(CCN3CC=C)C4=5	5284595	1	Shen et al. J Chem Inf Model. 2010;50(6):1034-1041. DOI: 10.1021/ci100104j
816	O[C@@]([H])(CO[C@@]1(CCCCC1)C#C)CN2CCN(CC2)C3=C/C=C(/[F])C=C3	216227	1	Shen et al. J Chem Inf Model. 2010;50(6):1034-1041. DOI: 10.1021/ci100104j
817	O[C@@]([H])(C(=O)N[C@@]1([H])C(=O)N2C(=C(C[S][C@@]12[H])C[S]/C3=N/N=NN3C[S](O)(=O)=O)C(O)=O)C4=CC=CC=C4	43594	0	Shen et al. J Chem Inf Model. 2010;50(6):1034-1041. DOI: 10.1021/ci100104j
818	O/C4=C/C=C3C[C@@]1([H])N(CC[C@@]2(CCCC[C@@]12O)C3=C4)C[C@@]5([H])CCC5	5361092	1	Shen et al. J Chem Inf Model. 2010;50(6):1034-1041. DOI: 10.1021/ci100104j
819	O/C4=C/C=C3C[C@@]1([H])N(CC[C@@]2(CCCC[C@@]12O)C3=C4)C[C@@]5([H])CC5	5361090	1	Shen et al. J Chem Inf Model. 2010;50(6):1034-1041. DOI: 10.1021/ci100104j
820	O/C4=C/C=C3C[C@@]1([H])N(CC[C@@]2(CCCC[C@@]12[H])C3=C4)CC=C	5359371	1	Shen et al. J Chem Inf Model. 2010;50(6):1034-1041. DOI: 10.1021/ci100104j
821	O/C4=C/C=C3C[C@@]1([H])N(CC[C@@]2(CCCC[C@@]12[H])C3=C4)CC(=O)C5=CC=CC=C5	5362482	1	Shen et al. J Chem Inf Model. 2010;50(6):1034-1041. DOI: 10.1021/ci100104j
822	O/C3=C/C=CC=4C[C@@]1([H])N(CC[C@@]2(CC(=O)CC[C@@]12[H])C3=4)C[C@@]5([H])CC5	5490677	1	Shen et al. J Chem Inf Model. 2010;50(6):1034-1041. DOI: 10.1021/ci100104j
823	O/C2=C/C=C1C[C@@]4([H])N(CC[C@@]35C1=C2O[C@@]3([H])C(=O)CC[C@@]45O)CC=C	5284596	1	Shen et al. J Chem Inf Model. 2010;50(6):1034-1041. DOI: 10.1021/ci100104j
824	O/C2=C/C=C1C[C@@]4([H])N(CC[C@@]35C1=C2O[C@@]3([H])C(=O)CC[C@@]45O)C[C@@]6([H])CC6	5360515	1	Shen et al. J Chem Inf Model. 2010;50(6):1034-1041. DOI: 10.1021/ci100104j
825	O/C2=C/C=C1C[C@@]4([H])N(CC[C@@]35C1=C2O[C@@]3([H])C(=C)CC[C@@]45O)C[C@@]6([H])CC6	5284594	1	Shen et al. J Chem Inf Model. 2010;50(6):1034-1041. DOI: 10.1021/ci100104j
826	O(CCOC)C[C@H]1O[C@H]2[C@@H](C)[C@@H]([C@H](C)C[C@@](O)(C)[C@H](O[C@@H]3[C@H](O)[C@@H](N(C)C)C[C@H](C)O3)[C@@H](C)[C@H](O[C@@H]3O[C@H](C)[C@H](O)[C@](OC)(C)C3)[C@@H](C)C(=O)O[C@@H](CC)[C@]2(O)C)N1	NA	0	Roy et al. ACS Omega. 2019; 4(16):16774-16780. DOI: 10.1021/acsomega.9b01512
827	O(CCO)Cn1c2NC(N)=NCc2nc1	129869467	1	Roy et al. ACS Omega. 2019; 4(16):16774-16780. DOI: 10.1021/acsomega.9b01512
828	O(CCN1[C@@H]2[C@@]3(O)[C@]4([C@H](C(=O)CC3)Oc3c(O)ccc(c43)C2)CC1)C	NA	1	Roy et al. ACS Omega. 2019; 4(16):16774-16780. DOI: 10.1021/acsomega.9b01512
829	O(CCN(C)C)c1ccc(/C(=C(\CC)/c2ccccc2)/c2ccccc2)cc1	3032583	0	Roy et al. ACS Omega. 2019; 4(16):16774-16780. DOI: 10.1021/acsomega.9b01512
830	O(CCN(C)C)[C@]1(Cc2ccccc2)[C@@]2(C)C(C)(C)[C@@H](C1)CC2	76960606	1	Roy et al. ACS Omega. 2019; 4(16):16774-16780. DOI: 10.1021/acsomega.9b01512
831	O(CCCN[C-]([N+H3])N)c1ccccc1	NA	1	Roy et al. ACS Omega. 2019; 4(16):16774-16780. DOI: 10.1021/acsomega.9b01512
832	O(CCc1ccc(OC[C@H](O)CNC(C)C)cc1)C	157717	1	Roy et al. ACS Omega. 2019; 4(16):16774-16780. DOI: 10.1021/acsomega.9b01512
833	O(CC)c1c2O[C@H](CNCCCC)COc2ccc1	76959587	1	Roy et al. ACS Omega. 2019; 4(16):16774-16780. DOI: 10.1021/acsomega.9b01512
834	O(CC)c1c(OC[C@@H]2OCCNC2)cccc1	12226596	1	Roy et al. ACS Omega. 2019; 4(16):16774-16780. DOI: 10.1021/acsomega.9b01512
835	O(CC)[C@H]1c2c(N(C)C(=O)c3c1cccc3)cccc2	76956927	1	Roy et al. ACS Omega. 2019; 4(16):16774-16780. DOI: 10.1021/acsomega.9b01512
836	O(C[C@H]1OCCNC1)c1c(Cc2sccc2)cccc1	11608975	1	Roy et al. ACS Omega. 2019; 4(16):16774-16780. DOI: 10.1021/acsomega.9b01512
837	O(C[C@H]1OC(=O)NC1)c1cc(C)cc(C)c1	28125517	1	Roy et al. ACS Omega. 2019; 4(16):16774-16780. DOI: 10.1021/acsomega.9b01512
838	O(C[C@H]1OC(=O)N(c2ccc(OCc3cc(C#N)ccc3)cc2)C1)C	24835267	1	Roy et al. ACS Omega. 2019; 4(16):16774-16780. DOI: 10.1021/acsomega.9b01512
839	O(C[C@H]1[C@H](O)[C@@H](O)[C@H](O)[C@H](Oc2cc(O)c3C(=O)C=C(c4cc(O)c(OC)cc4)Oc3c2)O1)[C@H]1[C@H](O)[C@H](O)[C@@H](O)[C@@H](C)O1	NA	0	Roy et al. ACS Omega. 2019; 4(16):16774-16780. DOI: 10.1021/acsomega.9b01512
840	O(C[C@H](O)CNC(C)C)c1c2c(ccc1)cccc2	21138	0	Roy et al. ACS Omega. 2019; 4(16):16774-16780. DOI: 10.1021/acsomega.9b01512
841	O(C[C@H](O)CNC(C)C)c1c2c([nH]cc2)ccc1	155030	1	Roy et al. ACS Omega. 2019; 4(16):16774-16780. DOI: 10.1021/acsomega.9b01512
842	O(C[C@H](O)CNC(C)(C)C)c1c2c(ccc1)C[C@H](O)[C@@H](O)C2	92170354	0	Roy et al. ACS Omega. 2019; 4(16):16774-16780. DOI: 10.1021/acsomega.9b01512
843	O(C[C@H](O)CN1CCN(c2c(OC)cccc2)CC1)c1cc(OC)c(OC)c(OC)c1	29919953	1	Roy et al. ACS Omega. 2019; 4(16):16774-16780. DOI: 10.1021/acsomega.9b01512
844	O(C[C@H](N)C)c1c(C)cccc1C	180621	1	Roy et al. ACS Omega. 2019; 4(16):16774-16780. DOI: 10.1021/acsomega.9b01512
845	O(C[C@H](CN(Cc1ccccc1)c1ccccc1)N1CCCC1)CC(C)C	445143	0	Roy et al. ACS Omega. 2019; 4(16):16774-16780. DOI: 10.1021/acsomega.9b01512
846	O(C[C@@H]1OCCNC1)c1c2N(C)CCCc2ccc1	6336171	1	Roy et al. ACS Omega. 2019; 4(16):16774-16780. DOI: 10.1021/acsomega.9b01512
847	O(C[C@@H]1OCCNC1)c1c2c(ccc1)C=CC2	67212739	1	Roy et al. ACS Omega. 2019; 4(16):16774-16780. DOI: 10.1021/acsomega.9b01512
848	O(C[C@@H]1OC(=O)NC1)c1c(OC)cccc1	76972536	1	Roy et al. ACS Omega. 2019; 4(16):16774-16780. DOI: 10.1021/acsomega.9b01512
849	O(C[C@@H]1[C@@H](c2ccccc2)CCN(C)C1)c1ccc(OC)cc1	3012003	1	Roy et al. ACS Omega. 2019; 4(16):16774-16780. DOI: 10.1021/acsomega.9b01512
850	O(C[C@@H](NN)C)c1ccccc1	76971559	1	Roy et al. ACS Omega. 2019; 4(16):16774-16780. DOI: 10.1021/acsomega.9b01512
851	O(C)c1ccc(N2C(=O)O[C@H](CN3CCC(O)(c4cc5OCOc5cc4)CC3)C2)cc1	15034726	1	Roy et al. ACS Omega. 2019; 4(16):16774-16780. DOI: 10.1021/acsomega.9b01512
852	O(C)c1ccc([C@H](CN(C)C)C2(O)CCCCC2)cc1	9795623	1	Roy et al. ACS Omega. 2019; 4(16):16774-16780. DOI: 10.1021/acsomega.9b01512
853	O(C)c1cc2N(CC[C@H]3N(C)CCCC3)c3c(Sc2cc1)cccc3	53298655	1	Roy et al. ACS Omega. 2019; 4(16):16774-16780. DOI: 10.1021/acsomega.9b01512
854	O(C)c1cc2N(C[C@H](CN(C)C)C)c3c(Sc2cc1)cccc3	165002	1	Roy et al. ACS Omega. 2019; 4(16):16774-16780. DOI: 10.1021/acsomega.9b01512
855	O(C)c1cc2N(C[C@@H](CN3CCC(O)CC3)C)c3c(Sc2cc1)cccc3	86310135	1	Roy et al. ACS Omega. 2019; 4(16):16774-16780. DOI: 10.1021/acsomega.9b01512
856	O(C)c1cc2c(CCC[C@H]3[C@H](C=C)CNCC3)ccnc2cc1	3038482	1	Roy et al. ACS Omega. 2019; 4(16):16774-16780. DOI: 10.1021/acsomega.9b01512
857	O(C)c1cc2[C@@](O)(CCCN(C)C)c3c(Sc2cc1)cccc3	76968631	1	Roy et al. ACS Omega. 2019; 4(16):16774-16780. DOI: 10.1021/acsomega.9b01512
858	O(C)c1cc2/C(=C/CCN(C)C)/c3c(Oc2cc1)cccc3	6445008	1	Roy et al. ACS Omega. 2019; 4(16):16774-16780. DOI: 10.1021/acsomega.9b01512
859	O(C)c1cc(CN[C@H]2[C@H](c3ccccc3)NCCC2)c2OCCc2c1	NA	1	Roy et al. ACS Omega. 2019; 4(16):16774-16780. DOI: 10.1021/acsomega.9b01512
860	O(C)c1cc([C@]2(O)[C@@H](CN(C)C)CCCC2)ccc1	33741	1	Roy et al. ACS Omega. 2019; 4(16):16774-16780. DOI: 10.1021/acsomega.9b01512
861	O(C)c1c2O[C@H]3C(=O)CC[C@]4(O)[C@@H]5N(C)CC[C@]34c2c(cc1)C5	124301666	1	Roy et al. ACS Omega. 2019; 4(16):16774-16780. DOI: 10.1021/acsomega.9b01512
862	O(C)c1c2O[C@H]3[C@H](O)C=C[C@@H]4[C@@H]5NCC[C@]34c2c(cc1)C5	NA	1	Roy et al. ACS Omega. 2019; 4(16):16774-16780. DOI: 10.1021/acsomega.9b01512
863	O(C)c1c2O[C@@H]3C(=O)CC[C@@H]4[C@H]5N(C)CC[C@@]34c2c(cc1)C5	5420817	1	Roy et al. ACS Omega. 2019; 4(16):16774-16780. DOI: 10.1021/acsomega.9b01512
864	O(C)c1c2O[C@@H]3C(=O)C[C@@H](CC)[C@@H]4[C@H]5N(CC6CC6)CC[C@@]34c2c(cc1)C5	NA	1	Roy et al. ACS Omega. 2019; 4(16):16774-16780. DOI: 10.1021/acsomega.9b01512
865	O(C)c1c2O[C@@H]3[C@]4(c2c(cc1)CN(C)CC4)C=C[C@@H](O)C3	676392	1	Roy et al. ACS Omega. 2019; 4(16):16774-16780. DOI: 10.1021/acsomega.9b01512
866	O(C)c1c2O[C@@H]3[C@@H](O)CC[C@@H]4[C@H]5N(C)CC[C@@]34c2c(cc1)C5	NA	1	Roy et al. ACS Omega. 2019; 4(16):16774-16780. DOI: 10.1021/acsomega.9b01512
867	O(C)c1c2O[C@@H]3[C@@H](O)C=C[C@@H]4[C@H]5N(C)CC[C@@]34c2c(cc1)C5	51018332	1	Roy et al. ACS Omega. 2019; 4(16):16774-16780. DOI: 10.1021/acsomega.9b01512
868	O(C)c1c2c(OC[C@@H](CCCNCCCCN3C(=O)CC4(CC3=O)CCCC4)C2)ccc1	69889526	1	Roy et al. ACS Omega. 2019; 4(16):16774-16780. DOI: 10.1021/acsomega.9b01512
869	O(C)c1c2C(=O)c3c(O)c4[C@H](O)C[C@@](O)([C@@H](O)CO)Cc4c(O)c3C(=O)c2ccc1	124389688	0	Roy et al. ACS Omega. 2019; 4(16):16774-16780. DOI: 10.1021/acsomega.9b01512
870	O(C)c1c(OC2CCCC2)cc([C@@H]2CC(=O)NC2)cc1	158758	1	Roy et al. ACS Omega. 2019; 4(16):16774-16780. DOI: 10.1021/acsomega.9b01512
871	O(C)c1c(OC)ccc2c1[C@@]13[C@](O)([C@H](N(C)CC1)C2)CC[C@H](O)C3	5492871	1	Roy et al. ACS Omega. 2019; 4(16):16774-16780. DOI: 10.1021/acsomega.9b01512
872	O(C)c1c(OC)ccc2[C@@H]([C@H]3N(C)CCc4c3c(OC)c3OCOc3c4)OC(=O)c12	1712056	1	Roy et al. ACS Omega. 2019; 4(16):16774-16780. DOI: 10.1021/acsomega.9b01512
873	O(C)c1c(OC)ccc(C2=NN=C(C)[C@@H](CC)c3c2cc(OC)c(OC)c3)c1	7048810	1	Roy et al. ACS Omega. 2019; 4(16):16774-16780. DOI: 10.1021/acsomega.9b01512
874	O(C)c1c(OC)ccc(C=2N(N)C(C)=C(CC)[C@@H]3C=2C=C(OC)C(OC)=C3)c1	NA	1	Roy et al. ACS Omega. 2019; 4(16):16774-16780. DOI: 10.1021/acsomega.9b01512
875	O(C)c1c(OC)ccc([C@H](O)CN2CCN(C(c3ccccc3)c3ccccc3)CC2)c1	76961249	1	Roy et al. ACS Omega. 2019; 4(16):16774-16780. DOI: 10.1021/acsomega.9b01512
876	O(C)c1c(OC)ccc([C@@H](O)CN2CCN(C=3C(=O)C=CC=CC=3)CC2)c1	13298564	1	Roy et al. ACS Omega. 2019; 4(16):16774-16780. DOI: 10.1021/acsomega.9b01512
877	O(C)c1c(OC)ccc([C@@](C#N)(C(C)C)CCCN(CCc2cc(OC)c(OC)cc2)C)c1	92305	0	Roy et al. ACS Omega. 2019; 4(16):16774-16780. DOI: 10.1021/acsomega.9b01512
878	O(C)c1c(OC)cc2c(C(=O)[C@H](CC3CCN(Cc4ccccc4)CC3)C2)c1	1150567	1	Roy et al. ACS Omega. 2019; 4(16):16774-16780. DOI: 10.1021/acsomega.9b01512
879	O(C)c1c(OC)cc2c([C@H]3[N@](C[C@@H](CC(C)C)C(=O)C3)CC2)c1	6540815	1	Roy et al. ACS Omega. 2019; 4(16):16774-16780. DOI: 10.1021/acsomega.9b01512
880	O(C)c1c(OC)cc2c([C@H](c3ccccc3)CN(C)CC2)c1	6603996	1	Roy et al. ACS Omega. 2019; 4(16):16774-16780. DOI: 10.1021/acsomega.9b01512
881	O(C)c1c(OC)cc2c([C@H](C[C@@H]3[C@@H](CC)C[N@@]4[C@H](c5c(cc(OC)c(OC)c5)CC4)C3)NCC2)c1	164646	0	Roy et al. ACS Omega. 2019; 4(16):16774-16780. DOI: 10.1021/acsomega.9b01512
882	O(C)c1c(O)c2C3(C=CC(=O)C=C3)C[C@H]3N(C)CCc(c23)c1	442245	1	Roy et al. ACS Omega. 2019; 4(16):16774-16780. DOI: 10.1021/acsomega.9b01512
883	O(C)c1c(N2CCN(CCCCN3C(=O)[C@@H]4C(=O)N(C(C)(C)C)C(=O)[C@@H](C3=O)C4(C)C)CC2)cccc1	NA	1	Roy et al. ACS Omega. 2019; 4(16):16774-16780. DOI: 10.1021/acsomega.9b01512
884	O(C)c1c(CCCCNC2=NC(=O)[C@H](Cc3cnc(C)cc3)C=N2)nccc1	NA	0	Roy et al. ACS Omega. 2019; 4(16):16774-16780. DOI: 10.1021/acsomega.9b01512
885	O(C)C12[C@@H]3Oc4c(O)ccc5c4[C@@]43C([C@H](N(CC3CC3)CC4)C5)(C1)C2.O[C@](C(C)(C)C)(C=C)C	NA	1	Roy et al. ACS Omega. 2019; 4(16):16774-16780. DOI: 10.1021/acsomega.9b01512
886	O(C)[C-]1C(CC)=C(C)N2C(=[N+H]1)NC(c1nc(C)on1)=C2	NA	1	Roy et al. ACS Omega. 2019; 4(16):16774-16780. DOI: 10.1021/acsomega.9b01512
887	O(C)[C-]1[N+H]=C2N(C3=C1CCCC3)C=C(c1nc(C)on1)N2	NA	1	Roy et al. ACS Omega. 2019; 4(16):16774-16780. DOI: 10.1021/acsomega.9b01512
888	O(C)[C@H]1[C@H](O[C@H]2O[C@@H](C)[C@H](O)[C@@H](OC)C2)[C@@H](C)O[C@@H](O[C@@H]/2[C@H](C)/C=C/C=C\3/[C@]4(O)[C@H]([C@H](O)C(C)=C[C@H]4C(=O)O[C@@H]4C[C@]5(O[C@H](C(C)C)[C@@H](C)CC5)O[C@@H](C4)C/C=C\2/C)OC/3)C1	NA	0	Roy et al. ACS Omega. 2019; 4(16):16774-16780. DOI: 10.1021/acsomega.9b01512
889	O(C)[C@H]1[C@H](O)[C@H](C)O[C@@H](O[C@@H]2[C@H](C)[C@@H](O[C@H]3[C@@H](O)[C@H](N(C)C)C[C@@H](C)O3)[C@@H](C)C[C@@]3(C(=O)[C@@H](C)[C@@H](O)[C@H](C)[C@@H](C)OC(=O)[C@@H]2C)OC3)C1	NA	0	Roy et al. ACS Omega. 2019; 4(16):16774-16780. DOI: 10.1021/acsomega.9b01512
890	O(C)[C@H]1[C@@]2(OC)[C@H]3[C@@](O)(CCC)c4c(O)ccc5c4[C@@]41[C@@]([C@H](N(CC=C)CC4)C5)(C=C2)C3	NA	1	Roy et al. ACS Omega. 2019; 4(16):16774-16780. DOI: 10.1021/acsomega.9b01512
891	O(C)[C@]12[C@H]([C@](O)(CCC)C)C[C@@]3([C@H]4N(C)CC[C@]53[C@@H]1Oc1c(O)ccc(c51)C4)C=C2	NA	1	Roy et al. ACS Omega. 2019; 4(16):16774-16780. DOI: 10.1021/acsomega.9b01512
892	O(C)[C@@H]1O[C@@H]2[C@@H](C)[C@@H]3[C@H]1[C@@](CN1CCCCC1)([C@@H](O)C3)O2	NA	1	Roy et al. ACS Omega. 2019; 4(16):16774-16780. DOI: 10.1021/acsomega.9b01512
893	O(C)[C@@H]1[C@@H](O)CC[C@H](/C=C(\C)/[C@@H]2[C@@H](C)[C@H](O)CC(=O)[C@H](CC=C)/C=C(/C)\C[C@@H](C)C[C@H](OC)[C@H]3[C@@H](OC)C[C@@H](C)[C@@](O)(C(=O)C(=O)N4[C@@H](C(=O)O2)CCCC4)O3)C1	NA	0	Roy et al. ACS Omega. 2019; 4(16):16774-16780. DOI: 10.1021/acsomega.9b01512
894	O(C)[C@@]12[C@@H](C(O)(C)C)C[C@]3([C@@H]4N(CC5CC5)CC[C@@]53[C@H]1Oc1c(O)ccc(c51)C4)C=C2	101606270	1	Roy et al. ACS Omega. 2019; 4(16):16774-16780. DOI: 10.1021/acsomega.9b01512
895	O(C(CO)CO)CN1[C@H]2N[C@@H](N)N[C@H](O)[C@H]2NC1	NA	1	Roy et al. ACS Omega. 2019; 4(16):16774-16780. DOI: 10.1021/acsomega.9b01512
896	O(C(c1ccccc1)c1ccccc1)C1C[C@@H]2N(C)[C@H](C1)CC2	1201549	1	Roy et al. ACS Omega. 2019; 4(16):16774-16780. DOI: 10.1021/acsomega.9b01512
897	O(C(C)C)CC(OCn1c2NC(N)=NCc2nc1)COC(C)C	511883	1	Roy et al. ACS Omega. 2019; 4(16):16774-16780. DOI: 10.1021/acsomega.9b01512
898	O([C@H]1[C@H](O)[C@H](O[C@H]2[C@@H](O)[C@H](NC)[C@@](O)(C)CO2)[C@H](N)C[C@H]1N)[C@H]1[C@@H](N)CC=C(CN)O1	NA	0	Roy et al. ACS Omega. 2019; 4(16):16774-16780. DOI: 10.1021/acsomega.9b01512
899	O([C@H]1[C@H](O)[C@H](O)[C@@H](N)C[C@H]1N)[C@H]1[C@H](N)C[C@H]2O[C@@H](O[C@@H]3[C@H](O)[C@@H](O)[C@H](N)[C@H](CO)O3)[C@@H](NC)[C@H](O)[C@H]2O1	NA	0	Roy et al. ACS Omega. 2019; 4(16):16774-16780. DOI: 10.1021/acsomega.9b01512
900	O([C@H]1[C@H](O)[C@@H](O[C@H]2[C@H](N)CC[C@H](CN)O2)[C@@H](N)C[C@@H]1N)[C@@H]1[C@@H](O)[C@@H](N)[C@H](O)[C@@H](CO)O1	NA	0	Roy et al. ACS Omega. 2019; 4(16):16774-16780. DOI: 10.1021/acsomega.9b01512
901	O([C@H]1[C@H](C)O[C@H](O[C@@H]2c3c(O)c4C(=O)c5c(O)cccc5C(=O)c4c(O)c3[C@@H](O[C@@H]3O[C@@H](C)[C@H](O)[C@@H](N(C)C)C3)[C@](O)(CC)C2)C[C@@H]1N(C)C)[C@@H]1O[C@H](C)[C@H]2O[C@@H]3O[C@H](C)C(=O)C[C@@H]3O[C@@H]2C1	NA	0	Roy et al. ACS Omega. 2019; 4(16):16774-16780. DOI: 10.1021/acsomega.9b01512
902	O([C@H]1[C@H](C)[C@@H](O[C@@H]2O[C@@H](C)[C@H](O)[C@@](OC)(C)C2)[C@H](C)C(=O)O[C@H](CC)[C@@](O)(C)[C@H](O)[C@@H](C)C(=O)[C@@H](C)C[C@]1(OC)C)[C@@H]1[C@@H](O)[C@@H](N(C)C)C[C@@H](C)O1	NA	0	Roy et al. ACS Omega. 2019; 4(16):16774-16780. DOI: 10.1021/acsomega.9b01512
903	O([C@H]1[C@H](C)[C@@H](O[C@@H]2O[C@@H](C)[C@H](O)[C@@](OC)(C)C2)[C@H](C)C(=O)O[C@H](CC)[C@@](O)(C)[C@H](O)[C@@H](C)C(=O)[C@@H](C)C[C@@]1(O)C)[C@@H]1[C@@H](O)[C@H](N(C)C)C[C@H](C)O1	NA	0	Roy et al. ACS Omega. 2019; 4(16):16774-16780. DOI: 10.1021/acsomega.9b01512
904	O([C@H]1[C@@H](C)[C@@H](O[C@@H]2O[C@H](C)[C@@H](O)[C@](OC)(C)C2)[C@@H](C)C(=O)O[C@@H](CC)[C@H](C)[C@@H](O)[C@H](C)C(=O)[C@@H](C)C[C@]1(O)C)[C@@H]1[C@@H](O)[C@H](N(C)C)C[C@@H](C)O1	NA	0	Roy et al. ACS Omega. 2019; 4(16):16774-16780. DOI: 10.1021/acsomega.9b01512
905	O([C@H](OC(=O)C1=C(COC(=O)N)CS[C@H]2[C@H](NC(=O)/C(=N/OC)/c3occc3)C(=O)N12)C)C(=O)C(OC)(C)C	NA	0	Roy et al. ACS Omega. 2019; 4(16):16774-16780. DOI: 10.1021/acsomega.9b01512
906	O([C@H](COCCCC)CN1C(=O)[C@@](CC)(c2ccccc2)C(=O)NC1=O)C(=O)N	10069846	1	Roy et al. ACS Omega. 2019; 4(16):16774-16780. DOI: 10.1021/acsomega.9b01512
907	O([C@H](c1c(C)cccc1)c1ccccc1)CCNC	36690649	1	Roy et al. ACS Omega. 2019; 4(16):16774-16780. DOI: 10.1021/acsomega.9b01512
908	O([C@H](c1c(C)cccc1)c1ccccc1)CCN(C)C	736041	0	Roy et al. ACS Omega. 2019; 4(16):16774-16780. DOI: 10.1021/acsomega.9b01512
909	O([C@H](C(=O)N[C@@H]1C(=O)N2[C@H](C(=O)O)C(C)(C)S[C@H]12)CC(C)C)C(=O)c1occc1	NA	0	Roy et al. ACS Omega. 2019; 4(16):16774-16780. DOI: 10.1021/acsomega.9b01512
910	O([C@H](C([C@@H](OC(=O)N)C)C)C)C(=O)N	124303682	1	Roy et al. ACS Omega. 2019; 4(16):16774-16780. DOI: 10.1021/acsomega.9b01512
911	O([C@H](C#C)c1ccccc1)C(=O)N	76971838	1	Roy et al. ACS Omega. 2019; 4(16):16774-16780. DOI: 10.1021/acsomega.9b01512
912	O([C@H]([C@H]1NCCCC1)c1ccccc1)C(=O)C	65715	1	Roy et al. ACS Omega. 2019; 4(16):16774-16780. DOI: 10.1021/acsomega.9b01512
913	O([C@H]([C@@H]1OCCNC1)c1ccccc1)c1c(OCC)cccc1	5311403	1	Roy et al. ACS Omega. 2019; 4(16):16774-16780. DOI: 10.1021/acsomega.9b01512
914	O([C@H](/C(=N/O)/N)C)c1c2c(ccc1)cccc2	129360240	1	Roy et al. ACS Omega. 2019; 4(16):16774-16780. DOI: 10.1021/acsomega.9b01512
915	O([C@](C)(c1ncccc1)c1ccccc1)CCN(C)C	25271652	1	Roy et al. ACS Omega. 2019; 4(16):16774-16780. DOI: 10.1021/acsomega.9b01512
916	O([C@@H]1[C@H](O)[C@H](O[C@H]2[C@@H](O)[C@H](NC)[C@@](O)(C)CO2)[C@H](NCC)C[C@H]1N)[C@@H]1[C@H](N)CC=C(CN)O1	NA	0	Roy et al. ACS Omega. 2019; 4(16):16774-16780. DOI: 10.1021/acsomega.9b01512
917	O([C@@H]1[C@H](O)[C@@H](O[C@@H]2[C@@H](N)C[C@H](O)[C@@H](CN)O2)[C@@H](N)C[C@@H]1N)[C@@H]1[C@@H](O)[C@H](N)[C@@H](O)[C@@H](CO)O1	NA	0	Roy et al. ACS Omega. 2019; 4(16):16774-16780. DOI: 10.1021/acsomega.9b01512
918	O([C@@H]1[C@H](O)[C@@H](O)[C@H]2O[C@@H](C)OC[C@@H]2O1)[C@H]1[C@H]2[C@H]([C@H](c3cc(OC)c(O)c(OC)c3)c3c1cc1OCOc1c3)C(=O)OC2	NA	0	Roy et al. ACS Omega. 2019; 4(16):16774-16780. DOI: 10.1021/acsomega.9b01512
919	O([C@@H]1[C@H](O)[C@@H](O)[C@H](N[C-]([N+H3])N)[C@@H](O)[C@@H]1N[C-]([N+H3])N)[C@@H]1[C@H](O[C@@H]2[C@@H](NC)[C@H](O)[C@@H](O)[C@H](CO)O2)[C@@](O)(CO)[C@@H](C)O1	NA	0	Roy et al. ACS Omega. 2019; 4(16):16774-16780. DOI: 10.1021/acsomega.9b01512
920	O([C@@H]1[C@H](O)[C@@H](O)[C@@H]2O[C@@H](c3sccc3)OC[C@@H]2O1)[C@@H]1[C@H]2[C@H]([C@@H](c3cc(OC)c(OC)c(OC)c3)c3c1cc1OCOc1c3)C(=O)OC2	NA	0	Roy et al. ACS Omega. 2019; 4(16):16774-16780. DOI: 10.1021/acsomega.9b01512
921	O([C@@H]1[C@H](C)O[C@@H](O[C@@H]2C[C@H]3[C@](C)([C@@H]4[C@H]([C@@]5(O)[C@@](C)([C@@H](O)C4)[C@@H](C4=CC(=O)OC4)CC5)CC3)CC2)C[C@H]1O)[C@H]1O[C@@H](C)[C@H](O[C@H]2O[C@@H](C)[C@H](O)[C@@H](O)C2)[C@@H](O)C1	NA	0	Roy et al. ACS Omega. 2019; 4(16):16774-16780. DOI: 10.1021/acsomega.9b01512
922	O([C@@H]1[C@H](C)[C@@H](O[C@@H]2O[C@H](C)[C@H](O)[C@@](OC)(C)C2)[C@H](C)C(=O)O[C@H](CC)[C@@](O)(C)[C@H](O)[C@@H](C)N(C)C[C@H](C)C[C@]1(O)C)[C@@H]1[C@H](O)[C@@H](N(C)C)C[C@H](C)O1	NA	0	Roy et al. ACS Omega. 2019; 4(16):16774-16780. DOI: 10.1021/acsomega.9b01512
923	O([C@@H]1[C@@H](O[C@H]2[C@H](N)[C@@H](O)[C@H](O)[C@@H](CN)O2)[C@H](N)C[C@H](N)[C@H]1O)[C@@H]1[C@@H](O)[C@H](O[C@H]2[C@@H](N)[C@H](O)[C@@H](O)[C@@H](CN)O2)[C@@H](CO)O1	NA	0	Roy et al. ACS Omega. 2019; 4(16):16774-16780. DOI: 10.1021/acsomega.9b01512
924	O([C@@H]1[C@@H](O)CNCC1)c1c(C)c(C)ccc1	54546991	1	Roy et al. ACS Omega. 2019; 4(16):16774-16780. DOI: 10.1021/acsomega.9b01512
925	O([C@@H]1[C@@H](O)[C@H](O[C@H]2[C@H](N)[C@@H](O)[C@H](O)[C@H](CN)O2)[C@@H](N)C[C@H]1NC(CO)CO)[C@H]1[C@@H](O)[C@H](N)[C@@H](O)[C@H](CO)O1	NA	0	Roy et al. ACS Omega. 2019; 4(16):16774-16780. DOI: 10.1021/acsomega.9b01512
926	O([C@@H]1[C@@H](O)[C@H](O[C@H]2[C@@H](O)[C@H](NC)[C@@](O)(C)CO2)[C@@H](N)C[C@H]1N)[C@H]1[C@@H](N)CC[C@H](CN)O1	12799065	0	Roy et al. ACS Omega. 2019; 4(16):16774-16780. DOI: 10.1021/acsomega.9b01512
927	O([C@@H]1[C@@H](O)[C@H](O[C@H]2[C@@H](O)[C@@H](O)[C@@H](O)[C@H](CN)O2)[C@@H](N)C[C@H]1NC[C@@H](O)CCN)[C@@H]1[C@@H](O)[C@H](N)[C@@H](O)[C@H](CO)O1	NA	0	Roy et al. ACS Omega. 2019; 4(16):16774-16780. DOI: 10.1021/acsomega.9b01512
928	O([C@@H]1[C@@H](O)[C@H](O[C@@H]2[C@H](N)[C@@H](O)[C@H](O)[C@@H](CN)O2)[C@@H](N)C[C@H]1N)[C@@H]1[C@H](O)[C@@H](N)[C@H](O)[C@H](CO)O1	NA	0	Roy et al. ACS Omega. 2019; 4(16):16774-16780. DOI: 10.1021/acsomega.9b01512
929	O([C@@H]1[C@@H](O)[C@H](O[C@@H]2[C@@H](O)[C@@H](N)[C@H](O)[C@@H](CO)O2)[C@@H](N)C[C@@H]1N)[C@@H]1[C@H](O)[C@H](O)[C@H](O)[C@H](CN)O1	NA	0	Roy et al. ACS Omega. 2019; 4(16):16774-16780. DOI: 10.1021/acsomega.9b01512
930	O([C@@H]1[C@@H](O)[C@H](O)[C@H]2O[C@@H](c3sccc3)OC[C@@H]2O1)[C@@H]1[C@@H]2[C@@H]([C@@H](c3cc(OC)c(O)c(O)c3)c3c1cc1OCOc1c3)C(=O)OC2	NA	1	Roy et al. ACS Omega. 2019; 4(16):16774-16780. DOI: 10.1021/acsomega.9b01512
931	O([C@@H]1[C@@H](O)[C@H](O)[C@@H](O)[C@H](CO)O1)c1c(CO)cccc1	667502	1	Roy et al. ACS Omega. 2019; 4(16):16774-16780. DOI: 10.1021/acsomega.9b01512
932	O([C@@H]1[C@@H](O)[C@@H](O)[C@@H](N)C[C@H]1N)[C@H]1[C@@H](N)[C@H](O)[C@@H](O)[C@H](CN)O1	NA	0	Roy et al. ACS Omega. 2019; 4(16):16774-16780. DOI: 10.1021/acsomega.9b01512
933	O([C@@H](OC(=O)C1=C(COC(=O)N)CS[C@H]2[C@H](NC(=O)/C(=N/OC)/c3occc3)C(=O)N12)C)C(=O)C	92402347	0	Roy et al. ACS Omega. 2019; 4(16):16774-16780. DOI: 10.1021/acsomega.9b01512
934	O([C@@H](OC(=O)[C@@H]1C(C)(C)S[C@H]2[C@@H](/N=C/N3CCCCCC3)C(=O)N12)C)C(=O)OCC	NA	0	Roy et al. ACS Omega. 2019; 4(16):16774-16780. DOI: 10.1021/acsomega.9b01512
935	O([C@@H](COCCCC)CN1C(=O)N(C[C@@H](OC(=O)N)COCCCC)C(=O)C(CC)(c2ccccc2)C1=O)C(=O)N	76959543	1	Roy et al. ACS Omega. 2019; 4(16):16774-16780. DOI: 10.1021/acsomega.9b01512
936	O([C@@H](CN1CCCC1)c1ccccc1)CCC(C)C	76962710	1	Roy et al. ACS Omega. 2019; 4(16):16774-16780. DOI: 10.1021/acsomega.9b01512
937	O([C@@H](CCNC)c1sccc1)c1c2c(ccc1)cccc2	60835	1	Roy et al. ACS Omega. 2019; 4(16):16774-16780. DOI: 10.1021/acsomega.9b01512
938	O([C@@H](CCNC)c1ccccc1)c1c(OC)cccc1	6603938	1	Roy et al. ACS Omega. 2019; 4(16):16774-16780. DOI: 10.1021/acsomega.9b01512
939	O([C@@H](CCNC)c1ccccc1)c1c(C)cccc1	6093336	1	Roy et al. ACS Omega. 2019; 4(16):16774-16780. DOI: 10.1021/acsomega.9b01512
940	O([C@@H](CC)C1CCCCC1)C(=O)N	76959639	1	Roy et al. ACS Omega. 2019; 4(16):16774-16780. DOI: 10.1021/acsomega.9b01512
941	O([C@@H](c1c(C(C)(C)C)cccc1)c1ccccc1)CCN(C)C	76956420	1	Roy et al. ACS Omega. 2019; 4(16):16774-16780. DOI: 10.1021/acsomega.9b01512
942	O([C@@H](C(C[C@H](N(C)C)C)(c1ccccc1)c1ccccc1)CC)C(=O)C	22308	1	Roy et al. ACS Omega. 2019; 4(16):16774-16780. DOI: 10.1021/acsomega.9b01512
943	O(/N=C/C1=CCCN(C)C1)C	6435812	1	Roy et al. ACS Omega. 2019; 4(16):16774-16780. DOI: 10.1021/acsomega.9b01512
944	O(/N=C/1\[C@H](C)[C@@H](O)[C@](O)(C)[C@@H](CC)OC(=O)[C@@H](C)[C@H](O[C@@H]2O[C@@H](C)[C@H](O)[C@@](OC)(C)C2)[C@@H](C)[C@H](O[C@@H]2[C@@H](O)[C@H](N(C)C)C[C@H](C)O2)[C@](O)(C)C[C@@H]\1C)COCCOC	NA	0	Roy et al. ACS Omega. 2019; 4(16):16774-16780. DOI: 10.1021/acsomega.9b01512
945	O(/N=C/1\[C@@H](C)[C@H](O)[C@@](O)(C)[C@H](CC)OC(=O)[C@H](C)[C@@H](O[C@H]2O[C@H](C)[C@@H](O)[C@](OC)(C)C2)[C@H](C)[C@@H](O[C@H]2[C@H](O)[C@@H](N(C)C)C[C@@H](C)O2)[C@@](O)(C)C[C@H]\1C)C	NA	0	Roy et al. ACS Omega. 2019; 4(16):16774-16780. DOI: 10.1021/acsomega.9b01512
946	O(/N=C(\CCCCC)/c1cc(N)c(C)cc1)CCN	9578268	1	Roy et al. ACS Omega. 2019; 4(16):16774-16780. DOI: 10.1021/acsomega.9b01512
947	O(/N=C(\C#N)/[C@H]1C2CCN(C1)CC2)C	NA	1	Roy et al. ACS Omega. 2019; 4(16):16774-16780. DOI: 10.1021/acsomega.9b01512
948	O(/N=C(/C(=O)N[C@H]1C(=O)N2C(C(=O)O)=C(CN3C=CCC=C3)CS[C@H]12)\c1nc(N)sc1)C(C(=O)O)(C)C	NA	0	Roy et al. ACS Omega. 2019; 4(16):16774-16780. DOI: 10.1021/acsomega.9b01512
949	NS(=O)(=O)Cc1noc2ccccc12	5734	1	Zhao et al. J Chem Inf Model. 2007;47(1):170–175. DOI:10.1021/ci600312d
950	NS(=O)(=O)c3ccc(N1C(=O)CC(C1=O)c2ccccc2)c(Cl)c3	72094	1	Zhao et al. J Chem Inf Model. 2007;47(1):170–175. DOI:10.1021/ci600312d
951	NS(=O)(=O)c2cc1c(NCNS1(=O)=O)cc2Cl	3639	0	Zhao et al. J Chem Inf Model. 2007;47(1):170–175. DOI:10.1021/ci600312d
952	NS(=O)(=O)c2cc1c(N=CNS1(=O)=O)cc2Cl	2720	0	Zhao et al. J Chem Inf Model. 2007;47(1):170–175. DOI:10.1021/ci600312d
953	NS(=O)(=O)c2cc(C(O)=O)c(NCc1ccco1)cc2Cl	3440	0	Zhao et al. J Chem Inf Model. 2007;47(1):170–175. DOI:10.1021/ci600312d
954	NS(=O)(=O)c1ccc(cc1)N1CCCCS1(=O)=O	5356	1	Zhao et al. J Chem Inf Model. 2007;47(1):170–175. DOI:10.1021/ci600312d
955	NS(=O)(=O)c1ccc(cc1)C(O)=O	8739	1	Zhao et al. J Chem Inf Model. 2007;47(1):170–175. DOI:10.1021/ci600312d
956	NNCCc1ccccc1	3675	1	Zhao et al. J Chem Inf Model. 2007;47(1):170–175. DOI:10.1021/ci600312d
957	NNCC1CCCCC1	71824	1	Zhao et al. J Chem Inf Model. 2007;47(1):170–175. DOI:10.1021/ci600312d
958	NNC(=O)CP(=O)(c1ccccc1)c2ccccc2	27918	1	Zhao et al. J Chem Inf Model. 2007;47(1):170–175. DOI:10.1021/ci600312d
959	NNC(=O)c1ccncc1	3767	1	Zhao et al. J Chem Inf Model. 2007;47(1):170–175. DOI:10.1021/ci600312d
960	NCN.Nc1scc(-c2ccccc2)n1	NA	1	Roy et al. ACS Omega. 2019; 4(16):16774-16780. DOI: 10.1021/acsomega.9b01512
961	NCN.Nc1scc(-c2cc(N)ccc2)n1	NA	0	Roy et al. ACS Omega. 2019; 4(16):16774-16780. DOI: 10.1021/acsomega.9b01512
962	NCCCNCCSP(O)(O)=O	2141	0	Zhao et al. J Chem Inf Model. 2007;47(1):170–175. DOI:10.1021/ci600312d
963	NCCc1cn2c(n1)cccc2	7536516	0	Zhao et al. J Chem Inf Model. 2007;47(1):170–175. DOI:10.1021/ci600312d
964	NCCc1ccc(O)c(O)c1	681	0	Zhao et al. J Chem Inf Model. 2007;47(1):170–175. DOI:10.1021/ci600312d
965	NCCC(Oc1ccc(cc1)C(F)(F)F)c2ccccc2	4541	1	Zhao et al. J Chem Inf Model. 2007;47(1):170–175. DOI:10.1021/ci600312d
966	NCCC(O)CNC2CC(N)C(OC1OC(CN)C(O)C(O)C1O)C(O)C2OC3OC(CO)C(O)C(N)C3O	65487	0	Zhao et al. J Chem Inf Model. 2007;47(1):170–175. DOI:10.1021/ci600312d
967	NCCC(O)C(=O)NC2CC(N)C(OC1OC(CN)CCC1N)C(O)C2OC3OC(CO)C(O)C(N)C3O	2226	0	Zhao et al. J Chem Inf Model. 2007;47(1):170–175. DOI:10.1021/ci600312d
968	NCCC(O)C(=O)NC2CC(N)C(OC1OC(CN)C(O)C(O)C1O)C(O)C2OC3OC(CO)C(O)C(N)C3O	2142	0	Zhao et al. J Chem Inf Model. 2007;47(1):170–175. DOI:10.1021/ci600312d
969	NCC4OC(OC3C(CO)OC(OC1C(O)C(N)CC(N)C1OC2OC(CN)C(O)C(O)C2N)C3O)C(N)C(O)C4O	4454	0	Zhao et al. J Chem Inf Model. 2007;47(1):170–175. DOI:10.1021/ci600312d
970	NCC3OC(OC2C(N)CC(NC(CO)CO)C(OC1OC(CO)C(O)C(N)C1O)C2O)C(N)C(O)C3O	68557	0	Zhao et al. J Chem Inf Model. 2007;47(1):170–175. DOI:10.1021/ci600312d
971	NCC3OC(OC2C(N)CC(N)C(OC1OC(CO)C(O)C(N)C1O)C2O)C(O)C(O)C3O	815	0	Zhao et al. J Chem Inf Model. 2007;47(1):170–175. DOI:10.1021/ci600312d
972	NCC3OC(OC2C(N)CC(N)C(OC1OC(CO)C(O)C(N)C1O)C2O)C(N)CC3O	5496	0	Zhao et al. J Chem Inf Model. 2007;47(1):170–175. DOI:10.1021/ci600312d
973	NCC3OC(OC2C(N)CC(N)C(OC1OC(CO)C(O)C(N)C1O)C2O)C(N)C(O)C3O	816	0	Zhao et al. J Chem Inf Model. 2007;47(1):170–175. DOI:10.1021/ci600312d
974	NCC2OC(OC1C(N)CC(N)C(O)C1O)C(N)C(O)C2O	413349	0	Zhao et al. J Chem Inf Model. 2007;47(1):170–175. DOI:10.1021/ci600312d
975	NCC2CN(Cc1ccccc1)C(=O)C2	65926	1	Zhao et al. J Chem Inf Model. 2007;47(1):170–175. DOI:10.1021/ci600312d
976	NCc1ccccc1Sc2ccccc2CO	43961	1	Zhao et al. J Chem Inf Model. 2007;47(1):170–175. DOI:10.1021/ci600312d
977	NCc1ccccc1CC(=O)NC3C2SCC(=C(N2C3=O)C(O)=O)CSc4nnnn4CC(O)=O	5229712	0	Zhao et al. J Chem Inf Model. 2007;47(1):170–175. DOI:10.1021/ci600312d
978	NCC1CCC(N)C(O1)OC3C(N)CC(N)C(OC2OC(CO)C(O)C(N)C2O)C3O	3021	0	Zhao et al. J Chem Inf Model. 2007;47(1):170–175. DOI:10.1021/ci600312d
979	NCC1(CCCCC1)CC(O)=O	3446	1	Zhao et al. J Chem Inf Model. 2007;47(1):170–175. DOI:10.1021/ci600312d
980	NCC[C@@](O)([H])CN[C@@]2([H])C[C@@](N)([H])[C@@]([H])(O[C@@]1([H])O[C@@]([H])(CN)[C@@](O)([H])[C@@](O)([H])[C@@]1(O)[H])[C@@](O)([H])[C@@]2([H])O[C@@]3([H])O[C@@]([H])(CO)[C@@](O)([H])[C@@](N)([H])[C@@]3(O)[H]	11954318	0	Shen et al. J Chem Inf Model. 2010;50(6):1034-1041. DOI: 10.1021/ci100104j
981	NCC[C@@](O)([H])C(=O)N[C@@]2([H])C[C@@](N)([H])[C@@]([H])(O[C@@]1([H])O[C@@]([H])(CN)CC[C@@]1(N)[H])[C@@](O)([H])[C@@]2([H])O[C@@]3([H])O[C@@]([H])(CO)[C@@](O)([H])[C@@](N)([H])[C@@]3(O)[H]	68682	0	Shen et al. J Chem Inf Model. 2010;50(6):1034-1041. DOI: 10.1021/ci100104j
982	NCC[C@@](O)([H])C(=O)N[C@@]2([H])C[C@@](N)([H])[C@@]([H])(O[C@@]1([H])O[C@@]([H])(CN)[C@@](O)([H])[C@@](O)([H])[C@@]1(O)[H])[C@@](O)([H])[C@@]2([H])O[C@@]3([H])O[C@@]([H])(CO)[C@@](O)([H])[C@@](N)([H])[C@@]3(O)[H]	37768	0	Shen et al. J Chem Inf Model. 2010;50(6):1034-1041. DOI: 10.1021/ci100104j
983	NCC[C@@]([H])(O/C1=C/C=C(C=C1)C([F])([F])[F])C2=CC=CC=C2	3058751	1	Shen et al. J Chem Inf Model. 2010;50(6):1034-1041. DOI: 10.1021/ci100104j
984	NCC(O)c1cccc(O)c1	4538	0	Zhao et al. J Chem Inf Model. 2007;47(1):170–175. DOI:10.1021/ci600312d
985	NCC(O)c1ccc(O)c(O)c1	951	0	Zhao et al. J Chem Inf Model. 2007;47(1):170–175. DOI:10.1021/ci600312d
986	NCC(CCc1ccc(F)cc1)=CF	114903	1	Zhao et al. J Chem Inf Model. 2007;47(1):170–175. DOI:10.1021/ci600312d
987	NCC(CC/C1=C/C=C(/[F])C=C1)=C[F]	6437850	1	Shen et al. J Chem Inf Model. 2010;50(6):1034-1041. DOI: 10.1021/ci100104j
988	Nc4nc(NC1CC1)c3ncn(C2CC(CO)C=C2)c3n4	1971	1	Zhao et al. J Chem Inf Model. 2007;47(1):170–175. DOI:10.1021/ci600312d
989	Nc3nc(=O)c2nc(CNc1ccc(cc1)C(=O)NC(CCC(O)=O)C(O)=O)cnc2[nH]3	135444779	1	Zhao et al. J Chem Inf Model. 2007;47(1):170–175. DOI:10.1021/ci600312d
990	Nc2ncc1ncn(COCCO)c1n2	55256	1	Zhao et al. J Chem Inf Model. 2007;47(1):170–175. DOI:10.1021/ci600312d
991	Nc2nc1n(COC(CO)CO)cnc1c(=O)[nH]2	135398740	1	Zhao et al. J Chem Inf Model. 2007;47(1):170–175. DOI:10.1021/ci600312d
992	Nc2nc1n(CCC(O)CO)cnc1c(=O)[nH]2	135415612	1	Zhao et al. J Chem Inf Model. 2007;47(1):170–175. DOI:10.1021/ci600312d
993	Nc2nc1n(CCC(CO)CO)cnc1c(=O)[nH]2	135398748	1	Zhao et al. J Chem Inf Model. 2007;47(1):170–175. DOI:10.1021/ci600312d
994	Nc2nc1ccc(OC(F)(F)F)cc1s2	5070	1	Zhao et al. J Chem Inf Model. 2007;47(1):170–175. DOI:10.1021/ci600312d
995	Nc2ccn(C1OC(CO)C(O)C1O)c(=O)n2	596	1	Zhao et al. J Chem Inf Model. 2007;47(1):170–175. DOI:10.1021/ci600312d
996	Nc2ccn(C1CCC(CO)O1)c(=O)n2	5718	1	Zhao et al. J Chem Inf Model. 2007;47(1):170–175. DOI:10.1021/ci600312d
997	Nc2ccc(N=Nc1ccccc1)c(N)n2	4756	0	Zhao et al. J Chem Inf Model. 2007;47(1):170–175. DOI:10.1021/ci600312d
998	Nc2cc(OCC1CC1)c(cc2Cl)C(=O)NC3CN4CCC3CC4	71342	1	Zhao et al. J Chem Inf Model. 2007;47(1):170–175. DOI:10.1021/ci600312d
999	Nc2c1CCCCc1nc3ccccc23	1935	1	Zhao et al. J Chem Inf Model. 2007;47(1):170–175. DOI:10.1021/ci600312d
1000	Nc2c1C(O)CCCc1nc3ccccc23	3655	1	Zhao et al. J Chem Inf Model. 2007;47(1):170–175. DOI:10.1021/ci600312d
1001	NC23CC1CC(CC(C1)C2)C3	2130	1	Zhao et al. J Chem Inf Model. 2007;47(1):170–175. DOI:10.1021/ci600312d
1002	Nc1nnc(c(N)n1)c2cccc(Cl)c2Cl	3878	1	Zhao et al. J Chem Inf Model. 2007;47(1):170–175. DOI:10.1021/ci600312d
1003	Nc1ncnc2n(cnc12)C3OC(CO)C(O)C3O	191	1	Zhao et al. J Chem Inf Model. 2007;47(1):170–175. DOI:10.1021/ci600312d
1004	Nc1nc(cs1)C(=NOCC(O)=O)C(=O)NC3C2SCC(=C(N2C3=O)C(O)=O)C=C	2675	0	Zhao et al. J Chem Inf Model. 2007;47(1):170–175. DOI:10.1021/ci600312d
1005	Nc1nc(cs1)C(=NO)C(=O)NC3C2SCC(=C(N2C3=O)C(O)=O)C=C	6803597	0	Zhao et al. J Chem Inf Model. 2007;47(1):170–175. DOI:10.1021/ci600312d
1006	Nc1nc(cs1)C(=CCC(O)=O)C(=O)NC3C2SCC=C(N2C3=O)C(O)=O	2654	0	Zhao et al. J Chem Inf Model. 2007;47(1):170–175. DOI:10.1021/ci600312d
1007	Nc1nc(Cl)nc2n(cnc12)C3CC(O)C(CO)O3	1546	1	Zhao et al. J Chem Inf Model. 2007;47(1):170–175. DOI:10.1021/ci600312d
1008	Nc1nc(=O)[nH]cc1F	3366	1	Zhao et al. J Chem Inf Model. 2007;47(1):170–175. DOI:10.1021/ci600312d
1009	NC1CONC1=O	401	1	Zhao et al. J Chem Inf Model. 2007;47(1):170–175. DOI:10.1021/ci600312d
1010	NC1CCCC1c2ccccc2	21786	1	Zhao et al. J Chem Inf Model. 2007;47(1):170–175. DOI:10.1021/ci600312d
1011	Nc1cccc(c1)n2ccccc2=O	8641	1	Zhao et al. J Chem Inf Model. 2007;47(1):170–175. DOI:10.1021/ci600312d
1012	Nc1ccc(cc1)S(=O)(=O)Nc2ncccn2	5215	1	Zhao et al. J Chem Inf Model. 2007;47(1):170–175. DOI:10.1021/ci600312d
1013	Nc1ccc(cc1)S(=O)(=O)N3CC2CCC(CC2)C3	14380	1	Zhao et al. J Chem Inf Model. 2007;47(1):170–175. DOI:10.1021/ci600312d
1014	Nc1ccc(cc1)S(=O)(=O)c2ccc(N)cc2	2955	1	Zhao et al. J Chem Inf Model. 2007;47(1):170–175. DOI:10.1021/ci600312d
1015	Nc1ccc(C(O)=O)c(O)c1	4649	0	Zhao et al. J Chem Inf Model. 2007;47(1):170–175. DOI:10.1021/ci600312d
1016	NC1CC1c2ccccc2	5530	1	Zhao et al. J Chem Inf Model. 2007;47(1):170–175. DOI:10.1021/ci600312d
1017	Nc1cc(Cl)ccc1N2CCSC2=N	3063289	1	Zhao et al. J Chem Inf Model. 2007;47(1):170–175. DOI:10.1021/ci600312d
1018	NC1C2CN(CC12)c4nc3n(cc(C(O)=O)c(=O)c3cc4F)c5ccc(F)cc5F	481696	1	Zhao et al. J Chem Inf Model. 2007;47(1):170–175. DOI:10.1021/ci600312d
1019	Nc1c2c([C@@H](c3ccccc3)CN(C)C2)ccc1	12884652	1	Roy et al. ACS Omega. 2019; 4(16):16774-16780. DOI: 10.1021/acsomega.9b01512
1020	NC12C[C@]3(C)C[C@](C)(C1)CC(C2)C3	1263681	1	Roy et al. ACS Omega. 2019; 4(16):16774-16780. DOI: 10.1021/acsomega.9b01512
1021	NC1=Nc2n(cnc2C(=O)N1)COCCO	135398513	1	Zhao et al. J Chem Inf Model. 2007;47(1):170–175. DOI:10.1021/ci600312d
1022	NC1=NC(NC1(C(F)(F)F)C(F)(F)F)(C(F)(F)F)C(F)(F)F	32068	1	Zhao et al. J Chem Inf Model. 2007;47(1):170–175. DOI:10.1021/ci600312d
1023	NC1=NC(=O)C(O1)c2ccccc2	4723	1	Zhao et al. J Chem Inf Model. 2007;47(1):170–175. DOI:10.1021/ci600312d
1024	NC=1C=CN(C(=O)N=1)[C@@]2([H])O[C@@]([H])(CO)[C@@](O)([H])[C@@]2(O)[H]	6253	1	Shen et al. J Chem Inf Model. 2010;50(6):1034-1041. DOI: 10.1021/ci100104j
1025	NC=1C=CN(C(=O)N=1)[C@@]2([H])CC[C@@]([H])(CO)O2	24066	1	Shen et al. J Chem Inf Model. 2010;50(6):1034-1041. DOI: 10.1021/ci100104j
1026	NC[C@@]4([H])O[C@@]([H])(O[C@@]3([H])[C@@]([H])(CO)O[C@@]([H])(O[C@@]1([H])[C@@](O)([H])[C@@](N)([H])C[C@@](N)([H])[C@@]1([H])O[C@@]2([H])O[C@@]([H])(CN)[C@@](O)([H])[C@@](O)([H])[C@@]2(N)[H])[C@@]3(O)[H])[C@@](N)([H])[C@@](O)([H])[C@@]4(O)[H]	NA	0	Shen et al. J Chem Inf Model. 2010;50(6):1034-1041. DOI: 10.1021/ci100104j
1027	NC[C@@]3([H])O[C@@]([H])(O[C@@]2([H])[C@@](N)([H])C[C@@](N)([H])[C@@]([H])(O[C@@]1([H])O[C@@]([H])(CO)[C@@](O)([H])[C@@](N)([H])[C@@]1(O)[H])[C@@]2(O)[H])[C@@](O)([H])[C@@](O)([H])[C@@]3(O)[H]	6032	0	Shen et al. J Chem Inf Model. 2010;50(6):1034-1041. DOI: 10.1021/ci100104j
1028	NC[C@@]3([H])O[C@@]([H])(O[C@@]2([H])[C@@](N)([H])C[C@@](N)([H])[C@@]([H])(O[C@@]1([H])O[C@@]([H])(CO)[C@@](O)([H])[C@@](N)([H])[C@@]1(O)[H])[C@@]2(O)[H])[C@@](N)([H])C[C@@]3(O)[H]	36294	0	Shen et al. J Chem Inf Model. 2010;50(6):1034-1041. DOI: 10.1021/ci100104j
1029	NC[C@@]3([H])O[C@@]([H])(O[C@@]2([H])[C@@](N)([H])C[C@@](N)([H])[C@@]([H])(O[C@@]1([H])O[C@@]([H])(CO)[C@@](O)([H])[C@@](N)([H])[C@@]1(O)[H])[C@@]2(O)[H])[C@@](N)([H])[C@@](O)([H])[C@@]3(O)[H]	439318	0	Shen et al. J Chem Inf Model. 2010;50(6):1034-1041. DOI: 10.1021/ci100104j
1030	NC[C@@]3([H])O[C@@]([H])(O[C@@]2([H])[C@@](N)([H])C[C@@]([H])(NC([H])(CO)CO)[C@@]([H])(O[C@@]1([H])O[C@@]([H])(CO)[C@@](O)([H])[C@@](N)([H])[C@@]1(O)[H])[C@@]2(O)[H])[C@@](N)([H])[C@@](O)([H])[C@@]3(O)[H]	9872451	0	Shen et al. J Chem Inf Model. 2010;50(6):1034-1041. DOI: 10.1021/ci100104j
1031	NC[C@@]2([H])O[C@@]([H])(O[C@@]1([H])[C@@](N)([H])C[C@@](N)([H])[C@@](O)([H])[C@@]1(O)[H])[C@@](N)([H])[C@@](O)([H])[C@@]2(O)[H]	72392	0	Shen et al. J Chem Inf Model. 2010;50(6):1034-1041. DOI: 10.1021/ci100104j
1032	NC[C@@]1([H])CC[C@@](N)([H])[C@@]([H])(O1)O[C@@]3([H])[C@@](N)([H])C[C@@](N)([H])[C@@]([H])(O[C@@]2([H])O[C@@]([H])(CO)[C@@](O)([H])[C@@](N)([H])[C@@]2(O)[H])[C@@]3(O)[H]	470999	0	Shen et al. J Chem Inf Model. 2010;50(6):1034-1041. DOI: 10.1021/ci100104j
1033	NC[C@@](O)([H])C1=C/C=C(/O)C(O)=C1	439260	0	Shen et al. J Chem Inf Model. 2010;50(6):1034-1041. DOI: 10.1021/ci100104j
1034	NC/C1=C/C=C/C=C1/CC(=O)N[C@@]2([H])C(=O)N3C(=C(C[S][C@@]23[H])C[S]/C4=N/N=NN4CC(O)=O)C(O)=O	43507	0	Shen et al. J Chem Inf Model. 2010;50(6):1034-1041. DOI: 10.1021/ci100104j
1035	NC(N)=O	1176	1	Zhao et al. J Chem Inf Model. 2007;47(1):170–175. DOI:10.1021/ci600312d
1036	NC(N)=Nc1nc(CSCCC(N)=NS(N)(=O)=O)cs1	3325	1	Zhao et al. J Chem Inf Model. 2007;47(1):170–175. DOI:10.1021/ci600312d
1037	NC(N)=NC=1[S]/C=C(/C)N=1	2776666	1	Shen et al. J Chem Inf Model. 2010;50(6):1034-1041. DOI: 10.1021/ci100104j
1038	NC(N)=N/C1=N/C(=C[S]1)C2=CC=CC=C2	3763607	1	Shen et al. J Chem Inf Model. 2010;50(6):1034-1041. DOI: 10.1021/ci100104j
1039	NC(N)=N/C1=N/C(=C[S]1)C2=CC=CC(N)=C2	14022509	0	Shen et al. J Chem Inf Model. 2010;50(6):1034-1041. DOI: 10.1021/ci100104j
1040	NC(N)=N/C1=N/C(=C[S]1)C2=CC=CC(=C2)NC(NC)=NC#N	14022519	0	Shen et al. J Chem Inf Model. 2010;50(6):1034-1041. DOI: 10.1021/ci100104j
1041	NC(N)=N/C1=N/C(=C[S]1)C2=CC=CC(=C2)NC(C)=O	14022511	0	Shen et al. J Chem Inf Model. 2010;50(6):1034-1041. DOI: 10.1021/ci100104j
1042	NC(CO)C(=O)NNCc1ccc(O)c(O)c1O	2327	0	Zhao et al. J Chem Inf Model. 2007;47(1):170–175. DOI:10.1021/ci600312d
1043	NC(CCC(O)=O)C=C	5665	1	Zhao et al. J Chem Inf Model. 2007;47(1):170–175. DOI:10.1021/ci600312d
1044	NC(Cc1ccc(O)c(O)c1)C(O)=O	836	1	Zhao et al. J Chem Inf Model. 2007;47(1):170–175. DOI:10.1021/ci600312d
1045	NC(Cc1c[nH]c2ccccc12)C(O)=O	1148	1	Zhao et al. J Chem Inf Model. 2007;47(1):170–175. DOI:10.1021/ci600312d
1046	NC(Cc1c[nH]c2ccc(O)cc12)C(O)=O	144	1	Zhao et al. J Chem Inf Model. 2007;47(1):170–175. DOI:10.1021/ci600312d
1047	NC(CC=C)Cc1ccccc1	20254	1	Zhao et al. J Chem Inf Model. 2007;47(1):170–175. DOI:10.1021/ci600312d
1048	NC(C(=O)NC2C1SCC(=C(N1C2=O)C(O)=O)CSc3c[nH]nn3)c4ccc(O)cc4	4948	0	Zhao et al. J Chem Inf Model. 2007;47(1):170–175. DOI:10.1021/ci600312d
1049	NC(C(=O)NC2C1SCC(=C(N1C2=O)C(O)=O)Cl)c3ccccc3	2609	0	Zhao et al. J Chem Inf Model. 2007;47(1):170–175. DOI:10.1021/ci600312d
1050	NC(C(=O)NC2C1CCC(=C(N1C2=O)C(O)=O)Cl)c3ccccc3	3956	0	Zhao et al. J Chem Inf Model. 2007;47(1):170–175. DOI:10.1021/ci600312d
1051	NC(=O)OCCCc1ccccc1	4770	1	Zhao et al. J Chem Inf Model. 2007;47(1):170–175. DOI:10.1021/ci600312d
1052	NC(=O)OCC2C(NC(=O)C(=NOCC(O)=O)c1csc(N)n1)C(=O)N2S(O)(=O)=O	2584	0	Zhao et al. J Chem Inf Model. 2007;47(1):170–175. DOI:10.1021/ci600312d
1053	NC(=O)OCC(O)COc1ccc(Cl)cc1	2724	1	Zhao et al. J Chem Inf Model. 2007;47(1):170–175. DOI:10.1021/ci600312d
1054	NC(=O)OCC(COC(N)=O)c1ccccc1	3331	1	Zhao et al. J Chem Inf Model. 2007;47(1):170–175. DOI:10.1021/ci600312d
1055	NC(=O)OC1(CCCCC1)CC#C	9661	1	Shen et al. J Chem Inf Model. 2010;50(6):1034-1041. DOI: 10.1021/ci100104j
1056	NC(=O)OC1(CCCCC1)C#C	3284	1	Shen et al. J Chem Inf Model. 2010;50(6):1034-1041. DOI: 10.1021/ci100104j
1057	NC(=O)OC[C@@]1([H])N(C(=O)[C@@]1([H])NC(=O)C(=NOCC(O)=O)C2=C[S]C(N)=N2)[S](O)(=O)=O	6540466	0	Shen et al. J Chem Inf Model. 2010;50(6):1034-1041. DOI: 10.1021/ci100104j
1058	NC(=O)O[C@@]([H])(C#C)C1=CC=CC=C1	19111	1	Shen et al. J Chem Inf Model. 2010;50(6):1034-1041. DOI: 10.1021/ci100104j
1059	NC(=O)NCCN1CCN(CC1)c2cccc(c2)C(F)(F)F	71153	1	Zhao et al. J Chem Inf Model. 2007;47(1):170–175. DOI:10.1021/ci600312d
1060	NC(=O)NC(=O)Cc1ccccc1	4753	1	Zhao et al. J Chem Inf Model. 2007;47(1):170–175. DOI:10.1021/ci600312d
1061	NC(=O)N3C=1C=CC=CC=1[C@@]2([H])O[C@@]2([H])C=4C=CC=CC3=4	11021375	1	Shen et al. J Chem Inf Model. 2010;50(6):1034-1041. DOI: 10.1021/ci100104j
1062	NC(=O)N2c1ccccc1CC(=O)c3ccccc23	34312	1	Zhao et al. J Chem Inf Model. 2007;47(1):170–175. DOI:10.1021/ci600312d
1063	NC(=O)N2c1ccccc1C=Cc3ccccc23	2554	1	Zhao et al. J Chem Inf Model. 2007;47(1):170–175. DOI:10.1021/ci600312d
1064	NC(=O)N1CC(C1)Oc2cccc(c2)C(F)(F)F	146291	1	Zhao et al. J Chem Inf Model. 2007;47(1):170–175. DOI:10.1021/ci600312d
1065	NC(=O)CS(=O)C(c1ccccc1)c2ccccc2	4236	1	Zhao et al. J Chem Inf Model. 2007;47(1):170–175. DOI:10.1021/ci600312d
1066	NC(=O)CN2Cc1ccccc1OC2=O	29083	1	Zhao et al. J Chem Inf Model. 2007;47(1):170–175. DOI:10.1021/ci600312d
1067	NC(=O)CN2C(=O)C(c1ccccc1)c3ccccc23	208851	1	Zhao et al. J Chem Inf Model. 2007;47(1):170–175. DOI:10.1021/ci600312d
1068	NC(=O)CN1CCCC1=O	4843	1	Zhao et al. J Chem Inf Model. 2007;47(1):170–175. DOI:10.1021/ci600312d
1069	NC(=O)CN1CC(O)CC1=O	4626	1	Zhao et al. J Chem Inf Model. 2007;47(1):170–175. DOI:10.1021/ci600312d
1070	NC(=O)CN1C(=O)COc2ccccc12	3047812	1	Zhao et al. J Chem Inf Model. 2007;47(1):170–175. DOI:10.1021/ci600312d
1071	NC(=O)CCCN=C(c1ccc(Cl)cc1)c2cc(F)ccc2O	44115	1	Zhao et al. J Chem Inf Model. 2007;47(1):170–175. DOI:10.1021/ci600312d
1072	NC(=O)C4(CCN(CCCN2c1ccccc1CCc3ccccc23)CC4)N5CCCCC5	2580	1	Zhao et al. J Chem Inf Model. 2007;47(1):170–175. DOI:10.1021/ci600312d
1073	NC(=O)C4(CCN(CCCN2c1ccccc1CCc3ccc(Cl)cc23)CC4)N5CCCCC5	2793	1	Zhao et al. J Chem Inf Model. 2007;47(1):170–175. DOI:10.1021/ci600312d
1074	NC(=O)c2cn(Cc1c(F)cccc1F)nn2	129228	1	Zhao et al. J Chem Inf Model. 2007;47(1):170–175. DOI:10.1021/ci600312d
1075	NC(=O)C2c1ccccc1CCc3ccccc23	23603	1	Zhao et al. J Chem Inf Model. 2007;47(1):170–175. DOI:10.1021/ci600312d
1076	NC(=O)C2c1ccccc1C=Cc3ccccc23	25255	1	Zhao et al. J Chem Inf Model. 2007;47(1):170–175. DOI:10.1021/ci600312d
1077	NC(=O)C2(CCN(CCCC(=O)c1ccc(F)cc1)CC2)N3CCCCC3	4830	1	Zhao et al. J Chem Inf Model. 2007;47(1):170–175. DOI:10.1021/ci600312d
1078	NC(=O)c1ncn(n1)C2OC(CO)C(O)C2O	5064	1	Zhao et al. J Chem Inf Model. 2007;47(1):170–175. DOI:10.1021/ci600312d
1079	NC(=O)c1cnccn1	1046	1	Zhao et al. J Chem Inf Model. 2007;47(1):170–175. DOI:10.1021/ci600312d
1080	NC(=O)c1cccnc1	936	1	Zhao et al. J Chem Inf Model. 2007;47(1):170–175. DOI:10.1021/ci600312d
1081	NC(=O)c1ccccc1O	5147	1	Zhao et al. J Chem Inf Model. 2007;47(1):170–175. DOI:10.1021/ci600312d
1082	NC(=O)c1ccc(c2c1CC(CO2)N(C1CCC1)C1CCC1)F	12016890	1	Zhao et al. J Chem Inf Model. 2007;47(1):170–175. DOI:10.1021/ci600312d
1083	NC(=O)C1(CCN(CC1)CCC(C#N)(C2=CC=CC=C2)C3=CC=CC=C3)N4CCCCC4	9331	1	Shen et al. J Chem Inf Model. 2010;50(6):1034-1041. DOI: 10.1021/ci100104j
1084	NC(=O)C=1N=CN(N=1)[C@@]2([H])O[C@@]([H])(CO)[C@@](O)([H])[C@@]2(O)[H]	37542	1	Shen et al. J Chem Inf Model. 2010;50(6):1034-1041. DOI: 10.1021/ci100104j
1085	NC(=NO)C3=NNc1ccccc1N(Cc2ccccc2)C3=O	3047751	1	Zhao et al. J Chem Inf Model. 2007;47(1):170–175. DOI:10.1021/ci600312d
1086	NC(=N)NCCCOc1ccccc1	13923	1	Zhao et al. J Chem Inf Model. 2007;47(1):170–175. DOI:10.1021/ci600312d
1087	NC(=N)NCC2COC1(CCCCC1)O2	38521	0	Zhao et al. J Chem Inf Model. 2007;47(1):170–175. DOI:10.1021/ci600312d
1088	NC(=N)NC(=O)c1nc(Cl)c(N)nc1N	16231	0	Zhao et al. J Chem Inf Model. 2007;47(1):170–175. DOI:10.1021/ci600312d
1089	NC(=N)c1ccc(o1)c2ccccc2N(=O)=O	163304	1	Zhao et al. J Chem Inf Model. 2007;47(1):170–175. DOI:10.1021/ci600312d
1090	n1c(csc1[NH]=C(N)N)c1ccccc1	6346355	1	Zhao et al. J Chem Inf Model. 2007;47(1):170–175. DOI:10.1021/ci600312d
1091	n1c(csc1[NH]=C(N)N)c1cccc(c1)NC(NC)=[NH]C#N	NA	0	Zhao et al. J Chem Inf Model. 2007;47(1):170–175. DOI:10.1021/ci600312d
1092	n1c(csc1[NH]=C(N)N)c1cccc(c1)NC(C)=O	NA	0	Zhao et al. J Chem Inf Model. 2007;47(1):170–175. DOI:10.1021/ci600312d
1093	n1c(csc1[NH]=C(N)N)c1cccc(c1)N	NA	0	Zhao et al. J Chem Inf Model. 2007;47(1):170–175. DOI:10.1021/ci600312d
1094	n12c3c(C(c4c(cccc4)F)=NCc1cnc2CO)cc(Cl)cc3	107917	1	Zhao et al. J Chem Inf Model. 2007;47(1):170–175. DOI:10.1021/ci600312d
1095	N1(c2c(Sc3c1cccc3)cccc2)CCCNC	28315	1	Zhao et al. J Chem Inf Model. 2007;47(1):170–175. DOI:10.1021/ci600312d
1096	N1(c2c(Sc3c1cccc3)ccc(c2)SC)CCC1NCCCC1	558813	1	Zhao et al. J Chem Inf Model. 2007;47(1):170–175. DOI:10.1021/ci600312d
1097	N1(c2c(Sc3c1cccc3)ccc(c2)Cl)CCCNC	62875	1	Zhao et al. J Chem Inf Model. 2007;47(1):170–175. DOI:10.1021/ci600312d
1098	N1(c2c(Sc3c1cccc3)ccc(c2)Cl)CCCN	74981	1	Zhao et al. J Chem Inf Model. 2007;47(1):170–175. DOI:10.1021/ci600312d
1099	N1(c2c(CCc3c1cccc3)cccc2)CCCN	159642	1	Zhao et al. J Chem Inf Model. 2007;47(1):170–175. DOI:10.1021/ci600312d
1100	n1(c(c2nc[nH]c2n(c1=O)C)=O)C	2153	1	Zhao et al. J Chem Inf Model. 2007;47(1):170–175. DOI:10.1021/ci600312d
1101	N1([C@H]2C3CCN(C2)CC3)c2c(cccc2)CCc2c1cccc2	13255123	1	Roy et al. ACS Omega. 2019; 4(16):16774-16780. DOI: 10.1021/acsomega.9b01512
1102	N[C@H]1[C@@H](c2ccccc2)C1	6971118	1	Roy et al. ACS Omega. 2019; 4(16):16774-16780. DOI: 10.1021/acsomega.9b01512
1103	N[C@H](CC=C)Cc1ccccc1	76958826	1	Roy et al. ACS Omega. 2019; 4(16):16774-16780. DOI: 10.1021/acsomega.9b01512
1104	N[C@H](CC)Cc1c2c([nH]c1)cccc2	728636	1	Roy et al. ACS Omega. 2019; 4(16):16774-16780. DOI: 10.1021/acsomega.9b01512
1105	N[C@@H]1[C@@H](c2ccccc2)CCC1	11805068	1	Roy et al. ACS Omega. 2019; 4(16):16774-16780. DOI: 10.1021/acsomega.9b01512
1106	N[C@@H](Cc1ccccc1)C	32893	1	Roy et al. ACS Omega. 2019; 4(16):16774-16780. DOI: 10.1021/acsomega.9b01512
1107	N[C@@H](CC=C)c1c(-c2noc3c2cccc3)cccc1	9795264	1	Roy et al. ACS Omega. 2019; 4(16):16774-16780. DOI: 10.1021/acsomega.9b01512
1108	N[C@@]1([H])CONC1=O	6234	1	Shen et al. J Chem Inf Model. 2010;50(6):1034-1041. DOI: 10.1021/ci100104j
1109	N[C@@]1([H])[C@@]2([H])CN(C[C@@]12[H])C4=NC=3N(/C=C(/C(O)=O)C(=O)C=3/C=C4/[F])C5=C/C=C(/[F])C=C5[F]	62959	1	Shen et al. J Chem Inf Model. 2010;50(6):1034-1041. DOI: 10.1021/ci100104j
1110	N[C@@]([H])(C/C1=C/C=C(/O)C(O)=C1)C(O)=O	6047	0	Shen et al. J Chem Inf Model. 2010;50(6):1034-1041. DOI: 10.1021/ci100104j
1111	N[C@@]([H])(C(=O)N[C@@]1([H])C(=O)N2C(=C(C[S][C@@]12[H])C[S]/C3=C/NN=N3)C(O)=O)C4=C/C=C(/O)C=C4	6410758	0	Shen et al. J Chem Inf Model. 2010;50(6):1034-1041. DOI: 10.1021/ci100104j
1112	N[C@@]([H])(C(=O)N[C@@]1([H])C(=O)N2/C(=C(/[Cl])CC[C@@]12[H])C(O)=O)C3=CC=CC=C3	5284585	0	Shen et al. J Chem Inf Model. 2010;50(6):1034-1041. DOI: 10.1021/ci100104j
1113	N[C@@]([H])(C(=O)N[C@@]1([H])C(=O)N2/C(=C(/[Cl])C[S][C@@]12[H])C(O)=O)C3=CC=CC=C3	51039	0	Shen et al. J Chem Inf Model. 2010;50(6):1034-1041. DOI: 10.1021/ci100104j
1114	N/C1=N/C=NC=2N(C=NC1=2)[C@@]3([H])O[C@@]([H])(CO)[C@@](O)([H])[C@@]3(O)[H]	21704	1	Shen et al. J Chem Inf Model. 2010;50(6):1034-1041. DOI: 10.1021/ci100104j
1115	N/C1=N/C(=C[S]1)C(=CCC(O)=O)C(=O)N[C@@]2([H])C(=O)N3C(=CC[S][C@@]23[H])C(O)=O	5282242	0	Shen et al. J Chem Inf Model. 2010;50(6):1034-1041. DOI: 10.1021/ci100104j
1116	N/C1=N/C([Cl])=NC=2N(C=NC1=2)[C@@]3([H])C[C@@](O)([H])[C@@]([H])(CO)O3	20279	1	Shen et al. J Chem Inf Model. 2010;50(6):1034-1041. DOI: 10.1021/ci100104j
1117	N(N)[C@H](Cc1ccccc1)C	55279383	1	Roy et al. ACS Omega. 2019; 4(16):16774-16780. DOI: 10.1021/acsomega.9b01512
1118	N(N)[C@@H](CCCCCC)C	28082604	1	Roy et al. ACS Omega. 2019; 4(16):16774-16780. DOI: 10.1021/acsomega.9b01512
1119	N(N)[C@@H](C)c1ccccc1	12319532	1	Roy et al. ACS Omega. 2019; 4(16):16774-16780. DOI: 10.1021/acsomega.9b01512
1120	N(CCN1c2c(Sc3c1cccc3)cccc2)(CC)CC	65535	1	Roy et al. ACS Omega. 2019; 4(16):16774-16780. DOI: 10.1021/acsomega.9b01512
1121	N(CCCCCCCCC)[C@@H]1N=CNc2[nH]ccc12	NA	1	Roy et al. ACS Omega. 2019; 4(16):16774-16780. DOI: 10.1021/acsomega.9b01512
1122	N(CCCC)C[C@@H]1Oc2c(OC1)cccc2	40541300	1	Roy et al. ACS Omega. 2019; 4(16):16774-16780. DOI: 10.1021/acsomega.9b01512
1123	N(CCC[C@]1(c2ccccc2)OC(C)(C)c2c1cccc2)C	76958669	1	Roy et al. ACS Omega. 2019; 4(16):16774-16780. DOI: 10.1021/acsomega.9b01512
1124	N(CCC[C@]1(C)c2c(N(c3ccccc3)C1)cccc2)C	76964067	1	Roy et al. ACS Omega. 2019; 4(16):16774-16780. DOI: 10.1021/acsomega.9b01512
1125	N(CCC[C@@]1(c2ccccc2)SC(C)(C)c2c1cccc2)C	76965671	1	Roy et al. ACS Omega. 2019; 4(16):16774-16780. DOI: 10.1021/acsomega.9b01512
1126	N(CCC(C)C)C[C@H]1Oc2c(OC1)cccc2	40479673	1	Roy et al. ACS Omega. 2019; 4(16):16774-16780. DOI: 10.1021/acsomega.9b01512
1127	N(CC[C@]1(c2ccccc2)c2c(cccc2)C=C1)(C)C	76962258	1	Roy et al. ACS Omega. 2019; 4(16):16774-16780. DOI: 10.1021/acsomega.9b01512
1128	N(CC[C@]1(C)SCCc2c3c(n(CC)c12)cccc3)(C)C	76957660	1	Roy et al. ACS Omega. 2019; 4(16):16774-16780. DOI: 10.1021/acsomega.9b01512
1129	N(CC[C@@H](c1ccccc1)C1CCCCC1)(C)C	76971253	1	Roy et al. ACS Omega. 2019; 4(16):16774-16780. DOI: 10.1021/acsomega.9b01512
1130	N(CC[C@@]1(C)OCCC=2c3c(cccc3)CC1=2)(C)C	76957283	1	Roy et al. ACS Omega. 2019; 4(16):16774-16780. DOI: 10.1021/acsomega.9b01512
1131	N(CC/C=C\1/c2c(SCc3c/1cccc3)cccc2)(C)C	5284550	1	Roy et al. ACS Omega. 2019; 4(16):16774-16780. DOI: 10.1021/acsomega.9b01512
1132	N(CC/C=C\1/c2c(OCc3c/1cccc3)cccc2)(C)C	667477	1	Roy et al. ACS Omega. 2019; 4(16):16774-16780. DOI: 10.1021/acsomega.9b01512
1133	N(CC/C=C/1\c2c([C@H]3[C@@H](c4c\1cccc4)C3)cccc2)C	NA	1	Roy et al. ACS Omega. 2019; 4(16):16774-16780. DOI: 10.1021/acsomega.9b01512
1134	N(CC)[C@H]1[C@H](c2ccccc2)[C@H]2C[C@@H]1CC2	57098235	1	Roy et al. ACS Omega. 2019; 4(16):16774-16780. DOI: 10.1021/acsomega.9b01512
1135	N(C[C@H]1O[C@@]2(OC1)c1c(OCc3c2cccc3)cccc1)(C)C	76967825	1	Roy et al. ACS Omega. 2019; 4(16):16774-16780. DOI: 10.1021/acsomega.9b01512
1136	N(C[C@H](CN1c2c(Sc3c1cccc3)cccc2)C)(C)C	15558621	1	Roy et al. ACS Omega. 2019; 4(16):16774-16780. DOI: 10.1021/acsomega.9b01512
1137	N(C[C@H](CN1c2c(Sc3c1cccc3)ccc(CC)c2)C)(C)C	3246520	1	Roy et al. ACS Omega. 2019; 4(16):16774-16780. DOI: 10.1021/acsomega.9b01512
1138	N(C[C@H](CN1c2c(cccc2)CCc2c1cccc2)C)(C)C	5282594	1	Roy et al. ACS Omega. 2019; 4(16):16774-16780. DOI: 10.1021/acsomega.9b01512
1139	N(C[C@H](CC1c2c(cccc2)CCc2c1cccc2)C)(C)C	36687760	1	Roy et al. ACS Omega. 2019; 4(16):16774-16780. DOI: 10.1021/acsomega.9b01512
1140	N(C)[C@H]1Cc2scnc2CC1	15389007	1	Roy et al. ACS Omega. 2019; 4(16):16774-16780. DOI: 10.1021/acsomega.9b01512
1141	N(C)[C@H]1c2c([C@H](c3ccccc3)CC1)cccc2	163308	1	Roy et al. ACS Omega. 2019; 4(16):16774-16780. DOI: 10.1021/acsomega.9b01512
1142	N(C)[C@@H]1c2c3N(c4c(cccc4)CCc3ccc2)CC1	67279523	1	Roy et al. ACS Omega. 2019; 4(16):16774-16780. DOI: 10.1021/acsomega.9b01512
1143	N(C)[C@@H]1c2c(N(C)c3c(cccc3)C1)cccc2	76959954	1	Roy et al. ACS Omega. 2019; 4(16):16774-16780. DOI: 10.1021/acsomega.9b01512
1144	N(C)(C)c1nccc(C2=N[C@H](N)NN2)c1	NA	0	Roy et al. ACS Omega. 2019; 4(16):16774-16780. DOI: 10.1021/acsomega.9b01512
1145	N(C)(C)c1cc(C)c(C[C@H](N)C)cc1	6336525	1	Roy et al. ACS Omega. 2019; 4(16):16774-16780. DOI: 10.1021/acsomega.9b01512
1146	N(C)(C)[C@@H]1Cc2c3c([nH]c2CC1)cccc3	76965255	1	Roy et al. ACS Omega. 2019; 4(16):16774-16780. DOI: 10.1021/acsomega.9b01512
1147	N(C)(C)[C@@H]1[C@H](C)Oc2c(cccc2)C1	22811078	1	Roy et al. ACS Omega. 2019; 4(16):16774-16780. DOI: 10.1021/acsomega.9b01512
1148	N(=C/c1nc(C)ccc1)\N1CCN(C(c2ccccc2)c2ccccc2)CC1	5826113	1	Roy et al. ACS Omega. 2019; 4(16):16774-16780. DOI: 10.1021/acsomega.9b01512
1149	N([C@H](CN1c2c(Sc3c1cccc3)cccc2)C)(C)C	667687	1	Roy et al. ACS Omega. 2019; 4(16):16774-16780. DOI: 10.1021/acsomega.9b01512
1150	N([C@H](CN(C)C)CN1c2c(Sc3c1cccc3)cccc2)(C)C	76956348	1	Roy et al. ACS Omega. 2019; 4(16):16774-16780. DOI: 10.1021/acsomega.9b01512
1151	N([C@H](Cc1ccccc1)C)(Cc1occc1)C	71777433	1	Roy et al. ACS Omega. 2019; 4(16):16774-16780. DOI: 10.1021/acsomega.9b01512
1152	N([C@H](Cc1ccccc1)C)(Cc1ccccc1)C	5311017	1	Roy et al. ACS Omega. 2019; 4(16):16774-16780. DOI: 10.1021/acsomega.9b01512
1153	N([C@H](Cc1ccccc1)C)(CC#C)C	199605	1	Roy et al. ACS Omega. 2019; 4(16):16774-16780. DOI: 10.1021/acsomega.9b01512
1154	N([C@@H](Nc1cc(CC)ccc1)C)c1cc(CC)ccc1	NA	1	Roy et al. ACS Omega. 2019; 4(16):16774-16780. DOI: 10.1021/acsomega.9b01512
1155	N([C@@H](CN1c2c(Sc3c1cccc3)cccc2)C)(CC)CC	688098	1	Roy et al. ACS Omega. 2019; 4(16):16774-16780. DOI: 10.1021/acsomega.9b01512
1156	N([C@@H](Cc1ccccc1)C)CCC1c2c(Sc3c1cccc3)cccc2	76961362	1	Roy et al. ACS Omega. 2019; 4(16):16774-16780. DOI: 10.1021/acsomega.9b01512
1157	N([C@@H](Cc1ccccc1)C)C	36604	1	Roy et al. ACS Omega. 2019; 4(16):16774-16780. DOI: 10.1021/acsomega.9b01512
1158	N([C@@H](Cc1ccccc1)C)(C)C	6990520	1	Roy et al. ACS Omega. 2019; 4(16):16774-16780. DOI: 10.1021/acsomega.9b01512
1159	N([C@@H](Cc1ccccc1)[C@H]1OCCC1)CC	71308304	1	Roy et al. ACS Omega. 2019; 4(16):16774-16780. DOI: 10.1021/acsomega.9b01512
1160	N#CN.N(CNc1cc(-c2nc(N)sc2)ccc1)C.NCN	NA	0	Roy et al. ACS Omega. 2019; 4(16):16774-16780. DOI: 10.1021/acsomega.9b01512
1161	N#CCNC1CCc2ccccc12	18627836	1	Zhao et al. J Chem Inf Model. 2007;47(1):170–175. DOI:10.1021/ci600312d
1162	N#CCN[C@H]1c2c(cccc2)CC1	44236413	1	Roy et al. ACS Omega. 2019; 4(16):16774-16780. DOI: 10.1021/acsomega.9b01512
1163	N#CCN[C@@]1([H])CCC2=CC=CC=C12	3052776	1	Shen et al. J Chem Inf Model. 2010;50(6):1034-1041. DOI: 10.1021/ci100104j
1164	N#CCC=1c2c(N=C(N3CCN(C)CC3)C=3C=1CSC=3)csc2	NA	1	Roy et al. ACS Omega. 2019; 4(16):16774-16780. DOI: 10.1021/acsomega.9b01512
1165	N#Cc1cc2N(C[C@@H](CN(C)C)C)c3c(Sc2cc1)cccc3	14050068	1	Roy et al. ACS Omega. 2019; 4(16):16774-16780. DOI: 10.1021/acsomega.9b01512
1166	N#CC[C@H]1CN(C)[C@H]2[C@@H](c3c4c([nH]cc4C2)ccc3)C1	12782965	1	Roy et al. ACS Omega. 2019; 4(16):16774-16780. DOI: 10.1021/acsomega.9b01512
1167	N#C[C@H](N[C@H](Cc1ccccc1)C)c1ccccc1	34174370	1	Roy et al. ACS Omega. 2019; 4(16):16774-16780. DOI: 10.1021/acsomega.9b01512
1168	N#C/N=C(/NCC[S]C/C1=N/C=C/C=C1/[Br])NCC	14022517	0	Shen et al. J Chem Inf Model. 2010;50(6):1034-1041. DOI: 10.1021/ci100104j
1169	N#C/C4=C/C=C3OC1=CC=CC=C1C=2CCN(CCC=2C3=C4)CC5([H])CCCC5	54359	1	Shen et al. J Chem Inf Model. 2010;50(6):1034-1041. DOI: 10.1021/ci100104j
1170	N#C/C1=C/C(=N/N=C1/NCCN2CCOCC2)C3=CC=CC=C3	72119	1	Shen et al. J Chem Inf Model. 2010;50(6):1034-1041. DOI: 10.1021/ci100104j
1171	FCOC(C(F)(F)F)C(F)(F)F	5206	1	Zhao et al. J Chem Inf Model. 2007;47(1):170–175. DOI:10.1021/ci600312d
1172	FCO/N=C(/C(=O)N[C@@H]1C(=O)N2C(C(=O)O)=C(/C=C/C[N+](CC(=O)N)(CC)[C-H2])CS[C@H]12)\c1nc(N)sn1	NA	0	Roy et al. ACS Omega. 2019; 4(16):16774-16780. DOI: 10.1021/acsomega.9b01512
1173	FCC(F)(F)F	13129	1	Zhao et al. J Chem Inf Model. 2007;47(1):170–175. DOI:10.1021/ci600312d
1174	Fc5ccc4c(CCCN1CCC(CC1)n2c(=O)[nH]c3ccccc23)noc4c5	55463	1	Zhao et al. J Chem Inf Model. 2007;47(1):170–175. DOI:10.1021/ci600312d
1175	Fc4ccc3[nH]c2CCN(CCCc1cccnc1)Cc2c3c4	60547	1	Zhao et al. J Chem Inf Model. 2007;47(1):170–175. DOI:10.1021/ci600312d
1176	Fc4ccc3[nH]c2CCN(CCc1ccncc1)Cc2c3c4	72038	1	Zhao et al. J Chem Inf Model. 2007;47(1):170–175. DOI:10.1021/ci600312d
1177	Fc4ccc(OCCCN1CCC2(CC1)N(CNC2=O)c3ccccc3)cc4	68186	1	Zhao et al. J Chem Inf Model. 2007;47(1):170–175. DOI:10.1021/ci600312d
1178	Fc1ccccc1C3=NCC(=O)N(CC2CC2)c4ccc(Cl)cc34	3400	1	Zhao et al. J Chem Inf Model. 2007;47(1):170–175. DOI:10.1021/ci600312d
1179	Fc1ccccc1C23OCCN2CC(=O)Nc4ccc(Br)cc34	3563	1	Zhao et al. J Chem Inf Model. 2007;47(1):170–175. DOI:10.1021/ci600312d
1180	Fc1ccccc1C2=NCCN(CC(F)(F)F)c3ccc(Cl)cc23	36834	1	Zhao et al. J Chem Inf Model. 2007;47(1):170–175. DOI:10.1021/ci600312d
1181	Fc1ccccc1C2=NCC(=S)N(CC(F)(F)F)c3ccc(Cl)cc23	4999	1	Zhao et al. J Chem Inf Model. 2007;47(1):170–175. DOI:10.1021/ci600312d
1182	Fc1cccc(Br)c1NC2=NCCN2	71969	1	Zhao et al. J Chem Inf Model. 2007;47(1):170–175. DOI:10.1021/ci600312d
1183	Fc1ccc(OC[C@H](O)CN2CCC(N(C)c3sc4c(n3)cccc4)CC2)cc1	14575844	1	Roy et al. ACS Omega. 2019; 4(16):16774-16780. DOI: 10.1021/acsomega.9b01512
1184	Fc1ccc(-n2ncc3c2C=C2[C@](C)([C@H]4[C@@H]([C@@H]5[C@@](C)([C@@](O)(C#C)CC5)CC4)CC2)C3)cc1	NA	1	Roy et al. ACS Omega. 2019; 4(16):16774-16780. DOI: 10.1021/acsomega.9b01512
1185	Fc1ccc(N2CCN(CC[C@@H](NC(=O)c3cnccc3)C)CC2)cc1	76956129	1	Roy et al. ACS Omega. 2019; 4(16):16774-16780. DOI: 10.1021/acsomega.9b01512
1186	Fc1ccc(N2CCN(C[C@@H](O)COC3(C#C)CCCCC3)CC2)cc1	30844633	1	Roy et al. ACS Omega. 2019; 4(16):16774-16780. DOI: 10.1021/acsomega.9b01512
1187	Fc1ccc(CN[C@H](C(C)C)CCCCCC(=O)O)cc1	76957764	1	Roy et al. ACS Omega. 2019; 4(16):16774-16780. DOI: 10.1021/acsomega.9b01512
1188	Fc1ccc(cc1)n4cc(C2CCN(CC2)CCN3CCNC3=O)c5cc(Cl)ccc45	60149	1	Zhao et al. J Chem Inf Model. 2007;47(1):170–175. DOI:10.1021/ci600312d
1189	Fc1ccc(cc1)N2CNC(=O)C24CCN(CCCC(=O)c3ccc(F)cc3)CC4	166535	1	Zhao et al. J Chem Inf Model. 2007;47(1):170–175. DOI:10.1021/ci600312d
1190	Fc1ccc(cc1)c5ccc(CN2CCN(CC2)c3cccc4ccoc34)[nH]5	208917	1	Zhao et al. J Chem Inf Model. 2007;47(1):170–175. DOI:10.1021/ci600312d
1191	Fc1ccc(cc1)C4CC5CN(CCn3c(=O)[nH]c2ccccc2c3=O)CC45	22025970	1	Zhao et al. J Chem Inf Model. 2007;47(1):170–175. DOI:10.1021/ci600312d
1192	Fc1ccc(cc1)C2CCNCC2COc4ccc3OCOc3c4	4691	1	Zhao et al. J Chem Inf Model. 2007;47(1):170–175. DOI:10.1021/ci600312d
1193	Fc1ccc(cc1)C2CCN(CC2COc4ccc3OCOc3c4)CC(=O)c5ccc(F)cc5	9981949	1	Zhao et al. J Chem Inf Model. 2007;47(1):170–175. DOI:10.1021/ci600312d
1194	Fc1ccc(cc1)C(CCCN2CCC3(CC2)N(CNC3=O)c4ccccc4)c5ccc(F)cc5	3396	1	Zhao et al. J Chem Inf Model. 2007;47(1):170–175. DOI:10.1021/ci600312d
1195	Fc1ccc(cc1)C(CCCN2CCC(CC2)n3c(=O)[nH]c4ccccc34)c5ccc(F)cc5	16362	1	Zhao et al. J Chem Inf Model. 2007;47(1):170–175. DOI:10.1021/ci600312d
1196	Fc1ccc(cc1)C(CCCN2CCC(CC2)n3c(=O)[nH]c4cc(Cl)ccc34)c5ccc(F)cc5	65449	1	Zhao et al. J Chem Inf Model. 2007;47(1):170–175. DOI:10.1021/ci600312d
1197	Fc1ccc(cc1)C(=O)NCCN2CCC(CC2)n3c(=O)[nH]c4cc(Cl)ccc34	65490	1	Zhao et al. J Chem Inf Model. 2007;47(1):170–175. DOI:10.1021/ci600312d
1198	Fc1ccc(cc1)C(=O)CCCN5CCN4Cc3[nH]c2ccccc2c3CC4C5	68663	1	Zhao et al. J Chem Inf Model. 2007;47(1):170–175. DOI:10.1021/ci600312d
1199	Fc1ccc(cc1)C(=O)CCCN3CCN2CCCC2C3	18484	1	Zhao et al. J Chem Inf Model. 2007;47(1):170–175. DOI:10.1021/ci600312d
1200	Fc1ccc(cc1)C(=O)CCCN3CC2CCC(CC2)C3	3037070	1	Zhao et al. J Chem Inf Model. 2007;47(1):170–175. DOI:10.1021/ci600312d
1201	Fc1ccc(cc1)C(=O)CCCN2CCN(CC2)c4cc3ccccc3cn4	133832	1	Zhao et al. J Chem Inf Model. 2007;47(1):170–175. DOI:10.1021/ci600312d
1202	Fc1ccc(cc1)C(=O)CCCN2CCN(CC2)c3ccccn3	15443	1	Zhao et al. J Chem Inf Model. 2007;47(1):170–175. DOI:10.1021/ci600312d
1203	Fc1ccc(cc1)C(=O)CCCN2CCN(CC2)C(=O)OC3CCCCC3	198061	1	Zhao et al. J Chem Inf Model. 2007;47(1):170–175. DOI:10.1021/ci600312d
1204	Fc1ccc(cc1)C(=O)CCCN2CCC3(CC2)N(CNC3=O)c4ccccc4	5265	1	Zhao et al. J Chem Inf Model. 2007;47(1):170–175. DOI:10.1021/ci600312d
1205	Fc1ccc(cc1)C(=O)CCCN2CCC(CC2)n3c(=S)[nH]c4ccccc34	3033151	1	Zhao et al. J Chem Inf Model. 2007;47(1):170–175. DOI:10.1021/ci600312d
1206	Fc1ccc(cc1)C(=O)CCCN2CCC(CC2)n3c(=O)[nH]c4ccccc34	16363	1	Zhao et al. J Chem Inf Model. 2007;47(1):170–175. DOI:10.1021/ci600312d
1207	Fc1ccc(cc1)C(=O)CCCN2CCC(CC2)C(=O)c3ccc(F)cc3	32593	1	Zhao et al. J Chem Inf Model. 2007;47(1):170–175. DOI:10.1021/ci600312d
1208	Fc1ccc(cc1)C(=O)CCCN2CCC(CC2)C(=O)c3ccc(Cl)cc3	41536	1	Zhao et al. J Chem Inf Model. 2007;47(1):170–175. DOI:10.1021/ci600312d
1209	Fc1ccc(cc1)C(=O)CCCN2CCC(=CC2)n3c(=O)[nH]c4ccccc34	3168	1	Zhao et al. J Chem Inf Model. 2007;47(1):170–175. DOI:10.1021/ci600312d
1210	Fc1ccc(cc1)C(=O)C5CCN(CCCN3c2ccccc2Sc4ccc(cc34)C(F)(F)F)CC5	43876	1	Zhao et al. J Chem Inf Model. 2007;47(1):170–175. DOI:10.1021/ci600312d
1211	Fc1ccc(cc1)C(=O)C4CCN(CCCn2c(=O)[nH]c3ccccc23)CC4	71744	1	Zhao et al. J Chem Inf Model. 2007;47(1):170–175. DOI:10.1021/ci600312d
1212	Fc1ccc(cc1)C(=O)C4CCN(CCCn2c(=O)[nH]c3cc(Cl)ccc23)CC4	65489	1	Zhao et al. J Chem Inf Model. 2007;47(1):170–175. DOI:10.1021/ci600312d
1213	Fc1ccc(-c2c(/C=C/[C@H](O)C[C@H](O)CC(=O)O)c(C(C)C)nc(C(C)C)c2COC)cc1	92328084	1	Roy et al. ACS Omega. 2019; 4(16):16774-16780. DOI: 10.1021/acsomega.9b01512
1214	Fc1ccc(-c2c(/C=C/[C@@H](O)C[C@H](O)CC(=O)O)n(C(C)C)c3c2cccc3)cc1	6347538	1	Roy et al. ACS Omega. 2019; 4(16):16774-16780. DOI: 10.1021/acsomega.9b01512
1215	Fc1ccc(C2=NC[C@H](CNC(=O)c3ccc(C)cc3)N(C)c3c2ccc(C)c3)cc1	44310001	1	Roy et al. ACS Omega. 2019; 4(16):16774-16780. DOI: 10.1021/acsomega.9b01512
1216	Fc1ccc(C2=C(/C=C/[C@@H](O)C[C@@H](O)CC(=O)OCC)C3(Oc4c2cccc4)CCCC3)cc1	6918165	1	Roy et al. ACS Omega. 2019; 4(16):16774-16780. DOI: 10.1021/acsomega.9b01512
1217	Fc1ccc(C(CCCN2CCN(CCNc3ccccc3)CC2)c2ccc(F)cc2)cc1	21693	1	Roy et al. ACS Omega. 2019; 4(16):16774-16780. DOI: 10.1021/acsomega.9b01512
1218	Fc1ccc(C(=O)CN2C[C@H](COc3cc4OCOc4cc3)[C@@H](c3ccc(F)cc3)CC2)cc1	3047803	1	Roy et al. ACS Omega. 2019; 4(16):16774-16780. DOI: 10.1021/acsomega.9b01512
1219	Fc1ccc(C(=O)CCCN2C[C@H]3[N@](CC2)CCC3)cc1	667420	1	Roy et al. ACS Omega. 2019; 4(16):16774-16780. DOI: 10.1021/acsomega.9b01512
1220	Fc1ccc(C(=O)CCCN2C[C@H]3[N@@](Cc4[nH]c5c(c4C3)cccc5)CC2)cc1	198236	1	Roy et al. ACS Omega. 2019; 4(16):16774-16780. DOI: 10.1021/acsomega.9b01512
1221	Fc1ccc([C@H](O)CCCN2CCN(c3c(OC)cccc3)CC2)cc1	76956442	1	Roy et al. ACS Omega. 2019; 4(16):16774-16780. DOI: 10.1021/acsomega.9b01512
1222	Fc1ccc([C@@H]2[C@H]3[C@H](CN(CCN4C(=O)Nc5c(C4=O)cccc5)C3)C2)cc1	NA	1	Roy et al. ACS Omega. 2019; 4(16):16774-16780. DOI: 10.1021/acsomega.9b01512
1223	Fc1ccc([C@@H]2[C@@H](COc3cc4OCOc4cc3)CNCC2)cc1	667572	1	Roy et al. ACS Omega. 2019; 4(16):16774-16780. DOI: 10.1021/acsomega.9b01512
1224	Fc1ccc([C@@H](C)n2c(C(=O)OCC)cnc2)cc1	14305206	1	Roy et al. ACS Omega. 2019; 4(16):16774-16780. DOI: 10.1021/acsomega.9b01512
1225	Fc1ccc([C@@]2(CCCN(C)C)OCc3c2ccc(C#N)c3)cc1	6101829	1	Roy et al. ACS Omega. 2019; 4(16):16774-16780. DOI: 10.1021/acsomega.9b01512
1226	Fc1ccc(/C(=C/CCN2CCC3(N(c4ccccc4)CNC3=O)CC2)/C)cc1	6504344	1	Roy et al. ACS Omega. 2019; 4(16):16774-16780. DOI: 10.1021/acsomega.9b01512
1227	Fc1cc2onc(C3CCN(CCC=4C(=O)N5C([C@H](O)CCC5)=NC=4C)CC3)c2cc1	9802545	1	Roy et al. ACS Omega. 2019; 4(16):16774-16780. DOI: 10.1021/acsomega.9b01512
1228	Fc1cc2onc(C3CCN(CCC=4C(=O)N5[C@H](C(C)=CC=C5)NC=4C)CC3)c2cc1	NA	1	Roy et al. ACS Omega. 2019; 4(16):16774-16780. DOI: 10.1021/acsomega.9b01512
1229	Fc1cc2N3[C@H](CN(C)CC3)CN=C(c3sccc3)c2cc1	76968349	1	Roy et al. ACS Omega. 2019; 4(16):16774-16780. DOI: 10.1021/acsomega.9b01512
1230	Fc1cc2N(C)[C@H](CNC(=O)c3cocc3)CN=C(c3ccccc3)c2cc1	67279390	1	Roy et al. ACS Omega. 2019; 4(16):16774-16780. DOI: 10.1021/acsomega.9b01512
1231	Fc1cc2c(n(-c3ccc(F)cc3)c3c2CN(CCC[C@@H](O)c2ccc(F)cc2)CC3)cc1	76966634	1	Roy et al. ACS Omega. 2019; 4(16):16774-16780. DOI: 10.1021/acsomega.9b01512
1232	Fc1cc2c([C@H](C(C)C)[C@](OC(=O)COC)(CCN(CCCc3[nH]c4c(n3)cccc4)C)CC2)cc1	69895885	0	Roy et al. ACS Omega. 2019; 4(16):16774-16780. DOI: 10.1021/acsomega.9b01512
1233	Fc1cc(F)cc(CC(=O)N2[C@@H](CN3C[C@H](O)CC3)CN(C(=O)C)CC2)c1	44310781	0	Roy et al. ACS Omega. 2019; 4(16):16774-16780. DOI: 10.1021/acsomega.9b01512
1234	Fc1c2OC[C@H](N(C3CCC3)C3CCC3)Cc2c(C(=O)N)cc1	3055171	1	Roy et al. ACS Omega. 2019; 4(16):16774-16780. DOI: 10.1021/acsomega.9b01512
1235	Fc1c2[nH]c3c(c2cc(F)c1)C[C@H](N(C)C)CC3	76967737	1	Roy et al. ACS Omega. 2019; 4(16):16774-16780. DOI: 10.1021/acsomega.9b01512
1236	Fc1c(N2CCN(C)CC2)c2OC[C@H](C)N3c2c(C(=O)C(C(=O)O)=C3)c1	149096	0	Roy et al. ACS Omega. 2019; 4(16):16774-16780. DOI: 10.1021/acsomega.9b01512
1237	Fc1c(N2C[C@@H](C)NCC2)c(F)cc2C(=O)C(C(=O)O)=CN(CC)c12	9843232	0	Roy et al. ACS Omega. 2019; 4(16):16774-16780. DOI: 10.1021/acsomega.9b01512
1238	Fc1c(N2C[C@@H](C)N[C@@H](C)C2)c(F)c2N(C3CC3)C=C(C(=O)O)C(=O)c2c1N	60464	0	Roy et al. ACS Omega. 2019; 4(16):16774-16780. DOI: 10.1021/acsomega.9b01512
1239	Fc1c(N2C[C@@]3(C)[C@H]([C@@H](N)C3)C2)nc2N(C3CC3)C=C(C(=O)O)C(=O)c2c1	178066	0	Roy et al. ACS Omega. 2019; 4(16):16774-16780. DOI: 10.1021/acsomega.9b01512
1240	Fc1c(N(C(=O)COC)[C@@H]2[C@@H](C)CN(CCN3C(=O)N(CC)N=N3)CC2)cccc1	NA	1	Roy et al. ACS Omega. 2019; 4(16):16774-16780. DOI: 10.1021/acsomega.9b01512
1241	Fc1c(C(O)(CN2NC=NC2)CN2NC=NC2)ccc(F)c1	140373718	1	Roy et al. ACS Omega. 2019; 4(16):16774-16780. DOI: 10.1021/acsomega.9b01512
1242	Fc1c([C@@H](O)CNC(C)(C)C)cccc1	38988172	1	Roy et al. ACS Omega. 2019; 4(16):16774-16780. DOI: 10.1021/acsomega.9b01512
1243	FC1=C(C(=O)O)N2C(=O)[C@H]([C@@H](O)C)[C@H]2S1	NA	0	Roy et al. ACS Omega. 2019; 4(16):16774-16780. DOI: 10.1021/acsomega.9b01512
1244	FC(F)OC(F)C(F)(F)F	42113	1	Zhao et al. J Chem Inf Model. 2007;47(1):170–175. DOI:10.1021/ci600312d
1245	FC(F)OC(F)(F)C(F)Cl	3226	1	Zhao et al. J Chem Inf Model. 2007;47(1):170–175. DOI:10.1021/ci600312d
1246	FC(F)OC(Cl)C(F)(F)F	3763	1	Zhao et al. J Chem Inf Model. 2007;47(1):170–175. DOI:10.1021/ci600312d
1247	FC(F)(F)COC=C	9844	1	Zhao et al. J Chem Inf Model. 2007;47(1):170–175. DOI:10.1021/ci600312d
1248	FC(F)(F)CN2C(=O)CN=C(c1ccccc1)c3cc(Cl)ccc23	31640	1	Zhao et al. J Chem Inf Model. 2007;47(1):170–175. DOI:10.1021/ci600312d
1249	FC(F)(F)c5ccc4Sc1ccccc1N(CCCN3CCN(CCC2OCCCO2)CC3)c4c5	62862	1	Zhao et al. J Chem Inf Model. 2007;47(1):170–175. DOI:10.1021/ci600312d
1250	FC(F)(F)c5ccc4Sc1ccccc1N(CCCN2CCN(CC2)C3CC3)c4c5	28690	1	Zhao et al. J Chem Inf Model. 2007;47(1):170–175. DOI:10.1021/ci600312d
1251	FC(F)(F)c1nc2c(C(F)(F)F)cccc2c([C@H](O)[C@@H]2NCCCC2)c1	40692	1	Roy et al. ACS Omega. 2019; 4(16):16774-16780. DOI: 10.1021/acsomega.9b01512
1252	FC(F)(F)c1cccc(c1)N2CCN(CC2)CCc4nnc5C3CCCC3Cn45	13748845	1	Zhao et al. J Chem Inf Model. 2007;47(1):170–175. DOI:10.1021/ci600312d
1253	FC(F)(F)c1cccc(c1)C1=CCN(CCc2ccc3ccccc3c2)CC1	128919	1	Zhao et al. J Chem Inf Model. 2007;47(1):170–175. DOI:10.1021/ci600312d
1254	FC(F)(F)c1ccc(O[C@H](CCNC)c2ccccc2)cc1	1548970	1	Roy et al. ACS Omega. 2019; 4(16):16774-16780. DOI: 10.1021/acsomega.9b01512
1255	FC(F)(F)c1ccc(O[C@H](CCN)c2ccccc2)cc1	9797657	1	Roy et al. ACS Omega. 2019; 4(16):16774-16780. DOI: 10.1021/acsomega.9b01512
1256	FC(F)(F)c1ccc(CC(=O)N2[C@H](CN3CCCC3)CCCC2)cc1	9865223	1	Roy et al. ACS Omega. 2019; 4(16):16774-16780. DOI: 10.1021/acsomega.9b01512
1257	FC(F)(F)c1ccc(CC(=O)N2[C@@H](CN3C[C@H](O)CC3)CN(C(=O)C)CC2)cc1	44310838	0	Roy et al. ACS Omega. 2019; 4(16):16774-16780. DOI: 10.1021/acsomega.9b01512
1258	FC(F)(F)c1ccc(/C(=N/OCCN)/CCCCOC)cc1	5361192	1	Roy et al. ACS Omega. 2019; 4(16):16774-16780. DOI: 10.1021/acsomega.9b01512
1259	FC(F)(F)c1cc2N(C[C@@H](CN(C)C)C)c3c(Sc2cc1)cccc3	76968640	1	Roy et al. ACS Omega. 2019; 4(16):16774-16780. DOI: 10.1021/acsomega.9b01512
1260	FC(F)(F)c1cc2[C@H](CCCN3CCN(CCO)CC3)c3c(Sc2cc1)cc(F)cc3	76960128	1	Roy et al. ACS Omega. 2019; 4(16):16774-16780. DOI: 10.1021/acsomega.9b01512
1261	FC(F)(F)c1cc2[C@@H](N3CCN(CCO)CC3)C[C@H](c3ccc(F)cc3)c2cc1	6917689	1	Roy et al. ACS Omega. 2019; 4(16):16774-16780. DOI: 10.1021/acsomega.9b01512
1262	FC(F)(F)c1cc2[C@@H](CCCN(C)C)c3c([C@@H](C)c2cc1)cccc3	76957024	1	Roy et al. ACS Omega. 2019; 4(16):16774-16780. DOI: 10.1021/acsomega.9b01512
1263	FC(F)(F)c1cc2/C(=C/CCN3CCN(CCO)CC3)/c3c(Sc2cc1)cccc3	5281878	1	Roy et al. ACS Omega. 2019; 4(16):16774-16780. DOI: 10.1021/acsomega.9b01512
1264	FC(F)(F)c1cc2/C(=C/CCN3CCC(CCO)CC3)/c3c(Sc2cc1)cc(F)cc3	5477380	1	Roy et al. ACS Omega. 2019; 4(16):16774-16780. DOI: 10.1021/acsomega.9b01512
1265	FC(F)(F)c1cc(N2CCN(CCc3n4c(nn3)[C@H]3[C@H](C4)CCC3)CC2)ccc1	NA	1	Roy et al. ACS Omega. 2019; 4(16):16774-16780. DOI: 10.1021/acsomega.9b01512
1266	FC(F)(F)c1cc([C@H]2OCCN(C(C)C)C2)ccc1	76967875	1	Roy et al. ACS Omega. 2019; 4(16):16774-16780. DOI: 10.1021/acsomega.9b01512
1267	FC(F)(F)C1(OC(=O)Nc2ccc(Cl)cc12)C#CC3CC3	3203	0	Zhao et al. J Chem Inf Model. 2007;47(1):170–175. DOI:10.1021/ci600312d
1268	FC(F)(F)C(Cl)Br	3562	1	Zhao et al. J Chem Inf Model. 2007;47(1):170–175. DOI:10.1021/ci600312d
1269	FC(F)(F)[C@@H](O)CCOc1ccc(N2C(=O)O[C@H](COC)C2)cc1	18646248	1	Roy et al. ACS Omega. 2019; 4(16):16774-16780. DOI: 10.1021/acsomega.9b01512
1270	FC(F)(Cl)C(F)(F)Cl	6429	1	Zhao et al. J Chem Inf Model. 2007;47(1):170–175. DOI:10.1021/ci600312d
1271	F[C@H]1C=2[C@](C)([C@H]3[C@@H](O)C[C@@]4(C)[C@H](C(=O)COC(=O)CCCCC)[C@H](C)C[C@@H]4[C@H]3C1)C=CC(=O)C=2	NA	1	Roy et al. ACS Omega. 2019; 4(16):16774-16780. DOI: 10.1021/acsomega.9b01512
1272	F[C@H]1C=2[C@](C)([C@H]3[C@@H](O)C[C@@]4(C)[C@H](C(=O)CO)[C@H](C)C[C@@H]4[C@H]3C1)C=CC(=O)C=2	NA	1	Roy et al. ACS Omega. 2019; 4(16):16774-16780. DOI: 10.1021/acsomega.9b01512
1273	F[C@H]1C=2[C@](C)([C@]3(F)[C@@H](O)C[C@]4(C)[C@@](O)(C(=O)COC(=O)C(C)(C)C)[C@@H](C)C[C@@H]4[C@H]3C1)C=CC(=O)C=2	NA	1	Roy et al. ACS Omega. 2019; 4(16):16774-16780. DOI: 10.1021/acsomega.9b01512
1274	F[C@H]1C=2[C@](C)([C@]3(F)[C@@H](O)C[C@]4(C)[C@@](O)(C(=O)CO)[C@@H](C)C[C@@H]4[C@H]3C1)C=CC(=O)C=2	NA	1	Roy et al. ACS Omega. 2019; 4(16):16774-16780. DOI: 10.1021/acsomega.9b01512
1275	F[C@H]1C=2[C@](C)([C@]3(F)[C@@H](O)C[C@@]4(C)[C@H](C(=O)CO)[C@H](C)C[C@@H]4[C@H]3C1)C=CC(=O)C=2	NA	1	Roy et al. ACS Omega. 2019; 4(16):16774-16780. DOI: 10.1021/acsomega.9b01512
1276	F[C@H]1C=2[C@](C)([C@]3(F)[C@@H](O)C[C@@]4(C)[C@]5(C(=O)COC(=O)CC)OC(C)(C)O[C@@H]5C[C@@H]4[C@H]3C1)C=CC(=O)C=2	NA	1	Roy et al. ACS Omega. 2019; 4(16):16774-16780. DOI: 10.1021/acsomega.9b01512
1277	F[C@H]1C=2[C@](C)([C@]3(F)[C@@H](O)C[C@@]4(C)[C@](OC(=O)CCC)(C(=O)COC(=O)C)CC[C@@H]4[C@H]3C1)C=CC(=O)C=2	NA	1	Roy et al. ACS Omega. 2019; 4(16):16774-16780. DOI: 10.1021/acsomega.9b01512
1278	F[C@H]1C=2[C@](C)([C@@H]3[C@@H](O)C[C@@]4(C)[C@](O)(C(=O)CO)CC[C@@H]4[C@H]3C1)C=CC(=O)C=2	NA	1	Roy et al. ACS Omega. 2019; 4(16):16774-16780. DOI: 10.1021/acsomega.9b01512
1279	F[C@H]1C=2[C@@](C)([C@@H]3[C@H](O)C[C@]4(C)[C@@]5(C(=O)CO)OC(C)(C)O[C@H]5C[C@@H]4[C@H]3C1)CCC(=O)C=2	NA	1	Roy et al. ACS Omega. 2019; 4(16):16774-16780. DOI: 10.1021/acsomega.9b01512
1280	F[C@H]1C=2[C@@](C)([C@@]3(F)[C@H](O)C[C@]4(C)[C@@]5(C(=O)C(OC)OC)OC(C)(C)O[C@H]5C[C@@H]4[C@H]3C1)C=CC(=O)C=2	NA	1	Roy et al. ACS Omega. 2019; 4(16):16774-16780. DOI: 10.1021/acsomega.9b01512
1281	F[C@H]1C=2[C@@](C)([C@@]3(F)[C@H](O)C[C@@]4(C)[C@]5(C(=O)COC(=O)C6CC6)OC(C)(C)O[C@H]5C[C@@H]4[C@H]3C1)C=CC(=O)C=2	NA	1	Roy et al. ACS Omega. 2019; 4(16):16774-16780. DOI: 10.1021/acsomega.9b01512
1282	F[C@H]1C=2[C@@](C)([C@@]3(F)[C@H](O)C[C@@]4(C)[C@@]5(C(=O)CO)OC(C)(C)O[C@H]5C[C@@H]4[C@H]3C1)C=CC(=O)C=2	NA	1	Roy et al. ACS Omega. 2019; 4(16):16774-16780. DOI: 10.1021/acsomega.9b01512
1283	F[C@H]1C=2[C@@](C)([C@@]3(F)[C@@H](O)C[C@@]4(C)[C@]5(C(O[C@@H](OC(=O)OCC)C)=O)O[C@H](CCC)O[C@@H]5C[C@@H]4[C@H]3C1)C=CC(=O)C=2	NA	1	Roy et al. ACS Omega. 2019; 4(16):16774-16780. DOI: 10.1021/acsomega.9b01512
1284	F[C@H](OC(F)F)C(F)(F)F	7098670	1	Roy et al. ACS Omega. 2019; 4(16):16774-16780. DOI: 10.1021/acsomega.9b01512
1285	F[C@]12[C@H](O)C[C@]3(C)[C@]4(C(=O)COC(=O)C)N=C(C)O[C@H]4C[C@H]3[C@@H]1CCC=1[C@]2(C)C=CC(=O)C=1	NA	1	Roy et al. ACS Omega. 2019; 4(16):16774-16780. DOI: 10.1021/acsomega.9b01512
1286	F[C@]12[C@H](O)C[C@]3(C)[C@@H](C(=O)CO)[C@H](C)C[C@H]3[C@@H]1CCC=1[C@]2(C)C=CC(=O)C=1	93022877	1	Roy et al. ACS Omega. 2019; 4(16):16774-16780. DOI: 10.1021/acsomega.9b01512
1287	F[C@]12[C@H](O)C[C@]3(C)[C@@]4(C(=O)C)OC(C)(C)O[C@H]4C[C@H]3[C@@H]1CCC=1[C@]2(C)C=CC(=O)C=1	NA	1	Roy et al. ACS Omega. 2019; 4(16):16774-16780. DOI: 10.1021/acsomega.9b01512
1288	F[C@]12[C@H](O)C[C@]3(C)[C@@](OC(=O)CCCC)(C(=O)CO)[C@H](C)C[C@H]3[C@@H]1CCC=1[C@]2(C)C=CC(=O)C=1	94826422	1	Roy et al. ACS Omega. 2019; 4(16):16774-16780. DOI: 10.1021/acsomega.9b01512
1289	F[C@]12[C@H](O)C[C@]3(C)[C@@](OC(=O)C)(C(=O)C)CC[C@H]3[C@@H]1C[C@H](C)C=1[C@]2(C)C=CC(=O)C=1	129010271	1	Roy et al. ACS Omega. 2019; 4(16):16774-16780. DOI: 10.1021/acsomega.9b01512
1290	F[C@]12[C@H](O)C[C@]3(C)[C@@](O)(C(=O)COC(=O)C)CC[C@H]3[C@@H]1CCC=1[C@]2(C)CCC(=O)C=1	54331832	1	Roy et al. ACS Omega. 2019; 4(16):16774-16780. DOI: 10.1021/acsomega.9b01512
1291	F[C@]12[C@H](O)C[C@]3(C)[C@@](O)(C(=O)COC(=O)C)CC[C@H]3[C@@H]1CCC=1[C@]2(C)C=CC(=O)C=1	95171181	1	Roy et al. ACS Omega. 2019; 4(16):16774-16780. DOI: 10.1021/acsomega.9b01512
1292	F[C@]12[C@H](O)C[C@]3(C)[C@@](O)(C(=O)COC(=O)C)[C@@H](OC(=O)C)C[C@H]3[C@@H]1CCC=1[C@]2(C)C=CC(=O)C=1	NA	1	Roy et al. ACS Omega. 2019; 4(16):16774-16780. DOI: 10.1021/acsomega.9b01512
1293	F[C@]12[C@H](O)C[C@]3(C)[C@@](O)(C(=O)CO)[C@H](C)C[C@H]3[C@@H]1CC(F)(F)C=1[C@]2(C)C=CC(=O)C=1	NA	1	Roy et al. ACS Omega. 2019; 4(16):16774-16780. DOI: 10.1021/acsomega.9b01512
1294	F[C@]12[C@H](O)C[C@]3(C)[C@@](O)(C(=O)CO)[C@@H](O)C[C@H]3[C@@H]1CCC=1[C@]2(C)C=CC(=O)C=1	93289042	1	Roy et al. ACS Omega. 2019; 4(16):16774-16780. DOI: 10.1021/acsomega.9b01512
1295	F[C@]12[C@H](O)C[C@]3(C)[C@@](O)(C(=O)C)CC[C@H]3[C@@H]1C[C@H](C)C=1[C@]2(C)C=CC(=O)C=1	92835980	1	Roy et al. ACS Omega. 2019; 4(16):16774-16780. DOI: 10.1021/acsomega.9b01512
1296	F[C@]12[C@H](O)C[C@@]3(C)[C@]4(C(=O)COC(=O)[C@H](CNC(=O)c5ccccc5)C)OC(C)(C)O[C@@H]4C[C@@H]3[C@H]1CCC=1[C@]2(C)C=CC(=O)C=1	NA	1	Roy et al. ACS Omega. 2019; 4(16):16774-16780. DOI: 10.1021/acsomega.9b01512
1297	F[C@]12[C@H](O)C[C@@]3(C)[C@]4(C(=O)CO)O[C@@](C)(c5ccccc5)O[C@@H]4C[C@H]3[C@@H]1CCC=1[C@]2(C)C=CC(=O)C=1	NA	1	Roy et al. ACS Omega. 2019; 4(16):16774-16780. DOI: 10.1021/acsomega.9b01512
1298	F[C@]12[C@H](O)C[C@@]3(C)[C@](OC(=O)c4occc4)(C(=O)COC(=O)C)[C@H](C)C[C@H]3[C@@H]1CCC=1[C@]2(C)C=CC(=O)C=1	NA	1	Roy et al. ACS Omega. 2019; 4(16):16774-16780. DOI: 10.1021/acsomega.9b01512
1299	F[C@]12[C@H](O)C[C@@]3(C)[C@](OC(=O)C(C)C)(C(=O)COC(=O)C)[C@H](C)C[C@H]3[C@@H]1CCC=1[C@]2(C)C=CC(=O)C=1	NA	1	Roy et al. ACS Omega. 2019; 4(16):16774-16780. DOI: 10.1021/acsomega.9b01512
1300	F[C@]12[C@H](O)C[C@@]3(C)[C@](O)(C(=O)COC(=O)C)[C@H](C)C[C@H]3[C@@H]1CC(F)(F)C=1[C@]2(C)C=CC(=O)C=1	NA	1	Roy et al. ACS Omega. 2019; 4(16):16774-16780. DOI: 10.1021/acsomega.9b01512
1301	F[C@]12[C@H](O)C[C@@]3(C)[C@](O)(C(=O)C)[C@H](C)C[C@H]3[C@@H]1CCC=1[C@]2(C)C=CC(=O)C=1	NA	1	Roy et al. ACS Omega. 2019; 4(16):16774-16780. DOI: 10.1021/acsomega.9b01512
1302	F[C@@H]1C=2[C@](C)([C@H]3[C@@H](O)C[C@@]4(C)[C@]5(C(=O)CO)OC(C)(C)O[C@@H]5C[C@H]4[C@@H]3C1)C=CC(=O)C=2	NA	1	Roy et al. ACS Omega. 2019; 4(16):16774-16780. DOI: 10.1021/acsomega.9b01512
1303	F[C@@H]1C=2[C@@](C)([C@H]3[C@@H](O)C[C@@]4(C)[C@]5(C(=O)COC(=O)C)OC(C)(C)O[C@@H]5C[C@H]4[C@@H]3C1)C=CC(=O)C=2	NA	1	Roy et al. ACS Omega. 2019; 4(16):16774-16780. DOI: 10.1021/acsomega.9b01512
1304	F[C@@H]1C=2[C@@](C)([C@H]3[C@@H](O)C[C@@]4(C)[C@](O)(C(=O)COC(=O)C)[C@H](C)C[C@H]4[C@@H]3C1)C=CC(=O)C=2	NA	1	Roy et al. ACS Omega. 2019; 4(16):16774-16780. DOI: 10.1021/acsomega.9b01512
1305	F[C@@H]1C=2[C@@](C)([C@H]3[C@@H](O)C[C@@]4(C)[C@](O)(C(=O)CO)[C@H](C)C[C@H]4[C@@H]3C1)C=CC(=O)C=2	NA	1	Roy et al. ACS Omega. 2019; 4(16):16774-16780. DOI: 10.1021/acsomega.9b01512
1306	F[C@@H]1C=2[C@@](C)([C@@H]3[C@H](O)C[C@]4(C)[C@@H](C(=O)C(=O)OCCCC)[C@@H](C)C[C@H]4[C@@H]3C1)C=CC(=O)C=2	NA	1	Roy et al. ACS Omega. 2019; 4(16):16774-16780. DOI: 10.1021/acsomega.9b01512
1307	F[C@@H]1C=2[C@@](C)([C@@H]3[C@H](O)C[C@@]4(C)[C@](OC(=O)CCCC)(C(=O)CO)CC[C@H]4[C@@H]3C1)C=CC(=O)C=2	NA	1	Roy et al. ACS Omega. 2019; 4(16):16774-16780. DOI: 10.1021/acsomega.9b01512
1308	F[C@@H]1C=2[C@@](C)([C@@]3(F)[C@H](O)C[C@]4(C)[C@@H](C(=O)COC(=O)C(C)(C)C)[C@@H](C)C[C@H]4[C@@H]3C1)C=CC(=O)C=2	NA	1	Roy et al. ACS Omega. 2019; 4(16):16774-16780. DOI: 10.1021/acsomega.9b01512
1309	F[C@@H]1C=2[C@@](C)([C@@]3(F)[C@H](O)C[C@]4(C)[C@@]5(C(=O)COC(=O)C)OC(C)(C)O[C@@H]5C[C@H]4[C@@H]3C1)C=CC(=O)C=2	NA	1	Roy et al. ACS Omega. 2019; 4(16):16774-16780. DOI: 10.1021/acsomega.9b01512
1310	F[C@@H]1C=2[C@@](C)([C@@]3(F)[C@H](O)C[C@]4(C)[C@@]5(C(=O)CO)O[C@@H](CCC)O[C@H]5C[C@H]4[C@@H]3C1)CCC(=O)C=2	NA	1	Roy et al. ACS Omega. 2019; 4(16):16774-16780. DOI: 10.1021/acsomega.9b01512
1311	F[C@@H]1C=2[C@@](C)([C@@]3(F)[C@H](O)C[C@]4(C)[C@@](OC(=O)C)(C(=O)COC(=O)C)[C@@H](C)C[C@H]4[C@@H]3C1)C=CC(=O)C=2	NA	1	Roy et al. ACS Omega. 2019; 4(16):16774-16780. DOI: 10.1021/acsomega.9b01512
1312	F[C@@H]1C=2[C@@](C)([C@@]3(F)[C@H](O)C[C@]4(C)[C@@](O)(C(=O)CO)[C@@H](O)C[C@H]4[C@@H]3C1)C=CC(=O)C=2	139025299	1	Roy et al. ACS Omega. 2019; 4(16):16774-16780. DOI: 10.1021/acsomega.9b01512
1313	F[C@@]12[C@H](O)C[C@]3(C)[C@@]4(C(=O)COC(=O)c5oc6c(c5)cccc6)OC(C)(C)O[C@H]4C[C@@H]3[C@H]1CC=1[C@@]2(C)C=CC(=O)C=1	NA	1	Roy et al. ACS Omega. 2019; 4(16):16774-16780. DOI: 10.1021/acsomega.9b01512
1314	F[C@@]12[C@@H](O)C[C@]3(C)[C@@]4(C(=O)COC(=O)CC(C)(C)C)OC(C)(C)O[C@H]4C[C@@H]3[C@H]1CC=1[C@@]2(C)C=CC(=O)C=1	NA	1	Roy et al. ACS Omega. 2019; 4(16):16774-16780. DOI: 10.1021/acsomega.9b01512
1315	F[C@@]12[C@@H](O)C[C@]3(C)[C@@]4(C(=O)CO)OC(CC)(CC)O[C@H]4C[C@@H]3[C@H]1CCC=1[C@@]2(C)C=CC(=O)C=1	NA	1	Roy et al. ACS Omega. 2019; 4(16):16774-16780. DOI: 10.1021/acsomega.9b01512
1316	F[C@@]12[C@@H](O)C[C@]3(C)[C@@]4(C(=O)CO)OC(C)(C)O[C@H]4C[C@@H]3[C@H]1CC[C@H]1[C@@]2(C)CCC(=O)C1	NA	1	Roy et al. ACS Omega. 2019; 4(16):16774-16780. DOI: 10.1021/acsomega.9b01512
1317	F[C@@]12[C@@H](O)C[C@]3(C)[C@@]4(C(=O)CO)O[C@@H](C=C)O[C@H]4C[C@H]3[C@@H]1CCC=1[C@@]2(C)C=CC(=O)C=1	NA	1	Roy et al. ACS Omega. 2019; 4(16):16774-16780. DOI: 10.1021/acsomega.9b01512
1318	F[C@@]12[C@@H](O)C[C@]3(C)[C@@](OC(=O)CC)(C(=O)COC)[C@H](C)C[C@@H]3[C@H]1CCC=1[C@@]2(C)C=CC(=O)C=1	NA	1	Roy et al. ACS Omega. 2019; 4(16):16774-16780. DOI: 10.1021/acsomega.9b01512
1319	F[C@@]12[C@@H](O)C[C@]3(C)[C@@](OC(=O)CC)(C(=O)COC(=O)CC)[C@H](C)C[C@@H]3[C@H]1CCC=1[C@@]2(C)C=CC(=O)C=1	NA	1	Roy et al. ACS Omega. 2019; 4(16):16774-16780. DOI: 10.1021/acsomega.9b01512
1320	F[C@@]12[C@@H](O)C[C@]3(C)[C@@](OC(=O)c4ccccc4)(C(=O)CO)[C@@H](C)C[C@@H]3[C@H]1CCC=1[C@@]2(C)C=CC(=O)C=1	NA	1	Roy et al. ACS Omega. 2019; 4(16):16774-16780. DOI: 10.1021/acsomega.9b01512
1321	F[C@@]12[C@@H](O)C[C@]3(C)[C@@](O)(C(=O)[C@@H](OC(=O)C)C)CC[C@@H]3[C@H]1CCC=1[C@@]2(C)C=CC(=O)C=1	NA	1	Roy et al. ACS Omega. 2019; 4(16):16774-16780. DOI: 10.1021/acsomega.9b01512
1322	F[C@@]12[C@@H](O)C[C@@]3(C)[C@]4(C(=O)CO)[C@H](C[C@H]3[C@@H]1CCC=1[C@@]2(C)C=CC(=O)C=1)Cc1c(cccc1)C4	NA	1	Roy et al. ACS Omega. 2019; 4(16):16774-16780. DOI: 10.1021/acsomega.9b01512
1323	F[C@@]12[C@@H](O)C[C@@]3(C)[C@](O)(C(=O)COC(=O)C)[C@H](C)C[C@@H]3[C@H]1CCC=1[C@@]2(C)C=CC(=O)C=1	NA	1	Roy et al. ACS Omega. 2019; 4(16):16774-16780. DOI: 10.1021/acsomega.9b01512
1324	F[C@@]12[C@@H](O)C[C@@]3(C)[C@](O)(C(=O)CO)CC[C@@H]3[C@H]1CCC=1[C@@]2(C)CCC(=O)C=1	NA	1	Roy et al. ACS Omega. 2019; 4(16):16774-16780. DOI: 10.1021/acsomega.9b01512
1325	F[C@@]12[C@@H](O)C[C@@]3(C)[C@](O)(C(=O)CO)CC[C@@H]3[C@H]1CCC=1[C@@]2(C)C=CC(=O)C=1	NA	1	Roy et al. ACS Omega. 2019; 4(16):16774-16780. DOI: 10.1021/acsomega.9b01512
1326	F[C@@]12[C@@H](O)C[C@@]3(C)[C@](O)(C(=O)CO)C(=C)C[C@@H]3[C@H]1CCC=1[C@@]2(C)C=CC(=O)C=1	NA	1	Roy et al. ACS Omega. 2019; 4(16):16774-16780. DOI: 10.1021/acsomega.9b01512
1327	F[C@@]12[C@@H](O)C[C@@]3(C)[C@@]4(C(=O)COC(=O)C)OC5(O[C@@H]4C[C@H]3[C@@H]1CCC=1[C@@]2(C)C=CC(=O)C=1)CCCC5	NA	1	Roy et al. ACS Omega. 2019; 4(16):16774-16780. DOI: 10.1021/acsomega.9b01512
1328	F[C@@]12[C@@H](O)C[C@@]3(C)[C@@]4(C(=O)CO)OC(C)(C)O[C@H]4C[C@@H]3[C@H]1CCC=1[C@@]2(C)C=CC(=O)C=1	NA	1	Roy et al. ACS Omega. 2019; 4(16):16774-16780. DOI: 10.1021/acsomega.9b01512
1329	F[C@@]12[C@@H](O)C[C@@]3(C)[C@@](C(=O)CO)(C)[C@H](C)C[C@@H]3[C@H]1CCC=1[C@@]2(C)C=CC(=O)C=1	NA	1	Roy et al. ACS Omega. 2019; 4(16):16774-16780. DOI: 10.1021/acsomega.9b01512
1330	F[C@@]1(C)C(=O)[C@@H](C)[C@H](O)[C@](O)(C)[C@H](CC)OC(=O)[C@H](C)[C@H](O[C@H]2O[C@@H](C)[C@H](O)[C@@](OC)(C)C2)[C@@H](C)[C@H](O[C@H]2[C@@H](O)[C@@H](N(C)C)C[C@H](C)O2)[C@](O)(C)C1	NA	0	Roy et al. ACS Omega. 2019; 4(16):16774-16780. DOI: 10.1021/acsomega.9b01512
1331	F/C=C(\CN)/CCc1ccc(F)cc1	6504737	1	Roy et al. ACS Omega. 2019; 4(16):16774-16780. DOI: 10.1021/acsomega.9b01512
1332	CSCCC(NC(C)=O)C(=O)Oc1ccc(NC(C)=O)cc1	10041933	1	Zhao et al. J Chem Inf Model. 2007;47(1):170–175. DOI:10.1021/ci600312d
1333	CSc4ccc3Sc1ccccc1N(CCC2CCCCN2C)c3c4	5452	1	Zhao et al. J Chem Inf Model. 2007;47(1):170–175. DOI:10.1021/ci600312d
1334	CSc3ccc2Sc1ccccc1N(CC(C)CN(C)C)c2c3	26430	1	Zhao et al. J Chem Inf Model. 2007;47(1):170–175. DOI:10.1021/ci600312d
1335	CSc1ccc2c(c1)C(Cc1ccccc1S2)N1CCN(C)CC1	4106	1	Zhao et al. J Chem Inf Model. 2007;47(1):170–175. DOI:10.1021/ci600312d
1336	CSc1c(Cl)nc(NC(C)C)nc1N2CCN(C)CC2	68725	1	Zhao et al. J Chem Inf Model. 2007;47(1):170–175. DOI:10.1021/ci600312d
1337	CSC(=O)C3(OC(C)=O)C(C)CC4C2CCC1=CC(=O)C=CC1(C)C2(F)C(O)CC34C	13488893	1	Zhao et al. J Chem Inf Model. 2007;47(1):170–175. DOI:10.1021/ci600312d
1338	CSC(=O)C3(O)C(C)CC4C2CCC1=CC(=O)C=CC1(C)C2(F)C(O)CC34C	73215372	1	Zhao et al. J Chem Inf Model. 2007;47(1):170–175. DOI:10.1021/ci600312d
1339	CS(=O)(=O)OCCCCOS(C)(=O)=O	2478	1	Zhao et al. J Chem Inf Model. 2007;47(1):170–175. DOI:10.1021/ci600312d
1340	CS(=O)(=O)c4ccc3Sc1ccccc1N(CCCN2CCC(CC2)C(N)=O)c3c4	26388	1	Zhao et al. J Chem Inf Model. 2007;47(1):170–175. DOI:10.1021/ci600312d
1341	CS(=O)(=O)c1ccc(cc1)C(O)C(CO)NC(=O)C(Cl)Cl	5433	1	Zhao et al. J Chem Inf Model. 2007;47(1):170–175. DOI:10.1021/ci600312d
1342	CS(=O)(=O)c1ccc(cc1)C(O)C(CF)NC(=O)C(Cl)Cl	5201447	1	Zhao et al. J Chem Inf Model. 2007;47(1):170–175. DOI:10.1021/ci600312d
1343	CP(C)(=O)CN2C(=O)CN=C(c1ccccc1)c3cc(Cl)ccc23	37114	1	Zhao et al. J Chem Inf Model. 2007;47(1):170–175. DOI:10.1021/ci600312d
1344	CON=CC1=CCCN(C)C1	60862	1	Zhao et al. J Chem Inf Model. 2007;47(1):170–175. DOI:10.1021/ci600312d
1345	CON=C(C1=CSC(=N1)N)C(=O)NC2C3N(C2=O)C(=C(CS3)C=CSC4=NNC(=O)C(=O)N4CC=O)C(=O)O	6537430	0	Shen et al. J Chem Inf Model. 2010;50(6):1034-1041. DOI: 10.1021/ci100104j
1346	CON=C(C(=O)NC2C1SCC=C(N1C2=O)C(O)=O)c3csc(=N)[nH]3	2655	0	Zhao et al. J Chem Inf Model. 2007;47(1):170–175. DOI:10.1021/ci600312d
1347	CON=C(C(=O)NC2C1SCC(=C(N1C2=O)C(O)=O)CSc3nnnn3C)c4csc(N)n4	2624	0	Zhao et al. J Chem Inf Model. 2007;47(1):170–175. DOI:10.1021/ci600312d
1348	CON=C(C(=O)NC2C1SCC(=C(N1C2=O)C(O)=O)CSc3nc(C)c(CC(O)=O)s3)c4csc(N)n4	2628	0	Zhao et al. J Chem Inf Model. 2007;47(1):170–175. DOI:10.1021/ci600312d
1349	CON=C(C(=O)NC2C1SCC(=C(N1C2=O)C(O)=O)CSc3nc(=O)c(=O)[nH]n3C)c4csc(N)n4	2657	0	Zhao et al. J Chem Inf Model. 2007;47(1):170–175. DOI:10.1021/ci600312d
1350	CON=C(C(=O)NC2C1SCC(=C(N1C2=O)C(O)=O)CSc3cnns3)c4csc(N)n4	53395236	0	Zhao et al. J Chem Inf Model. 2007;47(1):170–175. DOI:10.1021/ci600312d
1351	CON=C(C(=O)NC2C1SCC(=C(N1C2=O)C(O)=O)CSC(=O)c3ccco3)c4csc(N)n4	5073094	0	Zhao et al. J Chem Inf Model. 2007;47(1):170–175. DOI:10.1021/ci600312d
1352	CON=C(C(=O)NC2C1SCC(=C(N1C2=O)C(O)=O)COC(N)=O)c3ccco3	2659	0	Zhao et al. J Chem Inf Model. 2007;47(1):170–175. DOI:10.1021/ci600312d
1353	CON=C(C(=O)NC2C1SCC(=C(N1C2=O)C(O)=O)COC(C)=O)c3csc(N)n3	2632	0	Zhao et al. J Chem Inf Model. 2007;47(1):170–175. DOI:10.1021/ci600312d
1354	CON=C(C(=O)NC2C1SCC(=C(N1C2=O)C(O)=O)COC(C)=O)c3ccco3	76376633	0	Zhao et al. J Chem Inf Model. 2007;47(1):170–175. DOI:10.1021/ci600312d
1355	CON=C(C(=O)NC2C1SCC(=C(N1C2=O)C(O)=O)Cn3nnc(C)n3)c4csc(N)n4	54486399	0	Zhao et al. J Chem Inf Model. 2007;47(1):170–175. DOI:10.1021/ci600312d
1356	CON=C(C(=O)NC2C1SCC(=C(N1C2=O)C(O)=O)C=CSc3n[nH]c(=O)c(=O)n3CC=O)c4csc(N)n4	54434665	0	Zhao et al. J Chem Inf Model. 2007;47(1):170–175. DOI:10.1021/ci600312d
1357	CON=C(C(=O)NC2C1SCC(=C(N1C2=O)C(O)=O)C=Cc3scnc3C)c4csc(N)n4	53432469	0	Zhao et al. J Chem Inf Model. 2007;47(1):170–175. DOI:10.1021/ci600312d
1358	CON=C(C(=O)NC2C1SCC(=C(N1C2=O)C(O)=O)C)c3csc(N)n3	53396029	0	Zhao et al. J Chem Inf Model. 2007;47(1):170–175. DOI:10.1021/ci600312d
1359	CON=C(C(=O)NC2C1SCC(=C(N1C2=O)C(=O)OC(C)OC(C)=O)COC(N)=O)c3ccco3	3379942	0	Zhao et al. J Chem Inf Model. 2007;47(1):170–175. DOI:10.1021/ci600312d
1360	CON=C(C(=O)NC1C2SCC=C(N2C1=O)C(=O)OCOC(=O)C(C)(C)C)c1csc(n1)NC(=O)C(C)N	53394888	0	Zhao et al. J Chem Inf Model. 2007;47(1):170–175. DOI:10.1021/ci600312d
1361	CON=C(C(=O)NC1C2SCC(=C(N2C1=O)C(=O)OC(C)OC(=O)C(C)(C)OC)COC(N)=O)c1occc1	4630416	0	Zhao et al. J Chem Inf Model. 2007;47(1):170–175. DOI:10.1021/ci600312d
1362	CON=C(C(=O)NC1C2N(C1=O)C(=C(COC(C)=O)CS2=O)C(O)=O)c3csc(N)n3	78071565	0	Zhao et al. J Chem Inf Model. 2007;47(1):170–175. DOI:10.1021/ci600312d
1363	CON=C(C(=O)NC1C(C)N(OCC(O)=O)C1=O)c2csc(N)n2	3047808	0	Zhao et al. J Chem Inf Model. 2007;47(1):170–175. DOI:10.1021/ci600312d
1364	CON=C(C(=O)NC1C(C)N(OCC(=O)OCC(=O)OC(C)(C)C)C1=O)c2csc(N)n2	78393507	0	Zhao et al. J Chem Inf Model. 2007;47(1):170–175. DOI:10.1021/ci600312d
1365	CON=C(C#N)C1CN2CCC1CC2	53930639	1	Zhao et al. J Chem Inf Model. 2007;47(1):170–175. DOI:10.1021/ci600312d
1366	CON=C(C#N)C1CN2CCC1CC2	9577995	1	Shen et al. J Chem Inf Model. 2010;50(6):1034-1041. DOI: 10.1021/ci100104j
1367	COCOC(=O)C1N4C(SC1(C)C)C(N2C(=O)C(NC2(C)C)c3ccccc3)C4=O	60885	0	Zhao et al. J Chem Inf Model. 2007;47(1):170–175. DOI:10.1021/ci600312d
1368	COCOC(=O)C1N4C(SC1(C)C)C(N2C(=O)C(NC2(C)C)c3ccc(O)cc3)C4=O	49808	0	Zhao et al. J Chem Inf Model. 2007;47(1):170–175. DOI:10.1021/ci600312d
1369	COCOC(=O)[C@@]4([H])N3C(=O)[C@@]([H])(N1C(=O)[C@@]([H])(NC1(C)C)C2=CC=CC=C2)[C@@]3([H])[S]C4(C)C	65429	0	Shen et al. J Chem Inf Model. 2010;50(6):1034-1041. DOI: 10.1021/ci100104j
1370	COCN2C(=O)CN=C(c1ccccc1)c3cc(ccc23)N(=O)=O	65764	1	Zhao et al. J Chem Inf Model. 2007;47(1):170–175. DOI:10.1021/ci600312d
1371	COCCN3CC[C@@]12C=4C=5O[C@@]1([H])C(=O)CC[C@@]2(O)[C@@]3([H])CC=4C=CC=5O	5491906	1	Shen et al. J Chem Inf Model. 2010;50(6):1034-1041. DOI: 10.1021/ci100104j
1372	COCCN1CCC24C3Oc5c(O)ccc(CC1C2(O)CCC3=O)c45	13247566	1	Zhao et al. J Chem Inf Model. 2007;47(1):170–175. DOI:10.1021/ci600312d
1373	COCCCCC(=NOCCN)c1ccc(Cl)cc1	68717	1	Zhao et al. J Chem Inf Model. 2007;47(1):170–175. DOI:10.1021/ci600312d
1374	COCCCCC(=NOCCN)c1ccc(cc1)C(F)(F)F	3404	1	Zhao et al. J Chem Inf Model. 2007;47(1):170–175. DOI:10.1021/ci600312d
1375	COCCCC/C(=N/OCCN)C1=CC=C(C=C1)C([F])([F])[F]	5324346	1	Shen et al. J Chem Inf Model. 2010;50(6):1034-1041. DOI: 10.1021/ci100104j
1376	COCCc1ccc(OCC(O)CNC(C)C)cc1	4171	1	Zhao et al. J Chem Inf Model. 2007;47(1):170–175. DOI:10.1021/ci600312d
1377	COCC3CN=C(c1ccccc1Cl)c2cc(Br)ccc2N3C	71272	1	Zhao et al. J Chem Inf Model. 2007;47(1):170–175. DOI:10.1021/ci600312d
1378	COCc3c(ncc4[nH]c2cccc(Oc1ccc(Cl)cc1)c2c34)C(=O)OC(C)C	219095	1	Zhao et al. J Chem Inf Model. 2007;47(1):170–175. DOI:10.1021/ci600312d
1379	COCC1CN(C(=O)O1)c2ccc(OCCC(O)C(F)(F)F)cc2	5259655	1	Zhao et al. J Chem Inf Model. 2007;47(1):170–175. DOI:10.1021/ci600312d
1380	COCc1c(nc(C(C)C)c(C=CC(O)CC(O)CC(O)=O)c1c2ccc(F)cc2)C(C)C	2676	1	Zhao et al. J Chem Inf Model. 2007;47(1):170–175. DOI:10.1021/ci600312d
1381	COCC1=C(N3C(SC1)C(NC(=O)C(=NOC)c2csc(N)n2)C3=O)C(O)=O	54547	0	Zhao et al. J Chem Inf Model. 2007;47(1):170–175. DOI:10.1021/ci600312d
1382	COCC1=C(N3C(SC1)C(NC(=O)C(=NO)c2csc(N)n2)C3=O)C(O)=O	85037940	0	Zhao et al. J Chem Inf Model. 2007;47(1):170–175. DOI:10.1021/ci600312d
1383	COCC=1C[S][C@@]2([H])N(C=1C(O)=O)C(=O)[C@@]2([H])NC(=O)C(=NO)C3=C[S]C(N)=N3	9571072	0	Shen et al. J Chem Inf Model. 2010;50(6):1034-1041. DOI: 10.1021/ci100104j
1384	COCC(=O)OC4(CCN(C)CCCc2nc1ccccc1[nH]2)CCc3cc(F)ccc3C4C(C)C	5230270	0	Zhao et al. J Chem Inf Model. 2007;47(1):170–175. DOI:10.1021/ci600312d
1385	COCC(=O)O[C@@]4(CCN(C)CCC/C2=N/C1=CC=CC=C1N2)CCC3=CC([F])=CC=C3[C@@]4([H])C(C)(C)[H]	60663	0	Shen et al. J Chem Inf Model. 2010;50(6):1034-1041. DOI: 10.1021/ci100104j
1386	COCC(=O)N(C1CCN(CC1)CCc2ccccc2)c3ccccc3F	60575	1	Zhao et al. J Chem Inf Model. 2007;47(1):170–175. DOI:10.1021/ci600312d
1387	COC6C=COC5(C)Oc4c(C)c(O)c3C(=O)C(=C2NC1(CCN(CC1)CC(C)C)N=C2c3c4C5=O)NC(=O)C(=CC=CC(C)C(O)C(C)C(O)C(C)C(OC(C)=O)C6C)C	136968143	0	Zhao et al. J Chem Inf Model. 2007;47(1):170–175. DOI:10.1021/ci600312d
1388	COc5cccc6C(=O)c4c(O)c3CC(O)(CC(OC2CC(N)C(OC1CCCCO1)C(C)O2)c3c(O)c4C(=O)c56)C(=O)CO	4844	0	Zhao et al. J Chem Inf Model. 2007;47(1):170–175. DOI:10.1021/ci600312d
1389	COc5ccc(CCN1CCC(CC1)Nc3nc2ccccc2n3Cc4ccc(F)cc4)cc5	2247	0	Zhao et al. J Chem Inf Model. 2007;47(1):170–175. DOI:10.1021/ci600312d
1390	COC5CC4CN3CCc1c([nH]c2cc(OC)ccc12)C3CC4C(C5OC)C(=O)OC	14443	1	Zhao et al. J Chem Inf Model. 2007;47(1):170–175. DOI:10.1021/ci600312d
1391	COC5C(CC4CN3CCc1c([nH]c2ccccc12)C3CC4C5C(=O)OC)OC(=O)c6cc(OC)c(OC)c(OC)c6	518697	1	Zhao et al. J Chem Inf Model. 2007;47(1):170–175. DOI:10.1021/ci600312d
1392	COC5C(CC4CN3CCc1c([nH]c2ccc(Cl)cc12)C3CC4C5C(=O)OC)OC(=O)c6cc(OC)c(OC)c(OC)c6	23447032	1	Zhao et al. J Chem Inf Model. 2007;47(1):170–175. DOI:10.1021/ci600312d
1393	COC5C(CC4CN3CCc1c([nH]c2cc(OC)ccc12)C3CC4C5OC(C)=O)OC(=O)c6cc(OC)c(OC)c(OC)c6	72964111	1	Zhao et al. J Chem Inf Model. 2007;47(1):170–175. DOI:10.1021/ci600312d
1394	COc4cccc5C(=O)c3c(O)c2CC(O)(CC(OC1CC(NC(=O)C(N)CC(C)C)C(O)C(C)O1)c2c(O)c3C(=O)c45)C(=O)CO	3608363	0	Zhao et al. J Chem Inf Model. 2007;47(1):170–175. DOI:10.1021/ci600312d
1395	COc4cccc5C(=O)c3c(O)c2CC(O)(CC(OC1CC(N)CC(C)O1)c2c(O)c3C(=O)c45)C(=O)CO	430021	0	Zhao et al. J Chem Inf Model. 2007;47(1):170–175. DOI:10.1021/ci600312d
1396	COc4cccc5C(=O)c3c(O)c2CC(O)(CC(OC1CC(N)C(O)C(C)O1)c2c(O)c3C(=O)c45)C(C)=O	2958	0	Zhao et al. J Chem Inf Model. 2007;47(1):170–175. DOI:10.1021/ci600312d
1397	COc4cccc5C(=O)c3c(O)c2CC(O)(CC(OC1CC(N)C(O)C(C)O1)c2c(O)c3C(=O)c45)C(C)=NNC(=O)c6ccccc6	424364	0	Zhao et al. J Chem Inf Model. 2007;47(1):170–175. DOI:10.1021/ci600312d
1398	COc4cccc5C(=O)c3c(O)c2CC(O)(CC(OC1CC(N)C(O)C(C)O1)c2c(O)c3C(=O)c45)C(=O)CO	1691	0	Zhao et al. J Chem Inf Model. 2007;47(1):170–175. DOI:10.1021/ci600312d
1399	COc4cccc(C(=O)NC1CC2CCC(C1)N2Cc3ccccc3)c4OC	3065828	1	Zhao et al. J Chem Inf Model. 2007;47(1):170–175. DOI:10.1021/ci600312d
1400	COc4ccc3Sc1ccccc1N(CCC2CCCCN2C)c3c4	65612	1	Zhao et al. J Chem Inf Model. 2007;47(1):170–175. DOI:10.1021/ci600312d
1401	COc4ccc3Sc1ccccc1N(CC(C)CN2CCC(O)CC2)c3c4	62870	1	Zhao et al. J Chem Inf Model. 2007;47(1):170–175. DOI:10.1021/ci600312d
1402	COc4ccc3Oc1ccccc1C=C(N2CCN(C)CC2)c3c4	32226	1	Zhao et al. J Chem Inf Model. 2007;47(1):170–175. DOI:10.1021/ci600312d
1403	COc4ccc3n1CCN(C)C2=NCCc(c12)c3c4	68713	1	Zhao et al. J Chem Inf Model. 2007;47(1):170–175. DOI:10.1021/ci600312d
1404	COc4ccc3CC2C1CCCCC1(CCN2C)c3c4	3008	1	Zhao et al. J Chem Inf Model. 2007;47(1):170–175. DOI:10.1021/ci600312d
1405	COc4ccc3CC1N(C)CCC2(CC(O)CCC12O)c3c4OC	4637	1	Zhao et al. J Chem Inf Model. 2007;47(1):170–175. DOI:10.1021/ci600312d
1406	COc4ccc3c(C2CCN(CCCC(=O)c1ccc(F)cc1)CC2)c(C)[nH]c3c4	172296	1	Zhao et al. J Chem Inf Model. 2007;47(1):170–175. DOI:10.1021/ci600312d
1407	COc4cc3CC(CC1CCN(CC1)Cc2ccccc2)C(=O)c3cc4OC	3152	1	Zhao et al. J Chem Inf Model. 2007;47(1):170–175. DOI:10.1021/ci600312d
1408	COc4cc3[nH]c(C)c(CCN1CCN(CC1)c2ccccc2OC)c3cc4OC	32345	1	Zhao et al. J Chem Inf Model. 2007;47(1):170–175. DOI:10.1021/ci600312d
1409	COc4cc3[nH]c(C)c(CCN1CCN(CC1)c2ccccc2)c3cc4OC	4640	1	Zhao et al. J Chem Inf Model. 2007;47(1):170–175. DOI:10.1021/ci600312d
1410	COC4C(OC(N)=O)C(O)C(Oc3ccc2c(O)c(NC(=O)c1ccc(O)c(CC=C(C)C)c1)c(=O)oc2c3C)OC4(C)C	54678491	0	Zhao et al. J Chem Inf Model. 2007;47(1):170–175. DOI:10.1021/ci600312d
1411	COC3OC2OC4(CN1CCCCC1)C(O)CC(C2C)C34	23447007	1	Zhao et al. J Chem Inf Model. 2007;47(1):170–175. DOI:10.1021/ci600312d
1412	COc3cccc4OCC(CCCNCCCCN2C(=O)CC1(CCCC1)CC2=O)Cc34	69889524	1	Zhao et al. J Chem Inf Model. 2007;47(1):170–175. DOI:10.1021/ci600312d
1413	COc3ccc2Sc1ccccc1N(CCCN(C)C)c2c3	18847	1	Zhao et al. J Chem Inf Model. 2007;47(1):170–175. DOI:10.1021/ci600312d
1414	COc3ccc2Sc1ccccc1N(CC(C)CN(C)C)c2c3	3916	1	Zhao et al. J Chem Inf Model. 2007;47(1):170–175. DOI:10.1021/ci600312d
1415	COc3ccc2Sc1ccccc1C(O)(CCCN(C)C)c2c3	71195	1	Zhao et al. J Chem Inf Model. 2007;47(1):170–175. DOI:10.1021/ci600312d
1416	COc3ccc2Oc1ccccc1C(=CCCN(C)C)c2c3	208840	1	Zhao et al. J Chem Inf Model. 2007;47(1):170–175. DOI:10.1021/ci600312d
1417	COc3ccc2nccc(CCCC1CCNCC1C=C)c2c3	51669	1	Zhao et al. J Chem Inf Model. 2007;47(1):170–175. DOI:10.1021/ci600312d
1418	COc3ccc2n(C(=O)c1ccc(Cl)cc1)c(C)c(CC(O)=O)c2c3	3715	1	Zhao et al. J Chem Inf Model. 2007;47(1):170–175. DOI:10.1021/ci600312d
1419	COc3ccc(OCC1CN(C)CCC1c2ccccc2)cc3	43103	1	Zhao et al. J Chem Inf Model. 2007;47(1):170–175. DOI:10.1021/ci600312d
1420	COc3ccc(Cn1c(C)c(CCN)c2cc(O)ccc12)cc3	216254	1	Zhao et al. J Chem Inf Model. 2007;47(1):170–175. DOI:10.1021/ci600312d
1421	COc3ccc(CCN1CCN(CC1)c2ccccc2Cl)cc3OC	3064105	1	Zhao et al. J Chem Inf Model. 2007;47(1):170–175. DOI:10.1021/ci600312d
1422	COc3cc2CCN1CC(CC(C)C)C(=O)CC1c2cc3OC	6018	1	Zhao et al. J Chem Inf Model. 2007;47(1):170–175. DOI:10.1021/ci600312d
1423	COc3cc2CCC(NC(C)=O)c1cc(=O)c(OC)ccc1c2c(OC)c3OC	2833	0	Zhao et al. J Chem Inf Model. 2007;47(1):170–175. DOI:10.1021/ci600312d
1424	COc3cc2CC(=NN=C(c1cccc(Cl)c1)c2cc3OC)C	71257	1	Zhao et al. J Chem Inf Model. 2007;47(1):170–175. DOI:10.1021/ci600312d
1425	COc3cc2CC(=NN=C(c1ccc(N)cc1)c2cc3OC)C	65875	1	Zhao et al. J Chem Inf Model. 2007;47(1):170–175. DOI:10.1021/ci600312d
1426	COc3cc(NCc2ccc1nc(N)nc(N)c1c2C)cc(OC)c3OC	5583	1	Zhao et al. J Chem Inf Model. 2007;47(1):170–175. DOI:10.1021/ci600312d
1427	COC3(NC(=O)Cc1cccs1)C2SCC(=C(N2C3=O)C(O)=O)COC(N)=O	2638	0	Zhao et al. J Chem Inf Model. 2007;47(1):170–175. DOI:10.1021/ci600312d
1428	COC3(NC(=O)C1SC(S1)=C(C(N)=O)C(O)=O)C2SCC(=C(N2C3=O)C(O)=O)CSc4nnnn4C	4630412	0	Zhao et al. J Chem Inf Model. 2007;47(1):170–175. DOI:10.1021/ci600312d
1429	COC3(NC(=O)C1SC(S1)=C(C#N)C(O)=O)C2SCC(=C(N2C3=O)C(O)=O)CSc4nnnn4C	NA	0	Zhao et al. J Chem Inf Model. 2007;47(1):170–175. DOI:10.1021/ci600312d
1430	COC3(NC(=O)C(C(O)=O)c1ccsc1)C2SC(C)(C)C(N2C3=O)C(O)=O	13712660	0	Zhao et al. J Chem Inf Model. 2007;47(1):170–175. DOI:10.1021/ci600312d
1431	COC3(NC(=O)C(C(O)=O)c1ccc(O)cc1)C2OCC(=C(N2C3=O)C(O)=O)CSc4nnnn4C	3889	0	Zhao et al. J Chem Inf Model. 2007;47(1):170–175. DOI:10.1021/ci600312d
1432	COC2CN(CCCOc1ccc(F)cc1)CCC2NC(=O)c3cc(Cl)c(N)cc3OC	2769	1	Zhao et al. J Chem Inf Model. 2007;47(1):170–175. DOI:10.1021/ci600312d
1433	COC2CCCC3C1C(C(C)O)C(=O)N1C(=C23)C=O	NA	0	Zhao et al. J Chem Inf Model. 2007;47(1):170–175. DOI:10.1021/ci600312d
1434	COc2ccc3CN(C)CCC14C=CC(O)CC1Oc2c34	3449	1	Zhao et al. J Chem Inf Model. 2007;47(1):170–175. DOI:10.1021/ci600312d
1435	COc2ccc3CC6C4CCC(OC(=O)c1cccnc1)C5Oc2c3C45CCN6C	522741	1	Zhao et al. J Chem Inf Model. 2007;47(1):170–175. DOI:10.1021/ci600312d
1436	COc2ccc1C(OC(=O)c1c2OC)C4N(C)CCc5cc3OCOc3c(OC)c45	4544	1	Zhao et al. J Chem Inf Model. 2007;47(1):170–175. DOI:10.1021/ci600312d
1437	COc2ccc1C(CN(C)Cc1c2)c3ccc(Cl)c(Cl)c3	68871	1	Zhao et al. J Chem Inf Model. 2007;47(1):170–175. DOI:10.1021/ci600312d
1438	COc2ccc1[nH]c(nc1c2)S(=O)Cc3ncc(C)c(OC)c3C	4594	0	Zhao et al. J Chem Inf Model. 2007;47(1):170–175. DOI:10.1021/ci600312d
1439	COc2ccc(CN(CCN(C)C)c1ccccn1)cc2	4992	1	Zhao et al. J Chem Inf Model. 2007;47(1):170–175. DOI:10.1021/ci600312d
1440	COc2ccc(CCN(C)CCCC(C#N)(C(C)C)c1ccc(OC)c(OC)c1)cc2OC	2520	1	Zhao et al. J Chem Inf Model. 2007;47(1):170–175. DOI:10.1021/ci600312d
1441	COc2cc3CCN(C)C4CC1(C=CC(=O)C=C1)c(c2O)c34	65631	1	Zhao et al. J Chem Inf Model. 2007;47(1):170–175. DOI:10.1021/ci600312d
1442	COc2cc1oc(=O)c(C)c(C)c1cc2OCCCN3CCN(CC3)c4ccccc4OC	208923	1	Zhao et al. J Chem Inf Model. 2007;47(1):170–175. DOI:10.1021/ci600312d
1443	COc2cc1CC(OS(=O)(=O)c1cc2OC)C(=O)NC(C)CC(C)(C)N(C)C	65789	1	Zhao et al. J Chem Inf Model. 2007;47(1):170–175. DOI:10.1021/ci600312d
1444	COc2cc(Cc1cnc(N)nc1N)cc(OC)c2OC	5578	1	Zhao et al. J Chem Inf Model. 2007;47(1):170–175. DOI:10.1021/ci600312d
1445	COc2cc(cc(C(=O)NCC1CCCN1CC=C)c2OC)S(N)(=O)=O	47979	1	Zhao et al. J Chem Inf Model. 2007;47(1):170–175. DOI:10.1021/ci600312d
1446	COc2cc(C=CC(=O)N1CCCCCCC1)cc(OC)c2OC	193983	1	Zhao et al. J Chem Inf Model. 2007;47(1):170–175. DOI:10.1021/ci600312d
1447	COc2cc(Br)c1oc(cc1c2)C3CCNCC3	44571	1	Zhao et al. J Chem Inf Model. 2007;47(1):170–175. DOI:10.1021/ci600312d
1448	COC2C(O)C(N)C(OC1OC(CCC1N)C(C)N)C(O)C2N(C)C(=O)CN	2248	0	Zhao et al. J Chem Inf Model. 2007;47(1):170–175. DOI:10.1021/ci600312d
1449	COC23C1NC1CN2C4=C(C3COC(N)=O)C(=O)C(=C(C)C4=O)N	351727	0	Zhao et al. J Chem Inf Model. 2007;47(1):170–175. DOI:10.1021/ci600312d
1450	COC2(NC(=O)CSCC(N)C(O)=O)C1SCC(=C(N1C2=O)C(O)=O)CSc3nnnn3C	2627	0	Zhao et al. J Chem Inf Model. 2007;47(1):170–175. DOI:10.1021/ci600312d
1451	COC2(NC(=O)CSCC#N)C1SCC(=C(N1C2=O)C(O)=O)CSc3nnnn3C	2626	0	Zhao et al. J Chem Inf Model. 2007;47(1):170–175. DOI:10.1021/ci600312d
1452	COC2(NC(=O)CSC(F)F)C1OCC(=C(N1C2=O)C(O)=O)CSc3nnnn3CCO	4252	0	Zhao et al. J Chem Inf Model. 2007;47(1):170–175. DOI:10.1021/ci600312d
1453	COc1cccnc1CCCCNc3nc(=O)c(Cc2ccc(C)nc2)c[nH]3	72108	0	Zhao et al. J Chem Inf Model. 2007;47(1):170–175. DOI:10.1021/ci600312d
1454	COc1ccccc1OCC2CNC(=O)O2	6257	1	Zhao et al. J Chem Inf Model. 2007;47(1):170–175. DOI:10.1021/ci600312d
1455	COc1ccccc1N4CCN(CCCCN2C(=O)C3C(=O)N(C(=O)C(C2=O)C3(C)C)C(C)(C)C)CC4	NA	1	Zhao et al. J Chem Inf Model. 2007;47(1):170–175. DOI:10.1021/ci600312d
1456	COc1ccccc1N3CCN(CCCC(O)c2ccc(F)cc2)CC3	13333	1	Zhao et al. J Chem Inf Model. 2007;47(1):170–175. DOI:10.1021/ci600312d
1457	COc1ccccc1N3CCN(CCCC(=O)c2ccc(F)cc2)CC3	15139	1	Zhao et al. J Chem Inf Model. 2007;47(1):170–175. DOI:10.1021/ci600312d
1458	COc1ccccc1N2CCN(CC2)CCc3oc(=O)[nH]c3c4ccc(F)cc4	68696	1	Zhao et al. J Chem Inf Model. 2007;47(1):170–175. DOI:10.1021/ci600312d
1459	COc1ccccc1N2CCN(CC2)CC(O)COc3cc(OC)c(OC)c(OC)c3	50222	1	Zhao et al. J Chem Inf Model. 2007;47(1):170–175. DOI:10.1021/ci600312d
1460	COc1cccc2c1C(=O)c1c(c3c(c(c1C2=O)O)CC(O)(CC3O)C(O)CO)O	178640	0	Zhao et al. J Chem Inf Model. 2007;47(1):170–175. DOI:10.1021/ci600312d
1461	COc1cccc(c1)C2(O)CCCCC2CN(C)C	5523	1	Zhao et al. J Chem Inf Model. 2007;47(1):170–175. DOI:10.1021/ci600312d
1462	COc1ccc2CC5C3CCC(O)C4Oc1c2C34CCN5C	3063	1	Zhao et al. J Chem Inf Model. 2007;47(1):170–175. DOI:10.1021/ci600312d
1463	COc1ccc2CC5C3CCC(=O)C4Oc1c2C34CCN5C	411697	1	Zhao et al. J Chem Inf Model. 2007;47(1):170–175. DOI:10.1021/ci600312d
1464	COc1ccc2CC5C3CC=C(OC(C)=O)C4Oc1c2C34CCN5C	10075	1	Zhao et al. J Chem Inf Model. 2007;47(1):170–175. DOI:10.1021/ci600312d
1465	COc1ccc2CC5C3C=CC(O)C4Oc1c2C34CCN5C	2828	1	Zhao et al. J Chem Inf Model. 2007;47(1):170–175. DOI:10.1021/ci600312d
1466	COc1ccc2CC4NCCC35C(Oc1c23)C(O)C=CC45	1255	1	Zhao et al. J Chem Inf Model. 2007;47(1):170–175. DOI:10.1021/ci600312d
1467	COc1ccc2CC4N(C)CCC35C(Oc1c23)C(=O)CCC45O	4635	1	Zhao et al. J Chem Inf Model. 2007;47(1):170–175. DOI:10.1021/ci600312d
1468	COc1ccc(Cl)cc1C(=O)NCCc2ccc(cc2)S(=O)(=O)NC(=O)NC3CCCCC3	3488	0	Zhao et al. J Chem Inf Model. 2007;47(1):170–175. DOI:10.1021/ci600312d
1469	COc1ccc(Cl)c2C(CCCc12)N(C)C	34789	1	Zhao et al. J Chem Inf Model. 2007;47(1):170–175. DOI:10.1021/ci600312d
1470	COc1ccc(cc1OC2CCCC2)C3CNC(=O)C3	5092	1	Zhao et al. J Chem Inf Model. 2007;47(1):170–175. DOI:10.1021/ci600312d
1471	COc1ccc(cc1OC)C(O)CN2CCN(CC2)c3cccccc3=O	55036	1	Zhao et al. J Chem Inf Model. 2007;47(1):170–175. DOI:10.1021/ci600312d
1472	COc1ccc(cc1OC)C(O)CN2CCN(CC2)C(c3ccccc3)c4ccccc4	146396	1	Zhao et al. J Chem Inf Model. 2007;47(1):170–175. DOI:10.1021/ci600312d
1473	COc1ccc(cc1O)c5cc(=O)c4c(O)cc(OC3OC(COC2OC(C)C(O)C(O)C2O)C(O)C(O)C3O)cc4o5	5353588	0	Zhao et al. J Chem Inf Model. 2007;47(1):170–175. DOI:10.1021/ci600312d
1474	COc1ccc(cc1C(=O)NCC2CCCN2Cc3ccc(F)cc3)S(N)(=O)=O	216225	1	Zhao et al. J Chem Inf Model. 2007;47(1):170–175. DOI:10.1021/ci600312d
1475	COc1ccc(cc1C(=O)NCC2CCCN2C)S(N)(=O)=O	3018598	1	Zhao et al. J Chem Inf Model. 2007;47(1):170–175. DOI:10.1021/ci600312d
1476	COc1ccc(cc1)N5CC(CN2CCC(O)(CC2)c4ccc3OCOc3c4)OC5=O	9823775	1	Zhao et al. J Chem Inf Model. 2007;47(1):170–175. DOI:10.1021/ci600312d
1477	COc1ccc(cc1)C3Sc2ccccc2N(CCN(C)C)C(=O)C3OC(C)=O	3076	0	Zhao et al. J Chem Inf Model. 2007;47(1):170–175. DOI:10.1021/ci600312d
1478	COc1ccc(cc1)C(CN(C)C)C2(O)CCCCC2	5656	1	Zhao et al. J Chem Inf Model. 2007;47(1):170–175. DOI:10.1021/ci600312d
1479	COc1ccc(cc1)C(=O)N2CCCC2=O	2196	1	Zhao et al. J Chem Inf Model. 2007;47(1):170–175. DOI:10.1021/ci600312d
1480	COc1cc2c(cc1OC)C(CN(C)CC2)c1ccccc1	5024	1	Zhao et al. J Chem Inf Model. 2007;47(1):170–175. DOI:10.1021/ci600312d
1481	COC1CC(OC(C)C1OC(C)=O)OC4C(C)C(OC2OC(C)CC(C2OC(C)=O)N(C)C)C(C)CC3(CO3)C(=O)C(C)C(OC(C)=O)C(C)C(C)OC(=O)C4C	418931	0	Zhao et al. J Chem Inf Model. 2007;47(1):170–175. DOI:10.1021/ci600312d
1482	COC1CC(OC(C)C1O)OC4C(C)C(OC2OC(C)CC(C2O)N(C)C)C(C)CC3(CO3)C(=O)C(C)C(O)C(C)C(C)OC(=O)C4C	4587	0	Zhao et al. J Chem Inf Model. 2007;47(1):170–175. DOI:10.1021/ci600312d
1483	COC1CC(OC(C)C1O)OC2C(C)OC(CC2OC)OC3C(C)C=CC=C6COC7C(O)C(=CC(C(=O)OC5CC(CC=C3C)OC4(CCC(C)C(O4)C(C)C)C5)C67O)C	5201207	0	Zhao et al. J Chem Inf Model. 2007;47(1):170–175. DOI:10.1021/ci600312d
1484	COc1cc(N)c(Cl)cc1C(=O)NC2CCN(CC2)Cc3ccccc3	2780	1	Zhao et al. J Chem Inf Model. 2007;47(1):170–175. DOI:10.1021/ci600312d
1485	COc1cc(ccc1OCCCN2CCC(CC2)c3noc4cc(F)ccc34)C(C)=O	71360	1	Zhao et al. J Chem Inf Model. 2007;47(1):170–175. DOI:10.1021/ci600312d
1486	COC1CC(CCC1O)C=C(C)C3OC(=O)C2CCCCN2C(=O)C(=O)C4(O)OC(C(CC(C)CC(=CC(CC=C)C(=O)CC(O)C3C)C)OC)C(CC4C)OC	5372	0	Zhao et al. J Chem Inf Model. 2007;47(1):170–175. DOI:10.1021/ci600312d
1487	COc1cc(cc(OC)c1OC)C7C2C(COC2=O)C(OC4OC3COC(OC3C(O)C4O)c5cccs5)c8cc6OCOc6cc78	100191	0	Zhao et al. J Chem Inf Model. 2007;47(1):170–175. DOI:10.1021/ci600312d
1488	COc1cc(cc(OC)c1OC)C(=O)OCCN5CCN(CCCN3c2ccccc2Sc4ccc(Cl)cc34)CC5	9800	1	Zhao et al. J Chem Inf Model. 2007;47(1):170–175. DOI:10.1021/ci600312d
1489	COc1cc(cc(OC)c1OC)C(=O)N2CCOCC2	12478	1	Zhao et al. J Chem Inf Model. 2007;47(1):170–175. DOI:10.1021/ci600312d
1490	COc1cc(cc(OC)c1OC)C(=O)N2CCCCCCC2	26650	1	Zhao et al. J Chem Inf Model. 2007;47(1):170–175. DOI:10.1021/ci600312d
1491	COc1cc(cc(OC)c1OC)C(=O)C=CN2CC=CC2	24909	1	Zhao et al. J Chem Inf Model. 2007;47(1):170–175. DOI:10.1021/ci600312d
1492	COc1cc(cc(OC)c1O)C6C2C(COC2=O)C(OC4OC3COC(C)OC3C(O)C4O)c7cc5OCOc5cc67	3310	0	Zhao et al. J Chem Inf Model. 2007;47(1):170–175. DOI:10.1021/ci600312d
1493	COc1cc(cc(c1OC)OC)C=CC(N)=O	21783	1	Zhao et al. J Chem Inf Model. 2007;47(1):170–175. DOI:10.1021/ci600312d
1494	COC1C=COC6(C)Oc5c(C)c(O)c4c(O)c(NC(=O)C(=CC=CC(C)C(O)C(C)C(O)C(C)C(OC(C)=O)C1C)C)c2c(nc3cc(C)ccn23)c4c5C6=O	53395233	0	Zhao et al. J Chem Inf Model. 2007;47(1):170–175. DOI:10.1021/ci600312d
1495	COC1C=COC6(C)Oc5c(C)c(O)c4c(O)c(NC(=O)C(=CC=CC(C)C(O)C(C)C(O)C(C)C(OC(C)=O)C1C)C)c(C=NN2CCN(CC2)C3CCCC3)c(O)c4c5C6=O	135448133	0	Zhao et al. J Chem Inf Model. 2007;47(1):170–175. DOI:10.1021/ci600312d
1496	COC1C=COC5(C)Oc4c(C)c(O)c3c(O)c(NC(=O)C(=CC=CC(C)C(O)C(C)C(O)C(C)C(OC(C)=O)C1C)C)c(C=NN2CCN(C)CC2)c(O)c3c4C5=O	135512673	0	Zhao et al. J Chem Inf Model. 2007;47(1):170–175. DOI:10.1021/ci600312d
1497	COC1C=COC4(C)Oc3c(C)c(O)c2c(O)c(NC(=O)C(=CC=CC(C)C(O)C(C)C(O)C(C)C(OC(C)=O)C1C)C)cc(O)c2c3C4=O	60907	0	Zhao et al. J Chem Inf Model. 2007;47(1):170–175. DOI:10.1021/ci600312d
1498	COC1C(O)CC(=O)OC(C)CC=CC=CC(OC2CCC(C(C)O2)N(C)C)C(C)CC(CC=O)C1OC1OC(C)C(OC2CC(C)(O)C(O)C(C)O2)C(C1O)N(C)C	5266	0	Zhao et al. J Chem Inf Model. 2007;47(1):170–175. DOI:10.1021/ci600312d
1499	COC1C(O)CC(=O)OC(C)CC=CC=CC(O)C(C)CC(CC=O)C1OC1OC(C)C(OC2CC(C)(O)C(O)C(C)O2)C(C1O)N(C)C	53394899	0	Zhao et al. J Chem Inf Model. 2007;47(1):170–175. DOI:10.1021/ci600312d
1500	COC1C(CC(=O)OC(C)CC=CC=CC(O)C(C)CC(CC=O)C1OC3OC(C)C(OC2CC(C)(O)C(OC(=O)CC(C)C)C(C)O2)C(C3O)N(C)C)OC(C)=O	3804	0	Zhao et al. J Chem Inf Model. 2007;47(1):170–175. DOI:10.1021/ci600312d
1501	COC12C=CC3(CC1C(C)(C)O)C4Cc6ccc(O)c7OC2C3(CCN4CC5CC5)c67	544534	1	Zhao et al. J Chem Inf Model. 2007;47(1):170–175. DOI:10.1021/ci600312d
1502	COC1=Nc2nc(cn2C2=C1CCCC2)c1noc(n1)C	3086516	1	Zhao et al. J Chem Inf Model. 2007;47(1):170–175. DOI:10.1021/ci600312d
1503	COC1=CC(=O)OC1C(O)c2ccccc2Cl	60572	1	Zhao et al. J Chem Inf Model. 2007;47(1):170–175. DOI:10.1021/ci600312d
1504	COC1=C(N3C(SC1)C(NC(=O)C(N)C2C=CCC=C2)C3=O)C(O)=O	3024461	0	Zhao et al. J Chem Inf Model. 2007;47(1):170–175. DOI:10.1021/ci600312d
1505	COC1(F)C(F)(F)C1(F)Cl	41967	1	Zhao et al. J Chem Inf Model. 2007;47(1):170–175. DOI:10.1021/ci600312d
1506	COC=2C=C1CCOC1=C(C=2)CN[C@@]3([H])CCCN[C@@]3([H])C4=CC=CC=C4	70202583	1	Shen et al. J Chem Inf Model. 2010;50(6):1034-1041. DOI: 10.1021/ci100104j
1507	COC=1C[S][C@@]2([H])N(C=1C(O)=O)C(=O)[C@@]2([H])NC(=O)[C@@](N)([H])[C@@]3([H])C=CCC=C3	5284529	0	Shen et al. J Chem Inf Model. 2010;50(6):1034-1041. DOI: 10.1021/ci100104j
1508	COC[C@@]1([H])CN(C(=O)O1)C3=C/C=C(/OC/C2=C/C=CC(C#N)=C2)C=C3	52542	1	Shen et al. J Chem Inf Model. 2010;50(6):1034-1041. DOI: 10.1021/ci100104j
1509	COC[C@@]1([H])CN(C(=O)O1)C2=C/C=C(/OCC[C@@](O)([H])C([F])([F])[F])C=C2	60824	1	Shen et al. J Chem Inf Model. 2010;50(6):1034-1041. DOI: 10.1021/ci100104j
1510	COC/C1=C(/N=C(C(/C=C/[C@@](O)([H])C[C@@](O)([H])CC(O)=O)=C1/C2=C/C=C(/[F])C=C2)C(C)(C)[H])C(C)(C)[H]	446156	1	Shen et al. J Chem Inf Model. 2010;50(6):1034-1041. DOI: 10.1021/ci100104j
1511	COC(OC)C(=O)C14OC(C)(C)OC1CC5C3CC(F)C2=CC(=O)C=CC2(C)C3(F)C(O)CC45C	73656953	1	Zhao et al. J Chem Inf Model. 2007;47(1):170–175. DOI:10.1021/ci600312d
1512	COC(F)(F)C(F)Br	12676	1	Zhao et al. J Chem Inf Model. 2007;47(1):170–175. DOI:10.1021/ci600312d
1513	COC(F)(F)C(Cl)Cl	4116	1	Zhao et al. J Chem Inf Model. 2007;47(1):170–175. DOI:10.1021/ci600312d
1514	COC(C5Cc4cc3cc(OC2CC(OC1CC(O)C(O)C(C)O1)C(O)C(C)O2)c(C)c(O)c3c(O)c4C(=O)C5OC8CC(OC7CC(O)C(OC6CC(C)(O)C(O)C(C)O6)C(C)O7)C(O)C(C)O8)C(=O)C(O)C(C)O	3518632	1	Zhao et al. J Chem Inf Model. 2007;47(1):170–175. DOI:10.1021/ci600312d
1515	COC(C(=O)NC2C1SC(C)(C)C(N1C2=O)C(O)=O)c3ccc(Cl)c(Cl)c3	6431808	0	Zhao et al. J Chem Inf Model. 2007;47(1):170–175. DOI:10.1021/ci600312d
1516	COC(=O)c1cncn1C(C)c2ccccc2	21474	1	Zhao et al. J Chem Inf Model. 2007;47(1):170–175. DOI:10.1021/ci600312d
1517	COC(=O)C1=C(C)NC(=C(C1c2ccccc2N(=O)=O)C(=O)OC)C	4485	0	Zhao et al. J Chem Inf Model. 2007;47(1):170–175. DOI:10.1021/ci600312d
1518	COC(=O)C1=C(C)NC(=C(C1c2cccc(c2)N(=O)=O)C(=O)OCCN(C)Cc3ccccc3)C	4474	0	Zhao et al. J Chem Inf Model. 2007;47(1):170–175. DOI:10.1021/ci600312d
1519	COC(=O)C(C1CCCCN1)c2ccccc2	4158	1	Zhao et al. J Chem Inf Model. 2007;47(1):170–175. DOI:10.1021/ci600312d
1520	COC([H])(OC)C(=O)[C@@]14OC(C)(C)O[C@@]1([H])C[C@@]5([H])[C@@]3([H])C[C@@]([F])([H])C2=CC(=O)C=C[C@@]2(C)[C@@]3([F])[C@@](O)([H])C[C@@]45C	20055353	1	Shen et al. J Chem Inf Model. 2010;50(6):1034-1041. DOI: 10.1021/ci100104j
1521	CO[C@@]5([H])C[C@@]4([H])CN3CCC1=C(NC2=CC(OC)=CC=C12)[C@@]3([H])C[C@@]4([H])[C@@]([H])(C(=O)OC)[C@@]5([H])OC	66252	1	Shen et al. J Chem Inf Model. 2010;50(6):1034-1041. DOI: 10.1021/ci100104j
1522	CO[C@@]5([H])[C@@]([H])(C[C@@]4([H])CN3CCC1=C(NC2=CC=CC=C12)[C@@]3([H])C[C@@]4([H])[C@@]5([H])C(=O)OC)OC(=O)C6=CC(OC)=C(OC)C(OC)=C6	8550	1	Shen et al. J Chem Inf Model. 2010;50(6):1034-1041. DOI: 10.1021/ci100104j
1523	CO[C@@]5([H])[C@@]([H])(C[C@@]4([H])CN3CCC1=C(NC2=CC(OC)=CC=C12)[C@@]3([H])C[C@@]4([H])[C@@]5([H])OC(C)=O)OC(=O)C6=CC(OC)=C(OC)C(OC)=C6	5770	1	Shen et al. J Chem Inf Model. 2010;50(6):1034-1041. DOI: 10.1021/ci100104j
1524	CO[C@@]5([H])[C@@]([H])(C[C@@]4([H])CN3CCC1=C(NC2=C/C=C(/[Cl])C=C12)[C@@]3([H])C[C@@]4([H])[C@@]5([H])C(=O)OC)OC(=O)C6=CC(OC)=C(OC)C(OC)=C6	71844	1	Shen et al. J Chem Inf Model. 2010;50(6):1034-1041. DOI: 10.1021/ci100104j
1525	CO[C@@]4([H])[C@@]([H])(OC(N)=O)[C@@](O)([H])[C@@]([H])(O/C3=C/C=C2C(O)=C(NC(=O)C1=C/C=C(/O)C(C/C=C(/C)C)=C1)C(=O)O/C2=C3/C)OC4(C)C	54675769	0	Shen et al. J Chem Inf Model. 2010;50(6):1034-1041. DOI: 10.1021/ci100104j
1526	CO[C@@]3([H])O[C@@]2([H])O[C@@]4(CN1CCCCC1)[C@@](O)([H])C[C@@]([H])([C@@]2(C)[H])[C@@]34[H]	68849	1	Shen et al. J Chem Inf Model. 2010;50(6):1034-1041. DOI: 10.1021/ci100104j
1527	CO[C@@]2(NC(=O)C/C1=C/C=C[S]1)C(=O)N3C(=C(C[S][C@@]23[H])COC(N)=O)C(O)=O	441199	0	Shen et al. J Chem Inf Model. 2010;50(6):1034-1041. DOI: 10.1021/ci100104j
1528	CO[C@@]2(NC(=O)[C@@]1([H])[S]C([S]1)=C(C(N)=O)C(O)=O)C(=O)N3C(=C(C[S][C@@]23[H])C[S]/C4=N/N=NN4C)C(O)=O	53025	0	Shen et al. J Chem Inf Model. 2010;50(6):1034-1041. DOI: 10.1021/ci100104j
1529	CO[C@@]2(NC(=O)[C@@]1([H])[S]C([S]1)=C(C#N)C(O)=O)C(=O)N3C(=C(C[S][C@@]23[H])C[S]/C4=N/N=NN4C)C(O)=O	65536	0	Shen et al. J Chem Inf Model. 2010;50(6):1034-1041. DOI: 10.1021/ci100104j
1530	CO[C@@]2(NC(=O)[C@@]([H])(C(O)=O)C1=C/C=C(/O)C=C1)C(=O)N3C(=C(CO[C@@]23[H])C[S]/C4=N/N=NN4C)C(O)=O	47499	0	Shen et al. J Chem Inf Model. 2010;50(6):1034-1041. DOI: 10.1021/ci100104j
1531	CO[C@@]2(NC(=O)[C@@]([H])(C(O)=O)C=1C=C[S]C=1)C(=O)N3[C@@]2([H])[S]C(C)(C)[C@@]3([H])C(O)=O	171758	0	Shen et al. J Chem Inf Model. 2010;50(6):1034-1041. DOI: 10.1021/ci100104j
1532	CO[C@@]2([H])[C@@](O)([H])[C@@](N)([H])[C@@]([H])(O[C@@]1([H])O[C@@]([H])(CC[C@@]1(N)[H])[C@@](C)(N)[H])[C@@](O)([H])[C@@]2([H])N(C)C(=O)CN	5284517	0	Shen et al. J Chem Inf Model. 2010;50(6):1034-1041. DOI: 10.1021/ci100104j
1533	CO[C@@]14N(C[C@@]2([H])N[C@@]12[H])C3=C(C(=O)C(N)=C(C)C3=O)[C@@]4([H])COC(N)=O	5746	0	Shen et al. J Chem Inf Model. 2010;50(6):1034-1041. DOI: 10.1021/ci100104j
1534	CO[C@@]12C=C[C@@]3(C[C@@]1([H])C(C)(C)O)[C@@]4([H])CC6=C/C=C(/O)C=7O[C@@]2([H])[C@@]3(CCN4C[C@@]5([H])CC5)C6=7	20054882	1	Shen et al. J Chem Inf Model. 2010;50(6):1034-1041. DOI: 10.1021/ci100104j
1535	CO[C@@]1(NC(=O)C[S]CC#N)C(=O)N2C(=C(C[S][C@@]12[H])C[S]/C3=N/N=NN3C)C(O)=O	42008	0	Shen et al. J Chem Inf Model. 2010;50(6):1034-1041. DOI: 10.1021/ci100104j
1536	CO[C@@]1(NC(=O)C[S]C[C@@](N)([H])C(O)=O)C(=O)N2C(=C(C[S][C@@]12[H])C[S]/C3=N/N=NN3C)C(O)=O	71141	0	Shen et al. J Chem Inf Model. 2010;50(6):1034-1041. DOI: 10.1021/ci100104j
1537	CO[C@@]1(NC(=O)C[S]C([F])([F])[H])C(=O)N2C(=C(CO[C@@]12[H])C[S]/C3=N/N=NN3CCO)C(O)=O	65864	0	Shen et al. J Chem Inf Model. 2010;50(6):1034-1041. DOI: 10.1021/ci100104j
1538	CO[C@@]1([H])CCC[C@@]2([H])C1=C(C=O)N3C(=O)[C@@]([H])([C@@]23[H])[C@@](C)(O)[H]	71452	0	Shen et al. J Chem Inf Model. 2010;50(6):1034-1041. DOI: 10.1021/ci100104j
1539	CO[C@@]1([H])C=CO[C@@]4(C)O/C3=C(/C)C(O)=C2C(O)=C(NC(=O)C(C)=CC=C[C@@](C)([H])[C@@](O)([H])[C@@](C)([H])[C@@](O)([H])[C@@](C)([H])[C@@]([H])(OC(C)=O)[C@@]1(C)[H])C=C(O)C2=C3C4=O	6324616	0	Shen et al. J Chem Inf Model. 2010;50(6):1034-1041. DOI: 10.1021/ci100104j
1540	CO[C@@]1([H])C[C@@]([H])(O[C@@](C)([H])[C@@]1(O)[H])O[C@@]2([H])[C@@](C)([H])O[C@@]([H])(C[C@@]2([H])OC)O[C@@]3([H])C(C)=CC[C@@]6([H])C[C@@]([H])(OC(=O)[C@@]5([H])C=C(C)[C@@](O)([H])[C@@]4([H])OCC(=CC=C[C@@]3(C)[H])[C@@]45O)C[C@@]7(O6)CC[C@@](C)([H])[C@@]([H])(O7)C(C)(C)[H]	6435110	0	Shen et al. J Chem Inf Model. 2010;50(6):1034-1041. DOI: 10.1021/ci100104j
1541	CO[C@@]1([H])C[C@@]([H])(CC[C@@]1(O)[H])C=C(C)[C@@]3([H])OC(=O)[C@@]2([H])CCCCN2C(=O)C(=O)[C@@]4(O)O[C@@]([H])([C@@]([H])(C[C@@](C)([H])CC(C)=C[C@@]([H])(CC=C)C(=O)C[C@@](O)([H])[C@@]3(C)[H])OC)[C@@]([H])(C[C@@]4(C)[H])OC	445643	0	Shen et al. J Chem Inf Model. 2010;50(6):1034-1041. DOI: 10.1021/ci100104j
1542	CO[C@@]1([H])[C@@](O)([H])CC(=O)O[C@@](C)([H])CC=CC=C[C@@](O)([H])[C@@](C)([H])C[C@@]([H])(CC=O)[C@@]1([H])O[C@@]3([H])O[C@@](C)([H])[C@@]([H])(O[C@@]2([H])C[C@@](C)(O)[C@@](O)([H])[C@@](C)([H])O2)[C@@]([H])(N(C)C)[C@@]3(O)[H]	NA	0	Shen et al. J Chem Inf Model. 2010;50(6):1034-1041. DOI: 10.1021/ci100104j
1543	CO[C@@]([H])(C(=O)N[C@@]1([H])C(=O)N2[C@@]1([H])[S]C(C)(C)[C@@]2([H])C(O)=O)C3=C/C=C(/[Cl])C([Cl])=C3	71807	0	Shen et al. J Chem Inf Model. 2010;50(6):1034-1041. DOI: 10.1021/ci100104j
1544	CO/N=C(/C(=O)N[C@@]1([H])C(=O)N2C(=C(C[S][C@@]12[H])COC(N)=O)C(=O)O[C@@](C)([H])OC(C)=O)C3=CC=CO3	5361467	0	Shen et al. J Chem Inf Model. 2010;50(6):1034-1041. DOI: 10.1021/ci100104j
1545	CO/N=C(/C(=O)N[C@@]1([H])C(=O)N2C(=C(C[S][C@@]12[H])COC(N)=O)C(=O)O[C@@](C)([H])OC(=O)C(C)(C)OC)C=3OC=CC=3	9595289	0	Shen et al. J Chem Inf Model. 2010;50(6):1034-1041. DOI: 10.1021/ci100104j
1546	CO/N=C(/C(=O)N[C@@]1([H])C(=O)N2C(=C(C[S][C@@]12[H])COC(C)=O)C(O)=O)C3=CC=CO3	9571078	0	Shen et al. J Chem Inf Model. 2010;50(6):1034-1041. DOI: 10.1021/ci100104j
1547	CO/N=C(/C(=O)N[C@@]1([H])C(=O)N2C(=C(C[S][C@@]12[H])C[S]/C3=C/N=N[S]3)C(O)=O)C4=C[S]C(N)=N4	6336505	0	Shen et al. J Chem Inf Model. 2010;50(6):1034-1041. DOI: 10.1021/ci100104j
1548	CO/C5=C/C=C1C(C(=O)O[C@@]1([H])[C@@]3([H])N(C)CCC4=CC=2OCOC=2C(OC)=C34)=C5OC	275196	1	Shen et al. J Chem Inf Model. 2010;50(6):1034-1041. DOI: 10.1021/ci100104j
1549	CO/C4=C/C=CC=5C(=O)C3=C(O)C=2C[C@@](O)(C[C@@]([H])(O[C@@]1([H])C[C@@](N)([H])C[C@@](C)([H])O1)C=2C(O)=C3C(=O)C4=5)C(=O)CO	152036	0	Shen et al. J Chem Inf Model. 2010;50(6):1034-1041. DOI: 10.1021/ci100104j
1550	CO/C4=C/C=CC=5C(=O)C3=C(O)C=2C[C@@](O)(C[C@@]([H])(O[C@@]1([H])C[C@@](N)([H])[C@@](O)([H])[C@@](C)([H])O1)C=2C(O)=C3C(=O)C4=5)C(C)=O	30323	0	Shen et al. J Chem Inf Model. 2010;50(6):1034-1041. DOI: 10.1021/ci100104j
1551	CO/C4=C/C=CC=5C(=O)C3=C(O)C=2C[C@@](O)(C[C@@]([H])(O[C@@]1([H])C[C@@](N)([H])[C@@](O)([H])[C@@](C)([H])O1)C=2C(O)=C3C(=O)C4=5)C(=O)CO	31703	0	Shen et al. J Chem Inf Model. 2010;50(6):1034-1041. DOI: 10.1021/ci100104j
1552	CO/C4=C/C=CC=5C(=O)C3=C(O)C=2C[C@@](O)(C[C@@]([H])(O[C@@]1([H])C[C@@]([H])(NC(=O)[C@@](N)([H])CC(C)(C)[H])[C@@](O)([H])[C@@](C)([H])O1)C=2C(O)=C3C(=O)C4=5)C(=O)CO	68897	0	Shen et al. J Chem Inf Model. 2010;50(6):1034-1041. DOI: 10.1021/ci100104j
1553	CO/C4=C/C=C3C[C@@]1([H])N(C)CC[C@@]2(CCCC[C@@]12[H])C3=C4	5360696	1	Shen et al. J Chem Inf Model. 2010;50(6):1034-1041. DOI: 10.1021/ci100104j
1554	CO/C4=C/C=C3C[C@@]1([H])N(C)CC[C@@]2(C[C@@](O)([H])CC[C@@]12O)C3=C4OC	5463863	1	Shen et al. J Chem Inf Model. 2010;50(6):1034-1041. DOI: 10.1021/ci100104j
1555	CO/C3=C/C=C2N=C/C=C(/CCC[C@@]1([H])CCNC[C@@]1([H])C=C)C2=C3	3050111	1	Shen et al. J Chem Inf Model. 2010;50(6):1034-1041. DOI: 10.1021/ci100104j
1556	CO/C3=C/C=C2[S]C1=CC=CC=C1N(C[C@@](C)([H])CN(C)C)C2=C3	72287	1	Shen et al. J Chem Inf Model. 2010;50(6):1034-1041. DOI: 10.1021/ci100104j
1557	CO/C3=C/C=2CC[C@@]([H])(NC(C)=O)C1=CC(=O)C(OC)=CC=C1C=2C(OC)=C3OC	6167	0	Shen et al. J Chem Inf Model. 2010;50(6):1034-1041. DOI: 10.1021/ci100104j
1558	CO/C2=C/C=C3CN(C)CC[C@@]14C=C[C@@](O)([H])C[C@@]1([H])OC2=C34	9651	1	Shen et al. J Chem Inf Model. 2010;50(6):1034-1041. DOI: 10.1021/ci100104j
1559	CO/C2=C/C=C1C[C@@]4([H])NCC[C@@]35C1=C2O[C@@]3([H])[C@@](O)([H])C=C[C@@]45[H]	9925873	1	Shen et al. J Chem Inf Model. 2010;50(6):1034-1041. DOI: 10.1021/ci100104j
1560	CO/C2=C/C=C1C[C@@]4([H])N(C)CC[C@@]35C1=C2O[C@@]3([H])C(=O)CC[C@@]45O	5284603	1	Shen et al. J Chem Inf Model. 2010;50(6):1034-1041. DOI: 10.1021/ci100104j
1561	CO/C2=C/C=C1C[C@@]4([H])N(C)CC[C@@]35C1=C2O[C@@]3([H])C(=O)CC[C@@]45[H]	5284569	1	Shen et al. J Chem Inf Model. 2010;50(6):1034-1041. DOI: 10.1021/ci100104j
1562	CO/C2=C/C=C1C[C@@]4([H])N(C)CC[C@@]35C1=C2O[C@@]3([H])[C@@](O)([H])CC[C@@]45[H]	5284543	1	Shen et al. J Chem Inf Model. 2010;50(6):1034-1041. DOI: 10.1021/ci100104j
1563	CO/C2=C/C=C1C[C@@]4([H])N(C)CC[C@@]35C1=C2O[C@@]3([H])[C@@](O)([H])C=C[C@@]45[H]	5284371	1	Shen et al. J Chem Inf Model. 2010;50(6):1034-1041. DOI: 10.1021/ci100104j
1564	CO/C2=C/C=C1C[C@@]4([H])N(C)CC[C@@]35C1=C2O[C@@]3([H])[C@@]([H])(CC[C@@]45[H])OC(=O)C6=CC=CN=C6	5464304	1	Shen et al. J Chem Inf Model. 2010;50(6):1034-1041. DOI: 10.1021/ci100104j
1565	CO/C2=C/C=1CCN(C)C[C@@]([H])(C=1/C=C2/OC)C3=CC=CC=C3	91277	1	Shen et al. J Chem Inf Model. 2010;50(6):1034-1041. DOI: 10.1021/ci100104j
1566	CO/C2=C/C(/C=C/C(=O)N1CCCCCCC1)=CC(OC)=C2OC	6443803	1	Shen et al. J Chem Inf Model. 2010;50(6):1034-1041. DOI: 10.1021/ci100104j
1567	CO/C1=C/C=CC4=C1C(=O)C3=C(O)C2=C(C[C@@](O)(C[C@@]2(O)[H])[C@@](O)([H])CO)C(O)=C3C4=O	NA	0	Shen et al. J Chem Inf Model. 2010;50(6):1034-1041. DOI: 10.1021/ci100104j
1568	CO/C1=C/C=C/C=C1/N4CCN(CCCCN2C(=O)[C@@]3([H])C(=O)N(C(=O)[C@@]([H])(C2=O)C3(C)C)C(C)(C)C)CC4	65902	1	Shen et al. J Chem Inf Model. 2010;50(6):1034-1041. DOI: 10.1021/ci100104j
1569	CO/C1=C/C=C(C=C1)N5C[C@@]([H])(CN2CC[C@@](O)(CC2)C4=CC=C3OCOC3=C4)OC5=O	3047810	1	Shen et al. J Chem Inf Model. 2010;50(6):1034-1041. DOI: 10.1021/ci100104j
1570	CO/C1=C/C=C(/C=C1/OC)[C@@](O)([H])CN2CCN(CC2)C3=CC=CC=CC3=O	133371	1	Shen et al. J Chem Inf Model. 2010;50(6):1034-1041. DOI: 10.1021/ci100104j
1571	CO/C1=C/C=C(/C=C1/O)C5=CC(=O)C4=C(O)C=C(O[C@@]3([H])O[C@@]([H])(CO[C@@]2([H])O[C@@](C)([H])[C@@](O)([H])[C@@](O)([H])[C@@]2(O)[H])[C@@](O)([H])[C@@](O)([H])[C@@]3(O)[H])C=C4O5	5281613	0	Shen et al. J Chem Inf Model. 2010;50(6):1034-1041. DOI: 10.1021/ci100104j
1572	CO/C1=C/C=C(/C#N)C=C1C(=O)NCCN2CCC([H])(CC2)C(=O)C3=C/C=C(/[F])C=C3	3050428	1	Shen et al. J Chem Inf Model. 2010;50(6):1034-1041. DOI: 10.1021/ci100104j
1573	CO/C1=C/C(=CC(OC)=C1OC)C=CC(N)=O	6154037	1	Shen et al. J Chem Inf Model. 2010;50(6):1034-1041. DOI: 10.1021/ci100104j
1574	CO/C1=C/C(=CC(OC)=C1O)[C@@]6([H])C3=CC=2OCOC=2C=C3[C@@]([H])(O[C@@]5([H])O[C@@]4([H])CO[C@@](C)([H])O[C@@]4([H])[C@@](O)([H])[C@@]5(O)[H])[C@@]7([H])COC(=O)[C@@]67[H]	36462	0	Shen et al. J Chem Inf Model. 2010;50(6):1034-1041. DOI: 10.1021/ci100104j
1575	CNS(=O)(=O)c2cc(C(=O)NCC1CCCN1CC=C)c(OC)cc2N	71253	1	Zhao et al. J Chem Inf Model. 2007;47(1):170–175. DOI:10.1021/ci600312d
1576	CNNCc1ccc(cc1)C(=O)NC(C)C	4915	1	Zhao et al. J Chem Inf Model. 2007;47(1):170–175. DOI:10.1021/ci600312d
1577	CNCCSC2=Cc1ccccc1Oc3ccc(F)cc23	6917740	1	Zhao et al. J Chem Inf Model. 2007;47(1):170–175. DOI:10.1021/ci600312d
1578	CNCCON=c2c1ccccc1ccc3ccccc23	28876	1	Zhao et al. J Chem Inf Model. 2007;47(1):170–175. DOI:10.1021/ci600312d
1579	CNCCOC(c1ccccc1)c2ccccc2C	25315	1	Zhao et al. J Chem Inf Model. 2007;47(1):170–175. DOI:10.1021/ci600312d
1580	CNCCCN2Cc1ccccc1Cc3ccccc23	3047746	1	Zhao et al. J Chem Inf Model. 2007;47(1):170–175. DOI:10.1021/ci600312d
1581	CNCCCN2c1ccccc1CCc3ccccc23	2995	1	Zhao et al. J Chem Inf Model. 2007;47(1):170–175. DOI:10.1021/ci600312d
1582	CNCCCN2c1ccccc1C(C)(C)c3ccccc23	145765	1	Zhao et al. J Chem Inf Model. 2007;47(1):170–175. DOI:10.1021/ci600312d
1583	CNCCCCOc1ccccc1Cc2ccccc2	2377	1	Zhao et al. J Chem Inf Model. 2007;47(1):170–175. DOI:10.1021/ci600312d
1584	CNCCCC2c1ccccc1C=Cc3ccccc23	4976	1	Zhao et al. J Chem Inf Model. 2007;47(1):170–175. DOI:10.1021/ci600312d
1585	CNCCCC2(C)CN(c1ccccc1)c3ccccc23	31707	1	Zhao et al. J Chem Inf Model. 2007;47(1):170–175. DOI:10.1021/ci600312d
1586	CNCCCC2(C)C(=O)N(c1ccccc1)c3ccccc23	31075	1	Zhao et al. J Chem Inf Model. 2007;47(1):170–175. DOI:10.1021/ci600312d
1587	CNCCCC13CCC(c2ccccc12)c4ccccc34	4011	1	Zhao et al. J Chem Inf Model. 2007;47(1):170–175. DOI:10.1021/ci600312d
1588	CNCCCC1(SC(C)(C)c2ccccc12)c3ccccc3	33014	1	Zhao et al. J Chem Inf Model. 2007;47(1):170–175. DOI:10.1021/ci600312d
1589	CNCCCC1(OC(C)(C)c2ccccc12)c3ccccc3	23573	1	Zhao et al. J Chem Inf Model. 2007;47(1):170–175. DOI:10.1021/ci600312d
1590	CNCCC=C3c1ccccc1C2CC2c4ccccc34	40029	1	Zhao et al. J Chem Inf Model. 2007;47(1):170–175. DOI:10.1021/ci600312d
1591	CNCCC=C2c1ccccc1CCc3ccccc23	4543	1	Zhao et al. J Chem Inf Model. 2007;47(1):170–175. DOI:10.1021/ci600312d
1592	CNCCC=C2c1ccccc1C(C)(C)c3ccccc23	82730	1	Zhao et al. J Chem Inf Model. 2007;47(1):170–175. DOI:10.1021/ci600312d
1593	CNCCC(Oc1ccccc1OC)c2ccccc2	4500	1	Zhao et al. J Chem Inf Model. 2007;47(1):170–175. DOI:10.1021/ci600312d
1594	CNCCC(Oc1ccccc1C)c2ccccc2	6850813	1	Zhao et al. J Chem Inf Model. 2007;47(1):170–175. DOI:10.1021/ci600312d
1595	CNCCC(Oc1cccc2ccccc12)c3cccs3	122252	1	Zhao et al. J Chem Inf Model. 2007;47(1):170–175. DOI:10.1021/ci600312d
1596	CNCCC(Oc1ccc(cc1)C(F)(F)F)c2ccccc2	3386	1	Zhao et al. J Chem Inf Model. 2007;47(1):170–175. DOI:10.1021/ci600312d
1597	CNCCC(O)C1CC(CN1)SC2=C(N3C(C2C)C(C(C)O)C3=O)C(O)=O	4488116	0	Zhao et al. J Chem Inf Model. 2007;47(1):170–175. DOI:10.1021/ci600312d
1598	CNCC1CN(C(=O)O1)c3ccc(OCc2cccc(Cl)c2)cc3	158621	1	Zhao et al. J Chem Inf Model. 2007;47(1):170–175. DOI:10.1021/ci600312d
1599	CNCC13CCC(c2ccccc12)c4ccccc34	28425	1	Zhao et al. J Chem Inf Model. 2007;47(1):170–175. DOI:10.1021/ci600312d
1600	CNCC=C(c1ccc(Br)cc1)c2cccnc2	68799	1	Zhao et al. J Chem Inf Model. 2007;47(1):170–175. DOI:10.1021/ci600312d
1601	CNCC[C@@](O)([H])[C@@]1([H])C[C@@]([H])(CN1)[S]/C3=C(/N2C(=O)[C@@]([H])([C@@]2([H])[C@@]3(C)[H])[C@@](C)(O)[H])C(O)=O	216262	0	Shen et al. J Chem Inf Model. 2010;50(6):1034-1041. DOI: 10.1021/ci100104j
1602	CNCC(O)CC13CCC(c2ccccc12)c4ccccc34	38207	1	Zhao et al. J Chem Inf Model. 2007;47(1):170–175. DOI:10.1021/ci600312d
1603	CNCC(O)c1cccc(OC(=O)C(C)(C)C)c1	130545	0	Zhao et al. J Chem Inf Model. 2007;47(1):170–175. DOI:10.1021/ci600312d
1604	CNCC(O)c1ccc(O)c(O)c1	838	0	Zhao et al. J Chem Inf Model. 2007;47(1):170–175. DOI:10.1021/ci600312d
1605	CNCC(O)c1ccc(c(c1)OC(=O)C(C)(C)C)OC(=O)C(C)(C)C	3105	0	Zhao et al. J Chem Inf Model. 2007;47(1):170–175. DOI:10.1021/ci600312d
1606	CNC3C(O)C2OC(OC1C(N)CC(N)C(O)C1O)C(N)CC2OC3OC4OC(CO)C(N)C(O)C4O	439519	0	Zhao et al. J Chem Inf Model. 2007;47(1):170–175. DOI:10.1021/ci600312d
1607	CNC2CCN3c1ccccc1CCc4cccc2c34	160410	1	Zhao et al. J Chem Inf Model. 2007;47(1):170–175. DOI:10.1021/ci600312d
1608	CNC2CCc1ncsc1C2	68895	1	Zhao et al. J Chem Inf Model. 2007;47(1):170–175. DOI:10.1021/ci600312d
1609	CNC2CCC(c1ccccc1)c3ccccc23	104181	1	Zhao et al. J Chem Inf Model. 2007;47(1):170–175. DOI:10.1021/ci600312d
1610	CNC2CCC(c1ccc(Cl)c(Cl)c1)c3ccccc23	5203	1	Zhao et al. J Chem Inf Model. 2007;47(1):170–175. DOI:10.1021/ci600312d
1611	CNC2Cc1ccccc1N(C)c3ccccc23	65700	1	Zhao et al. J Chem Inf Model. 2007;47(1):170–175. DOI:10.1021/ci600312d
1612	CNC2CC(c1ccc(Cl)c(Cl)c1)c3ccccc23	3703	1	Zhao et al. J Chem Inf Model. 2007;47(1):170–175. DOI:10.1021/ci600312d
1613	CNC2=Nc1ccc(Cl)cc1C(=N(=O)C2)c3ccccc3	NA	1	Zhao et al. J Chem Inf Model. 2007;47(1):170–175. DOI:10.1021/ci600312d
1614	CNc1nc(Cl)c(SC)c(n1)N2CCN(C)CC2	68678	1	Zhao et al. J Chem Inf Model. 2007;47(1):170–175. DOI:10.1021/ci600312d
1615	CNc1cc(OC)c(cc1Cl)C(=O)NC3CCN(Cc2ccccc2)C3C	4452	1	Zhao et al. J Chem Inf Model. 2007;47(1):170–175. DOI:10.1021/ci600312d
1616	CNC1C(O)C(OCC1(C)O)OC3C(N)CC(N)C(OC2OC(=CCC2N)CN)C3O	5224	0	Zhao et al. J Chem Inf Model. 2007;47(1):170–175. DOI:10.1021/ci600312d
1617	CNC1C(O)C(OCC1(C)O)OC3C(CC(N)C(OC2OC(CN)C(O)C(O)C2O)C3O)NC(=O)C(O)CN	3755	0	Zhao et al. J Chem Inf Model. 2007;47(1):170–175. DOI:10.1021/ci600312d
1618	CNC1C(O)C(OCC1(C)O)OC1C(N)CC(N)C(OC2OC(CN)CCC2N)C1O	582362	0	Zhao et al. J Chem Inf Model. 2007;47(1):170–175. DOI:10.1021/ci600312d
1619	CNC1C(O)C(O)C(CO)OC1OC2C(OC(C)C2(O)CO)OC3C(O)C(O)C(NC(N)=N)C(O)C3NC(N)=N	3069	0	Zhao et al. J Chem Inf Model. 2007;47(1):170–175. DOI:10.1021/ci600312d
1620	CNC1C(O)C(O)C(CO)OC1OC2C(OC(C)C2(O)C=O)OC3C(O)C(O)C(NC(N)=N)C(O)C3NC(N)=N	5297	0	Zhao et al. J Chem Inf Model. 2007;47(1):170–175. DOI:10.1021/ci600312d
1621	CNC1(CCCCC1=O)c2ccccc2Cl	3821	1	Zhao et al. J Chem Inf Model. 2007;47(1):170–175. DOI:10.1021/ci600312d
1622	CNC[C@@]1([H])CN(C(=O)O1)C3=C/C=C(/OC/C2=C/C=CC([Cl])=C2)C=C3	172287	1	Shen et al. J Chem Inf Model. 2010;50(6):1034-1041. DOI: 10.1021/ci100104j
1623	CNC[C@@](O)([H])C[C@@]13CC[C@@]([H])(C2=CC=CC=C12)C4=CC=CC=C34	53511	1	Shen et al. J Chem Inf Model. 2010;50(6):1034-1041. DOI: 10.1021/ci100104j
1624	CNC/C=C(/C1=C/C=C(/[Br])C=C1)C2=CC=CN=C2	5378630	1	Shen et al. J Chem Inf Model. 2010;50(6):1034-1041. DOI: 10.1021/ci100104j
1625	CNC(NCCSCc1ccc(CN(C)C)o1)=CN(=O)=O	5039	0	Zhao et al. J Chem Inf Model. 2007;47(1):170–175. DOI:10.1021/ci600312d
1626	CNC(NCC[S]CC=1N=CNC=1C)=NC#N	2756	0	Shen et al. J Chem Inf Model. 2010;50(6):1034-1041. DOI: 10.1021/ci100104j
1627	CNC(NCC[S]C/C1=C/C=C(/CN(C)C)O1)=CN(=O)=O	3001055	0	Shen et al. J Chem Inf Model. 2010;50(6):1034-1041. DOI: 10.1021/ci100104j
1628	CNC(Cc2ccc1ccccc1c2)=NC	42153	1	Zhao et al. J Chem Inf Model. 2007;47(1):170–175. DOI:10.1021/ci600312d
1629	CNC(C)Cc1ccccc1	1206	1	Zhao et al. J Chem Inf Model. 2007;47(1):170–175. DOI:10.1021/ci600312d
1630	CNC(C)C(=O)c1ccc(OC)cc1	216281	0	Zhao et al. J Chem Inf Model. 2007;47(1):170–175. DOI:10.1021/ci600312d
1631	CNC(=O)Oc3ccc2N(C)C1N(C)CCC1(C)c2c3	4811	1	Zhao et al. J Chem Inf Model. 2007;47(1):170–175. DOI:10.1021/ci600312d
1632	CNC(=O)OC2OC(=O)C3C1CC(C=C1)C23	6917807	1	Zhao et al. J Chem Inf Model. 2007;47(1):170–175. DOI:10.1021/ci600312d
1633	CNC(=O)OC1C2C3CC(C2C(=O)O1)C=C3	71995	1	Shen et al. J Chem Inf Model. 2010;50(6):1034-1041. DOI: 10.1021/ci100104j
1634	CNC(=O)O/C3=C/C=C2N(C)[C@@]1([H])N(C)CC[C@@]1(C)C2=C3	5983	1	Shen et al. J Chem Inf Model. 2010;50(6):1034-1041. DOI: 10.1021/ci100104j
1635	CNC(=O)NC(O)C(Cl)(Cl)Cl	71808	1	Zhao et al. J Chem Inf Model. 2007;47(1):170–175. DOI:10.1021/ci600312d
1636	CNC(=O)N1CC(C1)Oc2cccc(c2)C(F)(F)F	53467	1	Zhao et al. J Chem Inf Model. 2007;47(1):170–175. DOI:10.1021/ci600312d
1637	CNC(=O)CCN1CCN(CCC=C2c3ccccc3Sc3ccc(cc23)Cl)CC1	20495	1	Zhao et al. J Chem Inf Model. 2007;47(1):170–175. DOI:10.1021/ci600312d
1638	CNC(=O)CC(N)C(=O)NC(C(=O)NC2C1SC(C)(C)C(N1C2=O)C(O)=O)c3ccc(O)cc3	2245	0	Zhao et al. J Chem Inf Model. 2007;47(1):170–175. DOI:10.1021/ci600312d
1639	CNC(=O)C[C@@](N)([H])C(=O)N[C@@]([H])(C(=O)N[C@@]1([H])C(=O)N2[C@@]1([H])[S]C(C)(C)[C@@]2([H])C(O)=O)C3=C/C=C(/O)C=C3	71961	0	Shen et al. J Chem Inf Model. 2010;50(6):1034-1041. DOI: 10.1021/ci100104j
1640	CN5CCN(CCN4CCN(CCCN2c1ccccc1Sc3ccc(Cl)cc23)CC4)C5=O	23896	1	Zhao et al. J Chem Inf Model. 2007;47(1):170–175. DOI:10.1021/ci600312d
1641	Cn5c(=O)n(C)c4ncn(CCN1CCC(CC1)c2c[nH]c3ccccc23)c4c5=O	71304	1	Zhao et al. J Chem Inf Model. 2007;47(1):170–175. DOI:10.1021/ci600312d
1642	CN4CCN2C(CN=C(c1cccs1)c3ccc(F)cc23)C4	65844	1	Zhao et al. J Chem Inf Model. 2007;47(1):170–175. DOI:10.1021/ci600312d
1643	CN4CCN(CCCN2c1ccccc1Sc3ccc(Cl)cc23)CC4	4917	1	Zhao et al. J Chem Inf Model. 2007;47(1):170–175. DOI:10.1021/ci600312d
1644	CN4CCN(CCCN2c1ccccc1Sc3ccc(cc23)S(=O)(=O)N(C)C)CC4	9429	1	Zhao et al. J Chem Inf Model. 2007;47(1):170–175. DOI:10.1021/ci600312d
1645	CN4CCN(CCCN2c1ccccc1Sc3ccc(cc23)C(F)(F)F)CC4	5566	1	Zhao et al. J Chem Inf Model. 2007;47(1):170–175. DOI:10.1021/ci600312d
1646	CN4CCN(CCC=C2c1ccccc1Sc3ccc(cc23)S(=O)(=O)N(C)C)CC4	5454	1	Zhao et al. J Chem Inf Model. 2007;47(1):170–175. DOI:10.1021/ci600312d
1647	CN4CCN(CC/C=C2/C1=CC=CC=C1[S]C3=CC=C(C=C23)[S](=O)(=O)N(C)C)CC4	941651	1	Shen et al. J Chem Inf Model. 2010;50(6):1034-1041. DOI: 10.1021/ci100104j
1648	CN4CCc3[nH]c2ccc1scc(C)c1c2c3C4	71140	1	Zhao et al. J Chem Inf Model. 2007;47(1):170–175. DOI:10.1021/ci600312d
1649	CN4CC[C@@]3(O)C1=CC=CC=C1OC=2C(=CC=CC=2C)[C@@]3([H])C4	166560	1	Shen et al. J Chem Inf Model. 2010;50(6):1034-1041. DOI: 10.1021/ci100104j
1650	CN4C[C@@]3([H])CC1=C/C=C(/[Cl])C=C1[C@@]([H])(C2=CC=CC=C2)[C@@]3([H])C4	3045392	1	Shen et al. J Chem Inf Model. 2010;50(6):1034-1041. DOI: 10.1021/ci100104j
1651	CN4C[C@@]3([H])C1=CC=CC=C1OC2=C/C=C(/[Cl])C=C2[C@@]3([H])C4	163091	1	Shen et al. J Chem Inf Model. 2010;50(6):1034-1041. DOI: 10.1021/ci100104j
1652	CN3CCOC(c1ccccc1)c2ccccc2C3	4450	1	Zhao et al. J Chem Inf Model. 2007;47(1):170–175. DOI:10.1021/ci600312d
1653	CN3CCC2Nc1ccc(C)cc1C2C3	65684	1	Zhao et al. J Chem Inf Model. 2007;47(1):170–175. DOI:10.1021/ci600312d
1654	CN3CC2Cc1ccc(Cl)cc1C(C2C3)c4ccccc4	70609497	1	Zhao et al. J Chem Inf Model. 2007;47(1):170–175. DOI:10.1021/ci600312d
1655	CN3Cc1c(ncn1c2ccsc2C3=O)C(=O)OC(C)(C)C	127382	1	Zhao et al. J Chem Inf Model. 2007;47(1):170–175. DOI:10.1021/ci600312d
1656	CN3CC[C@@]12C=4C=5O[C@@]1(C)C(=O)CC[C@@]2([H])[C@@]3([H])CC=4C=CC=5O	5359353	1	Shen et al. J Chem Inf Model. 2010;50(6):1034-1041. DOI: 10.1021/ci100104j
1657	CN3CC[C@@]12C=4C=5O[C@@]1([H])C(=O)CC[C@@]2(O)[C@@]3([H])CC=4C=CC=5O	5284604	1	Shen et al. J Chem Inf Model. 2010;50(6):1034-1041. DOI: 10.1021/ci100104j
1658	CN3CC[C@@]12C=4C=5O[C@@]1([H])C(=O)CC[C@@]2([H])[C@@]3([H])CC=4C=CC=5O	5284570	1	Shen et al. J Chem Inf Model. 2010;50(6):1034-1041. DOI: 10.1021/ci100104j
1659	CN3CC[C@@]12C=4C=5O[C@@]1([H])[C@@](O)([H])CC[C@@]2(O)[C@@]3([H])CC=4C=CC=5O	5463858	1	Shen et al. J Chem Inf Model. 2010;50(6):1034-1041. DOI: 10.1021/ci100104j
1660	CN3CC[C@@]12C=4C=5O[C@@]1([H])[C@@](O)([H])C=C[C@@]2([H])[C@@]3([H])CC=4C=CC=5O	5288826	1	Shen et al. J Chem Inf Model. 2010;50(6):1034-1041. DOI: 10.1021/ci100104j
1661	CN3CC[C@@]12C=4C=5O[C@@]1([H])[C@@]([H])(C=C[C@@]2([H])[C@@]3([H])CC=4C=CC=5OC(C)=O)OC(C)=O	5462328	1	Shen et al. J Chem Inf Model. 2010;50(6):1034-1041. DOI: 10.1021/ci100104j
1662	CN3CC[C@@]12C=4C=5O[C@@]1([H])[C@@]([H])(C=C[C@@]2([H])[C@@]3([H])CC=4C=CC=5OC(=O)C6=CC=CN=C6)OC(=O)C7=CC=CN=C7	5362460	1	Shen et al. J Chem Inf Model. 2010;50(6):1034-1041. DOI: 10.1021/ci100104j
1663	Cn3cc(CCN1CCN(CC1)c2ccccc2Cl)cn3	208921	1	Zhao et al. J Chem Inf Model. 2007;47(1):170–175. DOI:10.1021/ci600312d
1664	CN3CC(c1ccccc1)c2cccc(N)c2C3	4528	1	Zhao et al. J Chem Inf Model. 2007;47(1):170–175. DOI:10.1021/ci600312d
1665	CN3c1ccccc1C(NCCCCCCC(O)=O)c2ccc(Cl)cc2S3(=O)=O	68870	1	Zhao et al. J Chem Inf Model. 2007;47(1):170–175. DOI:10.1021/ci600312d
1666	CN3C[C@@]12C=4C=5O[C@@]1([H])C(C)=CC[C@@]2([H])[C@@]3([H])CC=4C=CC=5O	5362518	1	Shen et al. J Chem Inf Model. 2010;50(6):1034-1041. DOI: 10.1021/ci100104j
1667	CN3C(CNC(=O)c1ccsc1)CN=C(c2ccccc2F)c4ccccc34	115208	1	Zhao et al. J Chem Inf Model. 2007;47(1):170–175. DOI:10.1021/ci600312d
1668	CN3C(CNC(=O)c1ccoc1)CN=C(c2ccccc2)c4ccc(F)cc34	3045400	1	Zhao et al. J Chem Inf Model. 2007;47(1):170–175. DOI:10.1021/ci600312d
1669	Cn3c(=O)n(C)c2ncn(CCNCC(O)c1ccc(O)c(O)c1)c2c3=O	71857	0	Zhao et al. J Chem Inf Model. 2007;47(1):170–175. DOI:10.1021/ci600312d
1670	CN3C(=O)CN2CCc1ccccc1C2c4cc(Cl)ccc34	24107	1	Zhao et al. J Chem Inf Model. 2007;47(1):170–175. DOI:10.1021/ci600312d
1671	CN3C(=O)CN1C(=O)C=C(C)OC1(c2ccccc2)c4cc(Cl)ccc34	33746	1	Zhao et al. J Chem Inf Model. 2007;47(1):170–175. DOI:10.1021/ci600312d
1672	CN3C(=O)CC2(CCN(CCCC(=O)c1ccc(F)cc1)CC2)C3=O	71117	1	Zhao et al. J Chem Inf Model. 2007;47(1):170–175. DOI:10.1021/ci600312d
1673	Cn2nc(c1cccc(F)c1)n(C)c2=S	25431	1	Zhao et al. J Chem Inf Model. 2007;47(1):170–175. DOI:10.1021/ci600312d
1674	CN2CCN=C(c1ccccc1)c3cc(Cl)ccc23	4041	1	Zhao et al. J Chem Inf Model. 2007;47(1):170–175. DOI:10.1021/ci600312d
1675	CN2CCCc3cccc(OCC1CNCCO1)c23	177949	1	Zhao et al. J Chem Inf Model. 2007;47(1):170–175. DOI:10.1021/ci600312d
1676	CN2CCC36C4Oc7c(OC(=O)c1cccnc1)ccc(CC2C3C=CC4OC(=O)c5cccnc5)c67	571623	1	Zhao et al. J Chem Inf Model. 2007;47(1):170–175. DOI:10.1021/ci600312d
1677	CN2CCc1cccc3c1C2Cc4ccc(O)c(O)c34	2215	1	Zhao et al. J Chem Inf Model. 2007;47(1):170–175. DOI:10.1021/ci600312d
1678	CN2CCc1cc(Cl)c(O)cc1C(C2)c3cccc4CCOc34	14958952	1	Zhao et al. J Chem Inf Model. 2007;47(1):170–175. DOI:10.1021/ci600312d
1679	CN2CCc1cc(Cl)c(O)cc1C(C2)c3cc(Br)cc4CCOc34	9931305	1	Zhao et al. J Chem Inf Model. 2007;47(1):170–175. DOI:10.1021/ci600312d
1680	CN2CCC14C3CCCC1C2Cc5ccc(O)c(O3)c45	521115	1	Zhao et al. J Chem Inf Model. 2007;47(1):170–175. DOI:10.1021/ci600312d
1681	CN2CCC14C3CCC(C)(O)C1Oc5c(O)ccc(CC23)c45	12312819	1	Zhao et al. J Chem Inf Model. 2007;47(1):170–175. DOI:10.1021/ci600312d
1682	CN2CCC14C3CCC(=O)C1Oc5c(O)ccc(CC23)c45	3648	1	Zhao et al. J Chem Inf Model. 2007;47(1):170–175. DOI:10.1021/ci600312d
1683	CN2CCC14C3CCC(=O)C1(C)Oc5c(O)ccc(CC23)c45	518929	1	Zhao et al. J Chem Inf Model. 2007;47(1):170–175. DOI:10.1021/ci600312d
1684	CN2CCC13CCCCC1C2Cc4ccc(O)cc34	3918	1	Zhao et al. J Chem Inf Model. 2007;47(1):170–175. DOI:10.1021/ci600312d
1685	CN2CCC13CCCCC1C2Cc4ccc(C)cc34	3079	1	Zhao et al. J Chem Inf Model. 2007;47(1):170–175. DOI:10.1021/ci600312d
1686	CN2CCC1=CC([Cl])=C(O)C=C1[C@@]([H])(C2)C3=CC=CC=4CCOC3=4	132421	1	Shen et al. J Chem Inf Model. 2010;50(6):1034-1041. DOI: 10.1021/ci100104j
1687	CN2CC14C3CC=C(C)C1Oc5c(O)ccc(CC23)c45	NA	1	Zhao et al. J Chem Inf Model. 2007;47(1):170–175. DOI:10.1021/ci600312d
1688	CN2CC[C@@]13CCCC[C@@]1([H])[C@@]2([H])CC4=C/C=C(/O)C=C34	5359272	1	Shen et al. J Chem Inf Model. 2010;50(6):1034-1041. DOI: 10.1021/ci100104j
1689	CN2CC[C@@]13CCCC[C@@]1([H])[C@@]2([H])CC4=C/C=C(/O)C=C34	5360697	1	Shen et al. J Chem Inf Model. 2010;50(6):1034-1041. DOI: 10.1021/ci100104j
1690	CN2CC[C@@]13CCCC[C@@]1([H])[C@@]2([H])CC4=C/C=C(/C)C=C34	3037918	1	Shen et al. J Chem Inf Model. 2010;50(6):1034-1041. DOI: 10.1021/ci100104j
1691	CN2CC(CSc1ccccn1)C=C3C2Cc4c[nH]c5cccc3c45	42610	1	Zhao et al. J Chem Inf Model. 2007;47(1):170–175. DOI:10.1021/ci600312d
1692	CN2CC(CN1CC(=O)NC(=O)C1)C=C3C2Cc4c[nH]c5cccc3c45	19769471	1	Zhao et al. J Chem Inf Model. 2007;47(1):170–175. DOI:10.1021/ci600312d
1693	CN2C[C@@]([H])(CN1CC(=O)NC(=O)C1)C=C3C=5C=CC=C4NC=C(C[C@@]23[H])C4=5	65898	1	Shen et al. J Chem Inf Model. 2010;50(6):1034-1041. DOI: 10.1021/ci100104j
1694	CN2C[C@@]([H])(C[S]/C1=C/C=CC=N1)C=C3C=5C=CC=C4NC=C(C[C@@]23[H])C4=5	9884658	1	Shen et al. J Chem Inf Model. 2010;50(6):1034-1041. DOI: 10.1021/ci100104j
1695	CN2C(CO)CN=C(c1ccccc1Cl)c3cc(Cl)ccc23	11724484	1	Zhao et al. J Chem Inf Model. 2007;47(1):170–175. DOI:10.1021/ci600312d
1696	CN2C(Cc1ccccc1N=C2C)c3ccccc3	53432	1	Zhao et al. J Chem Inf Model. 2007;47(1):170–175. DOI:10.1021/ci600312d
1697	CN2C(c1ccc(Cl)cc1)S(=O)(=O)CCC2=O	2717	1	Zhao et al. J Chem Inf Model. 2007;47(1):170–175. DOI:10.1021/ci600312d
1698	CN2C(c1ccc(Cl)c(Cl)c1)S(=O)(=O)CCC2=O	71209	1	Zhao et al. J Chem Inf Model. 2007;47(1):170–175. DOI:10.1021/ci600312d
1699	CN2C(=S)CN=C(c1ccccc1)c3cc(Cl)ccc23	17931	1	Zhao et al. J Chem Inf Model. 2007;47(1):170–175. DOI:10.1021/ci600312d
1700	CN2C(=O)NC(=O)C(C)(C1=CCCCC1)C2=O	3608	1	Zhao et al. J Chem Inf Model. 2007;47(1):170–175. DOI:10.1021/ci600312d
1701	CN2C(=O)CN=C(c1ccccc1F)c3cc(Cl)ccc23	3369	1	Zhao et al. J Chem Inf Model. 2007;47(1):170–175. DOI:10.1021/ci600312d
1702	CN2C(=O)CN=C(c1ccccc1F)c3cc(ccc23)N(=O)=O	3380	1	Zhao et al. J Chem Inf Model. 2007;47(1):170–175. DOI:10.1021/ci600312d
1703	CN2C(=O)CN=C(c1ccccc1F)c3c(C)nn(C)c23	35775	1	Zhao et al. J Chem Inf Model. 2007;47(1):170–175. DOI:10.1021/ci600312d
1704	CN2C(=O)CN=C(c1ccccc1)c3cc(Cl)ccc23	3016	1	Zhao et al. J Chem Inf Model. 2007;47(1):170–175. DOI:10.1021/ci600312d
1705	CN2C(=O)CN=C(c1ccccc1)c3cc(ccc23)N(=O)=O	4496	1	Zhao et al. J Chem Inf Model. 2007;47(1):170–175. DOI:10.1021/ci600312d
1706	CN2C(=O)CN=C(C1=CCCCC1)c3cc(Cl)ccc23	25215	1	Zhao et al. J Chem Inf Model. 2007;47(1):170–175. DOI:10.1021/ci600312d
1707	CN2C(=O)CN=C(C1=CCCCC1)c3cc(ccc23)N(=O)=O	189875	1	Zhao et al. J Chem Inf Model. 2007;47(1):170–175. DOI:10.1021/ci600312d
1708	CN2C(=O)CN(C(c1ccccc1)c3cc(Cl)ccc23)C(N)=O	68787	1	Zhao et al. J Chem Inf Model. 2007;47(1):170–175. DOI:10.1021/ci600312d
1709	CN2C(=O)CC(=O)N(c1ccccc1)c3cc(Cl)ccc23	2789	1	Zhao et al. J Chem Inf Model. 2007;47(1):170–175. DOI:10.1021/ci600312d
1710	CN2C(=O)CC(=O)N(c1ccccc1)c3cc(ccc23)C(F)(F)F	31157	1	Zhao et al. J Chem Inf Model. 2007;47(1):170–175. DOI:10.1021/ci600312d
1711	CN2C(=O)CC(=O)N(c1ccccc1)c3c(C)nn(C)c23	132677	1	Zhao et al. J Chem Inf Model. 2007;47(1):170–175. DOI:10.1021/ci600312d
1712	CN2C(=O)CC(=O)N(c1ccccc1)c3c(C)n[nH]c23	71228	1	Zhao et al. J Chem Inf Model. 2007;47(1):170–175. DOI:10.1021/ci600312d
1713	CN2C(=O)C(O)N=C(c1ccccc1F)c3cc(Cl)ccc23	40344	1	Zhao et al. J Chem Inf Model. 2007;47(1):170–175. DOI:10.1021/ci600312d
1714	CN2C(=O)C(O)N=C(c1ccccc1Cl)c3cc(Cl)ccc23	13314	1	Zhao et al. J Chem Inf Model. 2007;47(1):170–175. DOI:10.1021/ci600312d
1715	CN2C(=O)C(O)N=C(c1ccccc1)c3cc(Cl)ccc23	5391	1	Zhao et al. J Chem Inf Model. 2007;47(1):170–175. DOI:10.1021/ci600312d
1716	CN2C(=C(O)c1sccc1S2(=O)=O)C(=O)Nc3ccccn3	54677971	0	Zhao et al. J Chem Inf Model. 2007;47(1):170–175. DOI:10.1021/ci600312d
1717	CN2C(=C(O)c1ccccc1S2(=O)=O)C(=O)Nc3ncc(C)s3	54677470	0	Zhao et al. J Chem Inf Model. 2007;47(1):170–175. DOI:10.1021/ci600312d
1718	CN2C(=C(O)c1ccccc1S2(=O)=O)C(=O)Nc3ccccn3	54676228	0	Zhao et al. J Chem Inf Model. 2007;47(1):170–175. DOI:10.1021/ci600312d
1719	CN2C(=C(O)c1ccccc1S2(=O)=O)C(=O)Nc3cc(C)on3	54677972	0	Zhao et al. J Chem Inf Model. 2007;47(1):170–175. DOI:10.1021/ci600312d
1720	Cn1nnnc1SCC2=C(N4C(SC2)C(NC(=O)C(O)c3ccccc3)C4=O)C(O)=O	2614	0	Zhao et al. J Chem Inf Model. 2007;47(1):170–175. DOI:10.1021/ci600312d
1721	Cn1nnnc1SCC2=C(N3C(SC2)C(NC(=O)CSC=CC#N)C3=O)C(O)=O	NA	0	Zhao et al. J Chem Inf Model. 2007;47(1):170–175. DOI:10.1021/ci600312d
1722	Cn1nnnc1SCC2=C(N3C(SC2)C(NC(=O)CSC(F)(F)F)C3=O)C(O)=O	13229762	0	Zhao et al. J Chem Inf Model. 2007;47(1):170–175. DOI:10.1021/ci600312d
1723	Cn1nc(nc1c2ccccc2CO)c3cccnc3	68702	1	Zhao et al. J Chem Inf Model. 2007;47(1):170–175. DOI:10.1021/ci600312d
1724	CN1N=N/N=C1/[S]CC=2C[S][C@@]3([H])N(C=2C(O)=O)C(=O)[C@@]3([H])NC(=O)C[S]C([F])([F])[F]	40240	0	Shen et al. J Chem Inf Model. 2010;50(6):1034-1041. DOI: 10.1021/ci100104j
1725	CN1N=N/N=C1/[S]CC=2C[S][C@@]3([H])N(C=2C(O)=O)C(=O)[C@@]3([H])NC(=O)C[S]/C=C/C#N	6443795	0	Shen et al. J Chem Inf Model. 2010;50(6):1034-1041. DOI: 10.1021/ci100104j
1726	CN1N=N/N=C1/[S]CC=2C[S][C@@]3([H])N(C=2C(O)=O)C(=O)[C@@]3([H])NC(=O)[C@@](O)([H])C4=CC=CC=C4	456255	0	Shen et al. J Chem Inf Model. 2010;50(6):1034-1041. DOI: 10.1021/ci100104j
1727	Cn1cnc2n(C)c(=O)n(C)c(=O)c12	2519	1	Zhao et al. J Chem Inf Model. 2007;47(1):170–175. DOI:10.1021/ci600312d
1728	Cn1cnc2n(C)c(=O)[nH]c(=O)c12	5429	1	Zhao et al. J Chem Inf Model. 2007;47(1):170–175. DOI:10.1021/ci600312d
1729	CN1CCN3C(C1)c2cccn2Cc4ccccc34	51355	1	Zhao et al. J Chem Inf Model. 2007;47(1):170–175. DOI:10.1021/ci600312d
1730	CN1CCN3C(C1)c2ccccc2Cc4cccnc34	4205	1	Zhao et al. J Chem Inf Model. 2007;47(1):170–175. DOI:10.1021/ci600312d
1731	CN1CCN3C(C1)c2ccccc2Cc4ccccc34	4184	1	Zhao et al. J Chem Inf Model. 2007;47(1):170–175. DOI:10.1021/ci600312d
1732	CN1CCN(CC1)CCC(=O)N3c2ccccc2Sc4ccc(cc34)C(F)(F)F	969494	1	Zhao et al. J Chem Inf Model. 2007;47(1):170–175. DOI:10.1021/ci600312d
1733	CN1CCN(CC1)CC(=O)N3c2ccccc2C(=O)Nc4cccnc34	4848	1	Zhao et al. J Chem Inf Model. 2007;47(1):170–175. DOI:10.1021/ci600312d
1734	CN1CCN(CC1)CC(=O)C4(O)CCC5C3CCC2=CC(=O)C=CC2(C)C3C(O)CC45C	12877427	1	Zhao et al. J Chem Inf Model. 2007;47(1):170–175. DOI:10.1021/ci600312d
1735	CN1CCN(CC1)CC(=O)[C@@]4(O)CC[C@@]5([H])[C@@]3([H])CCC2=CC(=O)C=C[C@@]2(C)[C@@]3([H])[C@@](O)([H])C[C@@]45C	6064	1	Shen et al. J Chem Inf Model. 2010;50(6):1034-1041. DOI: 10.1021/ci100104j
1736	CN1CCN(CC1)c4cc3N(C)c2ccccc2Oc3nn4	159977	1	Zhao et al. J Chem Inf Model. 2007;47(1):170–175. DOI:10.1021/ci600312d
1737	CN1CCN(CC1)c3cc2n(cc(C(O)=O)c(=O)c2cc3F)c4ccc(F)cc4	56206	0	Zhao et al. J Chem Inf Model. 2007;47(1):170–175. DOI:10.1021/ci600312d
1738	CN1CCN(CC1)C3Cc2ccccc2Sc4ccc(Cl)cc34	1238	1	Zhao et al. J Chem Inf Model. 2007;47(1):170–175. DOI:10.1021/ci600312d
1739	CN1CCN(CC1)c3c(F)cc2c(=O)c(cn(CCF)c2c3F)C(O)=O	3357	0	Zhao et al. J Chem Inf Model. 2007;47(1):170–175. DOI:10.1021/ci600312d
1740	CN1CCN(CC1)C3=Nc2cscc2C(=CC#N)c4cscc34	3086153	1	Zhao et al. J Chem Inf Model. 2007;47(1):170–175. DOI:10.1021/ci600312d
1741	CN1CCN(CC1)C3=Nc2ccccc2Sc4nccn34	54742	1	Zhao et al. J Chem Inf Model. 2007;47(1):170–175. DOI:10.1021/ci600312d
1742	CN1CCN(CC1)C3=Nc2ccccc2Sc4ccc(C)cc34	22047	1	Zhao et al. J Chem Inf Model. 2007;47(1):170–175. DOI:10.1021/ci600312d
1743	CN1CCN(CC1)C3=Nc2ccccc2Oc4ccc(Cl)cc34	3964	1	Zhao et al. J Chem Inf Model. 2007;47(1):170–175. DOI:10.1021/ci600312d
1744	CN1CCN(CC1)C3=Nc2ccccc2Nc4sc(C)cc34	135398745	1	Zhao et al. J Chem Inf Model. 2007;47(1):170–175. DOI:10.1021/ci600312d
1745	CN1CCN(CC1)C3=Nc2ccccc2Cc4nc(C)nn34	60717	1	Zhao et al. J Chem Inf Model. 2007;47(1):170–175. DOI:10.1021/ci600312d
1746	CN1CCN(CC1)C3=Nc2ccccc2Cc4ccccc34	16106	1	Zhao et al. J Chem Inf Model. 2007;47(1):170–175. DOI:10.1021/ci600312d
1747	CN1CCN(CC1)C3=Nc2cc(F)ccc2Nc4sc(C)cc34	135413528	1	Zhao et al. J Chem Inf Model. 2007;47(1):170–175. DOI:10.1021/ci600312d
1748	CN1CCN(CC1)C3=Nc2cc(F)ccc2Cc4ccccc34	49381	1	Zhao et al. J Chem Inf Model. 2007;47(1):170–175. DOI:10.1021/ci600312d
1749	CN1CCN(CC1)C3=Nc2cc(Cl)ccc2Nc4ccccc34	135398737	1	Zhao et al. J Chem Inf Model. 2007;47(1):170–175. DOI:10.1021/ci600312d
1750	CN1CCN(CC1)C3=NC2=C[S]C=C2/C(=C/C#N)C4=C[S]C=C34	6450478	1	Shen et al. J Chem Inf Model. 2010;50(6):1034-1041. DOI: 10.1021/ci100104j
1751	CN1CCN(CC1)C3=Cc2cc(Cl)ccc2C(=CC#N)c4ccccc34	3052780	1	Zhao et al. J Chem Inf Model. 2007;47(1):170–175. DOI:10.1021/ci600312d
1752	CN1CCN(CC1)C3=CC2=CC([Cl])=CC=C2/C(=C/C#N)C4=CC=CC=C34	10090005	1	Shen et al. J Chem Inf Model. 2010;50(6):1034-1041. DOI: 10.1021/ci100104j
1753	CN1CCN(CC1)c2ncc(c(N)n2)c3cc(Cl)cc(Cl)c3Cl	60803	1	Zhao et al. J Chem Inf Model. 2007;47(1):170–175. DOI:10.1021/ci600312d
1754	CN1CCN(CC1)c2ccccc2Cc3ccccc3	3058753	1	Zhao et al. J Chem Inf Model. 2007;47(1):170–175. DOI:10.1021/ci600312d
1755	CN1CCN(CC1)c2c(F)cc3c(=O)c(cn4CCSc2c34)C(O)=O	58258	0	Zhao et al. J Chem Inf Model. 2007;47(1):170–175. DOI:10.1021/ci600312d
1756	CN1CCN(CC1)C1=Nc2ccccc2Sc2ccc(cc12)Cl	16351	1	Zhao et al. J Chem Inf Model. 2007;47(1):170–175. DOI:10.1021/ci600312d
1757	CN1CCN(CC1)C=C5N=C4CN=C(c2ccccc2Cl)c3cc(ccc3N4C5=O)N(=O)=O	62179	1	Zhao et al. J Chem Inf Model. 2007;47(1):170–175. DOI:10.1021/ci600312d
1758	CN1CCN(CC1)C=C5N=C4C/N=C(/C2=C/C=C/C=C2/[Cl])C3=CC(=CC=C3N4C5=O)N(=O)=O	3033860	1	Shen et al. J Chem Inf Model. 2010;50(6):1034-1041. DOI: 10.1021/ci100104j
1759	CN1CCN(CC1)C(c2ccccc2)c3ccc(Cl)cc3	2710	1	Zhao et al. J Chem Inf Model. 2007;47(1):170–175. DOI:10.1021/ci600312d
1760	CN1CCN(CC1)C(=O)OC2N(C(=O)c3nccnc23)c4ccc(Cl)cn4	5735	1	Zhao et al. J Chem Inf Model. 2007;47(1):170–175. DOI:10.1021/ci600312d
1761	CN1CCN(CC1)C(=O)OC2N(C(=O)C3=C2SCCS3)c5ccc4ccc(Cl)nc4n5	40903	1	Zhao et al. J Chem Inf Model. 2007;47(1):170–175. DOI:10.1021/ci600312d
1762	CN1CCN(C=2N3NC(C)=N[C@@H]3Cc3c(N=2)cccc3)CC1	NA	1	Roy et al. ACS Omega. 2019; 4(16):16774-16780. DOI: 10.1021/acsomega.9b01512
1763	CN1CCCN(CC1)C(c2ccccc2)c3ccc(Cl)cc3	3627	1	Zhao et al. J Chem Inf Model. 2007;47(1):170–175. DOI:10.1021/ci600312d
1764	CN1CCCCC1CCN3c2ccccc2Sc4ccc(cc34)S(C)=O	4078	1	Zhao et al. J Chem Inf Model. 2007;47(1):170–175. DOI:10.1021/ci600312d
1765	CN1CCCCC1CCN3c2ccccc2Sc4ccc(cc34)S(C)(=O)=O	31765	1	Zhao et al. J Chem Inf Model. 2007;47(1):170–175. DOI:10.1021/ci600312d
1766	CN1CCCC1c2cccnc2	942	1	Zhao et al. J Chem Inf Model. 2007;47(1):170–175. DOI:10.1021/ci600312d
1767	CN1CCCC(C1)CN3c2ccccc2Sc4ccccc34	6075	1	Zhao et al. J Chem Inf Model. 2007;47(1):170–175. DOI:10.1021/ci600312d
1768	CN1CCC4(C)C1N(C)c5ccc(OC(=O)N3CCc2ccccc2C3)cc45	18983470	1	Zhao et al. J Chem Inf Model. 2007;47(1):170–175. DOI:10.1021/ci600312d
1769	CN1CCC3=C(CC1)c2ccccc2Oc4ccccc34	68858	1	Zhao et al. J Chem Inf Model. 2007;47(1):170–175. DOI:10.1021/ci600312d
1770	CN1CCC3=C(CC1)c2ccccc2N(C)c4ccccc34	208930	1	Zhao et al. J Chem Inf Model. 2007;47(1):170–175. DOI:10.1021/ci600312d
1771	CN1CCC3=C(CC1)C2=CC(C#N)=CC=C2[S]C4=CC=CC=C34	193991	1	Shen et al. J Chem Inf Model. 2010;50(6):1034-1041. DOI: 10.1021/ci100104j
1772	CN1CCC3=C(C1)c2ccccc2Cc4ccccc34	5205	1	Zhao et al. J Chem Inf Model. 2007;47(1):170–175. DOI:10.1021/ci600312d
1773	CN1CCC3(O)C(C1)c2cccc(C)c2Oc4ccccc34	9860946	1	Zhao et al. J Chem Inf Model. 2007;47(1):170–175. DOI:10.1021/ci600312d
1774	CN1CCC24C3Oc5c(OC(C)=O)ccc(CC1C2C=CC3OC(C)=O)c45	3592	1	Zhao et al. J Chem Inf Model. 2007;47(1):170–175. DOI:10.1021/ci600312d
1775	CN1CCC24C3Oc5c(O)ccc(CC1C2C=CC3O)c45	4253	1	Zhao et al. J Chem Inf Model. 2007;47(1):170–175. DOI:10.1021/ci600312d
1776	CN1CCC24C3Oc5c(O)ccc(CC1C2(O)CCC3O)c45	627484	1	Zhao et al. J Chem Inf Model. 2007;47(1):170–175. DOI:10.1021/ci600312d
1777	CN1CCC24C3Oc5c(O)ccc(CC1C2(O)CCC3=O)c45	4639	1	Zhao et al. J Chem Inf Model. 2007;47(1):170–175. DOI:10.1021/ci600312d
1778	CN1CCC23C(C1)C(CC(=O)N2)C4=C(O3)C=CC(=C4)Cl	3053755	1	Shen et al. J Chem Inf Model. 2010;50(6):1034-1041. DOI: 10.1021/ci100104j
1779	CN1CCC2(C)CC(C1)Cc3ccc(O)cc23	3246	1	Zhao et al. J Chem Inf Model. 2007;47(1):170–175. DOI:10.1021/ci600312d
1780	CN1CCC=C(C1)C=NOC	9571002	1	Shen et al. J Chem Inf Model. 2010;50(6):1034-1041. DOI: 10.1021/ci100104j
1781	CN1CCC(CC1)OC3c2ccccc2CCc4ccccc34	70593	1	Zhao et al. J Chem Inf Model. 2007;47(1):170–175. DOI:10.1021/ci600312d
1782	CN1CCC(CC1)=C3c2ccccc2Sc4ccccc34	4822	1	Zhao et al. J Chem Inf Model. 2007;47(1):170–175. DOI:10.1021/ci600312d
1783	CN1CCC(CC1)=C3c2ccccc2Oc4ccc(Cl)cc34	43215	1	Zhao et al. J Chem Inf Model. 2007;47(1):170–175. DOI:10.1021/ci600312d
1784	CN1CCC(CC1)=C3c2ccccc2CCc4sccc34	27400	1	Zhao et al. J Chem Inf Model. 2007;47(1):170–175. DOI:10.1021/ci600312d
1785	CN1CCC(CC1)=C3c2ccccc2C(O)c4ccccc34	35758	1	Zhao et al. J Chem Inf Model. 2007;47(1):170–175. DOI:10.1021/ci600312d
1786	CN1CCC(C)(C1)CN3c2ccccc2Sc4ccccc34	208838	1	Zhao et al. J Chem Inf Model. 2007;47(1):170–175. DOI:10.1021/ci600312d
1787	CN1CC3C(C1)c2cc(Cl)ccc2Oc4ccccc34	9903970	1	Zhao et al. J Chem Inf Model. 2007;47(1):170–175. DOI:10.1021/ci600312d
1788	CN1Cc2c([C@@H](c3ccccc3)OCC1)cccc2	176540	1	Roy et al. ACS Omega. 2019; 4(16):16774-16780. DOI: 10.1021/acsomega.9b01512
1789	CN1CC[C@@]23C=4C=5C[C@@]1([H])[C@@]2([H])CCC[C@@]3([H])OC=4C(O)=CC=5	5362456	1	Shen et al. J Chem Inf Model. 2010;50(6):1034-1041. DOI: 10.1021/ci100104j
1790	CN1CC[C@@]2(C)C[C@@]([H])(C1)CC3=C/C=C(/O)C=C23	3042090	1	Shen et al. J Chem Inf Model. 2010;50(6):1034-1041. DOI: 10.1021/ci100104j
1791	CN1CC(CC2C1Cc3cn(C)c4cccc2c34)NS(=O)(=O)N(C)C	5251926	1	Zhao et al. J Chem Inf Model. 2007;47(1):170–175. DOI:10.1021/ci600312d
1792	CN1CC(CC2C1Cc3c[nH]c4cccc2c34)C(=O)NC8(C)OC7(O)C5CCCN5C(=O)C(Cc6ccccc6)N7C8=O	3066	0	Zhao et al. J Chem Inf Model. 2007;47(1):170–175. DOI:10.1021/ci600312d
1793	CN1CC(CC#N)CC2C1Cc3c[nH]c4cccc2c34	12782962	1	Zhao et al. J Chem Inf Model. 2007;47(1):170–175. DOI:10.1021/ci600312d
1794	CN1C2CCC1CC(C2)OC(c3ccccc3)c4ccccc4	2344	1	Zhao et al. J Chem Inf Model. 2007;47(1):170–175. DOI:10.1021/ci600312d
1795	CN1C2CCC1CC(C2)OC(=O)C(O)c3ccccc3	3623	1	Zhao et al. J Chem Inf Model. 2007;47(1):170–175. DOI:10.1021/ci600312d
1796	CN1C2CCC1CC(C2)OC(=O)C(CO)c3ccccc3	3661	1	Zhao et al. J Chem Inf Model. 2007;47(1):170–175. DOI:10.1021/ci600312d
1797	CN1C2CCC1CC(C2)OC(=O)C(C3=CC=CC=C3)O	5282593	1	Shen et al. J Chem Inf Model. 2010;50(6):1034-1041. DOI: 10.1021/ci100104j
1798	CN1C2CCC1CC(C2)OC(=O)C(C)(CO)c3ccccc3	71626	1	Zhao et al. J Chem Inf Model. 2007;47(1):170–175. DOI:10.1021/ci600312d
1799	CN1C2CCC1CC(C2)NC(=O)N3CC(C)(C)c4ccccc34	9883287	1	Zhao et al. J Chem Inf Model. 2007;47(1):170–175. DOI:10.1021/ci600312d
1800	CN1C2CCC1CC(C2)NC(=O)c5cn(C3CCCCC3)c4ccccc4c5=O	18957007	1	Zhao et al. J Chem Inf Model. 2007;47(1):170–175. DOI:10.1021/ci600312d
1801	CN1C[C@H]2N(c3c(cccc3)Cn3c2ccc3)CC1	76957707	1	Roy et al. ACS Omega. 2019; 4(16):16774-16780. DOI: 10.1021/acsomega.9b01512
1802	CN1C[C@H]2N(c3c(cccc3)Cc3c2cccc3)CC1	154315	1	Roy et al. ACS Omega. 2019; 4(16):16774-16780. DOI: 10.1021/acsomega.9b01512
1803	CN1C[C@@H]2N(c3ncccc3Cc3c2cccc3)CC1	3085219	1	Roy et al. ACS Omega. 2019; 4(16):16774-16780. DOI: 10.1021/acsomega.9b01512
1804	CN1C[C@@H]2[C@H](Nc3c2cc(C)cc3)CC1	6335626	1	Roy et al. ACS Omega. 2019; 4(16):16774-16780. DOI: 10.1021/acsomega.9b01512
1805	CN1C[C@@]([H])(CC#N)C[C@@]2([H])C=4C=CC=C3NC=C(C[C@@]12[H])C3=4	10264850	1	Shen et al. J Chem Inf Model. 2010;50(6):1034-1041. DOI: 10.1021/ci100104j
1806	CN1C[C@@]([H])(C[C@@]2([H])C=4C=CC=C3N(C)C=C(C[C@@]12[H])C3=4)N[S](=O)(=O)N(C)C	68848	1	Shen et al. J Chem Inf Model. 2010;50(6):1034-1041. DOI: 10.1021/ci100104j
1807	CN1C(CCCC1CC(=O)c2ccccc2)CC(O)c3ccccc3	3945	1	Zhao et al. J Chem Inf Model. 2007;47(1):170–175. DOI:10.1021/ci600312d
1808	CN1C(CCC1=O)c2cccnc2	408	1	Zhao et al. J Chem Inf Model. 2007;47(1):170–175. DOI:10.1021/ci600312d
1809	CN1C(=O)OC(C)(C)C1=O	5576	1	Zhao et al. J Chem Inf Model. 2007;47(1):170–175. DOI:10.1021/ci600312d
1810	CN1C(=O)CSC1=CC(=O)Nc2c(C)cccc2Cl	71189	1	Zhao et al. J Chem Inf Model. 2007;47(1):170–175. DOI:10.1021/ci600312d
1811	CN1C(=O)CC[C@@]1([H])C2=CC=CN=C2	854019	1	Shen et al. J Chem Inf Model. 2010;50(6):1034-1041. DOI: 10.1021/ci100104j
1812	CN1C(=O)CC(C1=O)c2ccccc2	6839	1	Zhao et al. J Chem Inf Model. 2007;47(1):170–175. DOI:10.1021/ci600312d
1813	CN1C(=O)CC(C)(C1=O)c1ccccc1	6476	1	Zhao et al. J Chem Inf Model. 2007;47(1):170–175. DOI:10.1021/ci600312d
1814	CN1C(=O)C[S]/C1=C/C(=O)N/C2=C(/C)C=C/C=C2/[Cl]	6436118	1	Shen et al. J Chem Inf Model. 2010;50(6):1034-1041. DOI: 10.1021/ci100104j
1815	CN1C(=NC(=O)C(=O)N1)SCC2=C(N3[C@@H]([C@@H](C3=O)NC(=O)/C(=N\OC)/C4=CSC(=N4)N)SC2)C(=O)O	5479530	0	Shen et al. J Chem Inf Model. 2010;50(6):1034-1041. DOI: 10.1021/ci100104j
1816	CN1[C@H]2[C@@H]3[C@](c4c(ccc(C)c4)C2)(CC1)CCCC3	6602336	1	Roy et al. ACS Omega. 2019; 4(16):16774-16780. DOI: 10.1021/acsomega.9b01512
1817	CN1[C@H](c2cnccc2)CCC1	89594	1	Roy et al. ACS Omega. 2019; 4(16):16774-16780. DOI: 10.1021/acsomega.9b01512
1818	CN1[C@H](c2ccccc2)Cc2c(N=C1C)cccc2	76956710	1	Roy et al. ACS Omega. 2019; 4(16):16774-16780. DOI: 10.1021/acsomega.9b01512
1819	CN1[C@@H](C)[C@@H](c2ccccc2)OCC1	6101744	1	Roy et al. ACS Omega. 2019; 4(16):16774-16780. DOI: 10.1021/acsomega.9b01512
1820	CN1[C@@]2([H])CC[C@@]1([H])C[C@@]([H])(C2)OC(=O)[C@@]([H])(CO)C3=CC=CC=C3	174174	1	Shen et al. J Chem Inf Model. 2010;50(6):1034-1041. DOI: 10.1021/ci100104j
1821	CN1(=O)C2CCC1CC(C2)OC(=O)C(CO)c3ccccc3	20710	1	Zhao et al. J Chem Inf Model. 2007;47(1):170–175. DOI:10.1021/ci600312d
1822	CN1(=O)[C@@]2([H])CC[C@@]1([H])C[C@@]([H])(C2)OC(=O)[C@@]([H])(CO)C3=CC=CC=C3	3000668	1	Shen et al. J Chem Inf Model. 2010;50(6):1034-1041. DOI: 10.1021/ci100104j
1823	CN[C@@]3([H])[C@@](O)([H])[C@@]2([H])O[C@@]([H])(O[C@@]1([H])[C@@](N)([H])C[C@@](N)([H])[C@@](O)([H])[C@@]1(O)[H])[C@@](N)([H])C[C@@]2([H])O[C@@]3([H])O[C@@]4([H])O[C@@]([H])(CO)[C@@](N)([H])[C@@](O)([H])[C@@]4(O)[H]	3081545	0	Shen et al. J Chem Inf Model. 2010;50(6):1034-1041. DOI: 10.1021/ci100104j
1824	CN[C@@]2([H])CC[C@@]([H])(C1=C/C=C(/[Cl])C([Cl])=C1)C3=CC=CC=C23	68617	1	Shen et al. J Chem Inf Model. 2010;50(6):1034-1041. DOI: 10.1021/ci100104j
1825	CN[C@@]2([H])C[C@@]([H])(C1=C/C=C(/[Cl])C([Cl])=C1)C3=CC=CC=C23	126280	1	Shen et al. J Chem Inf Model. 2010;50(6):1034-1041. DOI: 10.1021/ci100104j
1826	CN[C@@]1([H])[C@@](O)([H])[C@@](O)([H])[C@@]([H])(CO)O[C@@]1([H])O[C@@]2([H])[C@@]([H])(O[C@@](C)([H])[C@@]2(O)CO)O[C@@]3([H])[C@@](O)([H])[C@@](O)([H])[C@@]([H])(NC(N)=N)[C@@](O)([H])[C@@]3([H])NC(N)=N	439369	0	Shen et al. J Chem Inf Model. 2010;50(6):1034-1041. DOI: 10.1021/ci100104j
1827	CN[C@@]1([H])[C@@](O)([H])[C@@](O)([H])[C@@]([H])(CO)O[C@@]1([H])O[C@@]2([H])[C@@]([H])(O[C@@](C)([H])[C@@]2(O)C=O)O[C@@]3([H])[C@@](O)([H])[C@@](O)([H])[C@@]([H])(NC(N)=N)[C@@](O)([H])[C@@]3([H])NC(N)=N	19649	0	Shen et al. J Chem Inf Model. 2010;50(6):1034-1041. DOI: 10.1021/ci100104j
1828	CN[C@@]1([H])[C@@](O)([H])[C@@]([H])(OC[C@@]1(C)O)O[C@@]3([H])[C@@](N)([H])C[C@@](N)([H])[C@@]([H])(O[C@@]2([H])OC(=CC[C@@]2(N)[H])CN)[C@@]3(O)[H]	36119	0	Shen et al. J Chem Inf Model. 2010;50(6):1034-1041. DOI: 10.1021/ci100104j
1829	CN[C@@](C)([H])C/C1=C/C=CC=C1	10836	1	Shen et al. J Chem Inf Model. 2010;50(6):1034-1041. DOI: 10.1021/ci100104j
1830	CN/C2=N/C1=C/C=C(/[Cl])C=C1C(=N(=O)C2)C3=CC=CC=C3	2712	1	Shen et al. J Chem Inf Model. 2010;50(6):1034-1041. DOI: 10.1021/ci100104j
1831	CN(N=O)C(=O)NC1C(O)OC(CO)C(O)C1O	5300	0	Zhao et al. J Chem Inf Model. 2007;47(1):170–175. DOI:10.1021/ci600312d
1832	CN(CCOC(c1ccccc1)c2ccccc2)CC=Cc3ccccc3	193979	1	Zhao et al. J Chem Inf Model. 2007;47(1):170–175. DOI:10.1021/ci600312d
1833	CN(CCOC([H])(C1=CC=CC=C1)C2=CC=CC=C2)C/C=C/C3=C/C=CC=C3	6443800	1	Shen et al. J Chem Inf Model. 2010;50(6):1034-1041. DOI: 10.1021/ci100104j
1834	CN(CCCO/C1=C/C=C(/[Cl])C=C1[Cl])CC#C	4380	1	Shen et al. J Chem Inf Model. 2010;50(6):1034-1041. DOI: 10.1021/ci100104j
1835	CN(CCCN2c1ccccc1CCc3ccccc23)CC(=O)c4ccc(Cl)cc4	3947	1	Zhao et al. J Chem Inf Model. 2007;47(1):170–175. DOI:10.1021/ci600312d
1836	CN(CCc2cc3cccc4CCc1ccccc1n2c34)Cc5ccccc5	65468	1	Zhao et al. J Chem Inf Model. 2007;47(1):170–175. DOI:10.1021/ci600312d
1837	CN(Cc2cnc1nc(N)nc(N)c1n2)c3ccc(cc3)C(=O)NC(CCC(O)=O)C(O)=O	4112	0	Zhao et al. J Chem Inf Model. 2007;47(1):170–175. DOI:10.1021/ci600312d
1838	CN(CC#C)C/C1=C/C=CC=C1	4688	1	Shen et al. J Chem Inf Model. 2010;50(6):1034-1041. DOI: 10.1021/ci100104j
1839	CN(C2CCC1(CCCO1)CC2N3CCCC3)C(=O)Cc4ccc(Cl)c(Cl)c4	5620	1	Zhao et al. J Chem Inf Model. 2007;47(1):170–175. DOI:10.1021/ci600312d
1840	CN(C1CCN(CC1)CC(O)COc2ccc(F)cc2)c4nc3ccccc3s4	59823	1	Zhao et al. J Chem Inf Model. 2007;47(1):170–175. DOI:10.1021/ci600312d
1841	CN(C1CCCCC1N2CCCC2)C(=O)Cc3ccc(Cl)c(Cl)c3	5619	1	Zhao et al. J Chem Inf Model. 2007;47(1):170–175. DOI:10.1021/ci600312d
1842	CN(C/C2=C/N=C1/N=C(/N)N=C(N)C1=N2)C3=CC=C(C=C3)C(=O)N[C@@]([H])(CCC(O)=O)C(O)=O	126941	0	Shen et al. J Chem Inf Model. 2010;50(6):1034-1041. DOI: 10.1021/ci100104j
1843	CN(C)S(=O)(=O)c4ccc3Sc1ccccc1N(CCCN2CCC(CCO)CC2)c3c4	62867	1	Zhao et al. J Chem Inf Model. 2007;47(1):170–175. DOI:10.1021/ci600312d
1844	CN(C)N=Nc1[nH]cnc1C(N)=O	65856	1	Zhao et al. J Chem Inf Model. 2007;47(1):170–175. DOI:10.1021/ci600312d
1845	CN(C)CCON=C2c1ccccc1CCc3ccccc23	21087	1	Zhao et al. J Chem Inf Model. 2007;47(1):170–175. DOI:10.1021/ci600312d
1846	CN(C)CCOC2=Cc1ccccc1Sc3ccc(Cl)cc23	5736	1	Zhao et al. J Chem Inf Model. 2007;47(1):170–175. DOI:10.1021/ci600312d
1847	CN(C)CCOC1(CC2CCC1(C)C2(C)C)Cc3ccccc3	3052772	1	Zhao et al. J Chem Inf Model. 2007;47(1):170–175. DOI:10.1021/ci600312d
1848	CN(C)CCOC(c1ccccc1)c2ccccc2C(C)(C)C	21916	1	Zhao et al. J Chem Inf Model. 2007;47(1):170–175. DOI:10.1021/ci600312d
1849	CN(C)CCOC(c1ccccc1)c2ccccc2C	4601	0	Zhao et al. J Chem Inf Model. 2007;47(1):170–175. DOI:10.1021/ci600312d
1850	CN(C)CCOC(c1ccccc1)c2ccccc2	3100	1	Zhao et al. J Chem Inf Model. 2007;47(1):170–175. DOI:10.1021/ci600312d
1851	CN(C)CCOC(c1ccccc1)c2ccc(Br)cc2	2444	1	Zhao et al. J Chem Inf Model. 2007;47(1):170–175. DOI:10.1021/ci600312d
1852	CN(C)CCOC(C)(c1ccccc1)c2ccccn2	3162	1	Zhao et al. J Chem Inf Model. 2007;47(1):170–175. DOI:10.1021/ci600312d
1853	CN(C)CCOC(C)(c1ccccc1)c2ccc(Cl)cc2	6475	1	Zhao et al. J Chem Inf Model. 2007;47(1):170–175. DOI:10.1021/ci600312d
1854	CN(C)CCOC(=O)CCC1CCCCC1	71875	1	Zhao et al. J Chem Inf Model. 2007;47(1):170–175. DOI:10.1021/ci600312d
1855	CN(C)CCO	7902	1	Zhao et al. J Chem Inf Model. 2007;47(1):170–175. DOI:10.1021/ci600312d
1856	CN(C)CCN2C(=O)c1ccccc1N(C)c3ccccc23	9419	1	Zhao et al. J Chem Inf Model. 2007;47(1):170–175. DOI:10.1021/ci600312d
1857	CN(C)CCn1nnnc1SCC2=C(N4C(SC2)C(NC(=O)Cc3csc(N)n3)C4=O)C(O)=O	2635	0	Zhao et al. J Chem Inf Model. 2007;47(1):170–175. DOI:10.1021/ci600312d
1858	CN(C)CCN1N=N/N=C1/[S]CC=2C[S][C@@]3([H])N(C=2C(O)=O)C(=O)[C@@]3([H])NC(=O)C/C4=C/[S]C(N)=N4	43708	0	Shen et al. J Chem Inf Model. 2010;50(6):1034-1041. DOI: 10.1021/ci100104j
1859	CN(C)CCn1cnc2n(C)c(=O)n(C)c(=O)c12	10612	1	Zhao et al. J Chem Inf Model. 2007;47(1):170–175. DOI:10.1021/ci600312d
1860	CN(C)CCN1CCN(C1=O)c2cccc(Cl)c2	23728	1	Zhao et al. J Chem Inf Model. 2007;47(1):170–175. DOI:10.1021/ci600312d
1861	CN(C)CCN1C(=O)CC(Sc2ccccc12)c1ccccc1	22107	1	Zhao et al. J Chem Inf Model. 2007;47(1):170–175. DOI:10.1021/ci600312d
1862	CN(C)CCN(Cc1cccs1)c2ccccn2	4098	1	Zhao et al. J Chem Inf Model. 2007;47(1):170–175. DOI:10.1021/ci600312d
1863	CN(C)CCN(C)n2cc(c1ccccc1)c3ccccc23	42510	1	Zhao et al. J Chem Inf Model. 2007;47(1):170–175. DOI:10.1021/ci600312d
1864	CN(C)CCCN2Cc1ccccc1Cc3ccccc23	299322	1	Zhao et al. J Chem Inf Model. 2007;47(1):170–175. DOI:10.1021/ci600312d
1865	CN(C)CCCN2Cc1ccccc1C(=C)c3ccccc23	208922	1	Zhao et al. J Chem Inf Model. 2007;47(1):170–175. DOI:10.1021/ci600312d
1866	CN(C)CCCn2cc(c1ccccc1)c(n2)c3ccccc3	54567	1	Zhao et al. J Chem Inf Model. 2007;47(1):170–175. DOI:10.1021/ci600312d
1867	CN(C)CCCn2c1CCCCCCc1c3ccccc23	21722	1	Zhao et al. J Chem Inf Model. 2007;47(1):170–175. DOI:10.1021/ci600312d
1868	CN(C)CCCN2c1ccccc1Sc3cccnc23	14670	1	Zhao et al. J Chem Inf Model. 2007;47(1):170–175. DOI:10.1021/ci600312d
1869	CN(C)CCCN2c1ccccc1Sc3ccccc23	4926	1	Zhao et al. J Chem Inf Model. 2007;47(1):170–175. DOI:10.1021/ci600312d
1870	CN(C)CCCN2c1ccccc1Sc3ccc(Cl)cc23	2726	1	Zhao et al. J Chem Inf Model. 2007;47(1):170–175. DOI:10.1021/ci600312d
1871	CN(C)CCCN2c1ccccc1Sc3ccc(cc23)C(F)(F)F	5568	1	Zhao et al. J Chem Inf Model. 2007;47(1):170–175. DOI:10.1021/ci600312d
1872	CN(C)CCCN2c1ccccc1Sc3ccc(cc23)C(C)=O	6077	1	Zhao et al. J Chem Inf Model. 2007;47(1):170–175. DOI:10.1021/ci600312d
1873	CN(C)CCCN2c1ccccc1CCc3ccccc23	3696	1	Zhao et al. J Chem Inf Model. 2007;47(1):170–175. DOI:10.1021/ci600312d
1874	CN(C)CCCN2c1ccccc1CCc3ccc(Cl)cc23	2801	1	Zhao et al. J Chem Inf Model. 2007;47(1):170–175. DOI:10.1021/ci600312d
1875	CN(C)CCCN2c1ccccc1C=Cc3sccc23	216992	1	Zhao et al. J Chem Inf Model. 2007;47(1):170–175. DOI:10.1021/ci600312d
1876	CN(C)CCCN2c1ccccc1C=Cc3ccccc23	67534	1	Zhao et al. J Chem Inf Model. 2007;47(1):170–175. DOI:10.1021/ci600312d
1877	CN(C)CCCN2c1ccccc1C(C)(C)c3ccccc23	94280	1	Zhao et al. J Chem Inf Model. 2007;47(1):170–175. DOI:10.1021/ci600312d
1878	CN(C)CCCN2c1ccccc1C(=Nc3cccnc23)c4ccccc4	54961	1	Zhao et al. J Chem Inf Model. 2007;47(1):170–175. DOI:10.1021/ci600312d
1879	CN(C)CCCN2C1=CC=CC=C1CCC3=C/C=C(/C#N)C=C23	48126	1	Shen et al. J Chem Inf Model. 2010;50(6):1034-1041. DOI: 10.1021/ci100104j
1880	CN(C)CCCn2c(=O)n(c1ccccc1)c3cc(Cl)ccc23	20883	1	Zhao et al. J Chem Inf Model. 2007;47(1):170–175. DOI:10.1021/ci600312d
1881	CN(C)CCCn2c(=O)c1ccccc1c3ccccc23	28692	1	Zhao et al. J Chem Inf Model. 2007;47(1):170–175. DOI:10.1021/ci600312d
1882	CN(C)CCCN1c2ccccc2CC(=O)c2ccccc12	28424	1	Zhao et al. J Chem Inf Model. 2007;47(1):170–175. DOI:10.1021/ci600312d
1883	CN(C)CCCC2c1ccccc1Nc3ccc(Cl)cc23	21382	1	Zhao et al. J Chem Inf Model. 2007;47(1):170–175. DOI:10.1021/ci600312d
1884	CN(C)CCC2(CCc1ccccc1C2=O)c3ccccc3	174100	1	Zhao et al. J Chem Inf Model. 2007;47(1):170–175. DOI:10.1021/ci600312d
1885	CN(C)CCc1c[nH]c2cccc(OP(O)(O)=O)c12	10624	1	Zhao et al. J Chem Inf Model. 2007;47(1):170–175. DOI:10.1021/ci600312d
1886	CN(C)CCC1(C=Cc2ccccc12)c3ccccc3	23878	1	Zhao et al. J Chem Inf Model. 2007;47(1):170–175. DOI:10.1021/ci600312d
1887	CN(C)CCC1(C)OCCC2=C1Cc3ccccc23	431429	1	Zhao et al. J Chem Inf Model. 2007;47(1):170–175. DOI:10.1021/ci600312d
1888	CN(C)CCC=C2c1ccccc1Sc3ccccc23	71115	1	Zhao et al. J Chem Inf Model. 2007;47(1):170–175. DOI:10.1021/ci600312d
1889	CN(C)CCC=C2c1ccccc1CSc3ccccc23	3155	1	Zhao et al. J Chem Inf Model. 2007;47(1):170–175. DOI:10.1021/ci600312d
1890	CN(C)CCC=C2c1ccccc1COc3ccccc23	3158	1	Zhao et al. J Chem Inf Model. 2007;47(1):170–175. DOI:10.1021/ci600312d
1891	CN(C)CCC=C2c1ccccc1CNc3cc(Cl)ccc23	77910625	1	Zhao et al. J Chem Inf Model. 2007;47(1):170–175. DOI:10.1021/ci600312d
1892	CN(C)CCC=C2c1ccccc1CCc3ccccc23	2160	1	Zhao et al. J Chem Inf Model. 2007;47(1):170–175. DOI:10.1021/ci600312d
1893	CN(C)CCC=C2c1ccccc1C=Cc3ccccc23	2895	1	Zhao et al. J Chem Inf Model. 2007;47(1):170–175. DOI:10.1021/ci600312d
1894	CN(C)CCC=C2c1ccccc1C(C)(C)c3ccccc23	25382	1	Zhao et al. J Chem Inf Model. 2007;47(1):170–175. DOI:10.1021/ci600312d
1895	CN(C)CCC[C@@]1(OCC2=CC(C#N)=CC=C12)C3=C/C=C(/[F])C=C3	2771	1	Shen et al. J Chem Inf Model. 2010;50(6):1034-1041. DOI: 10.1021/ci100104j
1896	CN(C)CCC(C1CCCCC1)c2ccccc2	31041	1	Zhao et al. J Chem Inf Model. 2007;47(1):170–175. DOI:10.1021/ci600312d
1897	CN(C)CCC(=O)COc1ccc(Cl)cc1	NA	1	Zhao et al. J Chem Inf Model. 2007;47(1):170–175. DOI:10.1021/ci600312d
1898	CN(C)CCC(=O)CO/C1=C/C=C(/[Cl])C=C1	4039	1	Shen et al. J Chem Inf Model. 2010;50(6):1034-1041. DOI: 10.1021/ci100104j
1899	CN(C)Cc3nnc4CN=C(c1ccccc1)c2cc(Cl)ccc2n34	37632	1	Zhao et al. J Chem Inf Model. 2007;47(1):170–175. DOI:10.1021/ci600312d
1900	CN(C)Cc3ccc(CSCCNc2nc(=O)c(Cc1ccc(C)nc1)c[nH]2)o3	4375468	0	Zhao et al. J Chem Inf Model. 2007;47(1):170–175. DOI:10.1021/ci600312d
1901	CN(C)CC2=Cc1ccccc1Sc3ccccc23	71644	1	Zhao et al. J Chem Inf Model. 2007;47(1):170–175. DOI:10.1021/ci600312d
1902	CN(C)Cc1oc(cc1)CSCCNC=1NC=C(CN1)Cc1cnc(cc1)C	NA	0	Zhao et al. J Chem Inf Model. 2007;47(1):170–175. DOI:10.1021/ci600312d
1903	CN(C)CC1COC3(O1)c2ccccc2COc4ccccc34	68674	1	Zhao et al. J Chem Inf Model. 2007;47(1):170–175. DOI:10.1021/ci600312d
1904	CN(C)CC=C(c1ccc(Br)cc1)c2cccnc2	41987	1	Zhao et al. J Chem Inf Model. 2007;47(1):170–175. DOI:10.1021/ci600312d
1905	CN(C)CC=1OC(=CC=1)C[S]CCN/C2=N/C=C(CN2)C/C3=C/N=C(/C)C=C3	NA	0	Shen et al. J Chem Inf Model. 2010;50(6):1034-1041. DOI: 10.1021/ci100104j
1906	CN(C)CC(Oc1ccccc1)Oc2ccccc2	36109	1	Zhao et al. J Chem Inf Model. 2007;47(1):170–175. DOI:10.1021/ci600312d
1907	CN(C)CC(O)C(c1ccccc1)c2cccc(Cl)c2	10108256	1	Zhao et al. J Chem Inf Model. 2007;47(1):170–175. DOI:10.1021/ci600312d
1908	CN(C)CC(CN2c1ccccc1Sc3ccccc23)N(C)C	19392	1	Zhao et al. J Chem Inf Model. 2007;47(1):170–175. DOI:10.1021/ci600312d
1909	CN(C)CC(=O)N2c1ccccc1Sc3ccccc23	68846	1	Zhao et al. J Chem Inf Model. 2007;47(1):170–175. DOI:10.1021/ci600312d
1910	CN(C)CC(=O)C=C2c1ccccc1CCc3ccccc23	71935	1	Zhao et al. J Chem Inf Model. 2007;47(1):170–175. DOI:10.1021/ci600312d
1911	CN(C)CC#C/C=C2/C1=CC=CC=C1C=CC3=CC=CC=C23	71397	1	Shen et al. J Chem Inf Model. 2010;50(6):1034-1041. DOI: 10.1021/ci100104j
1912	CN(C)C4C3CC2Cc1ccc(N)c(O)c1C(=O)C2=C(O)C3(O)C(=O)C(=C4O)C(N)=O	54707148	0	Zhao et al. J Chem Inf Model. 2007;47(1):170–175. DOI:10.1021/ci600312d
1913	CN(C)C4C3CC2Cc1c(ccc(O)c1C(=O)C2=C(O)C3(O)C(=O)C(=C4O)C(N)=O)N(C)C	54687237	0	Zhao et al. J Chem Inf Model. 2007;47(1):170–175. DOI:10.1021/ci600312d
1914	CN(C)C4C3CC2Cc1c(ccc(O)c1C(=O)C2=C(O)C3(O)C(=O)C(=C4O)C(N)=O)N(=O)=O	54707151	0	Zhao et al. J Chem Inf Model. 2007;47(1):170–175. DOI:10.1021/ci600312d
1915	CN(C)C4C3CC2C(O)c1cccc(O)c1C(=O)C2=C(O)C3(O)C(=O)C(=C4O)C(N)=O	54680095	0	Zhao et al. J Chem Inf Model. 2007;47(1):170–175. DOI:10.1021/ci600312d
1916	CN(C)C4C3CC2C(O)c1c(Cl)ccc(O)c1C(=O)C2=C(O)C3(O)C(=O)C(=C4O)C(N)=O	54680103	0	Zhao et al. J Chem Inf Model. 2007;47(1):170–175. DOI:10.1021/ci600312d
1917	CN(C)C4C3C(O)C2C(=C)c1cccc(O)c1C(=O)C2=C(O)C3(O)C(=O)C(=C4O)C(N)=O	54676011	0	Zhao et al. J Chem Inf Model. 2007;47(1):170–175. DOI:10.1021/ci600312d
1918	CN(C)C4C3C(O)C2C(=C)c1c(Cl)ccc(O)c1C(=O)C2=C(O)C3(O)C(=O)C(=C4O)C(N)=O	54684337	0	Zhao et al. J Chem Inf Model. 2007;47(1):170–175. DOI:10.1021/ci600312d
1919	CN(C)C3CCc2[nH]c1c(F)cc(F)cc1c2C3	38531	1	Zhao et al. J Chem Inf Model. 2007;47(1):170–175. DOI:10.1021/ci600312d
1920	CN(C)C2C1CC7C(=C(O)C1(O)C(=O)C(=C2O)C(=O)NCNC(C(=O)NC4C3SC(C)(C)C(N3C4=O)C(O)=O)c5ccccc5)C(=O)c6c(O)cccc6C7(C)O	54716881	0	Zhao et al. J Chem Inf Model. 2007;47(1):170–175. DOI:10.1021/ci600312d
1921	CN(C)C2C1CC5C(=C(O)C1(O)C(=O)C(=C2O)C(=O)NCN3CCN(CCO)CC3)C(=O)c4c(O)cccc4C5(C)O	54688706	0	Zhao et al. J Chem Inf Model. 2007;47(1):170–175. DOI:10.1021/ci600312d
1922	CN(C)C2C1CC5C(=C(O)C1(O)C(=O)C(=C2O)C(=O)NCN3CCN(CC3)C(=N)NC(N)=N)C(=O)c4c(O)cccc4C5(C)O	54686186	0	Zhao et al. J Chem Inf Model. 2007;47(1):170–175. DOI:10.1021/ci600312d
1923	CN(C)C2C1CC5C(=C(O)C1(O)C(=O)C(=C2O)C(=O)NCN3CCCC3)C(=O)c4c(O)cccc4C5(C)O	54687414	0	Zhao et al. J Chem Inf Model. 2007;47(1):170–175. DOI:10.1021/ci600312d
1924	CN(C)C2C1CC5C(=C(O)C1(O)C(=O)C(=C2O)C(=O)NCN3CCCC(C3)C(O)=O)C(=O)c4c(O)cccc4C5(C)O	54688708	0	Zhao et al. J Chem Inf Model. 2007;47(1):170–175. DOI:10.1021/ci600312d
1925	CN(C)C2C1CC5C(=C(O)C1(O)C(=O)C(=C2O)C(=O)NC(N3CCN(CCO)CC3)C(O)=O)C(=O)c4c(O)cccc4C5(C)O	54708152	0	Zhao et al. J Chem Inf Model. 2007;47(1):170–175. DOI:10.1021/ci600312d
1926	CN(C)C2C1CC4C(=C(O)C1(O)C(=O)C(=C2O)C(N)=O)C(=O)c3c(O)cccc3C4(C)O	54685734	0	Zhao et al. J Chem Inf Model. 2007;47(1):170–175. DOI:10.1021/ci600312d
1927	CN(C)C2C1CC4C(=C(O)C1(O)C(=O)C(=C2O)C(N)=O)C(=O)c3c(O)ccc(Cl)c3C4(C)O	54677440	0	Zhao et al. J Chem Inf Model. 2007;47(1):170–175. DOI:10.1021/ci600312d
1928	CN(C)C2C1CC4C(=C(O)C1(O)C(=O)C(=C2O)C(=O)NCO)C(=O)c3c(O)ccc(Cl)c3C4(C)O	76169525	0	Zhao et al. J Chem Inf Model. 2007;47(1):170–175. DOI:10.1021/ci600312d
1929	CN(C)C2C1CC4C(=C(O)C1(O)C(=O)C(=C2O)C(=O)NCNCCCCC(N)C(O)=O)C(=O)c3c(O)cccc3C4(C)O	54724371	0	Zhao et al. J Chem Inf Model. 2007;47(1):170–175. DOI:10.1021/ci600312d
1930	CN(C)C2C1C(O)C4C(=C(O)C1(O)C(=O)C(=C2O)C(N)=O)C(=O)c3c(O)cccc3C4(C)O	54686003	0	Zhao et al. J Chem Inf Model. 2007;47(1):170–175. DOI:10.1021/ci600312d
1931	CN(C)c2c(C)n(C)n(c1ccccc1)c2=O	6009	1	Zhao et al. J Chem Inf Model. 2007;47(1):170–175. DOI:10.1021/ci600312d
1932	CN(C)c1cnccn1	23483	1	Zhao et al. J Chem Inf Model. 2007;47(1):170–175. DOI:10.1021/ci600312d
1933	CN(C)C1CCc2[nH]c3ccccc3c2C1	36082	1	Zhao et al. J Chem Inf Model. 2007;47(1):170–175. DOI:10.1021/ci600312d
1934	CN(C)C1C2CC3C(=C(O)C2(O)C(=O)C(=C1O)C(=O)NCN(C)CCN(C)CNC(=O)C1=C(O)C(C2CC4C(=C(O)C2(O)C1=O)C(=O)c1c(cccc1C4(C)O)O)N(C)C)C(=O)c1c(cccc1C3(C)O)O	54720851	0	Zhao et al. J Chem Inf Model. 2007;47(1):170–175. DOI:10.1021/ci600312d
1935	CN(C)C1=NC(=O)C(O1)c1ccccc1	12602	1	Zhao et al. J Chem Inf Model. 2007;47(1):170–175. DOI:10.1021/ci600312d
1936	CN(C)C[C@@](O)([H])[C@@]([H])(C1=CC=CC=C1)C2=CC=CC([Cl])=C2	71985	1	Shen et al. J Chem Inf Model. 2010;50(6):1034-1041. DOI: 10.1021/ci100104j
1937	CN(C)C/C=C(/C1=C/C=C(/[Br])C=C1)C2=CC=CN=C2	5365247	1	Shen et al. J Chem Inf Model. 2010;50(6):1034-1041. DOI: 10.1021/ci100104j
1938	CN(C)C(CCOc1cccc2ccccc12)c3ccccc3	6093437	1	Zhao et al. J Chem Inf Model. 2007;47(1):170–175. DOI:10.1021/ci600312d
1939	CN(C)C(C)(CO)Cc1ccc(Cl)c(Cl)c1	131074	1	Zhao et al. J Chem Inf Model. 2007;47(1):170–175. DOI:10.1021/ci600312d
1940	CN(C)C(=O)OC3N=C(c1ccccc1)c2cc(Cl)ccc2N(C)C3=O	37367	1	Zhao et al. J Chem Inf Model. 2007;47(1):170–175. DOI:10.1021/ci600312d
1941	CN(C)C(=O)COC2c1ccccc1CCc3ccccc23	34624	1	Zhao et al. J Chem Inf Model. 2007;47(1):170–175. DOI:10.1021/ci600312d
1942	CN(C)C(=O)CCNc1ccc(Br)cc1	68839	1	Zhao et al. J Chem Inf Model. 2007;47(1):170–175. DOI:10.1021/ci600312d
1943	CN(C)C(=O)Cc1c(nc2ccc(C)cn12)c3ccc(C)cc3	5732	1	Zhao et al. J Chem Inf Model. 2007;47(1):170–175. DOI:10.1021/ci600312d
1944	CN(C)C(=O)C2(CCN(CCCC(=O)c1ccc(F)cc1)CC2)c3ccc(Cl)cc3	71101	1	Zhao et al. J Chem Inf Model. 2007;47(1):170–175. DOI:10.1021/ci600312d
1945	CN(C)C(=O)c1nc(CNC(=O)CN)n(n1)c2ccc(Cl)cc2C(=O)c3ccccc3Cl	5069	1	Zhao et al. J Chem Inf Model. 2007;47(1):170–175. DOI:10.1021/ci600312d
1946	CN(C)C(=O)C(CCN1CCC(O)(CC1)c2ccc(Cl)cc2)(c3ccccc3)c4ccccc4	3955	0	Zhao et al. J Chem Inf Model. 2007;47(1):170–175. DOI:10.1021/ci600312d
1947	CN(C)[C@@]3([H])C(O)=C(C(=O)[C@@]4(O)C(O)=C2C(=O)C1=C(O)C=CC=C1[C@@](C)(O)[C@@]2([H])C[C@@]34[H])C(N)=O	54675776	0	Shen et al. J Chem Inf Model. 2010;50(6):1034-1041. DOI: 10.1021/ci100104j
1948	CN(C)[C@@]3([H])C(O)=C(C(=O)[C@@]4(O)C(O)=C2C(=O)C1=C(O)C=CC=C1[C@@](C)(O)[C@@]2([H])C[C@@]34[H])C(=O)NCN5CCN(CCO)CC5	54686184	0	Shen et al. J Chem Inf Model. 2010;50(6):1034-1041. DOI: 10.1021/ci100104j
1949	CN(C)[C@@]3([H])C(O)=C(C(=O)[C@@]4(O)C(O)=C2C(=O)C1=C(O)C=CC=C1[C@@](C)(O)[C@@]2([H])C[C@@]34[H])C(=O)NCN5CCN(CC5)C(=N)NC(N)=N	54688683	0	Shen et al. J Chem Inf Model. 2010;50(6):1034-1041. DOI: 10.1021/ci100104j
1950	CN(C)[C@@]3([H])C(O)=C(C(=O)[C@@]4(O)C(O)=C2C(=O)C1=C(O)C=CC=C1[C@@](C)(O)[C@@]2([H])C[C@@]34[H])C(=O)NCN5CCCC5	54682938	0	Shen et al. J Chem Inf Model. 2010;50(6):1034-1041. DOI: 10.1021/ci100104j
1951	CN(C)[C@@]3([H])C(O)=C(C(=O)[C@@]4(O)C(O)=C2C(=O)C1=C(O)C=CC=C1[C@@](C)(O)[C@@]2([H])C[C@@]34[H])C(=O)NCN5CCC[C@@]([H])(C5)C(O)=O	54688697	0	Shen et al. J Chem Inf Model. 2010;50(6):1034-1041. DOI: 10.1021/ci100104j
1952	CN(C)[C@@]3([H])C(O)=C(C(=O)[C@@]4(O)C(O)=C2C(=O)C1=C(O)C=CC=C1[C@@](C)(O)[C@@]2([H])C[C@@]34[H])C(=O)NCN[C@@]([H])(C(=O)N[C@@]5([H])C(=O)N6[C@@]5([H])[S]C(C)(C)[C@@]6([H])C(O)=O)C7=CC=CC=C7	76972772	0	Shen et al. J Chem Inf Model. 2010;50(6):1034-1041. DOI: 10.1021/ci100104j
1953	CN(C)[C@@]3([H])C(O)=C(C(=O)[C@@]4(O)C(O)=C2C(=O)C1=C(O)C=CC=C1[C@@](C)(O)[C@@]2([H])C[C@@]34[H])C(=O)NCN(C)CCN(C)CNC(=O)C6=C(O)[C@@]([H])(N(C)C)[C@@]5([H])C[C@@]8([H])C(=C(O)[C@@]5(O)C6=O)C(=O)C7=C(O)C=CC=C7[C@@]8(C)O	54680278	0	Shen et al. J Chem Inf Model. 2010;50(6):1034-1041. DOI: 10.1021/ci100104j
1954	CN(C)[C@@]3([H])C(O)=C(C(=O)[C@@]4(O)C(O)=C2C(=O)C1=C(O)C=CC=C1[C@@](C)(O)[C@@]2([H])C[C@@]34[H])C(=O)N[C@@]([H])(N5CCN(CCO)CC5)C(O)=O	54693001	0	Shen et al. J Chem Inf Model. 2010;50(6):1034-1041. DOI: 10.1021/ci100104j
1955	CN(C)[C@@]3([H])C(O)=C(C(=O)[C@@]4(O)C(O)=C2C(=O)C1=C(O)C=CC=C1[C@@](C)(O)[C@@]2([H])[C@@](O)([H])[C@@]34[H])C(N)=O	54675779	0	Shen et al. J Chem Inf Model. 2010;50(6):1034-1041. DOI: 10.1021/ci100104j
1956	CN(C)[C@@]3([H])C(O)=C(C(=O)[C@@]4(O)C(O)=C2C(=O)C1=C(O)C=CC([Cl])=C1[C@@](C)(O)[C@@]2([H])C[C@@]34[H])C(N)=O	54675777	0	Shen et al. J Chem Inf Model. 2010;50(6):1034-1041. DOI: 10.1021/ci100104j
1957	CN(C)[C@@]3([H])C(O)=C(C(=O)[C@@]4(O)C(O)=C2C(=O)C1=C(O)C=CC([Cl])=C1[C@@](C)(O)[C@@]2([H])C[C@@]34[H])C(=O)NCO	54680675	0	Shen et al. J Chem Inf Model. 2010;50(6):1034-1041. DOI: 10.1021/ci100104j
1958	CN(C)[C@@]3([H])C(O)=C(C(=O)[C@@]4(O)C(O)=C2C(=O)C=1C(=CC=CC=1O)C(=C)[C@@]2([H])[C@@](O)([H])[C@@]34[H])C(N)=O	54675785	0	Shen et al. J Chem Inf Model. 2010;50(6):1034-1041. DOI: 10.1021/ci100104j
1959	CN(C)[C@@]3([H])C(O)=C(C(=O)[C@@]4(O)C(O)=C2C(=O)C=1C(=CC=CC=1O)[C@@](O)([H])[C@@]2([H])C[C@@]34[H])C(N)=O	54682469	0	Shen et al. J Chem Inf Model. 2010;50(6):1034-1041. DOI: 10.1021/ci100104j
1960	CN(C)[C@@]3([H])C(O)=C(C(=O)[C@@]4(O)C(O)=C2C(=O)C=1/C(=C(/[Cl])C=CC=1O)[C@@](O)([H])[C@@]2([H])C[C@@]34[H])C(N)=O	54680690	0	Shen et al. J Chem Inf Model. 2010;50(6):1034-1041. DOI: 10.1021/ci100104j
1961	CN(C)[C@@]2([H])C(O)=C(C(=O)[C@@]3(O)C(O)=C1C(=O)C=4C(C[C@@]1([H])C[C@@]23[H])=C/C=C(/N)C=4O)C(N)=O	54688693	0	Shen et al. J Chem Inf Model. 2010;50(6):1034-1041. DOI: 10.1021/ci100104j
1962	CN(C)[C@@]2([H])C(O)=C(C(=O)[C@@]3(O)C(O)=C1C(=O)C=4C(C[C@@]1([H])C[C@@]23[H])=C(C=CC=4O)N(C)C)C(N)=O	54675783	0	Shen et al. J Chem Inf Model. 2010;50(6):1034-1041. DOI: 10.1021/ci100104j
1963	CN(C)[C@@]2([H])C(O)=C(C(=O)[C@@]3(O)C(O)=C1C(=O)C=4C(C[C@@]1([H])C[C@@]23[H])=C(C=CC=4O)N(=O)=O)C(N)=O	54688694	0	Shen et al. J Chem Inf Model. 2010;50(6):1034-1041. DOI: 10.1021/ci100104j
1964	CN(C)[C@@]2([H])C(O)=C(C(=O)[C@@]3(O)C(O)=C1C(=O)C=4C(C(=C)[C@@]1([H])[C@@](O)([H])[C@@]23[H])=C([Cl])C=CC=4O)C(N)=O	54676539	0	Shen et al. J Chem Inf Model. 2010;50(6):1034-1041. DOI: 10.1021/ci100104j
1965	CN(C)[C@@]([H])(CCO/C1=C/C=CC2=CC=CC=C12)C3=CC=CC=C3	71353	1	Shen et al. J Chem Inf Model. 2010;50(6):1034-1041. DOI: 10.1021/ci100104j
1966	CN(C)(=O)CCCN2c1ccccc1CCc3ccccc23	65589	1	Zhao et al. J Chem Inf Model. 2007;47(1):170–175. DOI:10.1021/ci600312d
1967	CN(C)(=O)CCC=C2c1ccccc1CCc3ccccc23	20313	1	Zhao et al. J Chem Inf Model. 2007;47(1):170–175. DOI:10.1021/ci600312d
1968	CN(C)(=O)CCC=C2c1ccccc1C=Cc3c(Cl)cccc23	68694	1	Zhao et al. J Chem Inf Model. 2007;47(1):170–175. DOI:10.1021/ci600312d
1969	CN(C(CN1CCCC1)c2ccccc2)C(=O)Cc3ccc(Cl)c(Cl)c3	4545429	1	Zhao et al. J Chem Inf Model. 2007;47(1):170–175. DOI:10.1021/ci600312d
1970	CN(C(CN1CCC(O)C1)c2ccccc2)C(=O)C(c3ccccc3)c4ccccc4	9823095	1	Zhao et al. J Chem Inf Model. 2007;47(1):170–175. DOI:10.1021/ci600312d
1971	CN(C(=O)CNCC(C)=C)c1ccc(Cl)cc1C(=O)c2ccccc2	68903	1	Zhao et al. J Chem Inf Model. 2007;47(1):170–175. DOI:10.1021/ci600312d
1972	CN(C(=O)CNC1CC1)c2ccc(Cl)cc2C(=O)c3ccccc3Cl	193989	1	Zhao et al. J Chem Inf Model. 2007;47(1):170–175. DOI:10.1021/ci600312d
1973	CN(C(=O)CNC(=O)CN)c1ccc(Cl)cc1C(=O)c2ccccc2Cl	54760	1	Zhao et al. J Chem Inf Model. 2007;47(1):170–175. DOI:10.1021/ci600312d
1974	CN(C(=O)CNC(=O)C(N)CCCCN)c1ccc(Cl)cc1C(=O)c2ccccc2	4490792	1	Zhao et al. J Chem Inf Model. 2007;47(1):170–175. DOI:10.1021/ci600312d
1975	CN(C(=O)CN(CCO)CCO)c1ccc(Cl)cc1C(=O)c2ccccc2Cl	71142	1	Zhao et al. J Chem Inf Model. 2007;47(1):170–175. DOI:10.1021/ci600312d
1976	CN(C(=O)C/C1=C/C=C(/[Cl])C([Cl])=C1)[C@@]3([H])CC[C@@]2(CCCO2)C[C@@]3([H])N4CCCC4	55652	1	Shen et al. J Chem Inf Model. 2010;50(6):1034-1041. DOI: 10.1021/ci100104j
1977	CN(C(=O)C/C1=C/C=C(/[Cl])C([Cl])=C1)[C@@]2([H])CCCC[C@@]2([H])N3CCCC3	3036289	1	Shen et al. J Chem Inf Model. 2010;50(6):1034-1041. DOI: 10.1021/ci100104j
1978	CN(C(=O)C([H])(C1=CC=CC=C1)C2=CC=CC=C2)[C@@]([H])(CN3CC[C@@](O)([H])C3)C4=CC=CC=C4	179340	1	Shen et al. J Chem Inf Model. 2010;50(6):1034-1041. DOI: 10.1021/ci100104j
1979	ClCSC(=O)[C@]1(OC(=O)CC)[C@@H](C)C[C@H]2[C@@]1(C)C[C@H](O)[C@@]1(F)[C@@]3(C)C([C@H](F)C[C@H]21)=CC(=O)C=C3	NA	1	Roy et al. ACS Omega. 2019; 4(16):16774-16780. DOI: 10.1021/acsomega.9b01512
1980	ClCOC(=O)[C@]1(OC(=O)OCC)[C@]2(C)[C@@H]([C@@H]3[C@@H]([C@H](O)C2)[C@]2(C)C(=CC(=O)C=C2)CC3)CC1	NA	1	Roy et al. ACS Omega. 2019; 4(16):16774-16780. DOI: 10.1021/acsomega.9b01512
1981	ClCCOC1=CC=2[C@@](C)([C@]3(F)[C@@H](O)C[C@]4(C)[C@@]5(C(=O)COC(=O)C)OC(C)(C)O[C@H]5C[C@@H]4[C@H]3CC=2C=O)CC1	125125237	1	Roy et al. ACS Omega. 2019; 4(16):16774-16780. DOI: 10.1021/acsomega.9b01512
1982	ClCCOC1=CC=2[C@@](C)([C@@]3(F)[C@H](O)C[C@@]4(C)[C@@]5(C(=O)CC(=O)C)OC(C)(C)O[C@H]5C[C@H]4[C@@H]3CC=2C#N)CC1	NA	1	Roy et al. ACS Omega. 2019; 4(16):16774-16780. DOI: 10.1021/acsomega.9b01512
1983	ClCCNC(=O)N(CCCl)N=O	2578	1	Zhao et al. J Chem Inf Model. 2007;47(1):170–175. DOI:10.1021/ci600312d
1984	ClCCN(N=O)C(=O)NC1CCCCC1	3950	1	Zhao et al. J Chem Inf Model. 2007;47(1):170–175. DOI:10.1021/ci600312d
1985	ClCCl	6344	1	Zhao et al. J Chem Inf Model. 2007;47(1):170–175. DOI:10.1021/ci600312d
1986	ClCCC2NC(=O)c1ccccc1O2	8602	1	Zhao et al. J Chem Inf Model. 2007;47(1):170–175. DOI:10.1021/ci600312d
1987	ClCCC(=O)NCCc1ccccc1	9376	1	Zhao et al. J Chem Inf Model. 2007;47(1):170–175. DOI:10.1021/ci600312d
1988	ClCCC(=O)NCc1ccccc1	10391	1	Zhao et al. J Chem Inf Model. 2007;47(1):170–175. DOI:10.1021/ci600312d
1989	ClCC[C@H]1Oc2c(C(=O)N1)cccc2	76971630	1	Roy et al. ACS Omega. 2019; 4(16):16774-16780. DOI: 10.1021/acsomega.9b01512
1990	ClCC(=O)[C@]1(OC(=O)CC)[C@@H](C)C[C@H]2[C@@]1(C)C[C@H](O)[C@@]1(F)[C@@]3(C)C(=CC(=O)C=C3)CC[C@H]21	NA	1	Roy et al. ACS Omega. 2019; 4(16):16774-16780. DOI: 10.1021/acsomega.9b01512
1991	ClCC(=O)[C@]1(O)[C@@H](C)C[C@H]2[C@@]1(C)C[C@H](O)[C@@]1(F)[C@@]3(C)C([C@H](F)C[C@H]21)=CC(=O)C=C3	NA	1	Roy et al. ACS Omega. 2019; 4(16):16774-16780. DOI: 10.1021/acsomega.9b01512
1992	ClCC(=O)[C@@]12[C@]3(C)[C@@H]([C@@H]4[C@@](F)([C@@H](O)C3)[C@@]3(C)C(=CC(=O)CC3)CC4)C[C@@H]1OC(C)(C)O2	NA	1	Roy et al. ACS Omega. 2019; 4(16):16774-16780. DOI: 10.1021/acsomega.9b01512
1993	ClCC(=O)[C@@]12[C@@]3(C)[C@@H]([C@@H]4[C@@](Cl)([C@@H](Cl)C3)[C@@]3(C)C([C@@H](F)C4)=CC(=O)C=C3)C[C@@H]1OC(C)(C)O2	NA	1	Roy et al. ACS Omega. 2019; 4(16):16774-16780. DOI: 10.1021/acsomega.9b01512
1994	ClCC(=O)[C@@]1(OC(=O)CCC)[C@@H](C)C[C@H]2[C@]1(C)CC(=O)[C@@]1(F)[C@@]3(C)C(=CC(=O)C=C3)CC[C@H]21	NA	1	Roy et al. ACS Omega. 2019; 4(16):16774-16780. DOI: 10.1021/acsomega.9b01512
1995	ClCC(=O)[C@@]1(OC(=O)c2occc2)[C@H](C)C[C@@H]2[C@@]1(C)C[C@H](O)[C@]1(Cl)[C@]3(C)C(=CC(=O)C=C3)CC[C@@H]21	NA	1	Roy et al. ACS Omega. 2019; 4(16):16774-16780. DOI: 10.1021/acsomega.9b01512
1996	ClCC(=O)[C@@]1(O)[C@@H](C)C[C@H]2[C@]1(C)CC(=O)[C@@]1(F)[C@@]3(C)C(=CC(=O)C=C3)CC[C@H]21	NA	1	Roy et al. ACS Omega. 2019; 4(16):16774-16780. DOI: 10.1021/acsomega.9b01512
1997	ClCC(=O)[C@@]1(O)[C@@H](C)C[C@H]2[C@]1(C)C[C@H](O)[C@@]1(F)[C@@]3(C)C(=CC(=O)C=C3)CC[C@H]21	NA	1	Roy et al. ACS Omega. 2019; 4(16):16774-16780. DOI: 10.1021/acsomega.9b01512
1998	Clc6ccc5CCc1ccccc1N(CCCN2CCC4(CC2)N3CCCCC3NC4=O)c5c6	4257	1	Zhao et al. J Chem Inf Model. 2007;47(1):170–175. DOI:10.1021/ci600312d
1999	Clc5ccc4Sc1ccccc1N(CCCN2CCC3(CC2)NC(=O)CS3)c4c5	65714	1	Zhao et al. J Chem Inf Model. 2007;47(1):170–175. DOI:10.1021/ci600312d
[truncated: 1,606 more rows]
